# Supplementary material for: Conserved Cell-Type-Specific Transcriptomic Networks and Regulatory Programs Underlie Alcohol Dependence Across Mouse and Human
Source: Research Square preprint supplement (doi:10.21203/rs.3.rs-9417955/v1), 2026-04-21
Supplement: Supplementary file 1 [file 08ee303fb54d0205204b509f.xlsx]

## Sheet: Microglia_conserved_modules
	gene_name	module	color	kME_yellow	kME_grey	kME_blue	kME_brown	kME_black	kME_turquoise	kME_green	kME_red
NOC2L	NOC2L	yellow	yellow	0.0875697	0.0695887	0.0626832	0.0492233	0.0142425	0.0024145	0.0250621	0.00149933
AGRN	AGRN	grey	grey	0.13751	0.258583	0.197241	0.0776914	0.0655993	-0.0517848	0.127151	0.006555
C1orf159	C1orf159	grey	grey	0.0255356	-0.0215873	0.046456	-0.043607	-0.0644021	0.0342061	-0.0322536	0.0523827
SDF4	SDF4	grey	grey	0.0737117	0.126222	0.0465026	0.10483	0.103402	-0.0272932	0.115484	-0.0406349
UBE2J2	UBE2J2	grey	grey	0.0708316	0.0820099	0.060461	0.0341532	0.0252331	0.0196396	0.0531233	0.0269071
ACAP3	ACAP3	blue	blue	-0.0111265	-0.081464	0.0875414	0.00434433	-0.0894216	-0.0683156	-0.0781323	-0.00884395
INTS11	INTS11	grey	grey	0.0138794	-0.0209216	0.0261741	0.00634749	-0.0164773	0.0343651	0.0016094	0.0477141
DVL1	DVL1	grey	grey	0.067326	0.0749617	0.0823614	0.0630357	0.0204644	-0.0222997	0.0431324	-0.00473921
AURKAIP1	AURKAIP1	brown	brown	-0.000853754	0.0906596	-0.00835684	0.17791	0.196672	-0.0580261	0.16634	-0.0663656
CCNL2	CCNL2	grey	grey	0.179171	0.175738	0.0884583	0.0101345	0.026858	0.0637173	0.0811539	0.0268609
MRPL20	MRPL20	black	black	0.0147682	0.102373	0.00195349	0.164359	0.209351	-0.0256783	0.168108	-0.0321875
ATAD3A	ATAD3A	grey	grey	0.105781	0.142913	0.107145	0.0261727	0.026194	-0.00637463	0.0597625	0.0151126
TMEM240	TMEM240	brown	brown	0.0322251	0.0551518	0.0621207	0.107028	0.0621063	-0.0569439	0.0599239	-0.0348575
SSU72	SSU72	brown	brown	0.0879625	0.154689	0.0289002	0.176327	0.171524	-0.0178954	0.179778	-0.0486179
MIB2	MIB2	yellow	yellow	0.0487364	0.0184729	0.0649282	0.00519798	-0.03115	-0.015079	-0.0127729	0.00607518
CDK11B	CDK11B	turquoise	turquoise	0.186242	0.221935	0.0677534	0.0520313	0.0877123	0.0329585	0.141247	-0.0240858
SLC35E2B	SLC35E2B	grey	grey	0.103911	0.118662	0.0939204	0.0142878	0.0190448	0.0297727	0.0545738	0.0367606
NADK	NADK	grey	grey	0.121761	0.125463	0.0414208	0.0473953	0.0455799	0.0286872	0.0687632	-0.00865301
GNB1	GNB1	green	green	0.0448714	-0.0496649	0.020954	0.0785782	0.0349793	0.154869	0.047892	0.151814
CFAP74	CFAP74	turquoise	turquoise	0.14727	0.061283	-0.00899596	-0.0355692	-0.0294301	0.117159	-0.010756	0.0461286
GABRD	GABRD	brown	brown	0.00280704	-0.0292929	0.0936997	0.101405	-0.00483245	-0.0651189	-0.0237753	-0.0091456
PRKCZ	PRKCZ	blue	blue	0.102635	0.156601	0.205032	0.136383	0.0655154	-0.0660362	0.0966218	0.00634868
SKI	SKI	turquoise	turquoise	0.0974881	-0.119736	-0.065396	-0.115079	-0.111928	0.289366	-0.0957301	0.210701
RER1	RER1	grey	grey	0.0395753	0.0651172	-0.005819	0.0836656	0.0961018	0.00303979	0.0920474	-0.0169043
TPRG1L	TPRG1L	brown	brown	0.0290319	0.0537581	0.0319626	0.200801	0.134241	-0.0554805	0.111841	-0.0510976
CEP104	CEP104	grey	grey	0.0435696	0.00906967	0.0458225	0.0011483	-0.0150531	0.051211	-0.00252672	0.0636574
AJAP1	AJAP1	blue	blue	0.0765565	0.134205	0.158771	0.0952034	0.0598029	-0.0546123	0.0915673	-0.00273297
NPHP4	NPHP4	red	red	0.0310907	-0.00222041	0.115557	-0.0271071	-0.0597085	0.0617719	-0.0244953	0.146129
KCNAB2	KCNAB2	brown	brown	0.0176092	0.0197858	0.113829	0.160035	0.0609696	-0.0470301	0.0592235	0.00412511
CHD5	CHD5	blue	blue	0.0724936	0.140441	0.214262	0.17339	0.0605734	-0.131293	0.0801482	-0.0444306
ACOT7	ACOT7	brown	brown	0.0449967	0.108128	0.107315	0.175977	0.124833	-0.060651	0.114064	-0.0223852
PLEKHG5	PLEKHG5	blue	blue	0.0949049	0.119729	0.182494	0.0357794	0.00231669	0.0102922	0.0544365	0.075837
NOL9	NOL9	grey	grey	0.0110081	-0.0551694	0.018849	-0.0411833	-0.0609782	0.0710548	-0.0457195	0.0769019
THAP3	THAP3	grey	grey	0.223379	0.278005	0.0462316	0.0547094	0.0896479	0.0057906	0.131283	-0.0849075
DNAJC11	DNAJC11	grey	grey	0.0585264	0.0149481	0.0307703	-0.0117386	-0.0160474	0.0785252	0.00389735	0.0747689
CAMTA1	CAMTA1	blue	blue	0.118909	0.0476045	0.25574	0.034859	-0.048127	0.0519257	0.0103699	0.156251
PER3	PER3	yellow	yellow	0.092575	-0.00120499	0.101641	-0.0202286	-0.064121	0.0760193	-0.027426	0.110867
PARK7	PARK7	black	black	0.0191586	0.160912	-0.000425667	0.239231	0.312571	-0.0563548	0.251928	-0.0718929
ERRFI1	ERRFI1	grey	grey	0.0748682	0.0763079	0.0640291	0.0128454	0.00737011	0.0122818	0.0362487	0.0122963
RERE	RERE	turquoise	turquoise	0.155211	-0.118647	0.0332881	-0.189477	-0.194718	0.393112	-0.104676	0.352224
ENO1	ENO1	black	black	3.07545901808107e-05	0.0983432	0.007146	0.229176	0.256116	-0.0304056	0.207005	-0.0255382
SLC2A5	SLC2A5	turquoise	turquoise	-0.0642158	-0.274045	-0.132759	-0.185607	-0.166533	0.304201	-0.148376	0.273014
SLC25A33	SLC25A33	green	green	-0.00986915	-0.0399239	-0.0134643	0.00913705	0.0284079	0.0827569	0.0424128	0.0907294
PIK3CD	PIK3CD	turquoise	turquoise	0.116723	-0.04946	-0.119419	-0.10494	-0.0807677	0.224379	-0.0729457	0.0925302
CLSTN1	CLSTN1	brown	brown	0.0686678	0.106761	0.111788	0.282315	0.171529	-0.0588447	0.14061	-0.0214784
CTNNBIP1	CTNNBIP1	grey	grey	0.0705655	0.0737739	0.0495585	0.0702139	0.0774845	0.0264206	0.0914998	0.028252
UBE4B	UBE4B	turquoise	turquoise	0.107859	-0.00787016	0.0884921	-0.0489735	-0.0613317	0.157305	-0.00497448	0.161339
KIF1B	KIF1B	blue	blue	0.165815	0.187079	0.249297	0.145628	0.0858842	-0.0134104	0.151644	0.0486927
PEX14	PEX14	turquoise	turquoise	0.104446	0.0342214	0.027316	-0.0175659	-0.00359957	0.137883	0.0221883	0.103766
TARDBP	TARDBP	yellow	yellow	0.231961	0.332801	0.0956351	0.100431	0.134619	-0.03079	0.174025	-0.09428
SRM	SRM	grey	grey	-0.00794166	-0.0331197	0.0259049	0.0785545	0.0248148	-0.0181589	0.0153613	0.00463125
EXOSC10	EXOSC10	grey	grey	0.101013	0.08473	0.0819322	-0.0025149	-0.000506496	0.0491076	0.0330082	0.0488606
MTOR	MTOR	grey	grey	0.081378	0.00962455	0.0645586	-0.0281138	-0.0294575	0.125399	0.00497061	0.127417
FBXO2	FBXO2	brown	brown	-0.0255036	-0.00135827	0.0088871	0.158044	0.124183	-0.0380742	0.0901258	-0.020593
FBXO44	FBXO44	grey	grey	0.00985175	-0.00296068	0.0663641	0.0769402	0.0160165	-0.0352967	0.00562827	-0.00129275
MTHFR	MTHFR	grey	grey	-0.00563685	-0.119572	-0.0154803	-0.0747431	-0.0747751	0.154131	-0.0645483	0.161418
CLCN6	CLCN6	grey	grey	0.00327037	-0.0830092	0.0211897	-0.0179733	-0.060038	0.0804657	-0.0495406	0.0944298
MFN2	MFN2	grey	grey	0.0560392	0.0548939	0.0566757	0.0693465	0.0441859	0.0194815	0.0560861	0.0243634
TNFRSF1B	TNFRSF1B	turquoise	turquoise	-0.0868124	-0.333225	-0.19537	-0.197666	-0.150072	0.383984	-0.111757	0.284017
VPS13D	VPS13D	turquoise	turquoise	0.0711158	-0.111584	0.0283081	-0.121155	-0.131545	0.257299	-0.0763185	0.250586
DHRS3	DHRS3	turquoise	turquoise	0.0154854	-0.125283	-0.101711	-0.0785128	-0.0719202	0.206625	-0.0652613	0.155736
PRDM2	PRDM2	turquoise	turquoise	0.0485121	-0.110535	-0.0143791	-0.0598593	-0.0764504	0.216119	-0.0408879	0.182125
KAZN	KAZN	blue	blue	-0.0606436	-0.229303	0.15138	-0.109048	-0.205075	-0.022607	-0.184874	0.0761671
TMEM51	TMEM51	red	red	-0.0560249	-0.168119	-0.0685367	-0.0800183	-0.0821685	0.165348	-0.109194	0.169014
EFHD2	EFHD2	grey	grey	0.0869022	0.159207	0.000799672	0.15422	0.168709	-0.0178237	0.166192	-0.0764184
DNAJC16	DNAJC16	grey	grey	0.0380667	-0.0246707	0.0379485	0.0156775	-0.0186083	0.0545669	-0.0145611	0.0680418
DDI2	DDI2	turquoise	turquoise	0.149182	0.0933938	0.0114055	-0.000574196	0.0114604	0.128019	0.0514055	0.0599288
PLEKHM2	PLEKHM2	grey	grey	0.0994903	0.0102888	0.0238292	-0.0283615	-0.0323238	0.147555	0.00515963	0.12187
SPEN	SPEN	grey	grey	0.00198148	-0.156419	-0.00515557	-0.0766529	-0.0899308	0.192775	-0.0630739	0.201502
FBXO42	FBXO42	grey	grey	0.01883	-0.111546	0.0156718	-0.111302	-0.107141	0.182889	-0.0681687	0.192477
SZRD1	SZRD1	turquoise	turquoise	0.0683922	0.0316944	0.0126639	-0.00360335	0.00390746	0.0766593	0.0234247	0.0425044
NECAP2	NECAP2	grey	grey	0.103359	0.0942968	0.0228991	0.0052398	0.027676	0.0626774	0.0595088	0.022155
CROCC	CROCC	red	red	-0.0231684	-0.0843564	0.0288132	-0.0389926	-0.04805	0.122858	-0.0241667	0.175126
ATP13A2	ATP13A2	brown	brown	0.0330363	0.0198633	0.0639446	0.114263	0.0525074	-0.0228476	0.0362664	-0.002124
SDHB	SDHB	green	green	0.0677302	0.176954	0.0276103	0.172247	0.210169	-0.0387124	0.238045	-0.0587394
PADI2	PADI2	turquoise	turquoise	-0.135203	-0.354907	-0.187572	-0.201115	-0.135005	0.390567	-0.0843881	0.340544
ARHGEF10L	ARHGEF10L	grey	grey	0.0242894	-0.092199	0.0102478	-0.0579987	-0.0539618	0.209499	-0.0123264	0.208034
IGSF21	IGSF21	red	red	-0.111229	-0.32811	-0.0310572	-0.125288	-0.170712	0.32269	-0.167684	0.435888
UBR4	UBR4	turquoise	turquoise	0.0256113	-0.068379	0.0167308	-0.0518031	-0.0423111	0.17556	0.000280511	0.163215
EMC1	EMC1	grey	grey	0.0487065	0.0643215	0.0362673	0.0684897	0.05332	0.00573289	0.0641678	0.00269871
CAPZB	CAPZB	turquoise	turquoise	-0.0710393	-0.343813	-0.15115	-0.137526	-0.140639	0.386901	-0.144695	0.353118
MICOS10	MICOS10	grey	grey	-0.0377728	-0.0849187	-0.0475162	0.0310589	0.0271088	0.09564	-0.0140314	0.12324
NBL1	NBL1	brown	brown	-0.0371129	-0.0899315	0.018189	0.0754738	-0.0136325	-0.0242313	-0.0363977	0.00559988
CAMK2N1	CAMK2N1	brown	brown	0.0186138	0.125341	0.101711	0.457291	0.288468	-0.261163	0.201718	-0.224611
PINK1	PINK1	black	black	-0.00967807	0.0337513	0.0134455	0.17685	0.170287	0.00378105	0.120288	0.0151351
DDOST	DDOST	green	green	0.0191845	0.0631194	0.00274437	0.0777813	0.0931912	-0.00850301	0.105907	-0.0145641
SH2D5	SH2D5	blue	blue	0.0571672	0.128347	0.12244	0.0990355	0.0680892	-0.063453	0.0787567	-0.019727
HP1BP3	HP1BP3	grey	grey	-0.00213785	-0.122206	-0.018292	0.00159108	-0.0259419	0.134289	-0.0332624	0.141851
EIF4G3	EIF4G3	turquoise	turquoise	0.0462788	-0.187897	0.0428262	-0.146158	-0.185078	0.305753	-0.137868	0.329391
ECE1	ECE1	grey	grey	0.0729324	0.0813912	0.104761	0.0289856	0.0273235	0.00497609	0.0669622	0.0241191
RAP1GAP	RAP1GAP	blue	blue	0.0650822	0.101216	0.173544	0.107205	0.0333809	-0.0587877	0.0580793	0.0206999
USP48	USP48	turquoise	turquoise	0.115491	-0.000626233	0.062605	-0.0497062	-0.0568115	0.167517	-0.011305	0.147124
CDC42	CDC42	grey	grey	0.191819	0.253078	0.0308631	0.157301	0.188976	0.0191664	0.196281	-0.0639941
ZBTB40	ZBTB40	grey	grey	0.0352486	-0.0307848	0.00276149	-0.0362977	-0.0331302	0.111059	-0.011602	0.102136
C1QA	C1QA	grey	grey	0.151005	0.145619	-0.104213	0.0696543	0.123426	0.0596784	0.113569	-0.0997049
C1QC	C1QC	turquoise	turquoise	0.228435	0.163284	-0.121071	0.0498699	0.112618	0.139257	0.119869	-0.0665527
C1QB	C1QB	turquoise	turquoise	0.13422	0.069641	-0.133586	0.0325521	0.0796286	0.143402	0.0722101	-0.0181466
EPHB2	EPHB2	red	red	0.000877206	-0.093705	0.0464307	-0.0433453	-0.0688601	0.17176	-0.0583225	0.259115
KDM1A	KDM1A	grey	grey	0.145305	0.141171	0.11826	0.0252527	0.0198057	0.0585037	0.0635394	0.0574997
LUZP1	LUZP1	grey	grey	0.0709018	0.0210648	0.064403	0.0131693	0.0143935	0.132901	0.0419468	0.154183
HNRNPR	HNRNPR	grey	grey	0.25185	0.388483	0.151449	0.125143	0.160038	-0.0466595	0.21195	-0.0903614
PITHD1	PITHD1	brown	brown	-0.00694635	-0.0134666	0.0308973	0.109181	0.0531241	-0.025117	0.038056	-0.00193795
HMGCL	HMGCL	turquoise	turquoise	0.133521	0.128665	0.0292131	0.0308182	0.0526454	0.0484023	0.0800513	0.0037382
FUCA1	FUCA1	turquoise	turquoise	0.0996297	0.118252	-0.0135647	0.0427609	0.0774727	0.0360339	0.101746	-0.0310366
SRSF10	SRSF10	grey	grey	0.105937	0.0645859	0.037201	0.0143952	0.0290249	0.101662	0.0651539	0.0689382
NIPAL3	NIPAL3	green	green	0.0307757	-0.00228624	0.016174	0.0487236	0.0341962	0.0499307	0.0473152	0.0448263
SRRM1	SRRM1	yellow	yellow	0.186132	0.120532	0.0761364	4.04429642707473e-05	0.0012111	0.0946821	0.0544844	0.0566519
CLIC4	CLIC4	green	green	0.0491149	0.0326907	0.000117915	-0.00427107	0.0273363	0.063207	0.0860746	0.0359553
SYF2	SYF2	grey	grey	0.0203618	0.0731889	-0.00650191	0.103831	0.132734	-0.0166653	0.134049	-0.0325888
RSRP1	RSRP1	yellow	yellow	0.31466	0.26671	0.00837573	0.0513401	0.101268	0.083979	0.138224	-0.0643997
TMEM50A	TMEM50A	brown	brown	0.0778232	0.164663	0.0231299	0.158866	0.18079	-0.0477046	0.160493	-0.081329
MACO1	MACO1	grey	grey	0.117028	0.111421	0.149571	0.00225591	-0.0106237	0.0737481	0.0423425	0.113357
MAN1C1	MAN1C1	turquoise	turquoise	0.21831	0.0672276	-0.0117399	-0.0426191	-0.0450689	0.168833	-0.0118016	0.0469355
STMN1	STMN1	brown	brown	0.0340223	0.294699	0.00239553	0.478557	0.501506	-0.205379	0.405274	-0.223744
SH3BGRL3	SH3BGRL3	brown	brown	0.00215766	0.162331	-0.00438084	0.250756	0.284212	-0.0976153	0.248893	-0.107051
UBXN11	UBXN11	blue	blue	0.104698	0.166273	0.213486	0.0312038	-0.0108114	-0.027256	0.0515797	0.0532352
DHDDS	DHDDS	grey	grey	0.146365	0.185315	0.143642	0.0381182	0.039883	0.0491394	0.100543	0.0698888
HMGN2	HMGN2	grey	grey	-0.0279141	-0.0551272	-0.00688936	0.0376266	0.0217534	0.0264403	0.00660583	0.0378952
ARID1A	ARID1A	turquoise	turquoise	0.132848	-0.0692421	-0.0362318	-0.0922848	-0.105781	0.232016	-0.0790918	0.144581
ZDHHC18	ZDHHC18	yellow	yellow	0.144194	0.163665	0.0758178	0.0361247	0.0496266	-0.00586042	0.0869433	-0.0248099
NUDC	NUDC	black	black	0.020552	0.142189	-0.0056561	0.203505	0.270019	-0.0429823	0.230808	-0.0658823
TRNP1	TRNP1	brown	brown	0.0300315	0.181508	0.0627031	0.21071	0.222939	-0.0939413	0.202126	-0.0756411
SLC9A1	SLC9A1	grey	grey	0.124827	0.127796	0.0667015	0.0487978	0.0376048	0.0259448	0.0591964	-0.00139481
WDTC1	WDTC1	grey	grey	0.0216095	-0.00606877	0.0506914	0.00285921	-0.00236801	0.0622432	0.015262	0.0912826
TMEM222	TMEM222	brown	brown	0.023781	0.0407422	0.0313015	0.0885005	0.0579295	-0.048284	0.054257	-0.0378568
WASF2	WASF2	turquoise	turquoise	0.17109	-0.0557234	-0.163327	-0.13199	-0.097673	0.319531	-0.0797323	0.139115
AHDC1	AHDC1	grey	grey	0.0591019	0.00741328	0.0791044	0.0184132	-0.0288383	0.0398762	-0.00251402	0.0608319
FAM76A	FAM76A	grey	grey	0.114453	0.200002	0.100213	0.0965608	0.10635	-0.0252456	0.13167	-0.0223695
STX12	STX12	grey	grey	0.0369719	-0.02291	0.0104475	0.0110391	0.0241164	0.139311	0.0417753	0.123689
THEMIS2	THEMIS2	turquoise	turquoise	-0.0463217	-0.187216	-0.129734	-0.123526	-0.0768374	0.234151	-0.0432033	0.156036
EYA3	EYA3	turquoise	turquoise	0.105063	0.00489515	0.0430715	-0.0634941	-0.066799	0.155943	-0.0258467	0.141606
PTAFR	PTAFR	turquoise	turquoise	-0.0168416	-0.134326	-0.0831251	-0.0716729	-0.0825394	0.152219	-0.101573	0.130842
DNAJC8	DNAJC8	grey	grey	0.103003	0.165815	0.0502421	0.137611	0.145679	-0.00474945	0.151451	-0.0309017
PHACTR4	PHACTR4	turquoise	turquoise	0.0158913	-0.160637	-0.0591783	-0.115231	-0.110229	0.213944	-0.0816772	0.185825
TRNAU1AP	TRNAU1AP	grey	grey	0.0455508	0.00292257	0.00772911	-0.0118131	0.00129543	0.0646765	0.0126974	0.0529108
TAF12	TAF12	grey	grey	0.0632579	0.055187	0.0111313	0.0106884	0.0280429	0.056324	0.0417845	0.0378959
GMEB1	GMEB1	turquoise	turquoise	0.184942	0.154939	0.0346422	-0.0075687	0.0130814	0.0739078	0.0566939	-0.000898963
YTHDF2	YTHDF2	grey	grey	0.0763642	0.0252765	-0.0175526	0.00596937	0.0125518	0.0890669	0.0231771	0.0348574
EPB41	EPB41	turquoise	turquoise	0.059472	-0.0758065	-0.0333346	-0.122359	-0.100185	0.25531	-0.0627514	0.222725
SRSF4	SRSF4	turquoise	turquoise	0.0369279	-0.0660862	-0.0114575	-0.0595669	-0.0456379	0.169739	-0.0205535	0.148858
MECR	MECR	grey	grey	0.146837	0.207446	0.150202	0.0392564	0.0470737	0.0122492	0.0954895	0.0389722
LAPTM5	LAPTM5	turquoise	turquoise	0.00707858	-0.147032	-0.140285	-0.125425	-0.0985643	0.222007	-0.0907537	0.124086
SDC3	SDC3	grey	grey	0.0253293	-0.01752	0.041487	0.0774179	0.0177338	-0.00429142	0.0181522	0.0103453
PUM1	PUM1	grey	grey	0.0835282	-0.102427	0.0285046	-0.0612743	-0.101851	0.230851	-0.0569511	0.2165
SNRNP40	SNRNP40	grey	grey	0.0859579	0.0585379	0.0476231	0.00706234	0.014951	0.0762323	0.04496	0.0631916
ZCCHC17	ZCCHC17	grey	grey	0.0552627	0.0998994	0.0419918	0.118831	0.119748	-0.000225332	0.122808	-0.00800475
FABP3	FABP3	brown	brown	0.0528074	0.197688	0.0249397	0.22617	0.253333	-0.100746	0.230385	-0.119499
ADGRB2	ADGRB2	blue	blue	0.0276595	0.0605552	0.163362	0.160143	0.0460237	-0.119757	0.0481656	-0.0340649
PTP4A2	PTP4A2	turquoise	turquoise	0.237512	0.219687	-0.0277241	0.0489222	0.115085	0.10659	0.147873	-0.0503666
KHDRBS1	KHDRBS1	turquoise	turquoise	0.151006	0.0750244	0.0157462	0.0168673	0.0215679	0.127264	0.0572265	0.0468617
TMEM39B	TMEM39B	grey	grey	0.0479364	0.00919692	0.0557272	-0.00862583	-0.0305514	0.0412913	-0.00439885	0.0552463
KPNA6	KPNA6	grey	grey	0.0274756	-0.0335015	0.0126825	-0.0255356	-0.016629	0.134705	0.00957785	0.125602
TXLNA	TXLNA	grey	grey	0.114339	0.091763	0.0417765	0.016522	0.0158122	0.0539005	0.0531966	0.0186654
TMEM234	TMEM234	green	green	0.194372	0.32932	0.086428	0.149726	0.194479	-0.0575931	0.274372	-0.107395
EIF3I	EIF3I	green	green	0.0327202	0.139717	0.00494995	0.165159	0.201422	-0.0538902	0.220326	-0.0737132
HDAC1	HDAC1	turquoise	turquoise	0.098066	0.0689931	0.0148684	-0.0138082	-3.53459e-05	0.0628007	0.0335544	0.021928
BSDC1	BSDC1	grey	grey	0.0407929	-0.0372991	0.0115859	-0.0206505	-0.0434854	0.0899894	-0.019367	0.0878083
ZBTB8OS	ZBTB8OS	grey	grey	0.00585495	-0.0846998	0.0233921	-0.0324669	-0.0539398	0.0767084	-0.0492285	0.0929884
RBBP4	RBBP4	grey	grey	0.0886616	0.0339674	0.0264286	0.0316074	0.0220566	0.0927316	0.0452777	0.0643454
YARS1	YARS1	grey	grey	0.0890839	0.0386875	0.04726	0.00919261	0.00894917	0.080792	0.0287359	0.0645869
S100PBP	S100PBP	grey	grey	0.0572529	-0.0278586	0.0327088	-0.0413891	-0.0539719	0.129914	-0.0326133	0.144947
HPCA	HPCA	brown	brown	0.0225274	0.0668673	0.0437472	0.211145	0.167336	-0.0325472	0.133131	-0.0154259
RNF19B	RNF19B	turquoise	turquoise	0.040159	-0.031363	-0.0290609	-0.0211413	-0.0205342	0.127615	0.00220203	0.0819036
AK2	AK2	grey	grey	0.0554438	0.0144598	0.00514228	-0.0191034	-0.000983108	0.108513	0.0196508	0.0926247
AZIN2	AZIN2	blue	blue	-0.0160537	-0.104617	0.0179371	-0.0366997	-0.0684187	0.119094	-0.0719984	0.17938
ZNF362	ZNF362	grey	grey	0.0323474	-0.0373981	0.0263612	-0.035271	-0.0492439	0.0870597	-0.037762	0.110948
PHC2	PHC2	turquoise	turquoise	0.201043	0.0315774	-0.0343706	-0.0995551	-0.0586849	0.286683	-0.00420983	0.164349
CSMD2	CSMD2	blue	blue	0.233079	0.383106	0.501494	0.0649227	0.0220454	-0.0788757	0.143954	0.115523
SMIM12	SMIM12	green	green	-0.00563079	0.00620712	-0.00164271	0.0637488	0.0727112	0.00700626	0.0701868	0.00789536
DLGAP3	DLGAP3	blue	blue	0.13377	0.262569	0.286654	0.158877	0.109561	-0.103825	0.164306	0.00267135
ZMYM6	ZMYM6	grey	grey	0.213423	0.270284	0.15488	0.0264186	0.0383486	-0.00328672	0.0922415	-0.019559
ZMYM1	ZMYM1	grey	grey	0.0587765	0.075966	0.0909671	0.021927	0.0235351	0.0487479	0.0662933	0.0848938
SFPQ	SFPQ	turquoise	turquoise	0.11478	0.0152039	0.0414723	-0.0337316	-0.0256863	0.183143	0.0268897	0.144344
ZMYM4	ZMYM4	turquoise	turquoise	0.176728	0.0600953	0.116368	-0.0638748	-0.0840561	0.196739	-0.0159778	0.188202
KIAA0319L	KIAA0319L	turquoise	turquoise	0.0926598	-0.0453152	0.018525	-0.0661709	-0.077683	0.186286	-0.0434124	0.161812
NCDN	NCDN	brown	brown	-0.0100868	-0.0030299	0.0720275	0.252069	0.115878	-0.0975917	0.0696331	-0.051779
PSMB2	PSMB2	grey	grey	0.102188	0.182722	0.0819711	0.136269	0.140311	-0.0364391	0.159767	-0.0408891
AGO4	AGO4	turquoise	turquoise	-0.0358191	-0.211081	-0.0334883	-0.113948	-0.129918	0.220747	-0.121463	0.230329
AGO1	AGO1	grey	grey	0.0929049	0.0290885	0.0519366	-0.0169884	-0.0258556	0.0894969	-0.0046892	0.0768459
AGO3	AGO3	turquoise	turquoise	0.190148	0.0716065	0.102103	-0.0553457	-0.0623276	0.183404	0.0066049	0.154071
TRAPPC3	TRAPPC3	grey	grey	0.0502482	0.120171	0.0358102	0.112136	0.128547	-0.0218962	0.132374	-0.016802
MAP7D1	MAP7D1	grey	grey	0.0620971	0.0894247	0.0599917	0.110926	0.0866319	0.00458124	0.0980149	0.00827568
THRAP3	THRAP3	turquoise	turquoise	0.115738	0.0179289	0.00567338	-0.0245763	-0.00901639	0.177689	0.0231567	0.115981
STK40	STK40	turquoise	turquoise	0.0724324	0.0215672	0.0380409	-0.0386557	-0.022002	0.1227	0.0173796	0.110994
MRPS15	MRPS15	grey	grey	0.0816782	0.157113	0.040076	0.10098	0.117375	-0.0330635	0.128854	-0.0522204
CSF3R	CSF3R	turquoise	turquoise	0.20048	-0.026767	-0.198887	-0.126145	-0.0664181	0.332062	-0.0522113	0.102988
GRIK3	GRIK3	blue	blue	0.1762	0.303817	0.333416	0.073053	0.0517107	-0.0636956	0.135365	0.0566154
MEAF6	MEAF6	grey	grey	0.112902	0.117135	0.100456	0.0824358	0.0439211	-0.00191077	0.0752054	0.00262838
GNL2	GNL2	grey	grey	0.0962903	0.113084	0.0475271	0.0152047	0.0345418	0.0481872	0.0738471	0.0323802
EPHA10	EPHA10	blue	blue	0.114283	0.205002	0.251633	0.0670484	0.0255202	-0.056845	0.0815047	0.0409038
C1orf122	C1orf122	grey	grey	-0.00946229	0.0270591	0.00248828	0.114017	0.118181	-0.0171697	0.0995588	-0.014459
MTF1	MTF1	grey	grey	0.061221	0.0275465	0.0292973	-0.0036815	0.00320306	0.0824369	0.032164	0.0703552
INPP5B	INPP5B	turquoise	turquoise	0.0239396	-0.077467	0.0214751	-0.0685597	-0.0720806	0.152329	-0.036591	0.153294
SF3A3	SF3A3	grey	grey	0.0373005	0.0339851	0.0269752	0.0187186	0.0195257	0.0411109	0.0404614	0.0400076
UTP11	UTP11	grey	grey	0.110819	0.152623	0.048189	0.0657047	0.081112	0.0124895	0.0995143	-0.0181696
RRAGC	RRAGC	grey	grey	0.110906	0.151653	0.0272318	0.0916325	0.100419	-0.0122381	0.107154	-0.054652
AKIRIN1	AKIRIN1	grey	grey	0.0689748	0.0444327	0.0097634	0.0641501	0.0670209	0.0574147	0.0670326	0.0318437
NDUFS5	NDUFS5	black	black	0.0417324	0.232441	-0.000423863	0.306455	0.3908	-0.117609	0.307718	-0.141378
MACF1	MACF1	turquoise	turquoise	0.342221	0.15101	0.100731	-0.107584	-0.0901342	0.2754	0.017414	0.16095
PABPC4	PABPC4	grey	grey	0.142628	0.166275	0.0945123	0.0366579	0.0359292	0.0550509	0.0817343	0.0506059
HPCAL4	HPCAL4	brown	brown	0.0430598	0.137336	0.0979032	0.295655	0.204048	-0.123787	0.191951	-0.0958236
TRIT1	TRIT1	turquoise	turquoise	0.0969812	0.0375004	0.0374073	-0.0451867	-0.0397622	0.0978697	-0.00914941	0.071668
CAP1	CAP1	turquoise	turquoise	0.102812	0.0214252	-0.0190004	-0.0117905	-0.0014074	0.163171	0.0261845	0.100614
PPT1	PPT1	grey	grey	0.210342	0.214641	0.0698216	0.0479247	0.0616423	0.0682135	0.100514	0.0103989
RLF	RLF	turquoise	turquoise	0.0867409	-0.0546386	0.00695834	-0.0858419	-0.0707132	0.249571	-0.0123397	0.20529
ZMPSTE24	ZMPSTE24	grey	grey	0.0380701	0.0135107	0.0348842	0.0168304	0.00622085	0.0520501	0.019706	0.0559284
SMAP2	SMAP2	turquoise	turquoise	0.0801753	-0.199518	-0.185355	-0.176838	-0.12522	0.431491	-0.0757979	0.271327
RIMS3	RIMS3	blue	blue	0.0167798	-0.0377537	0.12091	0.119571	-0.0140966	-0.0471436	-0.0158567	0.0211503
NFYC	NFYC	grey	grey	0.126465	0.063074	0.0826095	-0.0247189	-0.04101	0.117151	0.0090607	0.105903
SCMH1	SCMH1	turquoise	turquoise	0.218371	0.132191	0.148391	-0.0523975	-0.054421	0.142881	0.026001	0.123752
HIVEP3	HIVEP3	turquoise	turquoise	0.197118	0.0510789	0.0692341	-0.112089	-0.095224	0.285112	-0.0256876	0.238692
FOXJ3	FOXJ3	grey	grey	0.0279683	-0.123394	0.0109643	-0.0821499	-0.101017	0.181222	-0.0693	0.180348
CCDC30	CCDC30	red	red	0.0789916	0.0831394	0.20002	-0.0112133	-0.0288278	0.0325226	0.0282465	0.13251
YBX1	YBX1	green	green	0.0636384	0.156448	0.0260619	0.138324	0.187217	-0.00378122	0.231707	-0.0250388
SLC2A1	SLC2A1	green	green	0.0310704	0.138344	-0.0148177	0.126346	0.172567	-0.0588102	0.204493	-0.0853652
SZT2	SZT2	grey	grey	-0.00296135	-0.0767188	0.00488344	-0.056915	-0.0569735	0.0985081	-0.0479197	0.119604
PTPRF	PTPRF	blue	blue	0.0400495	0.0211051	0.11989	0.073909	0.00404261	-0.0303009	0.0211825	0.0242781
ST3GAL3	ST3GAL3	yellow	yellow	0.363542	0.352823	0.140495	0.0287091	0.0415727	0.0260149	0.114769	-0.0734018
ATP6V0B	ATP6V0B	yellow	yellow	0.307755	0.429036	0.110447	0.225269	0.259073	-0.0926099	0.27289	-0.1816
B4GALT2	B4GALT2	brown	brown	0.0133047	-0.00232156	0.0670096	0.122475	0.0347519	-0.0534381	0.0191152	-0.0218905
ERI3	ERI3	yellow	yellow	0.18804	0.092503	0.0824541	0.00112175	-0.0156034	0.104342	0.021983	0.0736614
RNF220	RNF220	grey	grey	0.107723	-0.015948	0.0401598	-0.0301971	-0.0402013	0.0846762	0.011398	0.0709885
EIF2B3	EIF2B3	turquoise	turquoise	0.0609763	-0.0164495	0.0109035	-0.0479764	-0.0381966	0.147171	-0.00730183	0.127401
ZSWIM5	ZSWIM5	blue	blue	0.0889744	0.0194023	0.14132	-0.0214174	-0.0521046	0.0334746	-0.00917889	0.075721
PRDX1	PRDX1	black	black	0.03722	0.0996529	-0.0265882	0.17667	0.221415	-0.015406	0.17805	-0.050673
AKR1A1	AKR1A1	green	green	0.100966	0.166303	-0.0340975	0.146559	0.197289	0.0412547	0.228859	-0.0350882
NASP	NASP	grey	grey	-0.00326176	-0.0810213	0.0212303	-0.0483543	-0.055796	0.0913804	-0.0378516	0.106703
GPBP1L1	GPBP1L1	turquoise	turquoise	0.0662055	-0.0818536	-0.0382	-0.081208	-0.0702476	0.23108	-0.0342929	0.179317
MAST2	MAST2	red	red	0.168957	0.168359	0.184139	0.00114125	-0.00467745	0.0883451	0.0588632	0.132762
PIK3R3	PIK3R3	blue	blue	0.16574	0.257596	0.205047	0.0654091	0.0634177	-0.0294073	0.126823	0.0194563
POMGNT1	POMGNT1	grey	grey	0.0553651	0.0743262	0.0795703	0.0613128	0.0298122	-0.0126781	0.0393924	0.0105259
LRRC41	LRRC41	grey	grey	0.0318839	-0.0310841	0.0146051	-0.0149073	-0.0152107	0.0914938	0.00243395	0.0827318
UQCRH	UQCRH	brown	brown	0.0226467	0.195312	-0.00321413	0.321639	0.346295	-0.108162	0.29675	-0.127935
FAAH	FAAH	blue	blue	0.0979376	0.176626	0.228241	0.0915111	0.0569842	-0.0481496	0.103132	0.0410876
MKNK1	MKNK1	turquoise	turquoise	0.000161744	-0.278804	-0.179456	-0.161167	-0.150295	0.405339	-0.14706	0.317627
ATPAF1	ATPAF1	grey	grey	0.0879891	0.0418305	0.0852128	0.0305615	0.00146589	0.0461931	0.0159934	0.0526485
EFCAB14	EFCAB14	grey	grey	0.0671848	0.00522654	0.0319442	-0.00405759	-0.0242316	0.0769655	-0.00442231	0.0594316
TAL1	TAL1	turquoise	turquoise	-0.0255925	-0.210428	-0.141576	-0.122047	-0.0905585	0.286268	-0.0932306	0.233902
CMPK1	CMPK1	grey	grey	0.0356274	0.028803	0.0250169	0.0920968	0.0695753	0.0114359	0.0572322	0.00573493
SPATA6	SPATA6	turquoise	turquoise	-0.073322	-0.286129	-0.0962481	-0.18028	-0.158011	0.290076	-0.124413	0.28599
AGBL4	AGBL4	blue	blue	0.151669	0.234753	0.513027	0.0328168	-0.0673235	-0.128683	0.0312789	0.104449
ELAVL4	ELAVL4	blue	blue	0.0564812	0.0651291	0.167493	0.106167	0.0232377	-0.0182936	0.0469088	0.0691798
FAF1	FAF1	turquoise	turquoise	0.0669324	-0.12034	0.0829536	-0.150308	-0.166902	0.252257	-0.0991388	0.279165
RNF11	RNF11	brown	brown	0.0118463	-0.0254402	0.0769161	0.157789	0.0356986	-0.0417173	0.0352736	-0.0134823
EPS15	EPS15	turquoise	turquoise	0.0264865	-0.163788	-0.0486001	-0.0754691	-0.0857845	0.25203	-0.0502512	0.209424
OSBPL9	OSBPL9	turquoise	turquoise	0.216354	0.132493	0.0696509	-0.0455163	-0.0210263	0.175248	0.0664759	0.113775
NRDC	NRDC	turquoise	turquoise	0.12559	0.0465556	0.0652903	-0.0217693	-0.0116785	0.178789	0.0347699	0.161072
TXNDC12	TXNDC12	grey	grey	0.0739369	0.0641878	0.022955	0.0151983	0.0324636	0.0562895	0.049818	0.0376068
BTF3L4	BTF3L4	yellow	yellow	0.034725	-0.060927	0.0292915	-0.0133107	-0.0528322	0.0919054	-0.0367878	0.0943366
ZFYVE9	ZFYVE9	blue	blue	0.176012	0.175574	0.224726	0.0368282	0.00428245	0.0328892	0.0682982	0.0851747
PRPF38A	PRPF38A	grey	grey	0.063937	0.0624853	0.034542	0.0157921	0.0258063	0.0417933	0.0456937	0.032083
TUT4	TUT4	turquoise	turquoise	0.148554	0.023018	0.0838448	-0.0867407	-0.0879727	0.206518	-0.00905249	0.193037
ZYG11B	ZYG11B	yellow	yellow	0.129637	0.0495075	0.0911194	0.0824097	-0.000707894	0.0475921	0.0238395	0.0432815
ECHDC2	ECHDC2	grey	grey	-0.0372219	-0.137997	-0.010267	-0.0462057	-0.0623824	0.129725	-0.059535	0.155519
SCP2	SCP2	grey	grey	0.00606692	0.00869074	0.0106426	0.084696	0.0955932	0.0349313	0.0770795	0.0524449
CZIB	CZIB	grey	grey	0.0737176	0.0788793	0.00823118	0.0381555	0.0495882	0.0196567	0.0526956	-0.0122806
LRP8	LRP8	grey	grey	0.0705215	0.0684832	0.151683	0.0217364	-0.0132662	0.0328288	0.0376463	0.102515
YIPF1	YIPF1	turquoise	turquoise	0.112087	0.117251	0.0127205	0.0397068	0.0660048	0.0490017	0.069032	-0.00566032
HSPB11	HSPB11	grey	grey	0.0241973	-0.00534459	0.020482	0.00641315	0.0119774	0.0679482	0.0194663	0.0786731
TMEM59	TMEM59	brown	brown	0.0889056	0.182374	0.0206754	0.194634	0.225721	-0.0292522	0.204237	-0.0709457
SSBP3	SSBP3	blue	blue	0.0479977	-0.014486	0.101772	0.0545554	-0.0144416	0.0408064	0.00147759	0.0856428
TTC4	TTC4	grey	grey	0.179045	0.282238	0.151736	0.0734573	0.0869895	-0.0350898	0.137692	-0.0322291
DHCR24	DHCR24	brown	brown	-0.00164227	-0.0335085	0.0563007	0.116796	0.0262902	-0.038113	0.00264631	0.00122632
USP24	USP24	turquoise	turquoise	0.133929	-0.076909	-0.0234898	-0.118818	-0.116267	0.267782	-0.0763991	0.189401
PLPP3	PLPP3	grey	grey	0.090111	0.206871	0.0481236	0.13975	0.177431	-0.0518155	0.192259	-0.0678664
PRKAA2	PRKAA2	blue	blue	0.0660918	0.0710168	0.218428	0.0700476	-0.0247243	-0.0683239	0.0185643	0.0216044
DAB1	DAB1	blue	blue	0.180028	0.278728	0.490872	0.0607955	-0.0083459	-0.092913	0.0914675	0.107116
MYSM1	MYSM1	yellow	yellow	0.184496	0.122192	0.12499	-0.00577862	-0.0209868	0.0766934	0.0437367	0.0683637
JUN	JUN	grey	grey	-0.0445359	-0.0657181	-0.0332821	0.043969	0.0461895	0.0195917	0.0341904	0.0230221
FGGY	FGGY	turquoise	turquoise	0.117349	0.0195774	0.0336407	-0.0669741	-0.0510553	0.162635	-0.0266554	0.135335
HOOK1	HOOK1	blue	blue	0.11097	0.195171	0.254072	0.0785706	0.0370809	-0.0730497	0.0936687	0.0240922
NFIA	NFIA	turquoise	turquoise	0.282777	0.0458964	-0.0355854	-0.0885289	-0.0699351	0.283964	-0.00856133	0.132781
TM2D1	TM2D1	green	green	0.0792627	0.055001	0.0158875	0.0361108	0.0472081	0.0900963	0.0723645	0.0638483
PATJ	PATJ	blue	blue	0.000305087	-0.0655619	0.103798	-0.0803659	-0.130142	-0.0147786	-0.0904195	0.0413985
USP1	USP1	grey	grey	0.0548245	0.067201	0.0541933	0.0507307	0.0549733	0.0106616	0.0637084	0.0152002
DOCK7	DOCK7	grey	grey	0.187365	0.112987	0.154952	-0.0291099	-0.0554066	0.121024	0.00496593	0.122631
ATG4C	ATG4C	grey	grey	0.060071	-0.0728206	0.030761	-0.0775553	-0.0866934	0.190061	-0.0640893	0.212696
ALG6	ALG6	grey	grey	0.0550677	0.0351369	0.0614806	-0.0111012	-0.0186361	0.0388288	0.00270394	0.0547075
ITGB3BP	ITGB3BP	turquoise	turquoise	0.125935	0.108996	0.0807462	-0.00792097	0.000173874	0.0670873	0.0488375	0.0633222
PGM1	PGM1	grey	grey	0.070274	0.0822239	0.0636512	0.0414921	0.0339081	0.0181726	0.0558397	0.0182723
JAK1	JAK1	turquoise	turquoise	0.0877109	-0.078314	-0.0336529	-0.0608712	-0.0607927	0.212376	-0.0190033	0.144099
DNAJC6	DNAJC6	blue	blue	0.0917221	0.0521526	0.311995	0.0475289	-0.0943555	-0.0831031	-0.0242896	0.0626408
PDE4B	PDE4B	red	red	0.145891	0.0370375	0.231104	-0.117609	-0.129273	0.180997	-0.011861	0.282237
SGIP1	SGIP1	blue	blue	0.229509	0.277132	0.383697	0.0731438	0.0111455	-0.0595944	0.121149	0.0525773
MIER1	MIER1	turquoise	turquoise	0.135804	0.0756246	0.0298004	-0.017982	-0.000460035	0.121881	0.0466906	0.0634644
SLC35D1	SLC35D1	grey	grey	0.0581884	0.0286679	0.0760578	-0.0141594	-0.0221907	0.0552597	0.00781491	0.0830725
SERBP1	SERBP1	green	green	0.144711	0.278068	0.0350553	0.205997	0.253783	-0.0406871	0.306586	-0.106939
GNG12	GNG12	yellow	yellow	0.266686	0.285107	0.112364	0.0617613	0.0755434	0.00723978	0.130471	-0.0542247
WLS	WLS	grey	grey	0.169997	0.106098	0.0399912	0.0139232	0.0119606	0.113805	0.0384671	0.0584188
LRRC7	LRRC7	blue	blue	0.143176	0.196533	0.528361	0.0639204	-0.0702561	-0.131806	0.0309961	0.101746
LRRC40	LRRC40	grey	grey	0.0524334	0.00585107	0.11196	-0.0208903	-0.0513426	0.049842	-0.0186147	0.0977488
SRSF11	SRSF11	yellow	yellow	0.156572	0.061324	0.113945	-0.0285458	-0.0505024	0.0950356	0.00595892	0.093442
ANKRD13C	ANKRD13C	grey	grey	0.0759924	-0.00305666	0.0554296	-0.0124477	-0.0264058	0.100758	0.00420233	0.0936047
ZRANB2	ZRANB2	grey	grey	0.211069	0.276691	0.206687	0.076498	0.0858459	0.0247833	0.152453	0.0531415
NEGR1	NEGR1	blue	blue	0.149665	0.212854	0.506964	0.109668	-0.0464814	-0.175051	0.0381734	0.0480867
SLC44A5	SLC44A5	blue	blue	0.0236882	-0.0256058	0.201672	-0.0130431	-0.0951211	-0.0579226	-0.058501	0.0419035
ACADM	ACADM	grey	grey	0.0391633	-0.00860006	0.0157623	0.019084	0.00234581	0.0542862	0.0024693	0.0495163
RABGGTB	RABGGTB	grey	grey	0.0399241	0.0313316	0.000113048	0.0209294	0.0239862	0.0400937	0.0343312	0.0192627
ST6GALNAC3	ST6GALNAC3	red	red	-0.18174	-0.474743	-0.051847	-0.274908	-0.313319	0.414015	-0.294514	0.574797
ST6GALNAC5	ST6GALNAC5	blue	blue	0.136455	0.179578	0.332321	0.0653077	-0.00824104	-0.0871664	0.0525577	0.0383105
PIGK	PIGK	red	red	0.228604	0.316516	0.286243	0.0598614	0.0437148	-0.00473229	0.137544	0.0678813
AK5	AK5	blue	blue	0.085114	0.039689	0.297473	0.0808631	-0.0403634	-0.0350181	0.0124545	0.0994702
USP33	USP33	grey	grey	0.104724	0.00119644	0.0590636	-0.0272024	-0.045681	0.125891	-0.012344	0.114804
MIGA1	MIGA1	grey	grey	0.0372811	-0.0505216	0.0841697	0.0172542	-0.0389996	0.0771434	-0.0155357	0.11395
FUBP1	FUBP1	grey	grey	0.203602	0.175567	0.120667	-0.00379372	0.0072442	0.127178	0.0822017	0.0953792
DNAJB4	DNAJB4	grey	grey	0.153775	0.288588	0.134121	0.116885	0.140281	-0.0587224	0.172269	-0.0536756
ADGRL2	ADGRL2	blue	blue	0.100419	0.0417319	0.247637	0.028148	-0.0853916	-0.077525	-0.0450574	0.00926642
TTLL7	TTLL7	blue	blue	0.0838551	0.0254791	0.161162	0.0517329	-0.00219815	0.00976671	0.0548926	0.0682593
PRKACB	PRKACB	brown	brown	0.0358032	-0.0757259	0.129601	0.122727	-0.0143146	0.00302531	-0.011071	0.0621956
SPATA1	SPATA1	turquoise	turquoise	0.148403	0.105459	-0.0173971	-0.00515681	0.0277074	0.0860951	0.0490117	-0.00301071
SSX2IP	SSX2IP	brown	brown	0.00888699	-0.0408674	0.0788748	0.0882463	0.000553037	-0.0335605	-0.00735817	0.00524918
C1orf52	C1orf52	grey	grey	0.0126234	-0.0358104	-0.00240106	0.0332072	0.0224063	0.0676829	0.0290812	0.0635237
DDAH1	DDAH1	brown	brown	-0.00111993	-0.0657167	0.069817	0.0622007	-0.00928541	-0.0114656	-0.0103671	0.0341892
ZNHIT6	ZNHIT6	grey	grey	0.0261247	-0.0327099	0.0242584	-0.0371252	-0.0378595	0.0988088	-0.00899656	0.106762
ODF2L	ODF2L	grey	grey	0.0174647	-0.0836313	0.0712869	-0.0380691	-0.0916887	0.0504891	-0.0704794	0.082274
SH3GLB1	SH3GLB1	turquoise	turquoise	0.222505	0.189533	0.00291956	0.0419127	0.080436	0.0984624	0.112682	-0.0232194
SELENOF	SELENOF	grey	grey	0.0247469	0.0778381	-0.00583794	0.117793	0.145318	-0.00291728	0.143516	-0.0221323
HS2ST1	HS2ST1	grey	grey	0.183402	0.194569	0.152274	0.0119535	0.0194502	0.0652236	0.0848147	0.0587738
LMO4	LMO4	brown	brown	0.0574359	0.139072	0.171715	0.31223	0.184123	-0.149448	0.149586	-0.0753823
PKN2	PKN2	turquoise	turquoise	0.0308453	-0.16026	-0.0139073	-0.124797	-0.139288	0.291613	-0.108592	0.305594
GTF2B	GTF2B	green	green	-0.0143222	-0.0672405	-0.0382429	-0.00974799	0.0187768	0.132576	0.0299127	0.116421
KYAT3	KYAT3	turquoise	turquoise	-0.0180506	-0.127319	-0.0374388	-0.0610451	-0.0573299	0.159438	-0.0570039	0.160072
LRRC8B	LRRC8B	blue	blue	0.0688958	-0.0100102	0.172171	0.0383912	-0.0505046	0.0419953	0.00127953	0.109104
LRRC8D	LRRC8D	yellow	yellow	0.284868	0.256317	0.0470545	0.0183859	0.0399099	0.0480205	0.0814191	-0.0748445
ZNF326	ZNF326	turquoise	turquoise	0.100204	0.024315	0.0181668	-0.0307816	-0.0206194	0.10623	0.0130879	0.0606539
ZNF644	ZNF644	turquoise	turquoise	0.0906544	-0.069521	0.0144152	-0.0940467	-0.0889314	0.253411	-0.0394662	0.227622
BRDT	BRDT	grey	grey	0.131496	0.247466	0.195586	0.0720243	0.0738296	-0.0518336	0.111771	0.0128549
EPHX4	EPHX4	blue	blue	0.0556852	0.169895	0.122102	0.134151	0.136644	-0.0820587	0.138062	-0.0432926
BTBD8	BTBD8	brown	brown	0.0378207	-0.0302839	0.0829507	0.107316	0.0165782	0.0171346	0.0139334	0.0551025
GLMN	GLMN	grey	grey	0.0894332	0.0533914	0.10819	-0.0272386	-0.0339063	0.0757618	0.0154408	0.095275
EVI5	EVI5	grey	grey	0.0652697	-0.0539404	0.0728739	-0.0700369	-0.086233	0.197029	-0.0357494	0.225739
DIPK1A	DIPK1A	grey	grey	0.0263022	-0.0386968	0.0625741	-0.027679	-0.0399061	0.0887119	-0.00650395	0.115032
MTF2	MTF2	grey	grey	0.114218	0.0637869	0.123526	-0.0265062	-0.0456318	0.0944852	0.00831971	0.112221
TMED5	TMED5	grey	grey	0.072089	0.040702	-0.013411	0.0159397	0.0415334	0.0847177	0.067868	0.0367214
DR1	DR1	grey	grey	0.0124704	-0.0573586	-0.00334216	0.00326591	-0.0275998	0.0776326	-0.0261078	0.0771943
FNBP1L	FNBP1L	red	red	0.0844317	0.10258	0.160048	0.0284867	0.00602657	0.09143	0.0442296	0.191132
BCAR3	BCAR3	grey	grey	-0.071633	-0.238491	-0.0725688	-0.108359	-0.100673	0.266227	-0.10553	0.29778
DNTTIP2	DNTTIP2	green	green	0.0607026	0.0858257	0.0195602	0.0699698	0.0861769	0.0208447	0.107683	-0.00524379
GCLM	GCLM	grey	grey	0.0673667	0.135249	0.0774489	0.122132	0.118227	-0.0461951	0.13188	-0.0382438
ARHGAP29	ARHGAP29	grey	grey	0.069181	0.0766832	0.0313659	0.0390918	0.0422894	0.00671408	0.0721479	-0.0185329
ABCD3	ABCD3	grey	grey	0.0714715	0.0278909	0.0268229	0.00108457	0.0017383	0.0771775	0.0264748	0.065926
PTBP2	PTBP2	turquoise	turquoise	0.0735563	-0.0772343	0.0492227	-0.0732087	-0.0909142	0.187845	-0.0342998	0.179134
DPYD	DPYD	grey	grey	-0.0400818	-0.248877	0.0408001	-0.165588	-0.195243	0.153243	-0.117216	0.177255
SNX7	SNX7	grey	grey	0.0585063	0.0565585	0.100535	0.00726767	-0.0132565	0.0388317	0.0106763	0.075246
PLPPR5	PLPPR5	blue	blue	0.132007	0.191156	0.259119	0.0706482	0.0183581	-0.0470662	0.074555	0.0398606
PLPPR4	PLPPR4	blue	blue	0.1116	0.184868	0.225983	0.1724	0.0861867	-0.124112	0.116105	-0.0546533
PALMD	PALMD	blue	blue	0.0558636	0.182107	0.114225	0.11937	0.127452	-0.0805839	0.155092	-0.0358726
FRRS1	FRRS1	turquoise	turquoise	0.253421	0.163883	-0.0908495	-0.0366344	0.0104514	0.117913	0.0462809	-0.0892437
AGL	AGL	grey	grey	0.0682561	0.00567743	0.029982	-0.00535226	-0.0238721	0.0687366	-0.00268553	0.0627329
MFSD14A	MFSD14A	yellow	yellow	0.181083	0.233393	0.083735	0.0720076	0.0905027	-0.027381	0.126156	-0.0698239
TRMT13	TRMT13	turquoise	turquoise	0.133067	0.0486356	0.0314456	-0.0305096	-0.0315904	0.114706	0.000821241	0.0759993
DBT	DBT	grey	grey	0.0270851	-0.0272459	0.0223796	0.00763587	-0.0132088	0.0529217	-0.00139881	0.057326
RTCA	RTCA	grey	grey	0.0197403	-0.012388	0.0488829	0.00571462	-0.0120994	0.0525599	0.00503347	0.0757319
CDC14A	CDC14A	turquoise	turquoise	0.0247529	-0.112887	-0.0774695	-0.0980909	-0.0821773	0.181335	-0.0671891	0.130061
EXTL2	EXTL2	grey	grey	0.0114679	-0.0104544	0.0177582	0.0715616	0.0382723	0.0107212	0.0343912	0.0194236
SLC30A7	SLC30A7	turquoise	turquoise	0.080646	-0.0369041	-0.0209555	-0.0682776	-0.0643741	0.147669	-0.0398268	0.0909735
DPH5	DPH5	grey	grey	0.0837537	0.0582152	0.0215304	-0.000393334	0.0139238	0.0497304	0.0328394	0.0279506
OLFM3	OLFM3	blue	blue	0.0410121	-0.0127288	0.219862	0.0440281	-0.0800804	-0.0735291	-0.0673914	0.0377673
RNPC3	RNPC3	turquoise	turquoise	0.120418	0.0454314	0.114117	-0.0615087	-0.0687352	0.123291	-0.0118112	0.135919
AMY2A	AMY2A	grey	grey	0.207328	0.276925	0.1724	0.037256	0.03967	-0.00327697	0.0995708	-0.00527585
NTNG1	NTNG1	blue	blue	0.0885916	0.138642	0.249106	0.0557497	-0.00219379	-0.0794882	0.0515369	0.0337411
VAV3	VAV3	grey	grey	0.0810048	0.0761679	0.0909329	-0.0241574	-0.0324956	0.025774	0.0307397	0.00219055
PRPF38B	PRPF38B	grey	grey	-0.0199447	-0.149583	-0.0379827	-0.100619	-0.122937	0.122956	-0.110049	0.116046
STXBP3	STXBP3	turquoise	turquoise	0.0973528	-0.0385192	-0.0466582	-0.0729192	-0.0614642	0.178793	-0.0201011	0.103321
WDR47	WDR47	blue	blue	0.0755643	0.0790937	0.154137	0.107808	0.033526	-0.0215052	0.05244	0.0446328
SARS1	SARS1	grey	grey	0.0480259	0.121985	0.0729724	0.148319	0.151146	-0.0192311	0.139078	-0.00529681
CELSR2	CELSR2	grey	grey	0.0467714	0.0399083	0.0703168	0.132603	0.0603882	-0.0309334	0.0510666	-0.0170717
SORT1	SORT1	turquoise	turquoise	0.0982313	-0.0423165	0.0395434	-0.035429	-0.0499	0.216631	0.00632228	0.192652
PSMA5	PSMA5	green	green	0.0585506	0.138068	0.0366255	0.119101	0.146538	-0.0261564	0.170388	-0.0338853
GNAI3	GNAI3	grey	grey	-0.0023385	-0.121563	-0.0352565	-0.0772952	-0.0521106	0.202813	-0.0315808	0.182809
AMPD2	AMPD2	grey	grey	0.0147151	-0.0207558	0.0440155	0.0368587	-0.0137744	0.0118851	-0.00371909	0.0315352
GSTM3	GSTM3	brown	brown	0.0273179	0.176319	0.0021025	0.221413	0.265358	-0.0896151	0.231389	-0.10526
AHCYL1	AHCYL1	grey	grey	0.0903392	0.0668523	0.0923784	0.0809949	0.0554995	0.0895489	0.0849242	0.110553
STRIP1	STRIP1	grey	grey	0.0480992	0.0156479	0.034284	0.0211105	-0.00146719	0.0289301	0.0139134	0.0302125
SLC6A17	SLC6A17	brown	brown	0.0948081	0.185165	0.196964	0.206857	0.122696	-0.0970407	0.129694	-0.0285415
LAMTOR5	LAMTOR5	black	black	0.0159627	0.0660672	0.000728549	0.136998	0.158516	-0.0240975	0.127565	-0.0382784
KCNA2	KCNA2	blue	blue	0.0552274	0.112849	0.0882635	0.166656	0.105132	-0.0807428	0.100409	-0.0590495
CD53	CD53	turquoise	turquoise	-0.0535197	-0.270436	-0.166341	-0.151514	-0.120736	0.342606	-0.110777	0.283464
LRIF1	LRIF1	grey	grey	0.153246	0.20438	0.0917235	0.059937	0.0746887	0.000903895	0.100676	-0.0232584
DRAM2	DRAM2	turquoise	turquoise	0.116788	0.0121199	-0.0486421	-0.0503242	-0.0248599	0.179148	-0.0103877	0.0985007
CEPT1	CEPT1	turquoise	turquoise	0.125204	0.0398615	-0.0176549	-0.0266974	-0.013749	0.140172	0.0129454	0.0644416
C1orf162	C1orf162	turquoise	turquoise	0.138421	0.0366659	-0.107026	-0.0465171	9.9501622805086e-05	0.145902	0.0187128	-0.00833017
TMIGD3	TMIGD3	turquoise	turquoise	0.0141197	-0.135885	-0.0905703	-0.0735264	-0.0806871	0.20435	-0.0845016	0.155266
RAP1A	RAP1A	turquoise	turquoise	0.0410683	-0.201561	-0.148851	-0.179032	-0.123291	0.399646	-0.0849076	0.295726
INKA2	INKA2	green	green	0.0572922	0.117425	0.0983708	0.121707	0.110574	-0.00790939	0.154074	0.0240921
KCND3	KCND3	blue	blue	0.198184	0.281607	0.402376	0.0737877	0.0163238	-0.0520578	0.116436	0.0931275
CTTNBP2NL	CTTNBP2NL	turquoise	turquoise	0.201012	-0.0198541	-0.170852	-0.119922	-0.0642987	0.32205	-0.0319206	0.116499
WNT2B	WNT2B	grey	grey	-0.0764357	-0.189004	-0.0712771	-0.108777	-0.105082	0.17121	-0.114405	0.204141
ST7L	ST7L	grey	grey	0.158543	0.12448	0.0982452	-0.00324943	-0.0100969	0.0723392	0.0336697	0.0580409
CAPZA1	CAPZA1	turquoise	turquoise	0.108623	-0.0575888	-0.0494107	-0.10455	-0.0764424	0.267023	-0.0271454	0.169961
LRIG2	LRIG2	grey	grey	0.137717	0.0698594	0.0820356	-0.0262546	-0.0329939	0.107932	0.0140094	0.0885362
MAGI3	MAGI3	blue	blue	0.105959	0.067454	0.178913	-0.00238082	-0.0389613	0.0750178	0.0121567	0.138336
PHTF1	PHTF1	grey	grey	0.121122	0.127521	0.151051	0.0114146	-0.00846168	0.0271372	0.0497216	0.0536081
RSBN1	RSBN1	yellow	yellow	0.169571	0.115751	0.0523001	0.0029674	0.0059814	0.0673062	0.0397726	0.0174849
HIPK1	HIPK1	yellow	yellow	0.107952	0.0455278	0.0543311	0.0472374	0.00396597	0.0490655	0.042034	0.0259069
SYT6	SYT6	red	red	-0.0239143	-0.0819586	0.00853195	-0.073389	-0.0767815	0.130759	-0.065432	0.203414
TRIM33	TRIM33	grey	grey	0.0942196	-0.00665168	0.0710199	-0.0291719	-0.0454386	0.151262	0.00546045	0.148522
BCAS2	BCAS2	green	green	0.0018204	0.0395883	-0.00797535	0.0766895	0.11697	0.0462553	0.150085	0.0285612
NRAS	NRAS	grey	grey	0.0981866	0.122408	0.0335764	0.0486515	0.0504515	0.00115645	0.0814266	-0.0293141
CSDE1	CSDE1	grey	grey	0.0866032	0.0225976	0.0404852	0.0780279	0.0364637	0.0887319	0.0586645	0.0653183
SLC22A15	SLC22A15	grey	grey	0.0206927	-0.0810609	0.0722529	-0.0558293	-0.070664	0.0412637	-0.0315358	0.0747843
ATP1A1	ATP1A1	black	black	0.0242619	0.111462	0.0888857	0.266057	0.234745	-0.0477541	0.179285	-0.013866
MAN1A2	MAN1A2	yellow	yellow	0.226781	0.118468	0.0782561	0.0244363	-0.00666256	0.0840377	0.0316098	0.0116169
GDAP2	GDAP2	turquoise	turquoise	0.0417569	-0.0784562	-0.0174465	-0.0490051	-0.0500118	0.167233	-0.0404423	0.148986
WARS2	WARS2	turquoise	turquoise	0.109991	0.0705803	0.0168813	-0.00918312	-0.00360574	0.0742168	0.0275924	0.0251892
ZNF697	ZNF697	yellow	yellow	0.253642	0.277609	0.160733	0.0522705	0.0509195	-0.00477419	0.106848	-0.0301189
NOTCH2	NOTCH2	turquoise	turquoise	0.144283	-0.00904171	-0.103662	-0.0683737	-0.0386243	0.223321	-0.00778835	0.0562753
SEC22B	SEC22B	grey	grey	0.0768941	0.0446321	0.0387391	0.0411404	0.0269162	0.0418886	0.0421087	0.0262574
RNF115	RNF115	grey	grey	0.0436874	-0.043816	0.0550805	-0.0328362	-0.0550214	0.101483	-0.0158707	0.116318
POLR3C	POLR3C	turquoise	turquoise	0.0591119	0.023454	-0.00771473	-0.0141923	0.0029357	0.0871533	0.0120902	0.0591559
RBM8A	RBM8A	grey	grey	0.0334606	0.0681421	0.00421046	0.0874823	0.104297	-0.0172623	0.0924943	-0.0373878
POLR3GL	POLR3GL	grey	grey	0.137014	0.171878	0.0609207	0.0531214	0.0697673	0.0148808	0.0945539	-0.0268244
TXNIP	TXNIP	turquoise	turquoise	-0.0131561	-0.149392	-0.104346	-0.107002	-0.0856935	0.157786	-0.0561115	0.0875681
PRKAB2	PRKAB2	grey	grey	0.0632181	0.0764142	0.0775206	0.0370836	0.0178242	0.00851976	0.0316909	0.0228073
BCL9	BCL9	yellow	yellow	0.288669	0.258113	0.0632768	0.0309822	0.0504026	0.0366069	0.0929391	-0.0710072
GPR89B	GPR89B	grey	grey	0.078274	0.112913	0.0652336	0.0302031	0.0467525	0.0211321	0.0694647	0.0203763
PDE4DIP	PDE4DIP	blue	blue	0.258383	0.363172	0.326449	0.119188	0.0797242	-0.0476595	0.166631	0.0250775
SV2A	SV2A	brown	brown	0.047589	0.0869458	0.1027	0.204778	0.11378	-0.0922163	0.0867095	-0.0643198
OTUD7B	OTUD7B	grey	grey	0.225965	0.179258	0.102338	-0.0090836	-0.00261698	0.0580264	0.0751278	0.00920555
VPS45	VPS45	grey	grey	0.0105657	-0.102955	0.00249288	-0.0577032	-0.0670003	0.153816	-0.0543154	0.1655
PLEKHO1	PLEKHO1	turquoise	turquoise	0.179217	0.0611742	-0.101099	-0.0355437	0.00250735	0.184446	0.0191779	0.0341823
ANP32E	ANP32E	grey	grey	0.0297648	0.069877	0.00600703	0.10605	0.110407	0.00100578	0.102747	-0.0173956
APH1A	APH1A	grey	grey	0.0505004	0.0595996	0.0359103	0.0364458	0.0247265	-0.00294843	0.0337555	-0.00731005
MRPS21	MRPS21	grey	grey	0.0453622	0.0889987	0.0143814	0.124785	0.123663	-0.0134227	0.107724	-0.0280452
PRPF3	PRPF3	grey	grey	0.0727488	0.0272898	0.0450586	-0.0184783	-0.0214689	0.0688491	0.0146372	0.0649776
MCL1	MCL1	grey	grey	0.0402499	-0.0400302	-0.0734235	-0.0400007	0.00649606	0.171177	0.0459767	0.0783118
ENSA	ENSA	brown	brown	0.0465972	0.0306881	0.0414829	0.135662	0.103303	0.0285745	0.100515	0.0282421
GOLPH3L	GOLPH3L	turquoise	turquoise	0.0869741	0.0310507	0.00152618	-0.0150301	-0.0125794	0.100242	0.00567131	0.0666286
CTSS	CTSS	turquoise	turquoise	0.291386	0.174072	-0.162735	0.00372579	0.0765987	0.189518	0.0887667	-0.0809669
ARNT	ARNT	turquoise	turquoise	0.163644	0.0824035	0.0891961	-0.0499035	-0.0499691	0.147398	0.0146864	0.126417
SETDB1	SETDB1	turquoise	turquoise	0.145831	0.109376	0.0704839	-0.0122564	-0.0074284	0.103498	0.0367692	0.0779747
CDC42SE1	CDC42SE1	turquoise	turquoise	-0.0464168	-0.139447	-0.0816277	-0.0535845	-0.0260579	0.179491	-0.0359738	0.158438
MLLT11	MLLT11	brown	brown	0.0415627	0.136343	0.0266528	0.229319	0.215307	-0.0646962	0.185124	-0.0721191
GABPB2	GABPB2	turquoise	turquoise	0.101586	0.0256094	0.0197887	-0.0520284	-0.0488141	0.0895402	-0.00531656	0.0525696
VPS72	VPS72	yellow	yellow	0.0829639	0.0714311	0.00550488	0.0489517	0.048108	0.0117494	0.0590463	-0.022627
PIP5K1A	PIP5K1A	grey	grey	0.0644405	0.000237546	0.0815445	-0.0628526	-0.0532084	0.152267	-0.00540514	0.176474
PSMD4	PSMD4	black	black	0.0835735	0.214048	0.0522326	0.178883	0.241384	-0.0512544	0.217497	-0.0647805
PI4KB	PI4KB	yellow	yellow	0.152741	0.0680896	0.0456045	-0.0222998	-0.0308326	0.0970981	0.0101681	0.0522287
PSMB4	PSMB4	black	black	0.0236367	0.197069	0.00328661	0.243766	0.323002	-0.099446	0.263254	-0.114562
POGZ	POGZ	grey	grey	0.0254587	-0.189394	0.0103162	-0.121818	-0.148258	0.214422	-0.1107	0.222054
SNX27	SNX27	grey	grey	0.0563752	-0.0280929	0.0346801	-0.00427178	-0.0400889	0.106598	-0.0172503	0.114903
CELF3	CELF3	blue	blue	0.140175	0.232248	0.267996	0.119574	0.0446499	-0.0808345	0.098079	0.0149228
S100A6	S100A6	black	black	-0.0242992	0.0365536	-0.0172134	0.110651	0.161664	-0.0228385	0.121239	-0.0311736
S100A1	S100A1	green	green	-0.000109333	0.0465158	-0.00963003	0.12823	0.143099	-0.00752275	0.131082	-0.0121784
CHTOP	CHTOP	grey	grey	0.0571153	0.0725475	0.00935168	0.0567536	0.0672407	0.0275989	0.0679397	-0.00353485
ILF2	ILF2	grey	grey	0.116075	0.188154	0.0987381	0.0770814	0.090795	0.00691154	0.128875	0.0124009
GATAD2B	GATAD2B	turquoise	turquoise	0.139277	0.0611073	0.0572989	-0.0526886	-0.0386343	0.160069	0.0226259	0.127737
DENND4B	DENND4B	grey	grey	-0.00454479	-0.115521	-0.0341023	-0.0292858	-0.0595405	0.126642	-0.0610261	0.117061
TPM3	TPM3	turquoise	turquoise	0.144032	0.112199	-0.0187758	0.0642932	0.105225	0.127545	0.130088	0.0307243
C1orf43	C1orf43	grey	grey	0.0820292	0.0619831	0.0139399	0.0399197	0.0530693	0.0742067	0.0617858	0.0396602
UBAP2L	UBAP2L	turquoise	turquoise	0.188264	0.172615	0.0504526	0.0369751	0.0637808	0.100568	0.116129	0.0270551
IL6R	IL6R	turquoise	turquoise	0.155728	-0.0376867	-0.165618	-0.118703	-0.0719209	0.26411	-0.0641958	0.0842061
UBE2Q1	UBE2Q1	brown	brown	0.0300315	0.0301003	0.0328396	0.105235	0.0525762	-0.0336128	0.0453218	-0.0278962
ADAR	ADAR	grey	grey	0.0525872	0.00789656	0.0965275	0.0137947	-0.0205428	0.0931736	0.012176	0.121235
PMVK	PMVK	grey	grey	0.0129544	0.0508625	-0.000571624	0.109972	0.111067	-0.0141687	0.10001	-0.0202777
ADAM15	ADAM15	grey	grey	0.121738	0.143937	0.0466429	0.0512418	0.0615566	0.00606158	0.0849929	-0.0326873
SLC50A1	SLC50A1	grey	grey	0.13737	0.220653	0.0912164	0.0844301	0.108824	-0.0218777	0.139641	-0.0307178
DPM3	DPM3	grey	grey	0.036491	0.126243	0.00265078	0.133795	0.165842	-0.0406517	0.144986	-0.0628784
KRTCAP2	KRTCAP2	grey	grey	0.0511156	0.205151	0.0281882	0.17261	0.216593	-0.0936471	0.211421	-0.106715
TRIM46	TRIM46	grey	grey	0.116496	0.220951	0.202273	0.0830718	0.0727803	-0.0508957	0.119584	0.0176073
FDPS	FDPS	brown	brown	0.0163787	0.0610474	0.0128343	0.13291	0.129649	-0.0202798	0.107824	-0.0202149
RUSC1	RUSC1	brown	brown	0.0281582	0.058162	0.0649092	0.139303	0.0907862	-0.0335067	0.075031	-0.00560497
ASH1L	ASH1L	turquoise	turquoise	0.091952	-0.104491	0.00934895	-0.0886784	-0.107216	0.26687	-0.066246	0.232514
DAP3	DAP3	grey	grey	0.0109347	-0.0338253	-0.000231669	0.0168537	0.0187641	0.102478	0.0225238	0.110494
GON4L	GON4L	turquoise	turquoise	0.102405	0.0747531	0.0695635	-0.0174558	0.000759888	0.0991252	0.0416472	0.0916049
SYT11	SYT11	brown	brown	0.0882264	0.164205	0.112723	0.289597	0.219296	-0.0867468	0.188297	-0.0692741
KHDC4	KHDC4	grey	grey	0.132562	0.110972	0.0802168	-0.00444443	-0.00339797	0.0830214	0.0491132	0.0606174
ARHGEF2	ARHGEF2	turquoise	turquoise	0.118072	0.0541978	0.0272038	-0.0163844	-0.0151195	0.114723	0.0168347	0.0796644
SSR2	SSR2	green	green	-0.000574404	0.0613302	-0.00965366	0.0997151	0.138906	-0.00164282	0.133654	-0.0104063
UBQLN4	UBQLN4	grey	grey	0.0378	0.0486388	0.0431112	0.0603064	0.0274586	-0.0154012	0.0291332	-0.00570691
LAMTOR2	LAMTOR2	brown	brown	0.072419	0.191511	0.0193522	0.183546	0.212491	-0.0750473	0.181758	-0.105617
LMNA	LMNA	green	green	0.0701624	0.157743	0.100448	0.114591	0.126422	-0.039994	0.172165	-0.0133328
SLC25A44	SLC25A44	grey	grey	0.0352126	0.0645399	0.0513125	0.084071	0.0704748	-0.0120831	0.0706457	0.00482397
SMG5	SMG5	grey	grey	0.097041	0.0810135	0.0936927	0.00818414	-0.000744087	0.0488427	0.052914	0.0576919
CCT3	CCT3	black	black	0.0393113	0.0940447	0.0172228	0.12337	0.161043	0.0106856	0.128388	0.00190711
MEF2D	MEF2D	yellow	yellow	0.133187	0.0575313	0.0512773	0.053577	0.0115477	0.0873186	0.0535988	0.0401389
NAXE	NAXE	grey	grey	0.0519855	0.114078	0.0151107	0.110321	0.123908	-0.0326951	0.114523	-0.052272
BCAN	BCAN	grey	grey	0.0529971	0.0787347	0.0558317	0.101997	0.0869097	-0.0132289	0.0932585	-0.00687269
MRPL24	MRPL24	grey	grey	0.0849755	0.135423	0.0240196	0.106705	0.122056	-0.0159014	0.125215	-0.0519155
HDGF	HDGF	grey	grey	0.072577	0.175746	0.0819163	0.151881	0.16082	-0.0417004	0.165626	-0.0356267
PRCC	PRCC	grey	grey	0.0421269	-0.0278586	0.0267661	-0.00567418	-0.029231	0.0767721	-0.0152008	0.0766127
ARHGEF11	ARHGEF11	grey	grey	0.151088	0.0619666	0.109869	-0.031599	-0.0576175	0.135487	-0.00368947	0.139314
FCRL2	FCRL2	turquoise	turquoise	0.390988	0.31149	-0.10315	0.0174725	0.0836854	0.0879848	0.116843	-0.210345
IFI16	IFI16	turquoise	turquoise	-0.148107	-0.372845	-0.161585	-0.186112	-0.179853	0.336229	-0.185916	0.346703
AIM2	AIM2	turquoise	turquoise	0.331081	0.279297	-0.0130461	-0.00297981	0.0406505	0.0731326	0.0850237	-0.127502
CADM3	CADM3	brown	brown	0.0369692	0.0712706	0.116239	0.176998	0.0909725	-0.0755082	0.0684728	-0.02965
KCNJ9	KCNJ9	brown	brown	0.0657094	0.13881	0.105865	0.15566	0.118251	-0.058694	0.113926	-0.0220335
IGSF8	IGSF8	brown	brown	0.0717883	0.163158	0.0644951	0.177259	0.171317	-0.0750404	0.164398	-0.0700673
ATP1A2	ATP1A2	grey	grey	0.0594199	0.174391	0.0321022	0.219927	0.24915	-0.0501486	0.232258	-0.0655491
PEA15	PEA15	brown	brown	0.00226466	-0.0143119	0.0479164	0.18015	0.0791525	-0.0357569	0.057465	-0.00710468
DCAF8	DCAF8	yellow	yellow	0.250318	0.28169	0.108111	0.078235	0.0894812	-0.00835633	0.137314	-0.0647385
COPA	COPA	turquoise	turquoise	0.0262944	-0.102351	-0.00861966	-0.051632	-0.0436247	0.228566	0.00942641	0.203331
NCSTN	NCSTN	yellow	yellow	0.117557	0.0836251	0.0326586	0.021785	0.000712818	0.00798575	0.0280299	-0.0274889
CD84	CD84	turquoise	turquoise	0.191071	0.0203476	-0.162857	-0.0986225	-0.034503	0.265455	-0.0168934	0.0626443
F11R	F11R	turquoise	turquoise	0.29834	0.232739	-0.0818152	0.00983319	0.0676741	0.0814939	0.0926634	-0.149823
ARHGAP30	ARHGAP30	turquoise	turquoise	0.136918	0.0172404	-0.106289	-0.0678155	-0.0305681	0.183082	-0.0127995	0.0271627
PFDN2	PFDN2	brown	brown	0.0130108	0.0879957	0.00613614	0.19513	0.187854	-0.0469086	0.167597	-0.0535022
NIT1	NIT1	grey	grey	0.114651	0.152727	0.0592051	0.0616353	0.080445	0.0300792	0.105155	0.00684135
UFC1	UFC1	black	black	0.0413727	0.146705	0.0318418	0.163011	0.207274	-0.0504789	0.176669	-0.0444748
NDUFS2	NDUFS2	brown	brown	0.0165559	0.054581	0.0134682	0.141946	0.139426	0.00152234	0.12954	0.000620664
FCER1G	FCER1G	turquoise	turquoise	0.191423	0.128922	-0.101853	0.031051	0.096326	0.135913	0.113573	-0.0487636
SDHC	SDHC	grey	grey	0.0124685	-0.0571345	0.0241353	0.0322109	-0.00470314	0.0514005	-0.00545345	0.071942
FCGR2A	FCGR2A	turquoise	turquoise	0.0978431	-0.017713	-0.115706	-0.0566538	-0.00458576	0.21629	0.0250363	0.0680839
DUSP12	DUSP12	grey	grey	0.143515	0.151598	0.0408971	0.0233837	0.0439161	0.0385932	0.0776716	-0.00575893
ATF6	ATF6	turquoise	turquoise	0.0240055	-0.148747	-0.02236	-0.135542	-0.104967	0.361044	-0.0468135	0.340661
NOS1AP	NOS1AP	yellow	yellow	0.266796	0.408859	0.253512	0.150178	0.170889	-0.0436328	0.230243	-0.0358506
UHMK1	UHMK1	grey	grey	0.021573	-0.0241821	0.0443999	0.1039	0.0350664	0.0159973	0.0178105	0.0302289
UAP1	UAP1	grey	grey	0.0427608	0.0731707	0.032304	0.0497714	0.0576947	0.00263429	0.0760882	-0.0033807
RGS4	RGS4	brown	brown	-0.0203572	-0.0617157	0.0433192	0.210542	0.070914	-0.0323162	0.0298796	0.00889689
RGS5	RGS5	grey	grey	-0.0133077	-0.0284663	-0.0200921	0.0663831	0.065413	0.0136569	0.0568268	0.00668885
PBX1	PBX1	blue	blue	0.292754	0.348483	0.406604	0.104435	0.027178	-0.0544374	0.133956	0.0478724
MGST3	MGST3	green	green	-0.0241448	-0.00597522	-0.0242843	0.119468	0.150676	0.0516744	0.12033	0.0551663
TMCO1	TMCO1	grey	grey	0.0485809	0.0955731	0.0132271	0.105233	0.115299	-0.0135378	0.0967057	-0.0359625
UCK2	UCK2	red	red	0.017256	-0.0198165	0.0812522	-0.0311553	-0.0469401	0.0992702	-0.00881147	0.164206
FAM78B	FAM78B	blue	blue	0.109965	0.158766	0.217114	0.0427525	0.0184881	-0.0329096	0.062021	0.0474146
POGK	POGK	turquoise	turquoise	0.0495424	0.0145993	0.00869335	0.0121106	0.0164228	0.0790954	0.0285408	0.0630962
ILDR2	ILDR2	blue	blue	0.168455	0.264505	0.228145	0.118752	0.091758	-0.0650207	0.139318	-0.014525
POU2F1	POU2F1	turquoise	turquoise	0.0866573	-0.113419	0.0454008	-0.125035	-0.143256	0.240597	-0.0855212	0.231997
CREG1	CREG1	turquoise	turquoise	-0.0103776	-0.107261	-0.0646314	-0.0276952	-0.0122208	0.170931	-0.0169886	0.146727
RCSD1	RCSD1	turquoise	turquoise	0.0734235	-0.133027	-0.183416	-0.112794	-0.0743014	0.321156	-0.0930978	0.19301
MPZL1	MPZL1	grey	grey	-0.0516245	-0.180997	-0.0562895	-0.0878985	-0.0950043	0.203344	-0.09565	0.239202
MPC2	MPC2	brown	brown	0.0560316	0.224957	0.0422788	0.268225	0.291042	-0.10308	0.26604	-0.113005
DCAF6	DCAF6	grey	grey	0.0451465	-0.0703197	0.131387	-0.0560521	-0.117598	0.149378	-0.0664926	0.217085
TIPRL	TIPRL	grey	grey	0.070109	0.0726589	0.0391462	0.0731318	0.0689907	0.0217191	0.0758821	0.00737782
SFT2D2	SFT2D2	turquoise	turquoise	0.00451095	-0.129294	-0.094577	-0.0892939	-0.0766163	0.193227	-0.0680094	0.136166
ATP1B1	ATP1B1	brown	brown	0.0515754	0.153712	0.0859458	0.416186	0.304519	-0.166398	0.232493	-0.149015
NME7	NME7	grey	grey	0.140163	0.287926	0.135166	0.188051	0.208646	-0.0924177	0.199902	-0.0979418
BLZF1	BLZF1	grey	grey	0.0588904	0.0253433	0.0348463	0.00612278	0.000304732	0.053597	0.0215111	0.0528623
SCYL3	SCYL3	grey	grey	0.0678502	0.042262	0.039951	0.00139059	-0.00696188	0.0526983	0.0208314	0.0455162
KIFAP3	KIFAP3	brown	brown	0.115803	0.249037	0.164392	0.224593	0.206743	-0.102282	0.201742	-0.0651322
PRRC2C	PRRC2C	grey	grey	0.0163353	-0.0790065	0.0159427	-0.105296	-0.103643	0.144615	-0.0388744	0.135478
VAMP4	VAMP4	yellow	yellow	0.197118	0.204482	0.0935296	0.10027	0.0857119	-0.00151037	0.120836	-0.038507
DNM3	DNM3	blue	blue	0.105048	0.0126296	0.240628	-0.00146771	-0.0703571	0.0337609	0.00845513	0.140413
SUCO	SUCO	turquoise	turquoise	0.0425143	-0.0578399	-0.0235128	-0.0528261	-0.0258982	0.170964	0.00322781	0.125383
PRDX6	PRDX6	grey	grey	0.0591673	0.139042	0.0254777	0.161805	0.189595	-0.00357236	0.190616	-0.0224412
KLHL20	KLHL20	grey	grey	0.0311985	-0.0656698	0.00826551	-0.043816	-0.0566005	0.106455	-0.0314221	0.100162
ZBTB37	ZBTB37	turquoise	turquoise	0.0745952	-0.00977225	-0.0184249	-0.0477128	-0.0334993	0.134978	-0.016703	0.0895451
RC3H1	RC3H1	turquoise	turquoise	0.0917397	-0.0394851	0.0185429	-0.0663231	-0.0638813	0.201112	-0.0179087	0.170575
RABGAP1L	RABGAP1L	red	red	0.0328382	-0.0983104	0.175457	-0.119953	-0.179887	0.195408	-0.0972693	0.330949
CACYBP	CACYBP	black	black	0.00749028	0.107697	-0.000451928	0.173033	0.216369	-0.0524133	0.177517	-0.0573704
MRPS14	MRPS14	green	green	0.0505551	0.185926	0.0197553	0.184963	0.233504	-0.0689459	0.249594	-0.0841447
TNR	TNR	blue	blue	0.194692	0.298555	0.462954	0.091541	0.0126178	-0.102682	0.110269	0.080882
COP1	COP1	turquoise	turquoise	0.0416211	-0.184977	0.00955417	-0.148969	-0.167867	0.28467	-0.119499	0.27753
ASTN1	ASTN1	blue	blue	0.150989	0.191535	0.361362	0.0543067	-0.0178657	-0.0244349	0.0600315	0.12777
BRINP2	BRINP2	blue	blue	0.110517	0.172814	0.275629	0.066783	0.0236979	-0.0340384	0.0720156	0.0827962
RASAL2	RASAL2	red	red	0.0899897	-0.0262695	0.196862	-0.0753664	-0.13774	0.188705	-0.0711724	0.32244
RALGPS2	RALGPS2	turquoise	turquoise	0.113768	0.0278559	0.0630053	-0.043993	-0.0386092	0.184926	0.0165958	0.161768
FAM20B	FAM20B	grey	grey	0.0649237	-0.00530334	0.0477429	0.0256248	-0.0127064	0.0742314	0.00433037	0.0794954
ABL2	ABL2	turquoise	turquoise	0.0944546	-0.0235528	0.0470305	-0.0852808	-0.078173	0.218328	-0.00591818	0.198823
SOAT1	SOAT1	turquoise	turquoise	0.00426886	-0.157702	-0.100519	-0.102997	-0.0706992	0.295936	-0.0312091	0.225524
TOR1AIP2	TOR1AIP2	grey	grey	0.112285	0.06964	0.0578583	0.00745425	-0.00259267	0.0811337	0.0334102	0.0613644
TOR1AIP1	TOR1AIP1	turquoise	turquoise	0.181854	0.115962	-0.027217	0.00310535	0.0272886	0.10145	0.0580398	-0.0121173
CEP350	CEP350	turquoise	turquoise	0.0296374	-0.159778	0.0029699	-0.135983	-0.139389	0.257236	-0.0741338	0.243647
QSOX1	QSOX1	grey	grey	-0.00997134	-0.0728061	0.0072458	-0.0251709	-0.0465555	0.0776002	-0.0327022	0.0947397
XPR1	XPR1	turquoise	turquoise	0.108962	-0.0248937	0.0519658	-0.0710122	-0.0759803	0.202	-0.0160286	0.183606
STX6	STX6	grey	grey	0.10496	0.0874716	0.0648587	-0.00698243	0.0111934	0.111197	0.0636963	0.102624
IER5	IER5	green	green	0.0535789	0.155322	0.00287233	0.158985	0.19565	-0.0390286	0.230028	-0.0736309
CACNA1E	CACNA1E	blue	blue	0.1833	0.350926	0.442483	0.156378	0.0786495	-0.13742	0.162191	0.0382131
GLUL	GLUL	green	green	0.0231322	-0.00430892	-0.0525355	0.0874731	0.121275	0.106815	0.140188	0.0560845
NPL	NPL	turquoise	turquoise	-0.058529	-0.317208	-0.181822	-0.175735	-0.146691	0.408915	-0.12925	0.342543
DHX9	DHX9	turquoise	turquoise	0.0931626	-0.0258062	-0.0271596	-0.0395196	-0.0254586	0.187597	0.00308619	0.108146
LAMC1	LAMC1	blue	blue	0.115142	0.135513	0.144812	0.0103642	-0.00808933	-0.00966596	0.0434861	0.0167769
NMNAT2	NMNAT2	blue	blue	0.0966696	0.129887	0.296783	0.0981122	0.0121914	-0.0472364	0.0584669	0.0748371
SMG7	SMG7	grey	grey	0.0751306	-0.0229633	0.074506	-0.0109726	-0.0581009	0.109258	-0.0265762	0.119945
NCF2	NCF2	turquoise	turquoise	0.202349	0.0955047	-0.0948355	-0.04364	0.00538989	0.158981	0.0380067	-0.0289101
ARPC5	ARPC5	grey	grey	0.0206534	0.0215357	-0.00296892	0.0609811	0.0591153	0.021519	0.0670934	0.00272634
RGL1	RGL1	turquoise	turquoise	0.0801086	-0.118354	0.0231094	-0.103112	-0.0920364	0.288187	-0.00637459	0.216419
COLGALT2	COLGALT2	grey	grey	0.0226944	-0.102328	0.0494644	-0.0308645	-0.0610177	0.0682169	-0.0341784	0.0871582
TSEN15	TSEN15	grey	grey	0.0247767	-0.0059967	0.0163823	0.0139727	0.0099125	0.0524916	0.0205274	0.0561185
C1orf21	C1orf21	blue	blue	0.121155	0.150278	0.246419	0.0776345	0.0253734	-0.0526776	0.0709685	0.0218434
EDEM3	EDEM3	grey	grey	0.0569444	-0.0315443	0.0461777	-0.0216519	-0.0527311	0.124103	-0.0196717	0.132968
RNF2	RNF2	turquoise	turquoise	0.109535	0.0403714	0.00918109	-0.0282058	-0.0222756	0.109266	0.00556959	0.0615465
TRMT1L	TRMT1L	yellow	yellow	0.179363	0.147241	0.0875804	0.00707493	0.00245452	0.0567792	0.0487309	0.0255908
SWT1	SWT1	turquoise	turquoise	0.193301	0.18108	0.070552	0.0128967	0.038567	0.0683906	0.0833899	0.0173618
IVNS1ABP	IVNS1ABP	turquoise	turquoise	0.288048	0.146322	-0.114063	-0.0326458	0.0291039	0.207157	0.080847	-0.0445557
TPR	TPR	green	green	0.175941	0.236822	0.0668233	0.0736762	0.118651	0.0333777	0.203843	-0.0183641
ODR4	ODR4	grey	grey	0.0352304	-0.00437359	0.00754648	0.016123	0.0190334	0.070631	0.0344759	0.056589
PLA2G4A	PLA2G4A	turquoise	turquoise	0.0520386	-0.179651	-0.209091	-0.167064	-0.10889	0.395896	-0.0848657	0.238877
BRINP3	BRINP3	blue	blue	0.112388	0.119277	0.253572	0.0215909	-0.0354472	-0.0460023	0.0226062	0.0425339
RGS1	RGS1	grey	grey	-0.167849	-0.365644	-0.175588	-0.210411	-0.148019	0.343639	-0.115894	0.322715
RGS2	RGS2	grey	grey	0.0749253	0.0505663	-0.042985	0.0229048	0.0549899	0.0578022	0.0664992	-0.0324252
UCHL5	UCHL5	grey	grey	0.0478779	0.0101696	0.0267133	0.0554048	0.0439735	0.0434911	0.0349614	0.0366896
RO60	RO60	grey	grey	0.0681266	0.0756095	0.0941977	0.0325924	0.0158618	0.0349902	0.0506789	0.061762
GLRX2	GLRX2	grey	grey	0.070613	0.193569	0.0638914	0.168508	0.181089	-0.0652299	0.188861	-0.063939
CDC73	CDC73	turquoise	turquoise	0.0681179	-0.0373577	0.0356969	-0.0673524	-0.0653286	0.179029	-0.0209241	0.166452
B3GALT2	B3GALT2	grey	grey	0.0847222	0.194081	0.088346	0.128232	0.128454	-0.0680316	0.135802	-0.0623951
KCNT2	KCNT2	blue	blue	0.152792	0.241904	0.391339	0.0779876	-0.00822097	-0.0981963	0.0700426	0.0579476
CFH	CFH	turquoise	turquoise	0.412575	0.319003	-0.115811	0.00114821	0.0717799	0.105837	0.101147	-0.21164
ZBTB41	ZBTB41	yellow	yellow	0.0116996	-0.068581	0.0314645	-0.0110657	-0.0626789	0.027077	-0.0557351	0.0388319
DENND1B	DENND1B	yellow	yellow	0.211567	0.156876	0.114008	-0.0186439	-0.0248419	0.0687407	0.0368972	0.0293637
NEK7	NEK7	turquoise	turquoise	0.209731	0.00835375	-0.128617	-0.0932795	-0.0509983	0.25529	-0.019963	0.0587232
PTPRC	PTPRC	turquoise	turquoise	0.191767	0.0150233	-0.186644	-0.11909	-0.0523114	0.273956	-0.0171759	0.0281925
CAMSAP2	CAMSAP2	red	red	-0.00197713	-0.163386	0.0697216	-0.0332289	-0.12333	0.122221	-0.106828	0.178311
KIF21B	KIF21B	turquoise	turquoise	0.173209	0.0926207	0.0013807	-0.0201958	-0.0130502	0.132383	0.0196693	0.0369356
TMEM9	TMEM9	brown	brown	0.0218555	0.0264409	0.0691674	0.0809076	0.023344	-0.0406045	0.0174814	-0.0194324
CSRP1	CSRP1	grey	grey	0.0611125	0.0590478	0.0288046	0.0839784	0.0772583	0.0177946	0.0913744	0.0177313
NAV1	NAV1	grey	grey	0.163074	0.115359	0.157989	0.0166025	-0.00665348	0.0481874	0.0585039	0.0708668
IPO9	IPO9	grey	grey	0.0532564	-0.0215035	0.0333615	-0.0114196	-0.0224565	0.112492	-0.0033491	0.116471
SHISA4	SHISA4	brown	brown	0.116925	0.264045	0.156708	0.182768	0.166597	-0.0927236	0.195218	-0.049571
TIMM17A	TIMM17A	grey	grey	0.0471071	0.115399	0.023355	0.134159	0.151283	-0.00967789	0.149852	-0.0211218
RNPEP	RNPEP	turquoise	turquoise	0.199664	0.164165	0.0151744	0.0137361	0.038593	0.0848782	0.0712861	-0.0131463
ARL8A	ARL8A	brown	brown	0.0699645	0.0603319	0.0525607	0.133921	0.0682948	-0.025079	0.0676411	-0.0251998
PPP1R12B	PPP1R12B	grey	grey	0.178168	0.10581	0.201338	-0.0321664	-0.0424638	0.125617	0.0321289	0.164418
KDM5B	KDM5B	grey	grey	0.126578	0.11772	0.132333	0.0473665	0.0227934	0.0421637	0.0680716	0.0583062
KLHL12	KLHL12	grey	grey	0.108938	0.0973424	0.0970733	0.0176736	0.00154579	0.0489247	0.037393	0.064026
ADIPOR1	ADIPOR1	grey	grey	0.0812018	0.0615722	0.00546122	0.0328708	0.0400208	0.0520674	0.0540897	0.00968263
TMEM183A	TMEM183A	grey	grey	0.0648569	0.0690782	0.0390293	0.0669401	0.05517	0.00903371	0.0563917	0.0029237
PPFIA4	PPFIA4	yellow	yellow	0.159673	0.0824421	0.00906822	0.00712875	-0.002523	0.0440684	0.0164062	-0.0387301
ADORA1	ADORA1	blue	blue	0.0408477	0.0712999	0.0717123	0.0935887	0.0745291	-0.0202767	0.0735163	0.00687512
BTG2	BTG2	turquoise	turquoise	-0.00248596	-0.093227	-0.0914296	-0.0795303	-0.0345643	0.183785	-0.00448153	0.122471
ATP2B4	ATP2B4	blue	blue	0.0145321	0.00114794	0.111026	0.0799216	0.0106946	0.00380066	0.0366091	0.0652586
SNRPE	SNRPE	grey	grey	0.0429665	0.149979	0.000702345	0.144548	0.185095	-0.0600948	0.167262	-0.0818233
PLEKHA6	PLEKHA6	blue	blue	0.123639	0.146914	0.294253	0.0384792	-0.0218626	-0.0238518	0.0410639	0.104159
PIK3C2B	PIK3C2B	grey	grey	0.0467506	-0.0658758	0.0228667	-0.083102	-0.0741668	0.148571	-0.0371217	0.168211
MDM4	MDM4	yellow	yellow	0.121643	-0.0260482	0.0216179	-0.102194	-0.110095	0.168309	-0.0571052	0.135018
LRRN2	LRRN2	blue	blue	0.116933	0.204687	0.226431	0.102987	0.0746455	-0.0719771	0.119098	0.00508511
NFASC	NFASC	blue	blue	0.180685	0.174291	0.297433	0.0320178	-0.0201267	0.00570241	0.0763449	0.101635
CNTN2	CNTN2	grey	grey	0.0547896	-0.00167125	0.0336517	-0.0171685	-0.0205995	0.0487071	0.0176176	0.0544873
RBBP5	RBBP5	grey	grey	0.0459604	0.0219549	0.0475717	0.00668784	-0.0068338	0.0474832	0.00367459	0.0588796
DSTYK	DSTYK	grey	grey	0.135776	0.128081	0.0938428	0.0327349	0.029288	0.0561796	0.0636207	0.0481045
TMCC2	TMCC2	blue	blue	0.0432144	0.0477214	0.0469981	0.111643	0.0766173	-0.0111165	0.0837566	0.00175024
CDK18	CDK18	grey	grey	0.00461893	-0.116604	-0.00447378	-0.0377889	-0.0563322	0.103435	-0.041585	0.118166
MFSD4A	MFSD4A	grey	grey	0.113427	0.132871	0.128477	0.101452	0.0560579	-0.0283771	0.0808017	-0.00767173
ELK4	ELK4	turquoise	turquoise	0.064243	-0.00328377	-0.0154902	-0.0421884	-0.0454643	0.109444	-0.0165127	0.0736262
NUCKS1	NUCKS1	brown	brown	-0.0399704	-0.102705	0.0367001	0.121781	0.0220417	-0.00288523	0.00731671	0.0402081
SRGAP2	SRGAP2	turquoise	turquoise	0.288719	-0.105702	-0.255544	-0.23456	-0.175016	0.556781	-0.14015	0.276671
RASSF5	RASSF5	grey	grey	-0.0154063	-0.128492	-0.0504141	-0.0642094	-0.044925	0.192284	-0.0116687	0.162648
EIF2D	EIF2D	grey	grey	0.0854906	0.0955579	0.0857587	0.00642679	0.0112437	0.0372181	0.0511945	0.0490931
MAPKAPK2	MAPKAPK2	turquoise	turquoise	0.0184962	-0.068576	-0.0460121	-0.0717631	-0.0418059	0.159482	-0.0106123	0.112959
PFKFB2	PFKFB2	grey	grey	0.0501039	-0.0155652	0.0551248	-0.00540416	-0.0322388	0.0542337	-0.0166161	0.0699119
CD55	CD55	grey	grey	-0.0859171	-0.229142	-0.0845861	-0.11585	-0.0876385	0.209013	-0.0474219	0.178994
CR1L	CR1L	turquoise	turquoise	0.21716	0.259006	0.0658606	0.0378713	0.0628133	0.0105451	0.110323	-0.0690943
CD46	CD46	red	red	0.0726345	-0.00737471	0.116999	-0.0425197	-0.0692821	0.107134	-0.0188142	0.163004
PLXNA2	PLXNA2	red	red	0.106653	0.143695	0.256624	0.0727685	0.0286943	0.0308773	0.0848475	0.155706
TRAF3IP3	TRAF3IP3	turquoise	turquoise	0.0707495	-0.0638885	-0.121248	-0.0735926	-0.0501558	0.2008	-0.0435584	0.0954063
SYT14	SYT14	blue	blue	0.0421835	0.00912951	0.233104	0.00462578	-0.0743051	-0.0399433	-0.0239065	0.0660479
KCNH1	KCNH1	blue	blue	0.147349	0.256776	0.387438	0.0903632	0.0234028	-0.0946254	0.101298	0.0656009
RCOR3	RCOR3	grey	grey	-0.0083992	-0.1558	0.0289563	-0.0782497	-0.120423	0.144701	-0.0934374	0.181986
TRAF5	TRAF5	turquoise	turquoise	0.159959	0.0744776	-0.0271322	-0.0174414	-0.00594193	0.0923695	0.0242237	-0.0191862
LPGAT1	LPGAT1	grey	grey	0.140093	0.106785	0.116391	0.060241	0.035228	0.0575625	0.0635056	0.0610055
INTS7	INTS7	grey	grey	0.0744457	0.0642122	0.0692269	0.019879	0.0121856	0.0520281	0.0426424	0.0683326
PPP2R5A	PPP2R5A	grey	grey	0.138297	0.130349	0.0542392	0.0332507	0.0575482	0.0752995	0.103301	0.0450446
PACC1	PACC1	turquoise	turquoise	0.0872138	0.0140771	-0.0222101	-0.0287056	-0.0137599	0.111645	0.00660778	0.0500658
NENF	NENF	grey	grey	0.0187994	0.119988	0.00485343	0.171786	0.198849	-0.0599216	0.178607	-0.0651353
NSL1	NSL1	grey	grey	-0.065622	-0.2255	-0.0489087	-0.0948208	-0.118634	0.17263	-0.120821	0.194729
TATDN3	TATDN3	turquoise	turquoise	0.0399882	-0.0483117	0.00444032	-0.0447457	-0.0500568	0.120392	-0.025859	0.111855
FLVCR1	FLVCR1	grey	grey	0.039064	-0.0115688	0.049888	-0.0358763	-0.0485168	0.071186	-0.0221405	0.0891115
ANGEL2	ANGEL2	green	green	0.116444	0.100796	0.0701627	0.0393377	0.044117	0.0664882	0.0804927	0.0552259
SMYD2	SMYD2	grey	grey	0.0259185	5.49020911909655e-05	0.0498143	0.0406378	0.0161521	0.0377144	0.029384	0.0618694
PTPN14	PTPN14	grey	grey	-0.0521375	-0.192624	-0.0568953	-0.0787179	-0.0867224	0.187669	-0.0946402	0.219859
KCNK2	KCNK2	grey	grey	0.12498	0.2613	0.198206	0.10573	0.108473	-0.0673852	0.154178	-0.00832969
KCTD3	KCTD3	grey	grey	0.0674871	0.00473022	0.0820017	-0.0116807	-0.0395793	0.0509561	-0.00578863	0.0665681
ESRRG	ESRRG	blue	blue	0.11008	0.0862975	0.275605	-0.0186523	-0.0713129	0.0290328	-0.00110449	0.155361
GPATCH2	GPATCH2	turquoise	turquoise	0.106185	-0.00966607	0.0486839	-0.0645356	-0.0809772	0.14033	-0.0501394	0.121711
LYPLAL1	LYPLAL1	grey	grey	-0.0387943	-0.19546	-0.0251212	-0.0818032	-0.109529	0.160985	-0.103745	0.188018
EPRS1	EPRS1	grey	grey	0.0923272	0.095941	0.0649506	0.0616212	0.0673184	0.0448638	0.0839377	0.0432476
IARS2	IARS2	grey	grey	0.142124	0.137117	0.0831504	0.0332091	0.0271337	0.050748	0.0619581	0.0346059
RAB3GAP2	RAB3GAP2	grey	grey	0.0568982	-0.0450392	0.0507707	-0.0374389	-0.050871	0.150792	-0.022511	0.166851
MARK1	MARK1	blue	blue	0.0831655	0.0868801	0.249121	0.0649977	-0.00920299	-0.0552321	0.0303	0.0466129
C1orf115	C1orf115	brown	brown	-0.0149937	-0.0853516	0.0469974	0.0935173	-0.0276314	-0.0458362	-0.0484749	-0.00559615
MIA3	MIA3	grey	grey	0.080566	0.0761253	0.0570249	0.0607668	0.0509116	0.0580601	0.0740097	0.0516283
AIDA	AIDA	turquoise	turquoise	0.0117471	-0.0652963	-0.0543712	-0.0295623	-0.0157583	0.164571	-0.014921	0.148734
BROX	BROX	turquoise	turquoise	0.0814493	0.0220971	0.00614225	0.0103536	0.00829726	0.104196	0.0269395	0.0726013
TLR5	TLR5	turquoise	turquoise	-0.0593962	-0.184771	-0.0967296	-0.0960754	-0.0840058	0.204237	-0.0977548	0.200998
SUSD4	SUSD4	blue	blue	0.12718	0.250045	0.302512	0.0924603	0.0562297	-0.0801664	0.116928	0.0316292
CAPN2	CAPN2	green	green	0.0535443	0.0732862	0.0632428	0.054798	0.0651081	0.0225462	0.100191	0.0407362
TP53BP2	TP53BP2	turquoise	turquoise	0.0476891	-0.0626573	-0.0268684	-0.0603741	-0.0519071	0.158561	-0.021584	0.116978
FBXO28	FBXO28	red	red	0.0235536	-0.0453925	0.0138976	-0.0308471	-0.0302873	0.121358	-0.0083471	0.127279
NVL	NVL	grey	grey	0.169006	0.172156	0.166656	-0.0106982	-0.0148425	0.0697146	0.0514694	0.0992409
CNIH4	CNIH4	grey	grey	0.0437807	0.0765087	0.0114151	0.0547648	0.0723576	-0.00100038	0.0832553	-0.0167467
WDR26	WDR26	turquoise	turquoise	0.154626	0.0537507	-0.00587919	-0.0115641	-0.00663145	0.168689	0.0280107	0.0818623
CNIH3	CNIH3	red	red	0.0495215	0.0579706	0.11698	0.0430665	0.0289457	0.0271153	0.0437711	0.0928285
LBR	LBR	grey	grey	0.00761412	-0.0694619	-0.0269845	-0.0602841	-0.0527347	0.114837	-0.0301191	0.107459
ENAH	ENAH	blue	blue	0.162423	0.238537	0.323016	0.0729955	0.0200511	-0.0525998	0.109516	0.0660635
SRP9	SRP9	brown	brown	0.0242725	0.0699136	0.031816	0.160003	0.137469	-0.0583022	0.121815	-0.0562849
TMEM63A	TMEM63A	turquoise	turquoise	0.0835805	-0.0510283	-0.0761345	-0.0870298	-0.0585356	0.164809	-0.0271439	0.0780335
H3-3A	H3-3A	green	green	0.0783786	0.217861	-0.0317829	0.185785	0.277101	-0.0168493	0.312837	-0.0876971
ACBD3	ACBD3	turquoise	turquoise	0.0980771	0.0436075	-0.00749498	0.00889852	0.0249851	0.105711	0.0493271	0.0412443
PARP1	PARP1	grey	grey	0.0501355	0.0244555	0.0271639	0.00923374	0.00460554	0.0662957	0.0142115	0.0647117
STUM	STUM	blue	blue	0.0854368	0.15663	0.147757	0.140492	0.0873131	-0.0855377	0.110542	-0.045873
ITPKB	ITPKB	turquoise	turquoise	0.0727329	-0.107853	-0.110717	-0.108546	-0.0740185	0.251008	-0.0436589	0.1456
CDC42BPA	CDC42BPA	blue	blue	0.185383	0.140763	0.344265	0.0409384	-0.0459157	-0.0152503	0.0472298	0.0983815
SNAP47	SNAP47	black	black	0.0887581	0.30394	0.0717805	0.26305	0.337702	-0.13713	0.292832	-0.149689
ARF1	ARF1	brown	brown	0.0206109	0.0600309	0.00245065	0.211528	0.178881	-0.0255076	0.157486	-0.0411232
C1orf35	C1orf35	grey	grey	0.0705008	0.110427	0.0330768	0.0664911	0.0781604	-0.0125822	0.084229	-0.0304171
MRPL55	MRPL55	brown	brown	0.0192713	0.0836555	0.0112331	0.101559	0.113593	-0.0509245	0.0985581	-0.0528171
GUK1	GUK1	brown	brown	-0.0294361	-0.0460034	0.0245209	0.166915	0.0829519	-0.0470791	0.0565758	-0.0216547
RNF187	RNF187	grey	grey	0.0622423	0.297035	0.0416393	0.278402	0.329753	-0.140189	0.318311	-0.15561
RAB4A	RAB4A	grey	grey	0.00921006	-0.0169199	0.0452949	0.0420273	0.0209469	0.0401025	0.0187813	0.0673384
CCSAP	CCSAP	brown	brown	0.0287252	0.00055124	0.10712	0.0654959	-0.000281254	0.00821177	0.0222318	0.0695013
NUP133	NUP133	grey	grey	0.0191944	-0.0742658	0.0150532	-0.0266888	-0.0479817	0.0968879	-0.0345702	0.105675
ABCB10	ABCB10	grey	grey	0.0418098	0.0191877	0.0392717	0.00394218	0.00549599	0.0674302	0.0195047	0.078471
GALNT2	GALNT2	turquoise	turquoise	-0.115261	-0.364684	-0.124841	-0.183306	-0.174156	0.385257	-0.170356	0.409506
PGBD5	PGBD5	blue	blue	0.0904689	0.0889596	0.20851	0.113322	0.0258512	-0.0363699	0.0565432	0.0390236
COG2	COG2	grey	grey	0.0498033	0.0107353	0.0283896	-0.0170719	-0.0288997	0.0701566	-0.00270042	0.0701227
TTC13	TTC13	turquoise	turquoise	0.0457277	-0.0541377	0.0206199	-0.045471	-0.0517335	0.149689	-0.0285873	0.149298
C1orf131	C1orf131	grey	grey	0.151741	0.184536	0.059027	0.0537612	0.0830693	0.0277138	0.113366	-0.0126632
GNPAT	GNPAT	grey	grey	0.0857579	0.0533314	0.0411346	-0.00172582	0.00521087	0.0970974	0.0238226	0.0901377
EGLN1	EGLN1	grey	grey	0.120907	0.24212	0.0886367	0.143872	0.161991	-0.0528529	0.18801	-0.0692871
DISC1	DISC1	turquoise	turquoise	-0.103184	-0.4241	-0.203547	-0.251565	-0.239405	0.458334	-0.233876	0.422446
SIPA1L2	SIPA1L2	turquoise	turquoise	0.0288868	-0.237288	-0.155532	-0.169108	-0.148319	0.381523	-0.127028	0.282896
NTPCR	NTPCR	turquoise	turquoise	0.228939	0.143016	-0.066405	0.0118566	0.0435565	0.0864336	0.0591156	-0.0855464
PCNX2	PCNX2	red	red	-0.0874638	-0.271541	0.0483512	-0.121266	-0.174399	0.235822	-0.167638	0.387025
KCNK1	KCNK1	brown	brown	0.0123555	0.0305564	0.0696247	0.122422	0.0908675	-0.0340612	0.0724756	0.00560101
SLC35F3	SLC35F3	blue	blue	0.0831619	0.0868169	0.284883	0.00991148	-0.0506273	-0.0433028	0.00567647	0.0828443
TARBP1	TARBP1	red	red	-0.0258293	-0.161913	0.0936047	-0.0651647	-0.145147	0.0475108	-0.127717	0.10726
IRF2BP2	IRF2BP2	grey	grey	0.0325962	-0.0285833	0.00338303	0.0251483	-0.00914665	0.0346469	-0.00213789	0.0218111
TOMM20	TOMM20	brown	brown	0.00276406	0.0269057	0.0521853	0.247484	0.163937	-0.0890271	0.120784	-0.06293
ARID4B	ARID4B	grey	grey	0.0804008	-0.0818319	0.0460868	-0.0992739	-0.0986614	0.217312	-0.0319819	0.215706
GGPS1	GGPS1	grey	grey	0.222297	0.325554	0.104049	0.100958	0.138966	-0.0305192	0.172505	-0.0856391
TBCE	TBCE	grey	grey	0.220701	0.316379	0.210603	0.053328	0.0562185	-0.0226831	0.135126	-0.00593395
LYST	LYST	turquoise	turquoise	0.042104	-0.153953	0.00895801	-0.105258	-0.132468	0.278455	-0.108676	0.284375
GPR137B	GPR137B	turquoise	turquoise	0.0137219	-0.0813214	-0.0313818	-0.0586699	-0.0563644	0.123851	-0.0474957	0.102434
LGALS8	LGALS8	turquoise	turquoise	0.118638	0.0494183	-0.0193176	-0.00204515	0.00699013	0.116388	0.016726	0.0431009
HEATR1	HEATR1	turquoise	turquoise	0.050663	-0.030638	0.0114312	-0.0295877	-0.0310045	0.125638	-0.0127844	0.10621
MTR	MTR	turquoise	turquoise	0.0806457	-0.0790547	-0.031187	-0.0854522	-0.0841801	0.192521	-0.0527469	0.12375
RYR2	RYR2	blue	blue	0.116516	0.193363	0.4681	0.0504059	-0.0564802	-0.119877	0.0417802	0.0923725
CHRM3	CHRM3	blue	blue	0.111809	0.162418	0.447957	0.0494291	-0.0735505	-0.130841	0.00831562	0.0711679
FMN2	FMN2	blue	blue	0.135029	0.1376	0.391223	0.00508585	-0.0804322	-0.0578091	0.00872926	0.104011
RGS7	RGS7	blue	blue	0.144732	0.174945	0.489648	0.0138477	-0.119437	-0.143538	-0.0207051	0.0626278
FH	FH	green	green	0.0460844	0.121027	0.019358	0.109239	0.137803	-0.0317601	0.154088	-0.0419615
PLD5	PLD5	blue	blue	0.0287045	-0.0541071	0.101925	-0.0325664	-0.0754016	0.0199023	-0.0377482	0.0626623
SDCCAG8	SDCCAG8	turquoise	turquoise	0.35752	0.403557	0.140215	0.0436748	0.072113	0.0197303	0.15344	-0.0921319
AKT3	AKT3	blue	blue	0.324514	0.529231	0.387462	0.133324	0.120506	-0.085198	0.239987	-0.00869648
ZBTB18	ZBTB18	brown	brown	0.0384719	-0.0208436	0.0882925	0.18875	0.0275139	-0.0878464	0.00877094	-0.0599901
ADSS2	ADSS2	green	green	0.0747648	0.0787205	0.0733977	0.0225371	0.0354128	0.0394817	0.0771072	0.045855
DESI2	DESI2	grey	grey	0.228589	0.256469	0.138108	0.0367084	0.0463547	0.0599044	0.117075	0.0341191
COX20	COX20	green	green	0.0017632	-0.000590876	-0.00515307	0.0716824	0.080711	0.0487347	0.0716151	0.0489869
HNRNPU	HNRNPU	green	green	0.11173	0.056659	0.0595848	0.0462134	0.0448773	0.135296	0.114287	0.109485
EFCAB2	EFCAB2	grey	grey	0.0132174	-0.0793941	0.0402404	-0.0281463	-0.0571217	0.0612468	-0.0437333	0.0801993
KIF26B	KIF26B	blue	blue	0.0852995	0.105513	0.209079	0.00748569	-0.0257872	-0.00123115	0.0296994	0.0901143
SMYD3	SMYD3	turquoise	turquoise	0.159096	-0.0489645	0.111619	-0.162015	-0.195345	0.237822	-0.118905	0.225658
CNST	CNST	yellow	yellow	0.0321807	-0.0811168	0.0480342	-0.0143764	-0.065749	0.0941543	-0.039458	0.0999674
SCCPDH	SCCPDH	grey	grey	0.0399178	0.0467418	0.0469118	0.0622423	0.048355	0.0100458	0.0494318	0.0215519
AHCTF1	AHCTF1	red	red	0.0416537	-0.0498593	0.0616125	-0.0553936	-0.0585803	0.158795	-0.00420048	0.188052
NLRP3	NLRP3	turquoise	turquoise	0.000176851	-0.128063	-0.0914775	-0.0877802	-0.0753342	0.191028	-0.0643852	0.136665
ZNF672	ZNF672	grey	grey	0.126395	0.152995	0.0570915	0.0475056	0.055434	0.0217599	0.0913496	-0.00749884
ZNF692	ZNF692	grey	grey	0.160266	0.219576	0.191245	0.0201118	0.00178944	0.0108636	0.0768684	0.0527581
SH3YL1	SH3YL1	grey	grey	-0.017745	-0.125975	0.0300241	-0.03754	-0.0848809	0.0646674	-0.0680155	0.109283
ACP1	ACP1	grey	grey	0.182543	0.369834	0.300175	0.147248	0.152573	-0.0660212	0.215304	0.0352151
MYT1L	MYT1L	blue	blue	0.195926	0.331081	0.464643	0.178775	0.0713126	-0.164938	0.145161	0.00897311
EIPR1	EIPR1	red	red	0.0698557	0.0495518	0.0962985	0.0103467	-0.00174927	0.0886697	0.0342311	0.125249
TRAPPC12	TRAPPC12	grey	grey	0.134855	0.208227	0.103918	0.0564159	0.0669072	-0.00843811	0.0962674	-0.0150024
RNF144A	RNF144A	blue	blue	0.0557666	-0.0458789	0.153574	-0.0314268	-0.0899161	0.0210888	-0.0377718	0.0810257
ID2	ID2	grey	grey	-0.0332059	-0.0237913	-0.00229596	0.0748023	0.0725917	0.00557311	0.074926	0.00732164
KIDINS220	KIDINS220	grey	grey	0.142133	0.115365	0.1432	0.0489389	0.0161602	0.0535829	0.0660972	0.0683469
MBOAT2	MBOAT2	blue	blue	0.130945	0.134368	0.252422	0.0351403	-0.0127794	-0.000238011	0.0559865	0.095195
ASAP2	ASAP2	blue	blue	0.166886	0.247377	0.283422	0.105449	0.0689845	-0.0516668	0.142135	0.040193
ITGB1BP1	ITGB1BP1	grey	grey	-0.000334769	-0.0599522	0.0100412	0.0120461	0.00151042	0.0687828	4.84856035498715e-05	0.0818545
CPSF3	CPSF3	turquoise	turquoise	0.132871	0.10767	0.0312301	0.00489379	0.0224119	0.0816461	0.0499269	0.0329667
IAH1	IAH1	grey	grey	0.0873411	0.0701399	0.0101042	0.0282751	0.042529	0.0428576	0.0417225	0.00685147
ADAM17	ADAM17	turquoise	turquoise	0.0917797	-0.0874235	-0.0903155	-0.114819	-0.0817276	0.252433	-0.047937	0.145704
YWHAQ	YWHAQ	brown	brown	0.0813819	0.149985	0.0407952	0.200895	0.189737	-0.0221632	0.195528	-0.0441099
TAF1B	TAF1B	grey	grey	0.12275	0.13017	0.109542	-0.000566359	0.00713628	0.04784	0.0437708	0.0619216
HPCAL1	HPCAL1	blue	blue	-0.00022065	-0.182248	0.0452911	0.023808	-0.148141	-0.00465002	-0.147742	0.00345682
ODC1	ODC1	grey	grey	0.0977962	0.172404	0.106297	0.0772951	0.0884394	0.000471095	0.124564	0.012535
NOL10	NOL10	grey	grey	0.0312416	-0.0825112	0.0462744	-0.0776036	-0.0780568	0.147091	-0.0389003	0.159763
PDIA6	PDIA6	green	green	0.0453662	0.110807	-0.00403628	0.13577	0.168736	-0.00383442	0.192795	-0.0305854
KCNF1	KCNF1	brown	brown	0.00666858	0.0248763	0.0432219	0.113075	0.0556429	-0.0595131	0.0330923	-0.0350942
ROCK2	ROCK2	yellow	yellow	0.254725	0.212524	0.115287	0.11032	0.0737446	0.035994	0.103873	-0.0166254
LPIN1	LPIN1	grey	grey	0.0573638	-0.0278496	0.0423486	-0.0374036	-0.0459902	0.0700924	-0.0160979	0.0650978
NBAS	NBAS	grey	grey	0.0637333	-0.125264	0.0630804	-0.106476	-0.137041	0.213462	-0.0911138	0.226303
DDX1	DDX1	grey	grey	0.081848	0.12808	0.0803898	0.101513	0.10389	0.0158952	0.113417	0.0283682
VSNL1	VSNL1	brown	brown	0.0465845	0.129587	0.207385	0.356234	0.209466	-0.169699	0.168713	-0.0682782
SMC6	SMC6	grey	grey	0.13175	0.14617	0.0800381	0.0404766	0.0462537	0.0396102	0.0839639	0.0178028
RDH14	RDH14	grey	grey	0.0602748	0.133525	0.0249916	0.109615	0.1334	-0.0377185	0.128366	-0.048459
WDR35	WDR35	grey	grey	0.0513354	0.0557549	0.0884661	0.0226791	0.0100327	0.0151453	0.0378748	0.0491098
LAPTM4A	LAPTM4A	grey	grey	0.0759182	0.133274	-0.00121777	0.133056	0.149292	-0.00137052	0.159141	-0.0475218
PUM2	PUM2	turquoise	turquoise	0.0561888	-0.146434	-0.0259116	-0.0715475	-0.103187	0.244003	-0.0730441	0.189527
RHOB	RHOB	grey	grey	-0.0261469	-0.0935555	-0.0600641	0.0182077	0.0121156	0.093276	0.0254821	0.05389
LDAH	LDAH	grey	grey	0.102433	0.0738529	0.0368126	-0.00436719	0.0121273	0.0687227	0.0324884	0.040973
KLHL29	KLHL29	blue	blue	0.226368	0.400671	0.477526	0.0890562	0.0374219	-0.0995602	0.157808	0.0831937
ATAD2B	ATAD2B	turquoise	turquoise	0.140735	-0.0180748	0.0018839	-0.114883	-0.0988139	0.259934	-0.0290687	0.184802
UBXN2A	UBXN2A	green	green	0.0657734	0.0732263	0.0515967	0.046992	0.0538861	0.039219	0.092698	0.0342848
SF3B6	SF3B6	grey	grey	0.111526	0.249002	0.0555773	0.158429	0.214829	-0.0632449	0.208698	-0.0928513
FAM228B	FAM228B	grey	grey	0.0301217	-0.0458028	0.0416715	-0.0533274	-0.0626089	0.121367	-0.0392641	0.150473
ITSN2	ITSN2	turquoise	turquoise	0.127905	-0.0481474	-0.0210298	-0.119822	-0.103774	0.287006	-0.040466	0.212122
NCOA1	NCOA1	grey	grey	0.0772368	-0.110998	0.127264	-0.102597	-0.152322	0.215127	-0.0785809	0.261109
ADCY3	ADCY3	grey	grey	0.0871669	0.0888878	0.094064	0.0346712	0.0236388	0.0273775	0.0588916	0.043129
DNAJC27	DNAJC27	grey	grey	0.0741184	0.107648	0.0815937	0.0708676	0.0602865	0.00987536	0.0767897	0.0303354
EFR3B	EFR3B	blue	blue	0.120135	0.168349	0.250325	0.100804	0.0419486	-0.0438714	0.102026	0.0547536
DNMT3A	DNMT3A	turquoise	turquoise	0.247148	0.137395	0.0627592	-0.0463951	-0.0315357	0.202921	0.0236208	0.131487
DTNB	DTNB	red	red	0.0540576	-0.0624013	0.20099	-0.0993598	-0.144318	0.199986	-0.0600841	0.355964
ASXL2	ASXL2	turquoise	turquoise	0.17614	0.0733793	0.0252837	-0.0490086	-0.0420567	0.192896	0.00442646	0.12032
KIF3C	KIF3C	blue	blue	0.0341691	-0.0321323	0.13072	0.0911179	-0.0357571	-0.0102405	-0.0379559	0.0629298
RAB10	RAB10	turquoise	turquoise	0.0694865	-0.0871347	-0.0137428	-0.0710802	-0.0810132	0.247081	-0.0490321	0.216933
HADHA	HADHA	turquoise	turquoise	0.0972661	0.0361574	0.0127752	-0.0145524	-0.00221132	0.110284	0.0184707	0.0804755
HADHB	HADHB	green	green	0.0054767	-0.0275273	-0.0096519	-0.0095706	0.0219062	0.102464	0.0425395	0.0892522
SELENOI	SELENOI	yellow	yellow	0.052106	-0.0162881	0.0732994	-0.00514738	-0.0541912	0.0602944	-0.0234177	0.0818708
MAPRE3	MAPRE3	brown	brown	0.073447	0.0812071	0.143433	0.139277	0.0479729	-0.028259	0.0612548	0.025655
TMEM214	TMEM214	grey	grey	0.0646904	0.0968578	0.0831802	0.0420087	0.0381013	0.00630922	0.0614925	0.0272102
PREB	PREB	grey	grey	0.200177	0.254778	0.10171	0.060786	0.0791535	0.00281735	0.135637	-0.0320375
ATRAID	ATRAID	green	green	0.0936899	0.208775	0.0467455	0.12241	0.16762	-0.0560309	0.216027	-0.0757374
SLC30A3	SLC30A3	grey	grey	0.051444	0.0958799	0.102353	0.126386	0.0768827	-0.0593628	0.0746454	-0.0280243
MPV17	MPV17	grey	grey	0.0589092	0.0409695	0.0168461	0.0152684	0.0206432	0.0498786	0.0421273	0.0317318
GTF3C2	GTF3C2	yellow	yellow	0.162231	0.0984917	0.0527577	-0.00537311	-0.0079262	0.08355	0.0168467	0.0473182
EIF2B4	EIF2B4	grey	grey	0.122685	0.167401	0.077968	0.0617511	0.0702397	-0.00179566	0.1003	-0.0122422
SNX17	SNX17	grey	grey	0.0336621	0.060617	0.00709921	0.095941	0.0983831	-0.0287903	0.0874773	-0.03716
PPM1G	PPM1G	grey	grey	0.0671094	0.0641113	0.0393314	0.0440741	0.0420713	0.0286966	0.0653539	0.0212351
NRBP1	NRBP1	grey	grey	0.0663714	0.0529053	0.0307859	0.0480143	0.0435348	0.0338494	0.048377	0.0108036
IFT172	IFT172	grey	grey	0.0858197	0.0482047	0.0911687	0.00164932	-0.0109945	0.0550005	0.0159411	0.0663809
FNDC4	FNDC4	brown	brown	0.0302501	0.083815	0.0709859	0.130115	0.106387	-0.0544649	0.0983793	-0.0274214
ZNF512	ZNF512	grey	grey	0.222171	0.289483	0.0973868	0.0664772	0.0878775	-0.00389197	0.12316	-0.0653813
SLC4A1AP	SLC4A1AP	grey	grey	0.0649154	0.0479638	0.0410495	0.0205456	0.0113551	0.0475863	0.0292795	0.0331946
MRPL33	MRPL33	grey	grey	0.0429911	0.0808453	0.0374067	0.0977336	0.108573	-0.0128295	0.109587	-0.019852
RBKS	RBKS	turquoise	turquoise	0.121262	0.0633456	-0.00226433	-0.0274899	0.00328149	0.118495	0.0478788	0.0506671
BABAM2	BABAM2	turquoise	turquoise	0.139053	-0.0505788	-0.0202084	-0.134048	-0.105628	0.303048	-0.0541539	0.219239
PPP1CB	PPP1CB	grey	grey	0.106213	0.102491	0.0254444	0.0391524	0.0835226	0.113119	0.123683	0.0680507
WDR43	WDR43	turquoise	turquoise	0.0922861	0.024315	0.0325905	-0.0394584	-0.023779	0.148052	0.0206238	0.122751
CLIP4	CLIP4	blue	blue	0.0248903	-0.0471102	0.111375	-0.0025785	-0.05633	0.000606929	-0.0138889	0.0410843
YPEL5	YPEL5	grey	grey	0.00651129	-0.0485256	-0.00561851	0.05599	0.0204868	0.051469	0.0142265	0.0392
LCLAT1	LCLAT1	grey	grey	0.0786034	0.0588443	0.120251	-0.00974221	-0.0308762	0.0462654	0.0133229	0.0866406
GALNT14	GALNT14	blue	blue	0.105892	0.186024	0.231328	0.0601221	0.0452149	-0.053875	0.0793307	0.0312333
EHD3	EHD3	brown	brown	0.00217596	0.000661155	0.0526329	0.0985998	0.0437921	-0.016568	0.0357048	0.0119637
MEMO1	MEMO1	yellow	yellow	0.285376	0.286362	0.141987	0.0328313	0.0320382	0.02102	0.0948301	-0.0286549
DPY30	DPY30	grey	grey	0.0603574	0.0822976	0.0422509	0.0748294	0.0773468	0.00249456	0.0839161	-0.00135045
SPAST	SPAST	grey	grey	0.114877	0.071582	0.0667339	0.000179246	-0.0098835	0.0910875	0.0235524	0.0821663
SLC30A6	SLC30A6	grey	grey	0.0765243	0.0588492	0.0487741	-0.00597238	-0.00118193	0.0696768	0.0267192	0.072172
YIPF4	YIPF4	grey	grey	0.0299421	-0.0162329	0.0142103	0.0238393	0.0147263	0.0540777	0.0126444	0.0587754
BIRC6	BIRC6	turquoise	turquoise	0.068116	-0.14915	0.0513703	-0.122581	-0.148885	0.290603	-0.0817566	0.281126
TTC27	TTC27	turquoise	turquoise	0.024488	-0.0708886	0.0104972	-0.0700794	-0.0561446	0.170101	-0.0294186	0.165432
RASGRP3	RASGRP3	turquoise	turquoise	0.296664	0.129252	-0.140586	-0.0619014	0.00661684	0.234578	0.0552103	-0.0328586
FAM98A	FAM98A	grey	grey	0.0793046	0.0827863	0.0742937	0.0504212	0.0467819	0.0289765	0.0744767	0.0408507
CRIM1	CRIM1	grey	grey	0.105467	0.102259	0.132322	0.0444661	0.00793592	0.00515438	0.058633	0.0215483
FEZ2	FEZ2	turquoise	turquoise	-0.0241999	-0.221286	-0.0790641	-0.0924431	-0.105721	0.256561	-0.0962443	0.237116
STRN	STRN	turquoise	turquoise	0.0571498	-0.0364962	0.0490078	-0.0497293	-0.0571239	0.135728	-0.0149728	0.14226
HEATR5B	HEATR5B	turquoise	turquoise	-0.0220586	-0.171539	-0.0283428	-0.0987197	-0.106281	0.229586	-0.0904602	0.239666
GPATCH11	GPATCH11	green	green	0.0363451	0.0370451	0.00815181	0.0467645	0.0559354	0.0333933	0.0620559	0.0243533
EIF2AK2	EIF2AK2	turquoise	turquoise	0.0134081	-0.160149	-0.0640161	-0.0751962	-0.0881508	0.181529	-0.087	0.140909
CEBPZOS	CEBPZOS	grey	grey	0.00779972	-0.017767	-0.00665252	0.0614836	0.0526099	0.0361623	0.0399866	0.0317944
CEBPZ	CEBPZ	turquoise	turquoise	0.191755	0.190838	0.007442	0.0509189	0.0991333	0.0690366	0.138598	-0.0373113
NDUFAF7	NDUFAF7	grey	grey	0.127072	0.176146	0.123214	0.0556151	0.061878	0.00729484	0.101815	0.0151598
PRKD3	PRKD3	turquoise	turquoise	-0.000289234	-0.171035	-0.111927	-0.120438	-0.0818583	0.300666	-0.0536839	0.236233
CDC42EP3	CDC42EP3	grey	grey	0.0870079	0.105221	0.0576848	0.0539817	0.0539892	0.00592533	0.0757514	-0.00595222
ATL2	ATL2	grey	grey	-0.0259343	-0.163337	-0.00594789	-0.0617302	-0.085793	0.168602	-0.0609101	0.17721
HNRNPLL	HNRNPLL	grey	grey	0.0871874	0.0362367	0.132635	0.00198225	-0.0403001	0.0756005	0.00907712	0.112751
SRSF7	SRSF7	turquoise	turquoise	0.191783	0.176274	0.0168462	0.0310465	0.0902869	0.131758	0.13654	0.033601
DHX57	DHX57	grey	grey	0.156026	0.143886	0.103108	0.0069719	0.00407936	0.0621854	0.0524467	0.0434918
SOS1	SOS1	grey	grey	0.0307391	-0.134842	0.0263458	-0.0876766	-0.112342	0.19388	-0.0795873	0.205325
MAP4K3	MAP4K3	turquoise	turquoise	0.0909188	-0.0892032	0.0568173	-0.0984482	-0.120555	0.256038	-0.0439398	0.241622
TMEM178A	TMEM178A	blue	blue	0.0845261	0.163967	0.228348	0.119174	0.0526005	-0.113994	0.0853913	-0.0234669
THUMPD2	THUMPD2	turquoise	turquoise	-0.00368265	-0.132156	-0.0284081	-0.0801598	-0.0758939	0.188594	-0.0469328	0.170226
SLC8A1	SLC8A1	turquoise	turquoise	0.308255	0.0210842	-0.0525219	-0.152024	-0.144825	0.41209	-0.0923381	0.241402
EML4	EML4	turquoise	turquoise	0.0957981	-0.10462	-0.0586928	-0.160809	-0.113891	0.36851	-0.0556092	0.279401
COX7A2L	COX7A2L	brown	brown	0.0295872	0.0974897	0.0413989	0.200614	0.180853	-0.0781353	0.160354	-0.074093
MTA3	MTA3	grey	grey	0.101246	-0.00211559	0.11575	-0.045176	-0.0800719	0.108561	-0.0415845	0.137883
ZFP36L2	ZFP36L2	red	red	-0.108168	-0.263424	-0.129581	-0.147414	-0.170277	0.184828	-0.18991	0.196412
THADA	THADA	turquoise	turquoise	0.125848	-0.0454917	-0.0121548	-0.119054	-0.109176	0.273601	-0.0548348	0.206374
PLEKHH2	PLEKHH2	grey	grey	0.112613	0.115684	0.112056	0.00947551	-7.15843e-05	0.0340212	0.0534587	0.0638834
DYNC2LI1	DYNC2LI1	grey	grey	-0.0119624	-0.0795188	0.0469177	-0.00597818	-0.0364376	0.0399893	-0.0309973	0.0759631
LRPPRC	LRPPRC	yellow	yellow	0.0743209	-0.0500739	0.0535305	-0.0325578	-0.0632471	0.134092	-0.027133	0.132814
PREPL	PREPL	blue	blue	-0.0358627	-0.216723	0.115983	0.0649462	-0.136671	-0.00935707	-0.143483	0.0813903
CAMKMT	CAMKMT	turquoise	turquoise	0.087823	-0.0114435	0.0780312	-0.0785825	-0.0843784	0.178391	-0.0203676	0.197599
SRBD1	SRBD1	turquoise	turquoise	0.0527793	-0.0577309	-0.0267333	-0.0823647	-0.0709915	0.193423	-0.0372896	0.15183
PRKCE	PRKCE	blue	blue	0.218584	0.211944	0.286018	0.0635423	0.00727936	0.0401989	0.0980364	0.0891647
EPAS1	EPAS1	grey	grey	0.0272116	0.103714	-0.00144011	0.10497	0.13305	-0.0356425	0.151514	-0.0560846
RHOQ	RHOQ	turquoise	turquoise	0.0513925	-0.16085	-0.129793	-0.114147	-0.0724334	0.334029	-0.039099	0.220665
PIGF	PIGF	turquoise	turquoise	0.0285045	-0.0383866	-0.0167369	-0.0229459	-0.0118135	0.115735	-0.00553899	0.102384
CRIPT	CRIPT	grey	grey	0.0600994	0.0938564	0.034013	0.102316	0.112611	-0.0137517	0.105346	-0.0266843
MCFD2	MCFD2	grey	grey	0.0140681	-0.0146217	-0.00360427	0.0872754	0.0623895	0.0404832	0.0474983	0.0329135
TTC7A	TTC7A	turquoise	turquoise	-0.0329664	-0.266968	-0.159577	-0.163551	-0.126388	0.374919	-0.129237	0.329641
CALM2	CALM2	black	black	0.230368	0.642177	0.066199	0.440424	0.594657	-0.262368	0.536276	-0.360719
MSH2	MSH2	grey	grey	0.0273872	-0.0405641	0.054948	-0.00349383	-0.0316462	0.0519328	-0.0176387	0.074291
KCNK12	KCNK12	grey	grey	0.134641	0.138241	0.061224	0.0753864	0.0655101	0.00527385	0.084131	-0.0324723
FBXO11	FBXO11	turquoise	turquoise	0.0702013	-0.151412	-0.00484248	-0.113373	-0.126042	0.320841	-0.0794252	0.295527
FOXN2	FOXN2	grey	grey	0.0173402	-0.131178	-0.0225531	-0.0874093	-0.0943092	0.168004	-0.0654416	0.154284
PPP1R21	PPP1R21	turquoise	turquoise	0.162461	0.00815437	-0.00900813	-0.0562234	-0.0598169	0.184041	-0.017715	0.0974331
NRXN1	NRXN1	blue	blue	0.187803	0.360503	0.542248	0.170645	0.0466224	-0.282552	0.112001	-0.066141
ASB3	ASB3	yellow	yellow	0.149013	0.00128904	0.145712	-0.0563738	-0.108795	0.107714	-0.0460543	0.133953
ERLEC1	ERLEC1	grey	grey	0.0929332	0.12229	0.068966	0.0811435	0.0745027	0.00969335	0.0899154	-0.000598679
PSME4	PSME4	turquoise	turquoise	0.156607	0.0236284	0.0835723	-0.0877956	-0.0829988	0.244964	0.0039725	0.217974
ACYP2	ACYP2	red	red	0.0217643	-0.120695	0.0897508	-0.107056	-0.132665	0.169	-0.0801278	0.250864
SPTBN1	SPTBN1	blue	blue	0.0997246	0.174867	0.239794	0.225748	0.13992	-0.104222	0.169407	-0.012843
EML6	EML6	blue	blue	0.308193	0.354927	0.340679	0.0225815	-0.00687162	-0.0163475	0.104441	0.0192096
RTN4	RTN4	black	black	0.0276503	-0.0676417	-0.00955357	0.1749	0.123791	0.0994639	0.090732	0.0858458
MTIF2	MTIF2	turquoise	turquoise	0.219254	0.269027	0.12307	0.035655	0.0638989	0.0232539	0.116521	-0.00553846
CCDC88A	CCDC88A	blue	blue	0.0461283	-0.0945082	0.154045	-0.110744	-0.161367	0.150935	-0.0996974	0.242493
CFAP36	CFAP36	grey	grey	0.0962071	0.193756	0.109384	0.1366	0.156512	-0.0449543	0.158565	-0.0244116
PPP4R3B	PPP4R3B	grey	grey	0.125742	0.0377343	0.0460366	-0.0201925	-0.0197791	0.140347	0.0139084	0.105051
PNPT1	PNPT1	grey	grey	0.0952522	0.0664442	0.120329	-0.0138368	-0.0306418	0.0675154	0.0131671	0.098046
CCDC85A	CCDC85A	blue	blue	0.194194	0.377238	0.322647	0.109338	0.102595	-0.0868463	0.179526	0.015663
VRK2	VRK2	turquoise	turquoise	0.216459	0.0310862	-0.110604	-0.0894772	-0.0478504	0.241451	-0.00908435	0.0586813
FANCL	FANCL	yellow	yellow	0.068132	-0.0425327	0.0438068	-0.0550999	-0.0839577	0.0738289	-0.0579954	0.0677347
BCL11A	BCL11A	blue	blue	0.178517	0.287001	0.346968	0.105041	0.0470733	-0.0795801	0.122991	0.0354169
PAPOLG	PAPOLG	grey	grey	-0.0473661	-0.183993	-0.0585032	-0.106951	-0.0820378	0.239206	-0.0314262	0.21699
REL	REL	turquoise	turquoise	-0.0279994	-0.244897	-0.177554	-0.158934	-0.0887648	0.38657	-0.0275172	0.260332
PUS10	PUS10	grey	grey	0.129422	0.119471	0.102992	-0.0157377	-0.0113441	0.0649273	0.0322663	0.0707864
PEX13	PEX13	grey	grey	0.0819854	0.0771267	0.0523494	0.0262591	0.0366208	0.0560465	0.0645651	0.0409457
AHSA2P	AHSA2P	grey	grey	0.00261226	-0.0846894	-0.0299795	-0.0311253	-0.0334611	0.118966	-0.023858	0.123319
USP34	USP34	turquoise	turquoise	0.134928	-0.0102896	0.0911051	-0.0713295	-0.0890978	0.249411	-0.00682756	0.238974
XPO1	XPO1	turquoise	turquoise	-0.0015555	-0.153677	-0.0120169	-0.0961256	-0.105801	0.221438	-0.0855835	0.227043
CCT4	CCT4	grey	grey	0.0267388	0.0361446	-0.0233256	0.0901991	0.108392	0.0345635	0.0921654	0.00573735
COMMD1	COMMD1	grey	grey	-0.0202242	-0.176518	-0.0428112	-0.0846842	-0.0790218	0.195104	-0.0664614	0.189969
B3GNT2	B3GNT2	grey	grey	0.0774913	0.0738422	0.00247443	0.0332442	0.0405496	0.0332731	0.0492843	-0.00345566
EHBP1	EHBP1	blue	blue	0.164343	0.0923996	0.236652	-0.02095	-0.0761636	0.0853	0.000801878	0.154581
WDPCP	WDPCP	turquoise	turquoise	0.0429728	-0.130402	0.0647561	-0.122476	-0.141918	0.172561	-0.0999205	0.202835
MDH1	MDH1	brown	brown	0.078023	0.284439	0.0331004	0.37485	0.392567	-0.145153	0.334191	-0.178703
UGP2	UGP2	grey	grey	0.0746414	-0.00125152	-0.00759057	0.0268038	0.0223614	0.118173	0.0309764	0.0867704
VPS54	VPS54	turquoise	turquoise	0.166745	0.0373141	0.0316957	-0.0736368	-0.065513	0.196214	-0.00553764	0.126591
PELI1	PELI1	turquoise	turquoise	0.0547408	-0.17986	-0.126972	-0.143846	-0.105137	0.382952	-0.0619858	0.284285
AFTPH	AFTPH	turquoise	turquoise	0.207033	0.0773337	-0.0376912	-0.0416834	-0.0231585	0.214316	0.0269982	0.0791523
SERTAD2	SERTAD2	grey	grey	0.126102	0.120943	0.117016	0.00166359	0.00206673	0.100813	0.0517533	0.12815
SLC1A4	SLC1A4	grey	grey	-0.00707197	-0.0647031	0.0124556	0.00529187	-0.0218849	0.0842526	-0.0123202	0.102227
CEP68	CEP68	turquoise	turquoise	0.197571	0.0971183	-0.0137878	-0.0209456	0.00362842	0.145073	0.0480095	0.0206856
RAB1A	RAB1A	grey	grey	-0.0493471	-0.275343	-0.124827	-0.0974001	-0.0927169	0.325144	-0.0654303	0.267795
ACTR2	ACTR2	yellow	yellow	0.133401	-0.00704375	0.0191665	0.0508939	-0.0120163	0.133536	-0.00503499	0.083954
SPRED2	SPRED2	red	red	0.135292	0.109256	0.196205	-0.00140749	-0.0304515	0.100777	0.0325399	0.181851
MEIS1	MEIS1	grey	grey	0.0860209	0.00620502	0.0177346	-0.04951	-0.0469459	0.0928318	-0.0150313	0.0766905
C1D	C1D	grey	grey	0.00931612	-0.0035355	0.0171355	0.0745237	0.0549551	0.00966205	0.0434545	0.0133226
CNRIP1	CNRIP1	grey	grey	0.132648	0.187925	0.155323	0.103731	0.0735603	-0.00987096	0.102101	0.0143611
PLEK	PLEK	turquoise	turquoise	0.167355	0.0173514	-0.115838	-0.0912524	-0.0369814	0.255991	0.00944043	0.0683793
ARHGAP25	ARHGAP25	turquoise	turquoise	-0.0519511	-0.301493	-0.188693	-0.217756	-0.156757	0.430837	-0.118904	0.348729
ANTXR1	ANTXR1	blue	blue	0.0429051	-0.00025216	0.114507	-0.0297038	-0.0547023	0.0558532	-0.0230008	0.118507
GFPT1	GFPT1	grey	grey	0.0462815	-0.00629468	0.0375611	0.00274878	-0.0140724	0.0822229	0.0110174	0.0798951
NFU1	NFU1	grey	grey	0.059228	0.0989137	0.0180885	0.087495	0.121106	0.00448222	0.126368	-0.0141984
AAK1	AAK1	red	red	0.0819046	-0.063455	0.114904	-0.0233711	-0.0659659	0.242846	-0.0143983	0.305841
ANXA4	ANXA4	turquoise	turquoise	-0.0573654	-0.229073	-0.0884568	-0.102607	-0.0998031	0.239945	-0.11858	0.246407
GMCL1	GMCL1	blue	blue	0.136155	0.17014	0.202195	0.0349356	0.00447712	-0.00407926	0.0667279	0.0517059
SNRNP27	SNRNP27	grey	grey	0.123486	0.262573	0.0586497	0.148849	0.197872	-0.0694009	0.2016	-0.0979547
MXD1	MXD1	grey	grey	0.0103762	-0.0689668	0.0171328	-0.0269338	-0.0504356	0.061483	-0.0243495	0.0587732
PCBP1	PCBP1	brown	brown	0.00652367	0.0207507	0.00205674	0.144653	0.0992951	-0.0371372	0.0722042	-0.0470847
C2orf42	C2orf42	grey	grey	0.153743	0.138418	0.0311556	0.00663361	0.0183284	0.035258	0.0543927	-0.023726
TIA1	TIA1	grey	grey	0.320841	0.463264	0.242549	0.0901364	0.114122	-0.0421197	0.204399	-0.0572606
PCYOX1	PCYOX1	grey	grey	0.0344224	0.0295722	0.0364246	0.0751585	0.0509916	-0.00189635	0.0361976	0.0095312
SNRPG	SNRPG	green	green	0.0410898	0.148425	0.00831526	0.160037	0.203215	-0.0277563	0.221161	-0.0509198
TGFA	TGFA	turquoise	turquoise	0.179628	0.0912962	-0.056382	-0.0366614	-0.00958472	0.128106	0.014217	-0.0110813
ADD2	ADD2	blue	blue	0.105822	0.175505	0.306364	0.141456	0.0237107	-0.112723	0.0661138	0.0242252
NAGK	NAGK	grey	grey	0.0913424	0.0785707	0.0151627	0.0243962	0.0487848	0.0948996	0.0651061	0.0664213
MCEE	MCEE	grey	grey	0.0453021	0.0773841	0.006101	0.0777915	0.096383	0.000733675	0.0774129	-0.0169405
MPHOSPH10	MPHOSPH10	green	green	0.0452625	0.0417421	0.0177174	0.0318429	0.0344549	0.0356999	0.052272	0.0269045
PAIP2B	PAIP2B	grey	grey	0.0690886	0.115767	0.0409643	0.068579	0.0772424	-0.0146252	0.0933355	-0.0221649
ZNF638	ZNF638	turquoise	turquoise	0.117205	-0.0919553	0.0479381	-0.125567	-0.139722	0.248415	-0.0855424	0.237765
EXOC6B	EXOC6B	grey	grey	0.190848	0.0238669	0.146649	-0.0992874	-0.130384	0.184121	-0.0373883	0.193221
SFXN5	SFXN5	grey	grey	0.0839261	0.0371926	0.108023	0.0144445	-0.0111134	0.0804381	0.0311718	0.122055
CCT7	CCT7	black	black	0.0443254	0.178003	0.0141136	0.205667	0.262191	-0.063789	0.213492	-0.0791987
FBXO41	FBXO41	blue	blue	0.0883008	0.158546	0.185996	0.122381	0.0805149	-0.0348178	0.110051	0.0412521
ALMS1	ALMS1	red	red	0.0183847	-0.0711414	0.0720303	-0.0832647	-0.0892554	0.116323	-0.0560273	0.185421
TPRKB	TPRKB	grey	grey	0.10897	0.160028	0.055533	0.0672358	0.0892844	0.00570258	0.115865	-0.0146641
DUSP11	DUSP11	grey	grey	0.168087	0.233509	0.116496	0.0510841	0.0597227	-0.00537954	0.108532	-0.0235839
STAMBP	STAMBP	grey	grey	0.0215329	-0.00394353	-0.00438604	0.0253119	0.0295645	0.0553514	0.0409236	0.050224
DGUOK	DGUOK	grey	grey	0.0837276	0.0449886	0.0203998	0.0111559	0.0108649	0.0668245	0.0296268	0.0435911
TET3	TET3	turquoise	turquoise	0.159149	0.00390584	-0.00594064	-0.0793785	-0.0713735	0.238374	-0.0393767	0.165773
MOB1A	MOB1A	turquoise	turquoise	0.0311776	-0.076656	-0.0573444	-0.0361017	-0.0243103	0.173584	-0.0138336	0.118663
DCTN1	DCTN1	grey	grey	0.113196	0.256047	0.102323	0.181311	0.193703	-0.0640111	0.203739	-0.0599161
MRPL53	MRPL53	grey	grey	0.0539104	0.195789	0.0355493	0.154079	0.20189	-0.0871417	0.191226	-0.0939278
AUP1	AUP1	grey	grey	0.0679806	0.0697617	0.0188921	0.0230104	0.0167239	0.00784567	0.0327094	-0.0163174
HTRA2	HTRA2	yellow	yellow	0.16428	0.18447	0.0402184	0.0589072	0.0712709	-0.00138179	0.0930188	-0.0589536
LOXL3	LOXL3	turquoise	turquoise	-0.0215464	-0.150939	-0.0814885	-0.0962549	-0.0972641	0.191378	-0.110669	0.167261
HK2	HK2	turquoise	turquoise	0.333407	0.190702	-0.161589	-0.0498572	0.0319542	0.193477	0.0485642	-0.0895846
MRPL19	MRPL19	grey	grey	0.00818212	-0.0144219	0.0223426	0.0648023	0.0329976	0.010104	0.0335384	0.0257328
GCFC2	GCFC2	grey	grey	0.022769	-0.0767876	0.0184719	-0.0387722	-0.0598676	0.102583	-0.0402088	0.11171
LRRTM4	LRRTM4	blue	blue	0.0881271	0.120958	0.523986	0.0480222	-0.138585	-0.229224	-0.0688079	0.0213117
CTNNA2	CTNNA2	blue	blue	0.188358	0.266865	0.531353	0.0471091	-0.0541511	-0.146491	0.0486172	0.0787577
LRRTM1	LRRTM1	grey	grey	0.0836606	0.182965	0.1397	0.0905203	0.0813294	-0.0615175	0.107535	-0.0181241
SUCLG1	SUCLG1	green	green	0.0550816	0.160049	0.0402099	0.144901	0.186403	-0.0384144	0.209907	-0.0426791
TMSB10	TMSB10	black	black	-0.0902008	-0.0324813	-0.0592749	0.249888	0.270012	-0.0327938	0.180937	-0.0300606
KCMF1	KCMF1	turquoise	turquoise	0.15244	0.0793881	0.0392279	-0.0107751	0.00697681	0.15215	0.0474431	0.100196
TGOLN2	TGOLN2	brown	brown	-0.0128235	-0.0783	-0.00413996	0.0556534	0.00698375	0.0584259	-0.00284499	0.0710751
ELMOD3	ELMOD3	grey	grey	0.00528663	-0.0885764	-0.0100968	-0.0405033	-0.0494469	0.121677	-0.0400556	0.130356
MAT2A	MAT2A	grey	grey	0.125328	0.133624	0.046852	0.0381533	0.0771054	0.0991418	0.135736	0.0554767
USP39	USP39	grey	grey	-0.0238159	-0.106064	-0.0338404	-0.0243052	-0.0202377	0.136489	-0.0159866	0.138225
C2orf68	C2orf68	turquoise	turquoise	0.14957	0.161782	0.0229583	0.0304572	0.0643448	0.0417258	0.0888342	-0.0189105
ST3GAL5	ST3GAL5	turquoise	turquoise	0.229877	0.21415	0.0908007	0.0746063	0.0757928	0.0772908	0.121761	0.0157381
POLR1A	POLR1A	turquoise	turquoise	0.0885453	0.0253529	0.0297428	-0.0187684	-0.0166404	0.106823	0.00636009	0.0780479
PTCD3	PTCD3	grey	grey	0.0847982	0.013939	0.0600672	-0.0177713	-0.033468	0.101116	0.00581646	0.100097
IMMT	IMMT	green	green	0.0798212	0.0895301	0.020312	0.0788494	0.101313	0.0519149	0.118235	0.023773
REEP1	REEP1	blue	blue	0.131098	0.242865	0.290906	0.108052	0.070823	-0.0700053	0.12655	0.0457048
KDM3A	KDM3A	turquoise	turquoise	0.119024	0.0604245	0.0350409	-0.0303738	-0.0184316	0.110716	0.0232669	0.0732912
CHMP3	CHMP3	grey	grey	0.15378	0.210276	0.0466501	0.14154	0.142507	-0.0199356	0.146901	-0.0794261
RMND5A	RMND5A	grey	grey	0.145458	0.162243	0.125547	0.0605336	0.0335142	0.00204488	0.0800481	0.000689523
KRCC1	KRCC1	turquoise	turquoise	0.147736	0.04881	-0.0597309	-0.0391687	-0.0117181	0.146529	0.00272424	0.0331522
EIF2AK3	EIF2AK3	turquoise	turquoise	0.0604167	-0.0113767	-0.00844874	-0.0471206	-0.035457	0.134693	0.00738098	0.0905665
MAL	MAL	green	green	0.0409898	0.108881	-0.025951	0.0890855	0.157952	-0.0307547	0.187895	-0.065544
MRPS5	MRPS5	grey	grey	0.095618	0.10758	0.0992848	0.042826	0.0380043	0.0288234	0.0704933	0.0521122
KCNIP3	KCNIP3	yellow	yellow	0.29853	0.355376	0.25179	0.0962362	0.0657236	-0.0323818	0.148238	-0.0138085
STARD7	STARD7	grey	grey	0.0414645	-0.0182268	0.0833336	0.0303616	-0.0327888	0.0217568	-0.0180273	0.0588138
TMEM127	TMEM127	grey	grey	0.0690831	0.049208	0.0281081	0.0724054	0.0348513	0.0118513	0.0335026	-0.0102767
CIAO1	CIAO1	grey	grey	-0.00982489	-0.0609257	-0.00190364	0.0330273	0.019521	0.0683328	0.0148413	0.076219
SNRNP200	SNRNP200	grey	grey	0.0313224	0.0110813	0.0160934	0.0250133	0.0171979	0.0462278	0.0252081	0.0393057
ARID5A	ARID5A	grey	grey	-0.079041	-0.200203	-0.0854016	-0.0902878	-0.0824992	0.182379	-0.0652257	0.167802
KANSL3	KANSL3	grey	grey	0.0880803	0.0416858	0.0528873	-0.0141954	-0.0126495	0.0855605	0.0150493	0.0729452
LMAN2L	LMAN2L	grey	grey	0.16178	0.188244	0.0947179	0.0296501	0.0388696	0.0135584	0.0790568	-0.0117352
COX5B	COX5B	black	black	0.01777	0.249572	-0.0155038	0.334055	0.43507	-0.141164	0.356405	-0.170148
ACTR1B	ACTR1B	grey	grey	0.0913794	0.178722	0.103769	0.155479	0.146696	-0.0422869	0.147209	-0.0243551
TMEM131	TMEM131	turquoise	turquoise	0.0705451	-0.101366	0.00347478	-0.106546	-0.105928	0.278857	-0.0477326	0.248303
INPP4A	INPP4A	grey	grey	0.00533718	-0.137063	0.0460601	-0.048056	-0.0810946	0.214214	-0.0458332	0.24397
UNC50	UNC50	grey	grey	0.0424252	0.0971606	0.0140628	0.0921582	0.119923	-0.0154838	0.116479	-0.0340239
MGAT4A	MGAT4A	turquoise	turquoise	0.0997618	-0.199882	-0.173414	-0.194968	-0.191258	0.383015	-0.187015	0.255483
TSGA10	TSGA10	grey	grey	0.111816	0.0592806	0.0870265	-0.00916517	-0.0232931	0.0684631	0.000973686	0.060973
MITD1	MITD1	green	green	0.0529723	0.0243599	0.00592091	0.00641243	0.020137	0.0739303	0.0325825	0.0682477
TXNDC9	TXNDC9	green	green	0.0935085	0.159572	0.0294865	0.106846	0.126233	-0.0213377	0.164815	-0.0528819
EIF5B	EIF5B	grey	grey	0.128779	0.173666	0.0599042	0.0823471	0.0989184	0.0148885	0.127606	-0.0173256
REV1	REV1	grey	grey	0.0724187	-0.0492566	0.070001	-0.0689712	-0.0998273	0.16577	-0.0568378	0.192657
AFF3	AFF3	blue	blue	0.0947056	0.092691	0.358762	0.0216627	-0.0773295	-0.0258122	-0.0101807	0.144513
LONRF2	LONRF2	blue	blue	0.00411292	-0.0889059	0.141837	0.0938184	-0.0537975	-0.0353696	-0.0539559	0.0434317
NPAS2	NPAS2	blue	blue	0.147448	0.200757	0.352201	0.0404385	-0.0318038	-0.0607942	0.0522576	0.08213
TBC1D8	TBC1D8	turquoise	turquoise	0.0797122	-0.00326938	0.0112248	-0.08071	-0.0582893	0.155371	-0.00225505	0.0965047
RNF149	RNF149	turquoise	turquoise	-0.0799563	-0.308066	-0.112738	-0.18571	-0.149302	0.343141	-0.111404	0.297082
CREG2	CREG2	brown	brown	-0.0147774	-0.123464	0.0774412	0.145848	-0.023535	-0.0249772	-0.0552577	0.0317971
MAP4K4	MAP4K4	turquoise	turquoise	0.0509871	-0.293666	-0.121327	-0.221082	-0.244733	0.400406	-0.214772	0.347735
MRPS9	MRPS9	grey	grey	0.105968	0.114324	0.0812274	0.0334733	0.0396652	0.0367546	0.0638849	0.0377624
TGFBRAP1	TGFBRAP1	turquoise	turquoise	0.116965	0.0665565	0.034781	-0.00265507	-0.00469132	0.0862547	0.0194916	0.0534916
FHL2	FHL2	grey	grey	0.0796398	0.220867	0.172972	0.121006	0.121501	-0.0881919	0.137519	-0.0226219
NCK2	NCK2	red	red	-0.167661	-0.392849	-0.104748	-0.240515	-0.2068	0.4025	-0.171044	0.467675
UXS1	UXS1	grey	grey	0.0741779	0.0844061	0.0901532	0.0299255	0.0380528	0.0475897	0.0512476	0.0747567
ST6GAL2	ST6GAL2	blue	blue	0.116484	0.226555	0.31344	0.0789588	0.0248774	-0.0862972	0.0853433	0.0437099
GCC2	GCC2	green	green	0.040252	-0.0183528	0.0302162	0.0392177	0.0239206	0.114862	0.0379067	0.12037
LIMS1	LIMS1	turquoise	turquoise	0.110703	-0.139142	-0.14287	-0.176644	-0.117178	0.408345	-0.061436	0.264351
RANBP2	RANBP2	grey	grey	0.00032247	-0.145052	-0.0179743	-0.0786964	-0.0678789	0.239981	-0.00649157	0.215643
CCDC138	CCDC138	red	red	0.0126199	-0.0476022	0.0588664	-0.0434364	-0.0593979	0.0804067	-0.022357	0.121588
SH3RF3	SH3RF3	red	red	-0.14716	-0.386029	0.00526864	-0.236616	-0.249293	0.413125	-0.202431	0.562766
MTLN	MTLN	green	green	0.0382033	0.104882	0.0154689	0.131034	0.140966	-0.0240939	0.150247	-0.0378252
ANAPC1	ANAPC1	grey	grey	0.108456	0.0726824	0.0719861	-0.0140136	-0.0113394	0.0833566	0.0236914	0.0725511
MERTK	MERTK	turquoise	turquoise	0.344567	0.0151682	-0.242657	-0.155991	-0.0795695	0.435172	-0.0474036	0.0988416
TMEM87B	TMEM87B	turquoise	turquoise	0.0948103	0.0470763	0.00184818	-0.0237746	-0.00899911	0.0959357	0.00995047	0.0546769
ZC3H8	ZC3H8	grey	grey	0.0374953	-0.0184456	0.0344534	-0.0077846	-0.0204185	0.0742216	-0.00125883	0.0778625
ZC3H6	ZC3H6	grey	grey	0.0595393	0.00128891	0.0682085	-0.0294877	-0.0395907	0.0916591	-0.0119234	0.114841
TTL	TTL	green	green	0.0278699	-0.0281988	0.0534661	0.0286887	0.00287663	0.0675196	0.0209071	0.0956272
SLC20A1	SLC20A1	grey	grey	0.0139088	-0.00949016	0.0378938	0.0226902	0.0151995	0.0535518	0.0318936	0.0676171
SLC35F5	SLC35F5	grey	grey	-0.021299	-0.176008	-0.00804882	-0.0760283	-0.0939793	0.159451	-0.0827874	0.176138
ACTR3	ACTR3	turquoise	turquoise	0.0915098	-0.00376682	-0.0366605	-0.00739549	0.00351114	0.191318	0.0234481	0.121122
DPP10	DPP10	blue	blue	0.190674	0.393267	0.557902	0.179502	0.062781	-0.299061	0.143087	-0.0754515
DDX18	DDX18	green	green	0.0718793	0.0619643	0.013543	0.0462964	0.0682567	0.0743074	0.0862452	0.0493319
CCDC93	CCDC93	turquoise	turquoise	0.161117	0.0380882	-0.0340451	-0.0611294	-0.0414318	0.174906	-0.00059511	0.0609057
INSIG2	INSIG2	grey	grey	0.0600486	0.037573	0.0300116	0.0316096	0.0126784	0.0520804	0.0361778	0.0433848
DBI	DBI	green	green	0.0152044	0.206517	-0.0204705	0.245772	0.333254	-0.100338	0.339007	-0.130981
PTPN4	PTPN4	blue	blue	0.142463	0.090182	0.198813	0.019056	-0.0349051	0.0511439	0.0237006	0.0993104
EPB41L5	EPB41L5	grey	grey	-0.0131039	-0.12647	0.0210666	-0.069696	-0.0922074	0.102459	-0.070028	0.130037
RALB	RALB	turquoise	turquoise	0.0942544	0.0125518	-0.0301461	0.00300733	0.00200403	0.105707	0.00449229	0.0415378
CLASP1	CLASP1	grey	grey	0.0413121	-0.157486	0.0756445	-0.125974	-0.169836	0.235217	-0.104483	0.274788
TSN	TSN	brown	brown	0.0567247	0.147731	0.044642	0.158905	0.159001	-0.0590708	0.162616	-0.0639308
CNTNAP5	CNTNAP5	blue	blue	0.0976745	0.107454	0.371404	0.0284404	-0.0604649	-0.105173	-0.00531095	0.0515565
BIN1	BIN1	turquoise	turquoise	0.230181	0.0488814	-0.0824686	-0.0661767	-0.0416455	0.252444	-0.0162405	0.0901999
ERCC3	ERCC3	grey	grey	-0.0156866	-0.0979251	-0.0133549	-0.0259539	-0.0387023	0.0929038	-0.0526504	0.103937
MAP3K2	MAP3K2	turquoise	turquoise	0.025505	-0.152193	-0.0191847	-0.137574	-0.13497	0.270663	-0.088001	0.255366
IWS1	IWS1	turquoise	turquoise	0.0571641	-0.0359071	0.0270169	-0.0668892	-0.0683486	0.151309	-0.0175281	0.146288
WDR33	WDR33	turquoise	turquoise	0.196247	0.138239	0.0986324	-0.0193467	-0.0155652	0.132492	0.0389857	0.0982755
AMMECR1L	AMMECR1L	grey	grey	0.116347	0.110556	0.0507298	0.0115641	0.0175058	0.0491271	0.0496377	0.0187867
SAP130	SAP130	turquoise	turquoise	0.141475	0.0660564	0.0565104	-0.0384319	-0.0320958	0.127876	0.016668	0.0884087
UGGT1	UGGT1	turquoise	turquoise	0.116601	0.039216	0.0462793	-0.0113603	-0.0246529	0.118711	0.0170547	0.0864141
HS6ST1	HS6ST1	yellow	yellow	0.0500885	-0.0683294	-0.0114266	-0.0090606	-0.0489197	0.100726	-0.0461344	0.0645979
SMPD4	SMPD4	grey	grey	0.0660242	0.116031	0.121359	0.021456	0.0171899	-0.00276133	0.0559977	0.048748
PTPN18	PTPN18	turquoise	turquoise	0.0224927	-0.113273	-0.0849949	-0.0722163	-0.0757594	0.163313	-0.0717614	0.10756
ARHGEF4	ARHGEF4	blue	blue	0.0585495	0.0300136	0.124529	0.0902605	0.0210718	-0.0261219	0.0346285	0.020946
FAM168B	FAM168B	yellow	yellow	0.0900011	0.0284521	0.0407827	0.0439869	0.00846793	0.065682	0.0383186	0.0414125
PLEKHB2	PLEKHB2	brown	brown	0.00481867	-0.0636922	0.0343149	0.0968459	0.0100654	0.0275807	0.00191994	0.0399915
MZT2A	MZT2A	grey	grey	-0.0151577	-0.0374081	-0.00532899	0.0432918	0.041186	0.0286847	0.0215689	0.0339501
NCKAP5	NCKAP5	red	red	-0.075989	-0.350094	-0.0547087	-0.193251	-0.215281	0.315812	-0.183475	0.393654
MGAT5	MGAT5	turquoise	turquoise	0.0871475	-0.201231	-0.0727249	-0.188177	-0.167449	0.427329	-0.105784	0.329388
TMEM163	TMEM163	red	red	-0.0930052	-0.219848	-0.048903	-0.122347	-0.0995169	0.237217	-0.07381	0.271825
CCNT2	CCNT2	turquoise	turquoise	0.173999	0.123082	0.0946192	-0.014517	-0.0133027	0.134414	0.0535291	0.107624
RAB3GAP1	RAB3GAP1	turquoise	turquoise	0.137777	0.00153876	0.054761	-0.0286191	-0.0447268	0.197624	-0.00599327	0.164233
ZRANB3	ZRANB3	grey	grey	-0.0036828	-0.11138	0.0459759	-0.0653738	-0.0929392	0.0931505	-0.0665949	0.129256
R3HDM1	R3HDM1	blue	blue	0.190416	0.219238	0.371279	0.0681769	-0.0193171	-0.0478841	0.0631083	0.0782075
UBXN4	UBXN4	grey	grey	0.12476	0.0648841	0.0674411	0.0109191	0.0129033	0.101204	0.0583202	0.0759507
DARS1	DARS1	turquoise	turquoise	0.0454854	-0.068973	-0.0189623	-0.067409	-0.0656239	0.16484	-0.0306442	0.134124
THSD7B	THSD7B	blue	blue	0.142457	0.224176	0.267856	0.0265759	-0.00362095	-0.0340252	0.0827028	0.0679719
HNMT	HNMT	turquoise	turquoise	0.0453057	-0.0406939	-0.0251397	-0.0353835	-0.0330816	0.134051	-0.0287588	0.111631
SPOPL	SPOPL	turquoise	turquoise	0.0949839	-0.0132525	-0.00532654	-0.0507703	-0.0487506	0.173301	-0.0281913	0.132577
LRP1B	LRP1B	blue	blue	0.167111	0.235894	0.501759	0.0263628	-0.0790927	-0.152704	0.031139	0.0640227
KYNU	KYNU	turquoise	turquoise	-0.0902153	-0.230708	-0.117246	-0.115916	-0.108092	0.22755	-0.109273	0.211759
ARHGAP15	ARHGAP15	red	red	-0.130552	-0.332743	-0.161836	-0.21579	-0.1712	0.422975	-0.151226	0.452367
GTDC1	GTDC1	turquoise	turquoise	0.214698	0.0777312	0.119309	-0.0615692	-0.0801375	0.181064	-0.00485264	0.136043
ZEB2	ZEB2	turquoise	turquoise	0.337239	0.0963871	-0.0591473	-0.14062	-0.0922251	0.370299	-0.013267	0.15872
ACVR2A	ACVR2A	grey	grey	0.12825	0.0650991	0.0990024	-0.0146075	-0.0344966	0.0868242	0.00730831	0.0804705
ORC4	ORC4	grey	grey	0.132315	0.0991962	0.11674	0.0161155	-0.00646958	0.0572833	0.0374014	0.0649597
MBD5	MBD5	grey	grey	0.153448	0.000868218	0.166187	-0.113509	-0.146057	0.19496	-0.0711119	0.229441
EPC2	EPC2	turquoise	turquoise	0.0768128	-0.043474	0.00975092	-0.0400094	-0.0512549	0.156097	-0.0311871	0.130654
KIF5C	KIF5C	blue	blue	0.0912605	0.24546	0.224103	0.279219	0.213754	-0.133332	0.23352	-0.0535652
MMADHC	MMADHC	grey	grey	0.0466868	0.0332278	0.0172147	0.0417075	0.0373399	0.0212814	0.0408491	0.00397615
RIF1	RIF1	grey	grey	0.0513318	-0.0797553	0.0180704	-0.0547274	-0.0770324	0.137601	-0.0434811	0.125001
ARL5A	ARL5A	grey	grey	0.0165635	-0.0879163	-0.0387879	-0.0343361	-0.0489628	0.160826	-0.0454779	0.163194
CACNB4	CACNB4	red	red	0.206952	0.381251	0.388199	0.130112	0.100278	-0.0550132	0.182949	0.0982084
STAM2	STAM2	turquoise	turquoise	0.0846704	-0.0153341	0.0263171	-0.0460258	-0.0586046	0.156656	-0.0214963	0.139168
FMNL2	FMNL2	turquoise	turquoise	-0.0178231	-0.312745	-0.00914948	-0.256302	-0.269132	0.374011	-0.197906	0.411534
PRPF40A	PRPF40A	turquoise	turquoise	0.131738	0.0783524	0.0653271	-0.0106021	-0.00298617	0.13087	0.0367665	0.0970894
ARL6IP6	ARL6IP6	grey	grey	0.0388306	-0.0263086	-0.00571533	-0.0231284	-0.03096	0.0947084	-0.00953433	0.082047
GALNT13	GALNT13	blue	blue	0.165122	0.185943	0.403994	0.0382767	-0.052323	-0.0583186	0.0432608	0.0973113
KCNJ3	KCNJ3	blue	blue	0.166356	0.23365	0.41705	0.086306	-0.0265335	-0.114702	0.0477952	0.0506157
NR4A2	NR4A2	grey	grey	-0.122766	-0.272216	-0.130938	-0.140934	-0.0870831	0.253899	-0.022595	0.200869
GPD2	GPD2	grey	grey	-0.038548	-0.175601	-0.0445691	-0.0719888	-0.0619386	0.232272	-0.0234715	0.232823
ACVR1C	ACVR1C	blue	blue	0.0752428	0.097999	0.142699	0.0703339	0.0329812	-0.0407898	0.0607792	-0.00258712
ACVR1	ACVR1	turquoise	turquoise	0.215801	0.182341	0.0927166	-0.0265487	-0.0185274	0.101865	0.0442879	0.0484356
UPP2	UPP2	grey	grey	0.26127	0.36968	0.305829	0.0695381	0.0585537	-0.0370845	0.152846	0.00918541
CCDC148	CCDC148	blue	blue	0.148448	0.230061	0.297577	0.0364876	0.00573769	-0.0459416	0.0815672	0.0616281
PKP4	PKP4	blue	blue	0.138309	0.0737263	0.200995	0.00395059	-0.0459548	0.0439202	0.0321233	0.0858018
TANC1	TANC1	red	red	-0.0744344	-0.246029	-0.0769207	-0.141025	-0.126826	0.27446	-0.131003	0.352758
WDSUB1	WDSUB1	turquoise	turquoise	0.0162245	-0.0855567	-0.0138581	-0.0451913	-0.0564669	0.121195	-0.0441825	0.117892
BAZ2B	BAZ2B	turquoise	turquoise	0.152979	-0.0698254	0.0143396	-0.161448	-0.162241	0.30515	-0.0895098	0.263482
RBMS1	RBMS1	grey	grey	0.0351211	-0.0763662	-0.00173376	-0.0588128	-0.0538582	0.189766	-0.0102698	0.177745
TANK	TANK	turquoise	turquoise	0.0372449	-0.084406	-0.0360165	-0.079467	-0.0582799	0.23123	-0.0263899	0.189157
PSMD14	PSMD14	grey	grey	0.118188	0.134804	0.113419	0.0674259	0.0697271	0.0376071	0.0850914	0.0533677
TBR1	TBR1	grey	grey	0.061889	0.18818	0.068378	0.15137	0.157836	-0.0661734	0.169302	-0.0689567
SLC4A10	SLC4A10	blue	blue	0.0972046	0.124724	0.368178	0.0676957	-0.0593913	-0.118223	0.00315558	0.0397897
GCA	GCA	grey	grey	-0.00476302	-0.0888405	0.0220947	-0.0522858	-0.0634864	0.114201	-0.0462164	0.143265
KCNH7	KCNH7	blue	blue	0.232712	0.451285	0.499387	0.169842	0.0965222	-0.19472	0.179586	-0.0136535
FIGN	FIGN	blue	blue	0.0759461	-0.0176161	0.0786893	-0.0431346	-0.0559803	0.051942	-0.0132497	0.0684824
GRB14	GRB14	blue	blue	0.127946	0.215916	0.152476	0.0817429	0.0881567	-0.0413645	0.126869	-0.00575878
COBLL1	COBLL1	grey	grey	0.0662905	0.0591915	0.0368001	0.0274194	0.0302085	0.0165117	0.064412	0.0121735
SCN3A	SCN3A	blue	blue	0.0766652	0.0705551	0.257866	0.0516807	-0.0308111	-0.0499077	0.0146096	0.0570265
SCN2A	SCN2A	blue	blue	0.0878349	0.127769	0.288092	0.210304	0.0674092	-0.126924	0.0745698	-0.0106479
CSRNP3	CSRNP3	blue	blue	0.108226	0.108094	0.345721	0.0862469	-0.0591646	-0.0843562	0.00310273	0.0607869
TTC21B	TTC21B	grey	grey	0.04427	-0.0593675	0.0719217	-0.0538014	-0.0732654	0.118482	-0.0286096	0.140478
SCN1A	SCN1A	blue	blue	0.0834689	0.0983683	0.277847	0.098259	-0.00999329	-0.0915265	0.0280878	0.0275436
B3GALT1	B3GALT1	blue	blue	0.323184	0.558232	0.467742	0.117452	0.103755	-0.0936287	0.23331	0.0446738
STK39	STK39	blue	blue	0.123422	0.160971	0.257857	0.0361534	-0.00574827	-0.0190984	0.0859301	0.0728016
CERS6	CERS6	blue	blue	0.0732564	-0.0109667	0.197101	-0.0334587	-0.103848	0.078227	-0.0493985	0.148198
FASTKD1	FASTKD1	grey	grey	-0.0348293	-0.15118	-0.0368121	-0.0627136	-0.07484	0.143459	-0.0727263	0.152841
PPIG	PPIG	grey	grey	0.0497469	-0.00524576	0.0495179	0.0056709	-0.0110797	0.0817234	0.0130236	0.0812984
KLHL23	KLHL23	grey	grey	0.0508686	0.0370336	0.084358	0.0634901	0.020962	-0.0208956	0.0371432	0.00552009
SSB	SSB	grey	grey	0.109363	0.249391	0.0286925	0.196307	0.229429	-0.068212	0.225019	-0.120949
METTL5	METTL5	grey	grey	0.0921545	0.0991203	0.0173621	0.0375942	0.0523256	0.0236688	0.0632143	-0.0126877
UBR3	UBR3	yellow	yellow	0.130242	-0.0110902	0.146971	-0.049103	-0.101296	0.141786	-0.0354658	0.169392
GAD1	GAD1	brown	brown	0.0754556	0.117272	0.106575	0.139688	0.0820749	-0.0839508	0.0875688	-0.072251
GORASP2	GORASP2	turquoise	turquoise	0.0822786	0.0618317	0.0257627	0.0267678	0.0369416	0.0671918	0.05039	0.0418103
TLK1	TLK1	yellow	yellow	0.0978717	-0.0303299	0.0730877	-0.0231979	-0.0617712	0.140208	-0.0211383	0.146276
METTL8	METTL8	turquoise	turquoise	0.05159	-0.0251551	0.0134774	-0.04491	-0.0450778	0.128815	-0.0185265	0.117085
DCAF17	DCAF17	yellow	yellow	0.198491	0.160024	0.0618714	0.00508475	0.0165855	0.0542602	0.0577337	-0.00421006
DYNC1I2	DYNC1I2	grey	grey	0.205526	0.326065	0.190017	0.155695	0.161975	-0.0238958	0.207547	-0.0086885
SLC25A12	SLC25A12	blue	blue	0.1103	0.07137	0.201421	0.0052693	-0.0502191	0.0263406	0.000250052	0.089403
HAT1	HAT1	turquoise	turquoise	0.0462967	0.0150929	-0.0186004	0.00159861	0.0210692	0.090713	0.0390168	0.0562651
METAP1D	METAP1D	turquoise	turquoise	0.211705	0.18618	0.0569401	-0.00456355	0.0187904	0.0725713	0.0590739	-0.00407636
ITGA6	ITGA6	turquoise	turquoise	0.270617	0.185513	-0.0752739	-0.00711174	0.0427729	0.119156	0.0704714	-0.0749779
PDK1	PDK1	turquoise	turquoise	0.171356	0.150182	0.0393224	0.0138825	0.0332182	0.0793233	0.075144	0.0111716
RAPGEF4	RAPGEF4	blue	blue	0.146684	0.255619	0.398322	0.108098	0.0327213	-0.114247	0.119365	0.0551529
MAP3K20	MAP3K20	turquoise	turquoise	0.0317057	-0.0391877	-0.035187	-0.0211781	-0.0158926	0.11969	-0.00121276	0.0935548
SP3	SP3	turquoise	turquoise	0.0441954	-0.0930968	-0.039289	-0.0866368	-0.0767925	0.194006	-0.0446162	0.145159
OLA1	OLA1	grey	grey	0.0540137	0.0271304	0.0686713	0.0217433	0.021436	0.0889583	0.056981	0.104772
CIR1	CIR1	grey	grey	0.0415778	0.0452002	0.0241441	0.0617953	0.077003	0.0431103	0.0807961	0.0341448
GPR155	GPR155	grey	grey	0.0743843	-0.0383732	0.0332911	0.00164736	-0.041187	0.0994008	-0.0247618	0.0713917
WIPF1	WIPF1	turquoise	turquoise	0.212193	-0.0228426	-0.173863	-0.138978	-0.0825214	0.322926	-0.046759	0.115007
CHN1	CHN1	blue	blue	-0.0224595	-0.0914742	0.229177	0.237606	-0.0157457	-0.134955	-0.0469552	0.0171855
ATF2	ATF2	grey	grey	0.155616	0.119299	0.12822	0.0250678	-0.00444387	0.0786533	0.0438725	0.0832612
ATP5MC3	ATP5MC3	brown	brown	0.0302981	0.221056	0.0203572	0.317141	0.332372	-0.148597	0.275519	-0.161082
LNPK	LNPK	blue	blue	0.107506	0.112057	0.145981	0.0471767	0.0134652	0.0125314	0.0570573	0.0501006
MTX2	MTX2	grey	grey	0.033003	-0.0361785	0.0711648	0.00856399	-0.0467831	0.040886	-0.0292881	0.0709276
HNRNPA3	HNRNPA3	grey	grey	0.109029	0.0234688	-0.0115429	0.0392908	0.0238772	0.131717	0.0458703	0.0571695
NFE2L2	NFE2L2	turquoise	turquoise	-0.0091217	-0.241956	-0.180483	-0.154171	-0.102962	0.358559	-0.0623222	0.235689
AGPS	AGPS	turquoise	turquoise	0.206322	0.0795049	-0.0273612	-0.0497781	-0.027782	0.174719	0.00677758	0.041202
OSBPL6	OSBPL6	blue	blue	0.0790699	0.0429052	0.267088	0.00101334	-0.0702575	0.0733013	-0.0170448	0.22178
PRKRA	PRKRA	grey	grey	0.0228364	-0.0608059	-0.0123778	-0.00657936	-0.014466	0.0833938	-0.00165855	0.0704407
PLEKHA3	PLEKHA3	grey	grey	0.0427673	0.00929456	0.0354842	0.0347847	0.00562148	0.0283951	0.0173304	0.0264677
SESTD1	SESTD1	blue	blue	0.0635478	-0.00312341	0.17626	0.0036829	-0.0557599	0.0259452	-0.000802461	0.0882625
ZNF385B	ZNF385B	blue	blue	0.155511	0.257868	0.418422	0.0504213	-0.0227077	-0.0889271	0.0705729	0.0791066
CWC22	CWC22	grey	grey	0.0564802	0.0108779	0.0354206	-0.00991413	-0.0166499	0.0908998	0.00159714	0.083202
UBE2E3	UBE2E3	green	green	0.0547036	-0.0199119	0.0355815	0.0339441	0.0185874	0.103153	0.0253045	0.0994314
ITPRID2	ITPRID2	yellow	yellow	0.111633	-0.0150609	0.0100492	-0.0488495	-0.0633792	0.0858393	-0.0303941	0.0373844
PDE1A	PDE1A	blue	blue	0.145143	0.281154	0.385299	0.137443	0.0772797	-0.123783	0.145488	0.0359525
DNAJC10	DNAJC10	grey	grey	0.0163843	-0.0589018	0.0355041	0.00103621	-0.0244436	0.103728	-0.0213008	0.138461
NCKAP1	NCKAP1	blue	blue	0.122355	0.149474	0.250989	0.168699	0.0525008	-0.0978512	0.0938538	-0.00486352
NUP35	NUP35	grey	grey	0.0561482	0.0800652	0.0535745	0.0311116	0.0431079	0.0190694	0.0535101	0.0176656
ZNF804A	ZNF804A	blue	blue	0.077106	0.0690021	0.274369	0.0150501	-0.0719978	-0.0582612	-0.0144636	0.0646782
ZC3H15	ZC3H15	green	green	0.0936987	0.188499	0.063304	0.162978	0.188828	-0.000536157	0.23716	-0.017598
ITGAV	ITGAV	turquoise	turquoise	0.136237	-0.0177491	-0.0371836	-0.0862319	-0.0717754	0.222959	-0.0231426	0.12925
FAM171B	FAM171B	brown	brown	0.107017	0.207048	0.220685	0.231821	0.152963	-0.124285	0.166086	-0.0527604
GULP1	GULP1	blue	blue	0.00496085	-0.0622307	0.0844838	-0.00846192	-0.0642987	-0.00365001	-0.0369151	0.035206
WDR75	WDR75	grey	grey	0.0377068	0.00563178	0.036814	0.00231736	-0.000185994	0.0690889	0.00690341	0.075563
SLC40A1	SLC40A1	yellow	yellow	0.182754	0.0906218	-0.0675888	-0.0171667	0.000768702	0.0738026	0.0108289	-0.0556347
ANKAR	ANKAR	grey	grey	-0.0666721	-0.211587	-0.0396789	-0.101542	-0.116483	0.146062	-0.114231	0.175424
ORMDL1	ORMDL1	grey	grey	-0.0509862	-0.1731	-0.0477282	-0.0441355	-0.060772	0.130006	-0.0627849	0.139106
PMS1	PMS1	turquoise	turquoise	-0.0119498	-0.157617	-0.0342328	-0.0860672	-0.0969735	0.193019	-0.0894384	0.202169
HIBCH	HIBCH	turquoise	turquoise	0.00511202	-0.164973	0.00309975	-0.0919519	-0.109279	0.193279	-0.0772626	0.209352
INPP1	INPP1	grey	grey	0.0620293	0.0599337	0.0574025	0.040067	0.0324278	0.00854781	0.0567097	0.0131341
MFSD6	MFSD6	blue	blue	0.0577191	0.0498213	0.110868	0.0767229	0.025791	-0.00377236	0.050145	0.0448528
NAB1	NAB1	grey	grey	0.0349391	-0.0272582	0.0185043	-0.0337845	-0.0297721	0.0980087	-0.00193967	0.0923428
GLS	GLS	grey	grey	0.0925778	0.00583682	0.159424	0.0258383	-0.032783	0.12717	0.0180344	0.17183
STAT1	STAT1	turquoise	turquoise	0.0327651	-0.0896379	-0.0696894	-0.0576165	-0.032873	0.187274	-0.00898008	0.123872
MYO1B	MYO1B	yellow	yellow	0.197801	0.151715	0.0698906	0.0371762	0.0211097	0.0153967	0.0564587	-0.0513951
NABP1	NABP1	grey	grey	-0.0458682	-0.153301	-0.076493	-0.0690188	-0.0541584	0.201655	-0.0336719	0.176231
TMEFF2	TMEFF2	blue	blue	0.221453	0.283653	0.367874	0.0482339	0.00648106	-0.0300951	0.117082	0.085001
SLC39A10	SLC39A10	brown	brown	0.0285655	0.0101345	0.06839	0.133926	0.0571915	0.0126648	0.0508131	0.0514968
STK17B	STK17B	turquoise	turquoise	-0.0115022	-0.151002	-0.111623	-0.106032	-0.0677908	0.222105	-0.00724405	0.118249
HECW2	HECW2	blue	blue	0.214338	0.247113	0.42672	0.0042457	-0.0578255	-0.0337965	0.064623	0.12167
GTF3C3	GTF3C3	grey	grey	0.0703745	0.0568085	0.0529592	0.0106703	0.0136501	0.0525413	0.0393046	0.0436324
PGAP1	PGAP1	blue	blue	0.0766641	0.0444658	0.141339	0.0251376	-0.0258451	-0.00551761	0.01001	0.028305
ANKRD44	ANKRD44	turquoise	turquoise	0.0920799	-0.282698	-0.252525	-0.265751	-0.230106	0.497979	-0.217393	0.324599
SF3B1	SF3B1	yellow	yellow	0.200406	0.13942	0.0298481	0.0284147	0.0485278	0.094326	0.0930938	0.0183439
COQ10B	COQ10B	grey	grey	0.0478612	0.0410927	0.0329613	0.0197763	0.0257294	0.0486423	0.048597	0.042311
HSPD1	HSPD1	green	green	-0.0324494	-0.0446016	-0.0709974	0.0587761	0.103237	0.13179	0.141394	0.0954936
HSPE1	HSPE1	green	green	0.0620331	0.25317	0.0192906	0.232765	0.295653	-0.109775	0.306222	-0.139329
MOB4	MOB4	grey	grey	0.166932	0.246486	0.085485	0.121812	0.131113	-0.0481243	0.154664	-0.083513
PLCL1	PLCL1	yellow	yellow	0.468796	0.233067	-0.00397379	-0.0861964	-0.0530679	0.194888	0.0372442	-0.0544747
SATB2	SATB2	blue	blue	0.10034	0.126069	0.318675	0.055656	-0.0349237	-0.0685074	0.0184887	0.0730709
SPATS2L	SPATS2L	grey	grey	0.00886557	-0.0963427	0.0883261	-0.0323715	-0.0674065	0.113396	-0.0348283	0.163935
BZW1	BZW1	green	green	0.0846176	0.186346	0.0377612	0.158582	0.186149	-0.0367379	0.220133	-0.0646296
CLK1	CLK1	yellow	yellow	0.297936	0.212109	0.0705497	-0.0180025	0.0035248	0.130904	0.079771	0.0260448
ORC2	ORC2	grey	grey	0.107254	0.0658774	0.111458	-0.00323537	-0.011801	0.0781406	0.0354674	0.0950636
NDUFB3	NDUFB3	brown	brown	0.0702863	0.246963	0.0146413	0.245704	0.307502	-0.10429	0.275591	-0.139986
CFLAR	CFLAR	turquoise	turquoise	0.147404	-0.0710573	-0.164226	-0.121901	-0.0734	0.300356	-0.0492093	0.114463
CASP8	CASP8	turquoise	turquoise	0.192583	0.0707131	-0.109495	-0.0657291	-0.0248404	0.151887	-0.00522572	-0.0296912
TRAK2	TRAK2	grey	grey	0.0625555	0.0125147	0.0883303	0.0306796	-0.0165216	0.0297408	0.00661348	0.0495706
ALS2	ALS2	yellow	yellow	0.059866	-0.0262149	0.0610092	-0.0185449	-0.0523308	0.0690123	-0.0266063	0.0780936
SUMO1	SUMO1	grey	grey	0.155536	0.265323	0.0859064	0.158213	0.198977	-0.0318539	0.217459	-0.0622677
NOP58	NOP58	green	green	0.0059701	-0.0727579	-0.0110631	-0.0188344	-0.0032383	0.14115	0.015935	0.118622
BMPR2	BMPR2	yellow	yellow	0.089663	-0.0516367	0.0516028	-0.0121059	-0.0654828	0.143819	-0.0269522	0.13837
FAM117B	FAM117B	turquoise	turquoise	0.197806	0.16111	0.0597188	0.00499319	0.0144149	0.0751633	0.0568154	-0.00110325
ICA1L	ICA1L	blue	blue	0.0660367	0.0187437	0.177654	0.00874723	-0.0371747	0.00729808	-0.000218963	0.0773226
WDR12	WDR12	grey	grey	0.0709447	0.0901715	0.0384948	0.0531988	0.0514323	0.00963444	0.0602773	-0.00195063
CARF	CARF	grey	grey	0.0584763	-0.00185183	0.0536341	-0.0172826	-0.0361591	0.0846857	-0.00549181	0.101093
NBEAL1	NBEAL1	grey	grey	0.157345	0.117274	0.0931975	-0.0152032	-0.00491678	0.101788	0.0539441	0.0885923
CYP20A1	CYP20A1	grey	grey	-0.00673917	-0.0991722	-0.0171332	-0.0675455	-0.0654695	0.134981	-0.0546504	0.144209
ABI2	ABI2	blue	blue	0.0987786	0.0776397	0.220618	0.0777037	-0.00252359	0.0151214	0.0400936	0.100953
RAPH1	RAPH1	grey	grey	0.0695814	-0.0108426	0.14683	-0.0239633	-0.0649669	0.160324	-0.00948685	0.227509
PARD3B	PARD3B	turquoise	turquoise	0.225008	0.0406051	-0.0762395	-0.0785325	-0.0496462	0.208893	-0.00817226	0.0479631
NRP2	NRP2	turquoise	turquoise	0.0402298	-0.0634294	-0.0489943	-0.0706071	-0.0504979	0.212287	-0.0153856	0.167211
INO80D	INO80D	grey	grey	0.272216	0.345783	0.128658	0.0839776	0.106476	-0.00888502	0.160337	-0.0747537
NDUFS1	NDUFS1	grey	grey	0.185263	0.328261	0.126375	0.121512	0.150881	-0.0574089	0.199397	-0.0793088
ADAM23	ADAM23	blue	blue	0.0857246	0.105042	0.287149	0.0700654	-0.023571	-0.0643829	0.0219893	0.0565452
FASTKD2	FASTKD2	grey	grey	0.011648	-0.0393567	0.0395318	-0.00418619	-0.0201338	0.0690474	-0.0087759	0.0925323
KLF7	KLF7	grey	grey	0.146631	0.0941036	0.0610656	0.00748343	0.00402249	0.128657	0.0601752	0.0953252
CREB1	CREB1	turquoise	turquoise	0.17182	0.0508602	-0.0159111	-0.0237031	-0.0186313	0.177643	0.0156405	0.0815397
METTL21A	METTL21A	turquoise	turquoise	-0.017438	-0.132089	-0.0629782	-0.0588695	-0.0503583	0.16234	-0.0531434	0.150644
CCNYL1	CCNYL1	grey	grey	0.0352961	-0.0257236	0.0568373	-0.0236496	-0.0365951	0.0708537	-0.0155682	0.0865804
PLEKHM3	PLEKHM3	turquoise	turquoise	0.227349	0.133424	0.0899425	-0.0123405	-0.0192621	0.13437	0.0384826	0.0766263
IDH1	IDH1	grey	grey	0.0497254	-0.00693429	-0.0262328	-0.0133951	-0.00269406	0.109335	0.0087639	0.0784258
PIKFYVE	PIKFYVE	grey	grey	0.0367036	-0.0873352	0.00926093	-0.057991	-0.0674266	0.173704	-0.0416965	0.169825
MAP2	MAP2	blue	blue	0.0515112	0.0591767	0.343615	0.203729	0.00515371	-0.155547	0.0211232	0.0132651
UNC80	UNC80	blue	blue	0.133147	0.240746	0.400075	0.11693	0.022006	-0.120876	0.0964133	0.0507817
KANSL1L	KANSL1L	turquoise	turquoise	0.249766	0.166896	0.104107	-0.0780045	-0.0647743	0.14783	0.0201806	0.0889249
LANCL1	LANCL1	brown	brown	0.0468472	0.00252647	0.110755	0.0793418	0.0127231	-0.00160542	0.028428	0.0490574
ERBB4	ERBB4	blue	blue	0.0338646	-0.135506	0.217379	-0.0384564	-0.211413	-0.0783903	-0.17171	0.0247556
IKZF2	IKZF2	turquoise	turquoise	0.137851	0.0315063	-0.0337083	-0.0686403	-0.0430815	0.155682	0.00495157	0.0620711
SPAG16	SPAG16	grey	grey	-0.0435926	-0.188355	0.0369573	-0.0605372	-0.111727	0.05928	-0.112865	0.102329
PECR	PECR	yellow	yellow	0.131895	0.06286	-0.00247668	-0.027135	-0.0145944	0.0772294	-0.0012961	0.0156788
XRCC5	XRCC5	turquoise	turquoise	-0.0266876	-0.243748	-0.0480823	-0.0996641	-0.129533	0.259824	-0.120305	0.264371
SMARCAL1	SMARCAL1	grey	grey	0.0363626	-0.0272993	0.0309955	-0.0328892	-0.0321526	0.106339	-0.0204027	0.123312
TNS1	TNS1	turquoise	turquoise	0.184409	0.126945	-0.0457028	0.00674013	0.0422869	0.0700099	0.0796549	-0.0621647
ARPC2	ARPC2	green	green	0.0601581	0.064576	-0.0428482	0.071213	0.129448	0.121345	0.151314	0.0601211
AAMP	AAMP	grey	grey	0.0722199	0.155023	0.0451449	0.153267	0.153136	-0.0507733	0.148754	-0.0579199
PNKD	PNKD	green	green	0.0495497	0.054868	0.0912121	0.089694	0.0684482	0.014048	0.0956792	0.045462
TMBIM1	TMBIM1	grey	grey	0.0593494	0.0154074	0.0337703	-0.03558	-0.0208932	0.121076	0.0128258	0.116731
SLC11A1	SLC11A1	turquoise	turquoise	-0.091422	-0.283449	-0.155982	-0.204699	-0.137892	0.343087	-0.0820866	0.255762
USP37	USP37	turquoise	turquoise	0.0914989	0.0152458	0.0690177	-0.0521315	-0.0513701	0.13822	0.00190411	0.134251
CNOT9	CNOT9	grey	grey	0.0479137	-0.0141341	0.032028	-0.00560042	-0.0208845	0.0770133	0.0125774	0.0755559
RNF25	RNF25	grey	grey	0.161681	0.207078	0.133246	0.0407309	0.0308376	-0.00568876	0.0847939	-0.00063831
TTLL4	TTLL4	turquoise	turquoise	0.117029	0.0712889	0.0413413	-0.0336669	-0.0278966	0.0882156	0.0143215	0.0661227
CYP27A1	CYP27A1	grey	grey	0.1086	0.0333323	-0.0583682	-0.0348327	-0.0110695	0.108955	0.0191172	0.0163387
CDK5R2	CDK5R2	brown	brown	0.0187834	0.0662263	0.0523572	0.193738	0.107728	-0.104054	0.089094	-0.0883501
RETREG2	RETREG2	brown	brown	-0.000623648	0.0150386	0.0316768	0.126996	0.0796856	-0.0365229	0.0512098	-0.0121682
TUBA4A	TUBA4A	black	black	0.0107306	0.178901	0.00286399	0.302731	0.355819	-0.109758	0.261852	-0.11937
DNAJB2	DNAJB2	grey	grey	0.0306164	-0.0383868	0.0449745	0.0400071	-0.0400943	-0.0196118	-0.0316675	-0.000874268
PTPRN	PTPRN	blue	blue	0.157196	0.331711	0.291589	0.263936	0.189552	-0.152846	0.20955	-0.0545063
RESP18	RESP18	grey	grey	0.040696	0.214353	0.0318625	0.179482	0.225971	-0.109522	0.216741	-0.118521
SPEG	SPEG	blue	blue	0.137373	0.235226	0.218383	0.094172	0.0749706	-0.0527365	0.122586	0.0124544
SLC4A3	SLC4A3	blue	blue	0.100797	0.218557	0.185077	0.15031	0.125923	-0.0824428	0.154639	-0.0212741
EPHA4	EPHA4	blue	blue	0.0920255	0.14035	0.228809	0.168579	0.0680409	-0.105377	0.0723312	-0.0208945
FARSB	FARSB	grey	grey	0.0925176	0.0694596	0.0884871	0.0298133	0.0120825	0.0553056	0.0455443	0.0606137
ACSL3	ACSL3	brown	brown	0.0019469	-0.0949456	0.0548782	0.0597733	-0.00827094	0.0603243	-0.00685384	0.0905004
SCG2	SCG2	brown	brown	0.0143597	0.0608602	0.0483896	0.216337	0.146641	-0.113195	0.0966827	-0.100626
SERPINE2	SERPINE2	yellow	yellow	0.164864	0.0782606	0.102261	0.138092	0.0174681	-0.0733387	0.0211757	-0.104931
CUL3	CUL3	turquoise	turquoise	0.0686737	-0.0450524	0.0062294	-0.0280813	-0.0290924	0.187813	0.012	0.155705
DOCK10	DOCK10	turquoise	turquoise	0.238696	-0.108928	-0.214698	-0.228068	-0.169918	0.464485	-0.126408	0.233249
NYAP2	NYAP2	blue	blue	0.196022	0.348611	0.403887	0.082303	0.0416907	-0.0895016	0.132113	0.0505576
RHBDD1	RHBDD1	turquoise	turquoise	0.0114863	-0.157435	-0.0691603	-0.104149	-0.100678	0.217803	-0.0916994	0.178781
MFF	MFF	green	green	0.0727668	0.0876369	0.058614	0.0930901	0.0982919	0.0394983	0.132336	0.0356753
AGFG1	AGFG1	grey	grey	0.0462119	-0.0491591	0.0549022	-0.00779335	-0.0268983	0.128507	0.0104223	0.127564
SPHKAP	SPHKAP	blue	blue	0.159483	0.338414	0.300236	0.151802	0.128925	-0.114967	0.1851	-0.0150441
PID1	PID1	turquoise	turquoise	0.323506	0.240775	0.0769268	-0.0157933	-0.00170997	0.138929	0.0633529	-0.00290571
DNER	DNER	blue	blue	0.0563154	-0.00071469	0.164123	0.0630757	-0.0379096	-0.0534274	-0.0180851	0.0204444
TRIP12	TRIP12	turquoise	turquoise	0.153486	0.00108271	0.0642597	-0.0618038	-0.0640752	0.246785	-0.000402126	0.213356
SP110	SP110	turquoise	turquoise	-0.0521469	-0.201133	-0.134527	-0.113241	-0.0892006	0.246221	-0.0956011	0.205539
SP140L	SP140L	turquoise	turquoise	-0.00404285	-0.110638	-0.0855294	-0.0686129	-0.0580441	0.154696	-0.0547336	0.11234
SP100	SP100	turquoise	turquoise	-0.131363	-0.354117	-0.17713	-0.197133	-0.17162	0.352992	-0.175538	0.335491
CAB39	CAB39	turquoise	turquoise	0.0314913	-0.113937	-0.0244798	-0.0429396	-0.0674678	0.223568	-0.0491009	0.20658
ITM2C	ITM2C	brown	brown	0.0522742	0.160853	0.0362252	0.303539	0.258647	-0.0991903	0.219551	-0.108703
PSMD1	PSMD1	grey	grey	0.0924983	0.0685605	0.0738038	0.0541051	0.0379578	0.0953688	0.0752933	0.0949672
ARMC9	ARMC9	blue	blue	0.153087	0.232687	0.297525	0.0473759	0.0200646	-0.037765	0.0937147	0.0633528
NCL	NCL	brown	brown	0.0743618	0.197491	0.0226319	0.202444	0.216548	-0.064559	0.192283	-0.0985348
PTMA	PTMA	brown	brown	0.0164005	0.122837	-0.0258782	0.240598	0.259109	-0.0591711	0.237761	-0.092859
PDE6D	PDE6D	green	green	0.0772628	0.0619532	0.0224997	0.019731	0.0317346	0.0692967	0.0617578	0.0485244
COPS7B	COPS7B	grey	grey	0.0524882	-0.0187505	0.0474028	-0.0130939	-0.0399781	0.0727434	-0.032993	0.0891868
DIS3L2	DIS3L2	turquoise	turquoise	0.192887	0.0945458	0.114424	-0.0691293	-0.0654276	0.170495	0.00930833	0.150129
EIF4E2	EIF4E2	turquoise	turquoise	0.117956	0.0992782	0.0352287	0.0402028	0.0424571	0.0585606	0.0691607	0.0194607
GIGYF2	GIGYF2	turquoise	turquoise	0.116113	-0.00749157	0.0715786	-0.078282	-0.0810929	0.198647	-0.0279267	0.199004
NGEF	NGEF	blue	blue	0.0641555	0.149395	0.176442	0.155775	0.103788	-0.0793151	0.107457	-0.000912453
INPP5D	INPP5D	turquoise	turquoise	0.584263	0.47282	-0.152446	0.00662536	0.11899	0.129142	0.163044	-0.313002
DGKD	DGKD	turquoise	turquoise	0.257422	0.157718	0.0187108	-0.0358826	0.00206663	0.184321	0.07181	0.038165
USP40	USP40	turquoise	turquoise	0.147387	0.0591255	0.0588947	-0.0602202	-0.0593298	0.139342	-0.00630988	0.106793
HJURP	HJURP	grey	grey	0.196763	0.270878	0.0998986	0.0669403	0.0768456	-0.0137759	0.128925	-0.0583106
ARL4C	ARL4C	yellow	yellow	0.0431442	-0.0340027	0.0159259	0.0591179	-0.00509333	-0.00573465	-0.00654104	-0.0364315
AGAP1	AGAP1	blue	blue	0.127576	-0.0537025	0.180103	-0.0598465	-0.125906	0.111629	-0.0475763	0.165569
COPS8	COPS8	brown	brown	0.0476026	0.0817009	0.0466974	0.129588	0.104675	-0.0185244	0.107285	-0.018568
LRRFIP1	LRRFIP1	turquoise	turquoise	0.0753622	-0.0282249	0.0824226	-0.0852992	-0.0805616	0.217265	-0.0104314	0.218343
RAMP1	RAMP1	green	green	0.0079084	0.0493094	0.0454358	0.114029	0.125702	0.0135433	0.151398	0.0295331
UBE2F	UBE2F	grey	grey	0.203486	0.267467	0.0869227	0.0678466	0.0879176	-0.00448789	0.13411	-0.0645891
ILKAP	ILKAP	grey	grey	0.0362481	-0.0163961	0.00453642	-0.016857	0.00427243	0.113648	0.0333899	0.106509
PER2	PER2	grey	grey	0.0659356	0.038089	0.0918529	0.0264809	-0.00855671	0.010668	0.00627181	0.0386392
TRAF3IP1	TRAF3IP1	grey	grey	0.0232644	-0.0489504	0.0599356	-0.0137927	-0.0415703	0.0378931	-0.0303895	0.0638591
HDAC4	HDAC4	red	red	0.0475158	-0.0908318	0.0706027	-0.0881169	-0.0955352	0.2343	-0.0281223	0.283058
NDUFA10	NDUFA10	brown	brown	0.0376397	0.0503138	0.062038	0.101961	0.0820183	0.00219012	0.0790172	0.0182213
COPS9	COPS9	black	black	0.00665775	0.0919782	-0.0102804	0.184007	0.236488	-0.0427798	0.182694	-0.0544179
GPC1	GPC1	blue	blue	-0.0128736	-0.0347018	0.0742981	0.0603329	-0.0316637	-0.067426	-0.0292171	-0.0200829
ANKMY1	ANKMY1	grey	grey	-0.0656972	-0.211871	-0.0603311	-0.10309	-0.111974	0.173946	-0.11018	0.194814
KIF1A	KIF1A	blue	blue	0.0769383	0.162075	0.20212	0.296176	0.173917	-0.125797	0.166355	-0.038293
MTERF4	MTERF4	red	red	-0.0158565	-0.073387	-0.0129983	-0.00544205	-0.00224914	0.081689	-0.0312005	0.0970864
PPP1R7	PPP1R7	grey	grey	0.0577093	0.0980858	0.0378422	0.123351	0.128274	0.00137288	0.114177	0.00486813
HDLBP	HDLBP	grey	grey	-0.0982053	-0.292598	-0.0695598	-0.0886929	-0.127636	0.200102	-0.13489	0.222245
FARP2	FARP2	turquoise	turquoise	-0.00138122	-0.130987	-0.015543	-0.0927038	-0.0866009	0.200616	-0.0485677	0.1983
STK25	STK25	brown	brown	0.0634951	0.101968	0.0715768	0.131262	0.0928456	-0.0381106	0.093211	-0.0245631
ATG4B	ATG4B	yellow	yellow	0.0660094	-0.0285935	0.0505693	-0.0189505	-0.0538024	0.0993967	-0.019022	0.104198
DTYMK	DTYMK	grey	grey	0.102796	0.168326	0.0452818	0.078329	0.0989786	-0.0113736	0.121395	-0.0408365
ING5	ING5	grey	grey	-0.00290193	-0.0882727	-0.00168254	-0.0262439	-0.0504122	0.0774846	-0.0385962	0.0875242
D2HGDH	D2HGDH	red	red	-0.0229142	-0.119154	-0.0100191	-0.0493303	-0.0834505	0.0691976	-0.0866807	0.0770127
CHL1	CHL1	blue	blue	0.0437443	0.0027931	0.251155	0.115779	-0.0316146	-0.0927726	-0.0183408	0.0260869
CNTN6	CNTN6	blue	blue	0.122667	0.216382	0.274672	0.0592275	0.0264028	-0.0513929	0.0857304	0.0579365
CNTN4	CNTN4	blue	blue	0.181119	0.326756	0.480725	0.0964569	0.011685	-0.165098	0.0980123	0.0313278
TRNT1	TRNT1	green	green	0.0217092	-0.0155109	-0.00151938	0.0118288	0.016515	0.0761131	0.0241088	0.0648181
CRBN	CRBN	grey	grey	0.0366844	-0.0189314	0.0322553	0.0313339	0.0126268	0.074333	0.0138179	0.0811087
SUMF1	SUMF1	turquoise	turquoise	-0.0813899	-0.320912	-0.0788518	-0.164097	-0.175596	0.296312	-0.174526	0.316626
LRRN1	LRRN1	blue	blue	0.0822622	0.0574455	0.130237	0.0417267	-0.00215912	-0.013544	0.0202048	0.0189515
ITPR1	ITPR1	grey	grey	0.120928	0.182183	0.244815	0.126493	0.0796274	0.00475586	0.125468	0.102074
BHLHE40	BHLHE40	grey	grey	0.0348105	0.0239422	0.0654396	0.0908067	0.0218707	-0.0349422	0.0289348	-0.0221033
ARL8B	ARL8B	grey	grey	0.0504128	-0.0905209	-0.0257561	0.00634398	-0.0288268	0.149184	-0.0157256	0.103048
EDEM1	EDEM1	turquoise	turquoise	0.101948	-0.00266366	-0.0549982	-0.0506909	-0.0347899	0.13556	-0.00900197	0.0388477
GRM7	GRM7	blue	blue	0.226366	0.391675	0.538672	0.133209	0.043762	-0.167358	0.143755	0.0390733
SRGAP3	SRGAP3	red	red	0.102175	0.0787764	0.247953	0.00320521	-0.030059	0.109449	0.0405939	0.237616
THUMPD3	THUMPD3	turquoise	turquoise	0.128059	0.115201	0.0306755	0.00791341	0.0233544	0.0553651	0.0494631	0.00465511
SETD5	SETD5	turquoise	turquoise	0.173924	0.0252544	0.0452469	-0.0702573	-0.0652121	0.212745	-0.0168682	0.157451
LHFPL4	LHFPL4	blue	blue	0.0653655	0.0779128	0.125376	0.0935226	0.0412583	-0.0369416	0.0430631	0.00116478
MTMR14	MTMR14	turquoise	turquoise	0.0190241	-0.1029	-0.0436809	-0.0783449	-0.0628049	0.194038	-0.0501447	0.16565
CAMK1	CAMK1	yellow	yellow	0.274821	0.271897	0.0207019	0.0963838	0.13376	0.0203476	0.167477	-0.107998
TADA3	TADA3	grey	grey	0.0326351	0.0357724	0.0287588	0.0536797	0.0417321	0.0134422	0.0379801	0.0207463
ARPC4	ARPC4	yellow	yellow	0.172351	0.225657	0.00242015	0.0927741	0.126235	-0.0182368	0.129793	-0.122221
EMC3	EMC3	grey	grey	0.0996908	0.141764	0.0605074	0.0864428	0.101241	0.013849	0.114797	0.000415672
BRK1	BRK1	brown	brown	0.0557021	0.146979	0.0369102	0.208207	0.199893	-0.0549347	0.175366	-0.0578698
VHL	VHL	grey	grey	0.0263332	-0.0432399	-0.0136909	-0.0201546	-0.0249634	0.0990112	-0.00980096	0.082489
IRAK2	IRAK2	turquoise	turquoise	0.144546	-0.0427216	-0.163448	-0.123688	-0.0397476	0.32376	0.0346913	0.110849
SEC13	SEC13	green	green	-0.00340132	-0.0358503	-0.0179576	0.00784443	0.0295	0.0812678	0.0403621	0.0663991
ATP2B2	ATP2B2	blue	blue	0.170832	0.324152	0.324064	0.296034	0.19313	-0.175805	0.213577	-0.0751062
SLC6A1	SLC6A1	blue	blue	0.0643114	0.00369913	0.0973005	0.0633688	0.00737293	-0.00745776	0.0174224	0.0106086
ATG7	ATG7	turquoise	turquoise	-0.0478366	-0.292672	-0.0777939	-0.181307	-0.179662	0.330157	-0.155973	0.330354
VGLL4	VGLL4	turquoise	turquoise	0.181293	0.0422154	0.0386515	-0.0331002	-0.0444746	0.157014	-0.0073424	0.0882734
SYN2	SYN2	blue	blue	0.147983	0.268644	0.342362	0.259508	0.140762	-0.180575	0.170682	-0.0535993
PPARG	PPARG	red	red	0.0166018	-0.0158095	0.111125	-0.0680911	-0.0724486	0.121981	-0.0164112	0.193622
TSEN2	TSEN2	grey	grey	0.0812926	0.0336742	0.0739452	0.00240399	-0.00650678	0.0690171	0.0187172	0.0781013
RAF1	RAF1	turquoise	turquoise	0.117811	0.0291708	0.0341424	-0.0448279	-0.026481	0.18605	0.0240329	0.154027
IQSEC1	IQSEC1	blue	blue	0.164248	0.20396	0.343406	0.111445	0.0281019	-0.0394641	0.108303	0.0881404
NUP210	NUP210	grey	grey	0.0320188	-0.0229079	0.0383012	-0.0442027	-0.0348435	0.0925839	0.000388433	0.105068
HDAC11	HDAC11	grey	grey	0.0999381	0.15713	0.0862877	0.113438	0.107073	-0.0368534	0.122631	-0.0376967
XPC	XPC	grey	grey	0.0102319	-0.0683109	-0.00219352	-0.0479578	-0.0495897	0.10745	-0.0324974	0.11456
SLC6A6	SLC6A6	turquoise	turquoise	0.214054	0.274253	0.119479	0.0772084	0.0963316	0.0157063	0.168994	-0.0229265
CCDC174	CCDC174	grey	grey	0.133877	0.175248	0.0921433	0.0476157	0.0583048	0.0162968	0.0974129	0.0102115
NR2C2	NR2C2	turquoise	turquoise	0.185732	0.112306	0.0759108	-0.0117558	-0.0192462	0.136112	0.0279307	0.0921627
MRPS25	MRPS25	green	green	0.0283214	0.0509395	0.0127549	0.0791324	0.106976	0.0406712	0.128786	0.0388332
RBSN	RBSN	grey	grey	0.0263767	-0.000592492	0.0131777	0.0196631	0.00570839	0.0508525	0.0228299	0.044424
CAPN7	CAPN7	grey	grey	0.0547933	-0.0536444	0.0315951	-0.0556057	-0.0576192	0.170206	-0.0115473	0.166579
SH3BP5	SH3BP5	grey	grey	0.088111	0.0567709	0.105746	0.0330541	0.00890779	0.0454005	0.0546456	0.0507378
METTL6	METTL6	grey	grey	0.051463	-0.00405082	0.039006	0.00670761	-0.00596753	0.0582971	-0.000709701	0.0574956
HACL1	HACL1	grey	grey	0.000554822	-0.104575	0.00211079	-0.0446288	-0.0604811	0.0892139	-0.0554133	0.0861848
ANKRD28	ANKRD28	blue	blue	0.146484	0.103359	0.256621	-0.0140686	-0.0612157	0.0259625	0.0278641	0.114561
OXNAD1	OXNAD1	grey	grey	-0.00205658	-0.0990426	-0.00541319	-0.0421176	-0.042053	0.0973474	-0.0328986	0.0951085
RFTN1	RFTN1	grey	grey	0.0415278	-0.0658285	-0.0134123	-0.0618909	-0.0737782	0.125311	-0.0392546	0.0841705
PLCL2	PLCL2	turquoise	turquoise	0.522136	0.52258	0.0804066	0.0425012	0.0955955	0.0623038	0.168784	-0.187691
TBC1D5	TBC1D5	turquoise	turquoise	0.219364	-0.0976046	-0.0680467	-0.206153	-0.201306	0.398527	-0.143281	0.252032
KCNH8	KCNH8	grey	grey	0.00189845	-0.174247	0.00911225	-0.108545	-0.10976	0.123929	-0.0548831	0.138016
RAB5A	RAB5A	grey	grey	0.0860377	0.0450604	0.0310663	0.0256568	0.0352456	0.0953899	0.0584465	0.0654144
KAT2B	KAT2B	turquoise	turquoise	0.0910526	-0.0842871	-0.0242663	-0.0977377	-0.0996127	0.179737	-0.0536767	0.119545
UBE2E2	UBE2E2	red	red	-0.0445743	-0.225756	0.162252	-0.180335	-0.230967	0.323143	-0.160629	0.535362
UBE2E1	UBE2E1	turquoise	turquoise	-0.0576039	-0.213745	-0.110407	-0.0938691	-0.0513039	0.308108	-0.0653161	0.285351
NKIRAS1	NKIRAS1	grey	grey	0.0583449	0.179482	0.038664	0.160301	0.193161	-0.0536911	0.18727	-0.0658704
NR1D2	NR1D2	grey	grey	0.080059	0.00261052	0.0431079	0.0190271	-0.0138009	0.0811949	-0.00885916	0.069831
THRB	THRB	blue	blue	0.138294	0.153875	0.407841	0.0666244	-0.0573288	-0.0655993	0.0259115	0.10517
TOP2B	TOP2B	grey	grey	0.0554985	-0.00887789	0.0541057	-0.00594123	-0.026006	0.0844629	0.0138579	0.085485
NGLY1	NGLY1	turquoise	turquoise	0.0387472	-0.0662324	-0.0291832	-0.0643263	-0.0462037	0.164787	-0.00651528	0.127921
LRRC3B	LRRC3B	blue	blue	0.110585	0.14521	0.230794	0.0333304	0.00481092	-0.0224452	0.0569972	0.0711945
NEK10	NEK10	blue	blue	-0.0436502	-0.154675	0.0474461	-0.057647	-0.103325	0.0839006	-0.109077	0.141327
SLC4A7	SLC4A7	turquoise	turquoise	-0.0772058	-0.36352	-0.12598	-0.190432	-0.20864	0.393492	-0.19665	0.384597
CMC1	CMC1	turquoise	turquoise	0.0259397	-0.084551	-0.0269696	-0.0553454	-0.0608621	0.135699	-0.0487054	0.115517
AZI2	AZI2	grey	grey	0.065915	0.0570202	0.0347546	0.0620734	0.0379254	0.0135642	0.0557723	-0.00665438
RBMS3	RBMS3	blue	blue	0.126561	0.167451	0.203723	0.0310377	0.0127263	0.000377058	0.078242	0.0612907
TGFBR2	TGFBR2	turquoise	turquoise	0.134029	-0.109212	-0.225648	-0.169472	-0.101589	0.380052	-0.0804439	0.179046
STT3B	STT3B	grey	grey	0.0387117	-0.0261641	0.0366574	-0.00921329	-0.0337215	0.113542	0.00391192	0.121327
OSBPL10	OSBPL10	blue	blue	0.115723	0.196285	0.319732	0.0353542	-0.022173	-0.0653697	0.0565729	0.0651091
GPD1L	GPD1L	grey	grey	0.0464176	-0.000587985	0.0194033	0.0364864	0.0077476	0.0607031	0.0154522	0.0598743
CMTM7	CMTM7	turquoise	turquoise	0.0867051	-0.127332	-0.162206	-0.122713	-0.0775145	0.331309	-0.0572698	0.18494
CMTM6	CMTM6	turquoise	turquoise	-0.0244005	-0.170314	-0.116023	-0.0992563	-0.0762193	0.233368	-0.0421631	0.172276
DYNC1LI1	DYNC1LI1	grey	grey	0.0947083	0.0609328	0.0487005	0.0311519	0.0265137	0.0733293	0.0396925	0.0626522
CNOT10	CNOT10	turquoise	turquoise	0.122292	0.112601	0.0904039	-0.00552108	0.00161381	0.090695	0.0576471	0.0868735
GLB1	GLB1	turquoise	turquoise	0.0230354	-0.091529	-0.0138098	-0.0639011	-0.0780861	0.162204	-0.06128	0.153302
FBXL2	FBXL2	blue	blue	0.178033	0.225956	0.279228	0.0485196	1.97732287830046e-05	-0.0339173	0.0755274	0.0481699
UBP1	UBP1	grey	grey	0.0954784	0.0480499	0.108322	-0.00815284	-0.0386826	0.060043	0.00105087	0.0786948
CLASP2	CLASP2	yellow	yellow	0.23485	0.0185726	0.136692	-0.0872066	-0.152498	0.158195	-0.0579344	0.132161
PDCD6IP	PDCD6IP	grey	grey	0.0165808	-0.116319	-0.0280928	-0.0540622	-0.0743148	0.167456	-0.0544088	0.149839
ARPP21	ARPP21	blue	blue	0.185898	0.404672	0.47689	0.211076	0.145625	-0.207832	0.207723	-0.0197819
TRANK1	TRANK1	red	red	0.0777799	0.0875699	0.21246	0.00313384	-0.0346241	0.0580421	0.00738918	0.182224
EPM2AIP1	EPM2AIP1	grey	grey	0.00536668	-0.051791	0.00773412	0.0510612	0.0162685	0.046912	0.00873082	0.0465411
MLH1	MLH1	turquoise	turquoise	0.0366727	-0.0580212	0.00593935	-0.0533287	-0.0596895	0.129578	-0.0319048	0.110169
LRRFIP2	LRRFIP2	grey	grey	0.0878432	-0.0264497	0.0721414	-0.0635677	-0.080095	0.120275	-0.0234249	0.113795
GOLGA4	GOLGA4	turquoise	turquoise	-0.0519724	-0.284639	-0.0295345	-0.168329	-0.177326	0.296369	-0.12817	0.301141
ITGA9	ITGA9	turquoise	turquoise	0.211908	-0.0489821	-0.115492	-0.107926	-0.0982659	0.304686	-0.083054	0.119937
CTDSPL	CTDSPL	blue	blue	0.116697	0.120838	0.263752	-0.00013218	-0.039705	0.0121182	0.0304271	0.111609
ACAA1	ACAA1	grey	grey	0.0417747	0.039818	0.0242556	0.0373254	0.0359477	0.0444828	0.0442445	0.0431287
OXSR1	OXSR1	red	red	-0.0669274	-0.195004	-0.0519061	-0.0857989	-0.0891321	0.175578	-0.0952084	0.177968
ACVR2B	ACVR2B	grey	grey	0.0962967	0.0474043	0.0334368	-0.00548104	-0.0174532	0.0412272	0.00107184	0.016701
EXOG	EXOG	grey	grey	0.00632281	-0.0712849	-0.00808982	-0.00997875	-0.0191061	0.0812595	-0.0104321	0.0711555
WDR48	WDR48	grey	grey	0.0387481	-0.0107596	0.0304954	0.00467636	-0.0172401	0.0502136	0.00636794	0.0506445
CX3CR1	CX3CR1	turquoise	turquoise	0.257901	0.0654897	-0.177921	-0.069827	-0.029793	0.243289	-0.0595411	0.0211327
MOBP	MOBP	grey	grey	0.00441618	-0.038442	-0.00930198	-0.025138	-0.00480046	0.0246472	0.0319905	0.0305952
MYRIP	MYRIP	blue	blue	0.0690939	0.0660682	0.269411	0.0165469	-0.0506492	-0.0258099	0.0042747	0.0938731
EIF1B	EIF1B	brown	brown	0.0403988	0.153217	0.0400831	0.24721	0.231102	-0.0908884	0.198397	-0.090253
CTNNB1	CTNNB1	grey	grey	-0.0343947	-0.136274	-0.0551713	-0.00562784	-0.00383049	0.181296	0.0160298	0.159915
ULK4	ULK4	red	red	0.0504326	-0.0370327	0.143942	-0.0739448	-0.103777	0.156203	-0.0397685	0.245259
TRAK1	TRAK1	turquoise	turquoise	0.0130211	-0.157362	-0.0230346	-0.0949742	-0.0992997	0.279689	-0.0795584	0.280078
CCK	CCK	brown	brown	0.0178085	0.210282	0.0239072	0.447744	0.393905	-0.228376	0.291284	-0.230822
LYZL4	LYZL4	grey	grey	0.249369	0.270919	0.0969836	0.0194693	0.0376774	0.0177029	0.0787811	-0.0645794
VIPR1	VIPR1	grey	grey	0.0467129	0.033834	0.0754386	0.0185317	-0.018429	0.0130245	0.00347939	0.0419948
SS18L2	SS18L2	grey	grey	0.0213494	0.113309	0.0280514	0.131398	0.155687	-0.0520695	0.145195	-0.0556484
NKTR	NKTR	grey	grey	0.119883	-0.00449068	0.100415	-0.0824312	-0.098594	0.172091	-0.0225639	0.17475
ZBTB47	ZBTB47	blue	blue	0.00639425	0.0359208	0.064459	0.0558645	0.0232784	-0.0422339	0.0244399	-0.00124902
SNRK	SNRK	turquoise	turquoise	0.123513	0.057492	-0.0153599	0.00311923	0.0300537	0.133624	0.0748677	0.0484556
ANO10	ANO10	turquoise	turquoise	0.0205297	-0.116699	0.000343815	-0.070495	-0.0743291	0.189042	-0.0592192	0.186976
TCAIM	TCAIM	grey	grey	0.0245346	-0.0781529	0.000465713	-0.0445935	-0.0554667	0.13547	-0.037775	0.138375
ZNF445	ZNF445	grey	grey	0.206127	0.265419	0.153489	0.0543202	0.0624298	0.0132774	0.125351	0.00174558
ZDHHC3	ZDHHC3	green	green	0.020455	-0.0288618	-0.00435468	0.0266501	0.0233259	0.103955	0.0118369	0.104428
EXOSC7	EXOSC7	grey	grey	0.0991496	0.122758	0.0674259	0.0353538	0.0536298	0.0412439	0.0822739	0.0372933
TMEM158	TMEM158	brown	brown	0.0260491	0.125428	0.0219711	0.162636	0.159938	-0.0875797	0.144854	-0.0897349
LARS2	LARS2	grey	grey	0.120626	0.253834	0.0332072	0.170323	0.211133	-0.0507127	0.204998	-0.113242
LIMD1	LIMD1	turquoise	turquoise	-0.00659551	-0.0975878	-0.0477465	-0.0641402	-0.0467692	0.158261	-0.0268187	0.131859
SACM1L	SACM1L	yellow	yellow	0.119398	0.082452	0.0944557	0.00892506	-0.0102299	0.0736085	0.0377319	0.0835871
LZTFL1	LZTFL1	grey	grey	0.16954	0.258779	0.182625	0.0931427	0.0740971	-0.0501863	0.127605	-0.0233748
FYCO1	FYCO1	turquoise	turquoise	0.218467	0.201555	0.029929	0.00433025	0.0404053	0.071664	0.0959375	-0.0277134
CCR5	CCR5	turquoise	turquoise	0.351323	0.27421	-0.088937	0.00541863	0.068004	0.0887166	0.0861814	-0.177041
CCDC12	CCDC12	turquoise	turquoise	0.122805	0.118204	0.0296011	0.0409683	0.07045	0.0614653	0.102631	0.0147466
SETD2	SETD2	turquoise	turquoise	0.0404396	-0.155913	-0.0369644	-0.139683	-0.138657	0.270506	-0.104527	0.242939
KLHL18	KLHL18	turquoise	turquoise	0.0497482	-0.0662264	-0.0349083	-0.0496827	-0.0509207	0.173642	-0.0517195	0.149806
PTPN23	PTPN23	grey	grey	0.0425339	0.0125909	0.0567248	0.0130261	-0.00526568	0.0395163	0.0112712	0.0490338
SCAP	SCAP	grey	grey	0.0610247	0.0277325	0.0511307	0.0404304	0.0133325	0.0403247	0.0124152	0.04911
CSPG5	CSPG5	brown	brown	0.108218	0.291682	0.14169	0.25298	0.239719	-0.149912	0.241356	-0.125198
SMARCC1	SMARCC1	grey	grey	0.0664839	-0.0389914	0.0521137	-0.0712776	-0.0765482	0.164549	-0.0258888	0.168849
DHX30	DHX30	grey	grey	0.200847	0.229446	0.170177	0.0483559	0.0394162	0.0428966	0.0945712	0.0471604
MAP4	MAP4	yellow	yellow	0.219786	0.115463	0.0250809	0.0402405	0.0353873	0.126298	0.0781266	0.0279349
TMA7	TMA7	brown	brown	0.021585	0.145467	0.0236507	0.236549	0.243398	-0.0883517	0.211131	-0.0924596
SHISA5	SHISA5	grey	grey	-0.00234309	-0.0117818	-6.49757e-06	0.0608364	0.0382826	-0.00134492	0.0293922	-0.0105995
PFKFB4	PFKFB4	yellow	yellow	0.152695	0.133356	0.0345351	-0.00566218	0.00879666	0.0473361	0.0489338	-0.0104345
UQCRC1	UQCRC1	grey	grey	0.0687383	0.151832	0.0593134	0.161125	0.160738	-0.0350588	0.14936	-0.0386831
IP6K2	IP6K2	grey	grey	0.0626195	0.0229994	0.0644568	0.00259079	-0.0126735	0.0722765	0.0141963	0.0845143
PRKAR2A	PRKAR2A	grey	grey	0.00254304	-0.0979004	-0.00146549	-0.0471801	-0.0481062	0.14895	-0.0186832	0.157394
ARIH2	ARIH2	turquoise	turquoise	0.0976938	-0.0148387	-0.00366793	-0.0683783	-0.0578236	0.176381	-0.0128361	0.124082
P4HTM	P4HTM	grey	grey	0.0518496	0.0858084	0.0946026	0.0970084	0.0681007	-0.0170914	0.0835291	0.025155
WDR6	WDR6	grey	grey	-0.0142006	-0.0731457	0.0247637	0.00943556	-0.0389904	0.0216097	-0.0289303	0.0533784
DALRD3	DALRD3	yellow	yellow	0.238122	0.324619	0.147211	0.0534261	0.0865546	-0.00880631	0.139775	-0.0379948
NDUFAF3	NDUFAF3	black	black	-0.00133269	0.0736473	-0.00580089	0.128373	0.161824	-0.0330402	0.125642	-0.0370696
QRICH1	QRICH1	grey	grey	0.189933	0.155273	0.10789	-0.000133501	-0.00177266	0.0827559	0.0563693	0.0492722
USP19	USP19	grey	grey	0.126302	0.19816	0.10204	0.0743504	0.0746927	-0.0233947	0.112985	-0.0198169
USP4	USP4	turquoise	turquoise	0.00571986	-0.124589	-0.0284751	-0.0911481	-0.0752937	0.22044	-0.0399994	0.206706
GPX1	GPX1	grey	grey	-0.0676267	-0.11507	-0.0826254	0.0129046	0.021744	0.0879359	0.00420182	0.0739136
RHOA	RHOA	grey	grey	0.0726803	0.0330614	-0.0452172	0.0240577	0.0584374	0.10648	0.0740505	0.0352831
DAG1	DAG1	blue	blue	0.103684	0.174498	0.154144	0.0736176	0.0581511	-0.0354669	0.0987035	0.00209069
BSN	BSN	blue	blue	0.124106	0.270305	0.281734	0.264899	0.177159	-0.140693	0.2043	-0.0362898
RNF123	RNF123	grey	grey	0.105998	0.10497	0.0659462	0.021957	0.00556658	0.0501305	0.0321565	0.0409901
IP6K1	IP6K1	yellow	yellow	0.172091	0.131241	0.110334	0.0413943	0.00356053	0.0606422	0.0636212	0.0497879
CAMKV	CAMKV	brown	brown	0.0612197	0.132919	0.171732	0.198942	0.0916197	-0.123849	0.0914892	-0.0512832
RBM6	RBM6	turquoise	turquoise	0.14816	-0.0381922	0.0670149	-0.130741	-0.142375	0.24909	-0.0670712	0.218947
RBM5	RBM5	yellow	yellow	0.248747	0.148697	0.112801	-0.0230168	-0.0347344	0.132916	0.0382365	0.0764116
GNAI2	GNAI2	grey	grey	0.0341199	-0.0349042	-0.0615717	0.0356202	0.0481462	0.105673	0.0366859	0.0627432
TUSC2	TUSC2	brown	brown	0.00235021	0.0270985	0.0146037	0.119658	0.0806054	-0.0437188	0.0641042	-0.0352412
RASSF1	RASSF1	turquoise	turquoise	0.036259	-0.0204484	-0.0370063	-0.040178	-0.0182665	0.105071	-0.00496322	0.0600141
DOCK3	DOCK3	blue	blue	0.145685	0.14463	0.457838	0.024869	-0.0959192	-0.0667453	0.0152648	0.136681
MANF	MANF	green	green	0.154769	0.27723	0.110767	0.135982	0.175269	-0.0409419	0.251046	-0.0532773
DCAF1	DCAF1	grey	grey	0.0876323	0.0641375	0.076258	-0.0289529	-0.0128106	0.0861705	0.0243203	0.0875636
RAD54L2	RAD54L2	turquoise	turquoise	0.0931398	0.0371534	0.0624015	-0.0457355	-0.048604	0.0928091	-0.0135451	0.0903902
TEX264	TEX264	grey	grey	0.0561081	0.144821	0.0470741	0.138309	0.148655	-0.028586	0.154188	-0.025952
PCBP4	PCBP4	grey	grey	0.0581201	0.135271	0.0756512	0.115964	0.107816	-0.0643671	0.12414	-0.044447
RPL29	RPL29	grey	grey	-0.0967109	-0.193317	-0.0570495	-0.00481832	-0.0394385	0.0628394	-0.0642965	0.0726275
DUSP7	DUSP7	yellow	yellow	0.106498	0.12721	0.0237331	0.078336	0.074836	-0.0128525	0.0807608	-0.0572411
ALAS1	ALAS1	green	green	0.0550785	0.0970437	0.0256479	0.0626638	0.0856988	0.00219401	0.12256	-0.0110697
TWF2	TWF2	yellow	yellow	0.193469	0.26394	0.0428156	0.0894017	0.129228	-0.0136814	0.158393	-0.0979452
WDR82	WDR82	yellow	yellow	0.0169791	-0.0865865	0.0426278	0.00895989	-0.0833302	0.0303381	-0.0694644	0.0501982
BAP1	BAP1	grey	grey	0.00816041	-0.00952321	0.0482993	0.0878609	0.0161395	-0.0344717	0.00678999	-0.0146981
NISCH	NISCH	yellow	yellow	0.242564	0.279837	0.112139	0.152605	0.14197	-0.0252131	0.168723	-0.0855756
STAB1	STAB1	yellow	yellow	0.0732574	-0.057092	-0.115902	-0.11567	-0.122867	0.0939323	-0.108744	-0.0287289
SMIM4	SMIM4	grey	grey	0.15664	0.188523	0.0846208	0.0502665	0.0718774	0.038514	0.110557	0.0133301
PBRM1	PBRM1	turquoise	turquoise	0.0983809	-0.0418419	0.0079447	-0.0751506	-0.0717053	0.232401	-0.0232928	0.202609
GNL3	GNL3	grey	grey	0.111028	0.126584	0.074696	0.0371238	0.0496951	0.0492128	0.0781695	0.0361238
GLT8D1	GLT8D1	grey	grey	0.195501	0.256909	0.150905	0.0458601	0.0510762	0.00330929	0.111771	-0.00164811
SPCS1	SPCS1	black	black	0.00431242	0.0837916	-0.0099577	0.185334	0.216098	-0.0513561	0.163256	-0.063267
NEK4	NEK4	grey	grey	0.0360319	-0.0262981	0.035725	-0.00580682	-0.0314309	0.0659683	-0.0149909	0.086223
SFMBT1	SFMBT1	turquoise	turquoise	0.27027	0.229749	0.046208	0.000537704	0.0237347	0.0999118	0.0757796	-0.015412
PRKCD	PRKCD	turquoise	turquoise	0.179751	0.031435	-0.11957	-0.0546371	-0.0284413	0.192106	-0.0230043	0.0268654
TKT	TKT	grey	grey	0.0282942	0.0732128	0.00747916	0.128793	0.131343	-0.00488281	0.110885	-0.00786932
DCP1A	DCP1A	turquoise	turquoise	0.074177	-0.0395098	0.0170498	-0.0650751	-0.0632515	0.170008	-0.0219112	0.144154
CACNA1D	CACNA1D	turquoise	turquoise	0.311298	0.285916	0.243927	-0.0302608	-0.0276855	0.133766	0.0561653	0.150106
ACTR8	ACTR8	grey	grey	0.091597	0.121824	0.0345464	0.0479428	0.0582829	0.00762305	0.0738239	-0.02187
SELENOK	SELENOK	black	black	0.0604492	0.258466	0.0163475	0.263471	0.364749	-0.10739	0.314882	-0.130995
CACNA2D3	CACNA2D3	blue	blue	0.117306	0.165014	0.413347	0.0263095	-0.0370763	-0.0940754	0.0440639	0.0819293
ERC2	ERC2	blue	blue	0.151904	0.278279	0.482247	0.0817464	0.00337628	-0.101967	0.101361	0.112541
CCDC66	CCDC66	grey	grey	0.0687068	-0.0165715	0.0594489	-0.0292519	-0.0411551	0.106689	-0.0156351	0.11662
TASOR	TASOR	turquoise	turquoise	0.179962	0.0937644	0.0564243	-0.0158151	-0.0275161	0.125438	0.0194954	0.0674382
ARHGEF3	ARHGEF3	grey	grey	0.0447616	-0.00757837	0.11334	-0.000606067	-0.0412017	0.0292631	0.0018051	0.0572757
APPL1	APPL1	grey	grey	0.103475	0.120342	0.117063	0.0662868	0.0512887	0.0473462	0.0885062	0.0729667
ARF4	ARF4	grey	grey	0.103308	0.106579	0.0099769	0.0612154	0.0714055	0.0456573	0.103131	-0.00610995
DENND6A	DENND6A	turquoise	turquoise	0.181648	0.0826625	0.0318217	-0.0578721	-0.033245	0.167843	0.0171608	0.0913006
SLMAP	SLMAP	turquoise	turquoise	0.147226	0.0133521	0.0259255	-0.0627181	-0.0562023	0.187533	-0.00812654	0.117141
FLNB	FLNB	grey	grey	0.162423	0.235331	0.20021	0.03494	0.0314345	-0.0302187	0.0996463	0.0117373
ABHD6	ABHD6	grey	grey	0.149251	0.169421	0.097936	0.048402	0.0637157	0.0237501	0.107723	0.00700956
PXK	PXK	turquoise	turquoise	0.123274	0.0113505	0.0460129	-0.0628311	-0.0557271	0.120807	0.00295383	0.0883482
PDHB	PDHB	grey	grey	0.0819206	0.162929	0.0567648	0.123149	0.13278	-0.0360032	0.138799	-0.043836
FAM107A	FAM107A	grey	grey	-0.031352	-0.0838903	0.00395877	0.0613931	0.0144706	0.0242095	0.00612153	0.0458993
FHIT	FHIT	turquoise	turquoise	0.0475952	-0.308137	-0.137644	-0.255315	-0.250287	0.418125	-0.221851	0.335436
PTPRG	PTPRG	blue	blue	0.136986	0.180542	0.376191	0.0281558	-0.0336039	-0.0717035	0.0768804	0.0815381
C3orf14	C3orf14	grey	grey	0.131066	0.149945	0.0784723	0.0716526	0.0638528	0.00876011	0.0767946	-0.00634452
CADPS	CADPS	blue	blue	0.202648	0.329717	0.499655	0.116665	0.0300475	-0.134956	0.123885	0.0632597
SYNPR	SYNPR	blue	blue	0.105927	0.129134	0.220724	0.0656233	0.000292928	-0.0714736	0.0445792	-0.00871679
THOC7	THOC7	grey	grey	0.090481	0.1978	0.0858492	0.156647	0.171116	-0.0429413	0.174171	-0.0316978
ATXN7	ATXN7	turquoise	turquoise	0.329742	0.356699	0.0960338	0.0386872	0.0773204	0.0259202	0.144598	-0.092248
PSMD6	PSMD6	black	black	0.0308572	0.156767	0.0128378	0.168824	0.225545	-0.0657512	0.192374	-0.077138
PRICKLE2	PRICKLE2	blue	blue	0.250754	0.370789	0.437833	0.10121	0.041539	-0.0750145	0.144921	0.0771768
MAGI1	MAGI1	yellow	yellow	0.378531	0.26723	0.236589	-0.017067	-0.0510725	0.0790841	0.0444958	0.0418253
LRIG1	LRIG1	red	red	-0.0270092	-0.170566	-0.00182284	-0.0836402	-0.103068	0.150389	-0.079883	0.204719
SUCLG2	SUCLG2	turquoise	turquoise	-0.00477935	-0.223208	-0.149988	-0.153662	-0.131529	0.325975	-0.129361	0.253223
TAFA1	TAFA1	blue	blue	0.120761	0.20631	0.37946	0.0880711	0.00214888	-0.153718	0.0508095	-0.00226362
TMF1	TMF1	grey	grey	0.0608125	-0.0158686	-0.00226546	0.00477292	0.00254987	0.109222	0.0302502	0.0728512
UBA3	UBA3	grey	grey	0.00848011	-0.0802852	-0.0100573	-0.0313824	-0.0454808	0.117407	-0.0351526	0.117381
ARL6IP5	ARL6IP5	brown	brown	0.0154313	0.00476668	-0.00264084	0.141826	0.109445	0.0235773	0.0654501	0.0272005
FRMD4B	FRMD4B	turquoise	turquoise	0.331722	0.0457511	-0.181619	-0.148218	-0.0765938	0.367389	-0.0115659	0.0769443
MITF	MITF	turquoise	turquoise	0.313005	0.131219	-0.0676414	-0.0933754	-0.0403573	0.25229	0.0281476	0.0340533
FOXP1	FOXP1	yellow	yellow	0.407686	0.51162	0.248046	0.162775	0.158103	-0.0638505	0.245544	-0.114095
RYBP	RYBP	yellow	yellow	0.147898	0.12314	0.061748	0.045985	0.034658	0.0212671	0.0648841	-0.013513
PPP4R2	PPP4R2	grey	grey	0.0807266	0.00862909	0.0143479	0.0143908	0.0196208	0.134964	0.0458395	0.109166
PDZRN3	PDZRN3	blue	blue	0.118774	0.141817	0.341271	0.0494864	-0.0281087	-0.0599591	0.0367964	0.0890702
CNTN3	CNTN3	blue	blue	0.157802	0.249289	0.427127	0.0586141	-0.0183223	-0.0864357	0.0746411	0.095536
ZNF717	ZNF717	grey	grey	-0.0257124	-0.158831	-0.0159161	-0.0609233	-0.0831149	0.129774	-0.0807634	0.155232
ROBO2	ROBO2	blue	blue	-0.00184283	-0.100164	0.383661	-0.0331096	-0.235773	-0.145009	-0.183462	0.0688296
ROBO1	ROBO1	blue	blue	0.163838	0.20916	0.450025	0.0514669	-0.0510647	-0.106885	0.047674	0.0738778
GBE1	GBE1	turquoise	turquoise	-0.000899528	-0.137392	-0.0832305	-0.0969322	-0.07562	0.208526	-0.0450484	0.167276
CADM2	CADM2	blue	blue	0.143701	0.154681	0.531306	0.0583804	-0.12386	-0.175553	-0.0324169	0.0641401
CHMP2B	CHMP2B	grey	grey	0.0209098	0.0346724	0.0229675	0.0741032	0.0632777	-0.00446266	0.0622673	0.000196998
HTR1F	HTR1F	blue	blue	0.243395	0.410478	0.379901	0.0650903	0.055406	-0.065039	0.163029	0.0586621
CGGBP1	CGGBP1	grey	grey	0.0249267	-0.0246026	-0.0159969	0.0438935	0.0352895	0.0683337	0.0462488	0.0454942
ZNF654	ZNF654	turquoise	turquoise	0.0800592	-0.00765107	0.050843	-0.0624704	-0.0599282	0.148319	-0.0140207	0.142026
C3orf38	C3orf38	grey	grey	0.0595392	0.0241321	0.0394836	0.0321507	0.0148674	0.0398923	0.0316814	0.0416989
EPHA3	EPHA3	blue	blue	0.0887184	0.115924	0.230044	0.0265151	-0.0281068	-0.0405055	0.0285874	0.0440718
PROS1	PROS1	turquoise	turquoise	0.234033	0.123043	-0.0792956	-0.0356794	0.0123236	0.158652	0.0418131	-0.0356633
ARL13B	ARL13B	grey	grey	0.0439404	-0.0319769	0.0504699	-0.034338	-0.0474135	0.0863394	-0.0199977	0.10147
NSUN3	NSUN3	turquoise	turquoise	0.0085864	-0.0988777	-0.023136	-0.0537931	-0.0561812	0.145661	-0.0476536	0.128551
EPHA6	EPHA6	blue	blue	0.147356	0.184253	0.45766	0.0570349	-0.0654236	-0.136468	0.0111603	0.0493572
ARL6	ARL6	grey	grey	0.0222358	0.00339547	0.0744826	0.0452204	0.000231603	-0.0236839	0.00208751	0.00793389
CRYBG3	CRYBG3	turquoise	turquoise	0.0465042	-0.0586623	-0.0456003	-0.0680808	-0.0549961	0.134375	-0.0315761	0.0971491
CLDND1	CLDND1	grey	grey	-0.025441	-0.11662	-0.0171704	-0.0123632	-0.0354266	0.0490776	-0.00898526	0.0557084
ST3GAL6	ST3GAL6	turquoise	turquoise	0.276585	0.10124	-0.126422	-0.0742903	-0.0176325	0.238346	0.0120667	0.019538
DCBLD2	DCBLD2	grey	grey	0.0605638	0.00862441	0.0759785	0.00267807	-0.0262736	0.0490267	0.00218788	0.0660914
CMSS1	CMSS1	green	green	0.127259	0.276849	0.00361097	0.193053	0.269119	-0.0459644	0.295371	-0.129626
FILIP1L	FILIP1L	turquoise	turquoise	0.153263	0.132819	0.0442163	0.0211535	0.0493116	0.106135	0.102909	0.0505016
TBC1D23	TBC1D23	turquoise	turquoise	0.213305	0.14748	0.0697532	-0.0182357	-0.0133101	0.101974	0.0461969	0.0293628
TOMM70	TOMM70	grey	grey	0.0675669	0.116406	0.0620193	0.110149	0.0970259	-0.0146979	0.0920764	-0.0107695
TFG	TFG	grey	grey	0.0325706	-0.0447948	0.0144747	-0.00175526	-0.0169327	0.103633	0.00726252	0.0951751
SENP7	SENP7	turquoise	turquoise	0.135963	0.0256305	0.0695678	-0.0515014	-0.0626577	0.171729	-0.00242004	0.157487
PCNP	PCNP	grey	grey	0.0443026	0.0230595	0.0258086	0.0653982	0.0535504	0.0404443	0.0567204	0.0280078
ZBTB11	ZBTB11	grey	grey	0.11874	0.0973155	0.101719	0.0342988	0.0104697	0.0562438	0.0567486	0.0604331
CEP97	CEP97	yellow	yellow	0.0616692	-0.012115	0.0606597	-0.00415843	-0.0470278	0.0257477	-0.0226802	0.033542
NXPE3	NXPE3	grey	grey	0.028985	-0.0308928	0.0501335	-0.0115322	-0.0320617	0.0594356	-0.0150442	0.0866122
NFKBIZ	NFKBIZ	turquoise	turquoise	-0.00439481	-0.114933	-0.0588815	-0.0637521	-0.0522123	0.160909	-0.0284561	0.102693
ALCAM	ALCAM	red	red	0.0568332	0.0320744	0.141267	0.0017165	-0.0151483	0.0833131	0.0343447	0.166782
CBLB	CBLB	turquoise	turquoise	0.0800851	-0.0291929	0.0380449	-0.0822824	-0.082739	0.156956	-0.00704193	0.118263
BBX	BBX	turquoise	turquoise	0.028764	-0.131493	-0.0150119	-0.112812	-0.115065	0.237605	-0.0784228	0.227038
CD47	CD47	brown	brown	0.10425	0.135309	0.108672	0.158365	0.11324	-0.0365958	0.135558	-0.0463257
IFT57	IFT57	grey	grey	0.0745181	0.139597	0.111324	0.102118	0.0918852	-0.0433914	0.106224	-0.0162099
DZIP3	DZIP3	blue	blue	0.120143	0.146586	0.19086	0.0766855	0.0368623	-0.0186303	0.0773172	0.0378286
NECTIN3	NECTIN3	blue	blue	0.012258	-0.0597401	0.140149	-0.000686625	-0.0800939	0.00227145	-0.057715	0.0763162
TAGLN3	TAGLN3	brown	brown	-0.0178896	0.0456196	0.0360502	0.265193	0.190342	-0.0950286	0.139802	-0.0614422
CD200	CD200	brown	brown	0.0288105	0.061328	0.0724384	0.147902	0.0885105	-0.0921357	0.0781806	-0.0680468
ATG3	ATG3	grey	grey	0.125175	0.173803	0.0511494	0.0738418	0.091991	0.0247362	0.13286	-0.0142267
SIDT1	SIDT1	blue	blue	0.126767	0.212768	0.332025	0.0572284	0.00181835	-0.05948	0.0842693	0.0713893
USF3	USF3	grey	grey	0.110938	0.0934064	0.0701965	0.0163566	0.00818292	0.0559957	0.0406795	0.0479214
NAA50	NAA50	green	green	0.00955368	-0.0342296	-0.00733573	0.0232441	0.0302453	0.0812776	0.0416341	0.0666033
ATP6V1A	ATP6V1A	brown	brown	0.0623293	0.0830284	0.0624792	0.187517	0.127193	-0.022074	0.111288	-0.018478
ZDHHC23	ZDHHC23	blue	blue	0.0596842	0.131239	0.138689	0.097709	0.0674993	-0.0559866	0.077461	-0.0026011
CCDC191	CCDC191	grey	grey	0.16389	0.150175	0.0825052	-0.00961065	0.000127245	0.03088	0.0487358	-0.00486077
QTRT2	QTRT2	grey	grey	0.0791715	0.0299015	0.0451895	-0.0154918	-0.0216466	0.0859359	0.0161381	0.0823961
ZBTB20	ZBTB20	turquoise	turquoise	0.205507	-0.0810391	-0.121937	-0.169772	-0.119041	0.377561	-0.0545912	0.219312
GAP43	GAP43	brown	brown	-0.0109212	0.0203385	0.1009	0.285807	0.176207	-0.0833731	0.114243	-0.00736024
LSAMP	LSAMP	blue	blue	0.226162	0.395739	0.53837	0.183935	0.0789475	-0.272644	0.165513	-0.0774876
IGSF11	IGSF11	blue	blue	0.0727262	-0.0378982	0.121153	-0.0503159	-0.0815416	0.0468559	-0.0294568	0.0838706
B4GALT4	B4GALT4	turquoise	turquoise	0.0894298	0.0346378	-0.0407605	-0.0258699	0.00434397	0.115067	0.0248244	0.0366313
ARHGAP31	ARHGAP31	turquoise	turquoise	0.132932	-0.0083336	-0.10094	-0.0762197	-0.020969	0.26818	0.00241682	0.167154
TMEM39A	TMEM39A	turquoise	turquoise	0.038121	-0.0470292	-0.00652547	-0.0604472	-0.0521475	0.138283	-0.00634463	0.10806
POGLUT1	POGLUT1	grey	grey	0.0529819	0.051611	0.0493128	0.00779187	0.0143146	0.0418607	0.0398208	0.0449195
TIMMDC1	TIMMDC1	grey	grey	0.138818	0.144449	0.0860997	0.0230271	0.0290991	0.0564982	0.0697493	0.0416811
ADPRH	ADPRH	green	green	0.0252216	0.140924	-0.00976021	0.131618	0.1799	-0.0532343	0.197308	-0.0773874
COX17	COX17	green	green	0.0403852	0.184686	-0.00357252	0.203059	0.266297	-0.0678681	0.270949	-0.0934579
GSK3B	GSK3B	grey	grey	0.104041	-0.00167575	0.0654413	-0.00341169	-0.0285948	0.167268	0.0145489	0.159771
LRRC58	LRRC58	grey	grey	0.130129	0.161	0.0768286	0.0953022	0.0955021	0.0144447	0.129225	0.00333317
NDUFB4	NDUFB4	black	black	0.0436293	0.230443	-0.00914536	0.264156	0.369515	-0.104532	0.304931	-0.139085
STXBP5L	STXBP5L	blue	blue	0.117289	0.118399	0.468284	0.028527	-0.111301	-0.12756	-0.028874	0.0851928
HCLS1	HCLS1	turquoise	turquoise	-0.0600462	-0.255279	-0.162536	-0.136738	-0.100523	0.338265	-0.100578	0.286382
GOLGB1	GOLGB1	grey	grey	0.0900631	0.0484769	0.0786727	0.00561859	0.00427827	0.0975398	0.0439138	0.111194
IQCB1	IQCB1	grey	grey	0.0287524	-0.047823	0.0315123	-0.0421753	-0.0407827	0.155647	-0.00954056	0.175637
EAF2	EAF2	red	red	0.0546914	0.0103098	0.0691241	-0.0476477	-0.0389931	0.132586	0.0176516	0.162557
SLC15A2	SLC15A2	turquoise	turquoise	-0.0324704	-0.205136	-0.0821125	-0.0934751	-0.0893323	0.27212	-0.0867606	0.264551
CD86	CD86	turquoise	turquoise	0.0390976	-0.230348	-0.234073	-0.18421	-0.115532	0.448179	-0.0743565	0.276197
FAM162A	FAM162A	grey	grey	0.04295	0.0451519	0.0260813	0.071625	0.0689844	0.010267	0.0821248	0.00576748
KPNA1	KPNA1	green	green	0.0538739	0.00673252	0.0423739	0.0203104	0.0206012	0.105722	0.0490136	0.104041
PARP9	PARP9	turquoise	turquoise	0.0385271	-0.0770755	-0.0901262	-0.0828003	-0.0634702	0.191791	-0.0519521	0.122431
PARP14	PARP14	turquoise	turquoise	-0.0712139	-0.250339	-0.165256	-0.17101	-0.150002	0.277161	-0.14249	0.23132
HSPBAP1	HSPBAP1	turquoise	turquoise	0.000211812	-0.132905	-0.0654514	-0.0935231	-0.0857927	0.210083	-0.0809327	0.192873
SLC49A4	SLC49A4	turquoise	turquoise	0.0273172	-0.0905737	-0.0352013	-0.0597598	-0.035207	0.21483	-0.0156995	0.180451
SEC22A	SEC22A	turquoise	turquoise	0.0675934	-0.00755966	0.0460754	-0.0492641	-0.0540689	0.140895	-0.0125418	0.152283
ADCY5	ADCY5	blue	blue	0.0682287	0.0619	0.125226	0.0600955	0.0216004	-0.0173391	0.0569506	0.0281531
HACD2	HACD2	grey	grey	0.107141	0.0509682	0.0815594	0.00786756	-0.0188046	0.0697132	0.0169772	0.0709786
CCDC14	CCDC14	grey	grey	-0.0529515	-0.184372	-0.0276743	-0.0812996	-0.102109	0.12057	-0.0941596	0.134289
KALRN	KALRN	blue	blue	0.175806	0.338251	0.509645	0.128587	0.047375	-0.175852	0.135904	0.0334807
ITGB5	ITGB5	turquoise	turquoise	0.29404	0.0558736	-0.186886	-0.0891335	-0.0290853	0.317656	-0.00249055	0.0357909
HEG1	HEG1	red	red	0.0147639	0.00612206	-0.00511287	0.00261556	0.0265315	0.0723672	0.0571421	0.0874323
ZNF148	ZNF148	turquoise	turquoise	0.103764	-0.0568174	0.0249525	-0.0908831	-0.112598	0.218613	-0.0705578	0.197797
SNX4	SNX4	grey	grey	0.0536886	-0.0327412	0.0477279	-0.0216122	-0.0460619	0.0816749	-0.0219277	0.0836118
OSBPL11	OSBPL11	turquoise	turquoise	0.163086	0.000231311	-0.0795703	-0.0750363	-0.0546635	0.224416	-0.0424867	0.0994284
ZXDC	ZXDC	turquoise	turquoise	-0.00497379	-0.145214	-0.0265476	-0.0590661	-0.0626386	0.192377	-0.0585389	0.200095
CHCHD6	CHCHD6	red	red	0.10837	0.196652	0.164939	0.10841	0.111865	-0.0113542	0.148473	0.0386598
PLXNA1	PLXNA1	grey	grey	0.0228499	0.00531699	0.0560557	0.0554239	-0.00619223	-0.0190038	-0.00124106	0.00318173
PODXL2	PODXL2	brown	brown	0.0368754	0.114024	0.0962765	0.147966	0.107155	-0.0888607	0.103617	-0.0478325
ABTB1	ABTB1	grey	grey	-0.00279346	-0.0203585	0.0335357	0.0200827	-0.0186379	-0.0177205	-0.0206494	0.00127909
MGLL	MGLL	grey	grey	0.132486	0.172359	0.0716575	0.135052	0.145196	0.0603961	0.167023	0.0496423
KBTBD12	KBTBD12	grey	grey	-0.100486	-0.278195	-0.0968695	-0.110083	-0.123694	0.238496	-0.169005	0.296179
SEC61A1	SEC61A1	grey	grey	0.0594269	0.0701255	0.0236399	0.0224396	0.0326921	0.0464765	0.0614805	0.031088
RUVBL1	RUVBL1	green	green	0.0259288	0.0540262	0.0105209	0.0562072	0.0716667	0.031976	0.0915936	0.0234765
EEFSEC	EEFSEC	turquoise	turquoise	0.264701	0.306306	0.145105	0.0198096	0.0352496	0.0127769	0.106869	-0.0350566
RAB7A	RAB7A	turquoise	turquoise	0.00550416	-0.129122	-0.0587148	-0.0431828	-0.0250681	0.247957	0.00245797	0.210645
CNBP	CNBP	green	green	0.0516846	0.0792228	-0.0121784	0.127318	0.15501	0.0401689	0.167005	0.0110334
COPG1	COPG1	grey	grey	0.0712599	0.145838	0.0696084	0.128287	0.127744	-0.0162208	0.130494	-0.0150548
MBD4	MBD4	grey	grey	-0.0376471	-0.141845	-0.041127	-0.0759278	-0.0806063	0.14485	-0.0679069	0.155346
IFT122	IFT122	grey	grey	0.0467817	0.00447238	0.0930838	-0.0154241	-0.0340926	0.0606243	0.00465831	0.107481
PLXND1	PLXND1	grey	grey	-0.0378502	-0.139491	-0.0132515	-0.0214678	-0.068703	0.0798244	-0.064688	0.094433
TMCC1	TMCC1	turquoise	turquoise	0.228878	0.111827	0.13653	-0.0723728	-0.0747046	0.198426	0.00515367	0.177605
PIK3R4	PIK3R4	grey	grey	0.0208484	-0.0265679	0.0230224	-0.0159321	-0.0256157	0.054537	-0.0144824	0.0584155
ATP2C1	ATP2C1	turquoise	turquoise	0.126561	-0.0772845	0.0291246	-0.0985922	-0.120195	0.297103	-0.0619779	0.276222
ASTE1	ASTE1	turquoise	turquoise	0.1908	0.211698	0.103806	0.0227804	0.0393584	0.0198393	0.0765795	-0.0147889
MRPL3	MRPL3	grey	grey	0.0348422	-0.00633752	0.0515788	0.0129606	-0.00850113	0.0611229	-0.00408764	0.0838849
CPNE4	CPNE4	blue	blue	0.124229	0.210122	0.299604	0.0381252	-0.00180985	-0.0430606	0.0709186	0.0793833
DNAJC13	DNAJC13	turquoise	turquoise	0.121949	-0.0184879	0.00312399	-0.0736288	-0.0719399	0.232863	-0.0303851	0.181467
UBA5	UBA5	grey	grey	0.101073	0.125021	0.0722089	0.0612834	0.070054	0.00863451	0.0881364	-0.00176977
TMEM108	TMEM108	blue	blue	0.144372	0.131324	0.394033	0.00638862	-0.0969073	-0.0733473	-0.0124608	0.086635
CDV3	CDV3	grey	grey	0.0125465	0.000629862	-0.0147207	0.04771	0.0527207	0.0686705	0.0487756	0.0515876
TOPBP1	TOPBP1	grey	grey	0.0174261	-0.0436903	0.00569528	-0.0171706	-0.0307143	0.083457	-0.0199861	0.0852042
TF	TF	grey	grey	0.139082	0.0866789	-0.0340811	0.00856045	0.0500183	0.0741229	0.087211	-0.00949083
RAB6B	RAB6B	brown	brown	0.119555	0.252451	0.135881	0.35285	0.265194	-0.132769	0.244214	-0.12323
RYK	RYK	grey	grey	0.0361278	-0.0512124	0.0712395	-0.0523558	-0.0749554	0.11867	-0.0414677	0.14865
CEP63	CEP63	turquoise	turquoise	0.0191425	-0.0850483	-0.0178855	-0.0482263	-0.0502547	0.137629	-0.0420629	0.133858
EPHB1	EPHB1	blue	blue	0.177225	0.194381	0.240968	0.0206542	-0.00977022	0.0038342	0.0587459	0.0786916
PPP2R3A	PPP2R3A	grey	grey	0.262779	0.302939	0.211694	0.0247097	0.0373528	0.0301119	0.126195	0.0320749
MSL2	MSL2	turquoise	turquoise	0.0773085	-0.0246068	-0.00474808	-0.0396529	-0.0527662	0.125534	-0.0280035	0.0859034
PCCB	PCCB	grey	grey	0.0374416	-0.0248413	0.0267486	-0.00700918	-0.0219492	0.0839158	-0.00172564	0.0874129
STAG1	STAG1	turquoise	turquoise	0.155445	-0.0650085	0.0148219	-0.173058	-0.15775	0.373182	-0.0787248	0.318372
NCK1	NCK1	turquoise	turquoise	0.0857147	-0.0117624	-0.0318445	-0.0600954	-0.0358633	0.183961	-0.0166452	0.133366
ARMC8	ARMC8	grey	grey	0.0885212	-0.0094449	0.0684363	-0.0220541	-0.0425586	0.140537	-0.00781679	0.153591
MRAS	MRAS	grey	grey	0.0956067	0.158411	0.125875	0.147913	0.110536	-0.0373785	0.133032	-0.0151779
CEP70	CEP70	blue	blue	0.111145	0.110607	0.164007	-2.80242e-05	-0.0160866	0.0250705	0.0321256	0.0707401
PIK3CB	PIK3CB	turquoise	turquoise	0.115499	-0.0286072	-0.0154429	-0.0624668	-0.0593633	0.170275	-0.0308905	0.0939519
COPB2	COPB2	green	green	0.0303491	0.00500464	0.00427087	0.0604087	0.0595881	0.0592443	0.0706607	0.0422882
CLSTN2	CLSTN2	blue	blue	0.161427	0.260149	0.386261	0.0973609	0.0153359	-0.0650871	0.0920546	0.093845
SLC25A36	SLC25A36	yellow	yellow	0.10445	0.00302257	0.0634129	-0.0104618	-0.0546297	0.0914659	-0.0234144	0.0779662
ZBTB38	ZBTB38	grey	grey	0.0954685	0.0391186	0.0958725	0.0357423	0.00783312	0.085907	0.0346882	0.107177
RASA2	RASA2	grey	grey	0.0660343	-0.0490952	0.0830437	-0.0814787	-0.083938	0.17288	-0.00911357	0.178493
RNF7	RNF7	green	green	0.0523384	0.19873	0.0214588	0.181083	0.225503	-0.0867201	0.244948	-0.10595
ATP1B3	ATP1B3	grey	grey	-0.0204206	-0.146863	-0.0362358	-0.0543482	-0.0196227	0.219645	0.0316807	0.175459
TFDP2	TFDP2	blue	blue	0.0716223	0.0192405	0.159337	-0.0265355	-0.0571853	0.0610385	-0.00325654	0.118703
GK5	GK5	grey	grey	0.0161411	-0.0625155	0.0470055	-0.0376968	-0.0560694	0.0665715	-0.0311439	0.0858641
XRN1	XRN1	turquoise	turquoise	0.157418	0.0361506	0.0670235	-0.0719943	-0.0675782	0.189297	-0.0030025	0.157017
ATR	ATR	turquoise	turquoise	0.0223811	-0.110741	-0.00636153	-0.107373	-0.106209	0.195483	-0.0722863	0.18224
TRPC1	TRPC1	blue	blue	0.0642558	0.0199839	0.205633	0.00598739	-0.057505	0.00456008	-0.00987083	0.0952688
U2SURP	U2SURP	grey	grey	0.153205	0.117111	0.0842984	0.0209177	0.024099	0.106849	0.0723507	0.0931875
CHST2	CHST2	grey	grey	0.0225998	0.143736	0.0281118	0.170369	0.182747	-0.0720126	0.171462	-0.0699477
SLC9A9	SLC9A9	turquoise	turquoise	0.217564	-0.106766	-0.14817	-0.237729	-0.184892	0.510817	-0.134242	0.329745
DIPK2A	DIPK2A	grey	grey	-0.00845394	-0.114566	0.0114374	-0.0443402	-0.0671912	0.099097	-0.0541414	0.125497
PLSCR1	PLSCR1	grey	grey	-0.132894	-0.350463	-0.159945	-0.154726	-0.109287	0.371667	-0.0777297	0.338174
HLTF	HLTF	yellow	yellow	0.190457	0.0899576	0.0259742	-0.0140623	-0.0253661	0.0944901	0.00953481	0.00796176
HPS3	HPS3	turquoise	turquoise	0.169269	0.0215846	-0.0817605	-0.0793465	-0.055552	0.197403	-0.0326249	0.0740214
RNF13	RNF13	turquoise	turquoise	0.135195	-0.0670666	-0.0587604	-0.0977201	-0.0900081	0.262475	-0.0464465	0.163136
PFN2	PFN2	black	black	0.077594	0.314908	0.0494849	0.294355	0.381524	-0.141049	0.334654	-0.153449
TSC22D2	TSC22D2	turquoise	turquoise	0.0323784	-0.159794	-0.0606874	-0.131774	-0.10439	0.313426	-0.0497723	0.258047
SERP1	SERP1	grey	grey	-0.0170794	-0.104841	-0.02777	0.00860938	-0.00625368	0.0924452	-0.00824235	0.082374
EIF2A	EIF2A	turquoise	turquoise	0.0960374	0.0716938	0.0269231	0.00253381	0.0189576	0.0938933	0.0570517	0.063068
SELENOT	SELENOT	grey	grey	0.0512225	0.0109852	0.0289442	0.0510462	0.0273264	0.0616307	0.0383577	0.0535479
MED12L	MED12L	yellow	yellow	0.350593	0.18452	0.139279	-0.0229543	-0.0454809	0.103514	0.0117008	0.00965948
P2RY14	P2RY14	red	red	0.197463	0.345924	0.392427	0.0380093	0.0226285	-0.0225034	0.125563	0.137855
P2RY13	P2RY13	grey	grey	0.00122315	-0.117469	-0.0681547	-0.031316	-0.0512938	0.139195	-0.0793536	0.126407
P2RY12	P2RY12	turquoise	turquoise	0.240751	-0.0170959	-0.163559	-0.129132	-0.102054	0.348159	-0.114037	0.173121
MBNL1	MBNL1	turquoise	turquoise	0.210438	-0.162094	-0.203595	-0.193704	-0.187437	0.44484	-0.141427	0.217053
RAP2B	RAP2B	grey	grey	0.0352009	0.0916181	0.0785504	0.0910344	0.0619973	-0.0455575	0.0751209	-0.02408
DHX36	DHX36	green	green	0.0885773	0.0949103	0.0435633	0.0346027	0.058921	0.0858867	0.108062	0.068826
GMPS	GMPS	grey	grey	0.0617875	0.0727197	0.0435642	0.0627112	0.0600111	0.037791	0.0761066	0.0342383
KCNAB1	KCNAB1	red	red	0.23429	0.388165	0.303427	0.0879741	0.0868345	-0.057922	0.175016	0.0128007
SSR3	SSR3	grey	grey	0.0195157	0.0114519	-0.00559835	0.043447	0.040571	0.0311933	0.0388949	0.0186177
TIPARP	TIPARP	grey	grey	0.0707819	0.031838	0.00454493	-0.00876591	-0.00328676	0.0676586	0.0345281	0.0369473
LEKR1	LEKR1	red	red	0.147807	0.209829	0.211048	0.0272751	0.00997976	-0.00825872	0.0689914	0.0583658
CCNL1	CCNL1	turquoise	turquoise	0.0856743	-0.040335	-0.0459392	-0.083537	-0.0511729	0.218269	0.00423794	0.131996
RSRC1	RSRC1	turquoise	turquoise	0.16488	0.0414029	0.0366795	-0.0753369	-0.0599138	0.211393	0.000671011	0.152573
GFM1	GFM1	grey	grey	0.0377598	-0.0297197	0.0403152	-0.00660469	-0.0304562	0.0660188	-0.014786	0.0767765
MFSD1	MFSD1	turquoise	turquoise	-0.0537386	-0.20795	-0.0896653	-0.100847	-0.0975336	0.22672	-0.0763655	0.204658
KPNA4	KPNA4	turquoise	turquoise	0.195752	0.132536	0.0277765	0.00970306	0.0251362	0.137946	0.0635658	0.0429028
PPM1L	PPM1L	yellow	yellow	0.176372	0.103465	0.20708	0.0305889	-0.0309075	0.0638219	0.0201079	0.100464
B3GALNT1	B3GALNT1	grey	grey	0.0493718	0.0612536	0.0425749	0.0659158	0.0452998	-0.0142009	0.0485919	-0.0218703
NMD3	NMD3	grey	grey	0.0310282	-0.0221236	0.0405805	-0.00770677	-0.0120745	0.0575919	0.00846138	0.0641053
PDCD10	PDCD10	grey	grey	0.0843233	0.10575	0.0352096	0.0718186	0.0810482	0.0219058	0.10107	0.00620953
SERPINI1	SERPINI1	blue	blue	0.0176353	-0.0103861	0.173973	0.157654	0.0119806	-0.0689253	-0.00722982	0.0348976
GOLIM4	GOLIM4	grey	grey	0.0747708	-0.017989	-0.0113224	-0.0242883	-0.0276443	0.0870214	-0.0036771	0.0480162
SEC62	SEC62	brown	brown	0.100825	0.231339	0.0271376	0.282997	0.295108	-0.0703081	0.261953	-0.106869
PHC3	PHC3	turquoise	turquoise	0.0875877	-0.0849402	0.0359725	-0.097512	-0.115953	0.225324	-0.0646427	0.207836
PRKCI	PRKCI	blue	blue	0.00455288	-0.0703185	0.0805311	-0.0104402	-0.0745216	0.0295316	-0.0532309	0.0770301
SKIL	SKIL	turquoise	turquoise	0.0221679	-0.160019	-0.0979076	-0.0953582	-0.092761	0.262385	-0.0657857	0.193036
SLC7A14	SLC7A14	blue	blue	0.0911809	0.15823	0.206945	0.115967	0.0598122	-0.0804469	0.0951395	-0.0131863
TNIK	TNIK	blue	blue	0.197732	0.236108	0.388135	0.0350844	-0.0133398	-0.0170334	0.0907602	0.118201
PLD1	PLD1	turquoise	turquoise	0.195595	-0.0553862	-0.150809	-0.125533	-0.0889847	0.304791	-0.0647229	0.121893
FNDC3B	FNDC3B	turquoise	turquoise	0.0777075	-0.110231	-0.0503888	-0.153007	-0.125093	0.308513	-0.0614524	0.223031
NCEH1	NCEH1	brown	brown	0.023052	0.0554911	0.0635789	0.132823	0.0707009	-0.0418775	0.0576754	-0.014649
NLGN1	NLGN1	blue	blue	0.223078	0.352956	0.546552	0.10937	0.010139	-0.188381	0.116079	0.0143694
NAALADL2	NAALADL2	red	red	0.0619151	-0.0599724	0.174846	-0.108237	-0.141503	0.183023	-0.0732311	0.315788
TBL1XR1	TBL1XR1	turquoise	turquoise	0.0626208	-0.218134	-0.0444292	-0.165093	-0.209613	0.301666	-0.167714	0.246137
ZMAT3	ZMAT3	grey	grey	-0.0485157	-0.207893	-0.00984571	-0.0253236	-0.0910851	0.170332	-0.107798	0.225817
PIK3CA	PIK3CA	yellow	yellow	0.135542	0.0285429	0.0514189	-0.0225138	-0.0416342	0.127046	0.000341804	0.0942553
ZNF639	ZNF639	grey	grey	0.0709119	0.116174	0.0512468	0.0695375	0.0749914	-0.0160521	0.0829565	-0.0245577
MFN1	MFN1	grey	grey	0.0761893	0.017622	0.100179	-0.00703293	-0.028798	0.0804172	0.0128416	0.110691
GNB4	GNB4	red	red	-0.124069	-0.347346	-0.124203	-0.157397	-0.15047	0.352773	-0.186056	0.386407
ACTL6A	ACTL6A	grey	grey	0.119745	0.142913	0.0543628	0.0209088	0.03724	0.026749	0.0702446	0.00878312
NDUFB5	NDUFB5	brown	brown	0.0317383	0.206153	0.00651475	0.280695	0.315337	-0.112359	0.265429	-0.13079
USP13	USP13	blue	blue	0.0663864	0.0479963	0.143674	0.0173945	-0.0131302	0.02651	0.0199914	0.0906256
PEX5L	PEX5L	blue	blue	0.140966	0.126084	0.35296	0.0606679	-0.0454664	-0.0589041	0.0343235	0.0942391
TTC14	TTC14	yellow	yellow	0.246201	0.211807	0.155101	-0.00928646	-0.00292856	0.0867676	0.0777697	0.0739623
FXR1	FXR1	turquoise	turquoise	0.158001	0.0822055	0.0692475	0.0126841	0.0153228	0.151755	0.0725577	0.107725
DNAJC19	DNAJC19	grey	grey	0.2105	0.288034	0.121256	0.0848393	0.113135	-0.0100511	0.156762	-0.0439025
ATP11B	ATP11B	grey	grey	0.0932906	0.0153354	0.109677	-0.0405593	-0.0567002	0.138363	0.0103762	0.159721
DCUN1D1	DCUN1D1	grey	grey	0.0853338	0.0115283	0.054022	-0.0108556	-0.0253614	0.0877213	0.00126126	0.0888231
MCCC1	MCCC1	grey	grey	0.00872106	-0.109225	0.0272593	-0.0647517	-0.0795291	0.151587	-0.0544663	0.186125
B3GNT5	B3GNT5	grey	grey	-0.160712	-0.405949	-0.164001	-0.196437	-0.161715	0.394732	-0.140916	0.399441
KLHL6	KLHL6	turquoise	turquoise	-0.0209043	-0.206854	-0.160007	-0.145704	-0.0879091	0.328357	-0.0414173	0.223595
KLHL24	KLHL24	grey	grey	0.0621368	-0.0538885	0.0147832	-0.0358614	-0.0428904	0.13302	-0.00221663	0.111184
YEATS2	YEATS2	grey	grey	0.0589679	-0.0430647	0.100977	-0.063127	-0.0821693	0.152117	-0.0255467	0.190552
ABCC5	ABCC5	yellow	yellow	0.254588	0.211944	0.178054	0.00606853	-0.0032542	0.0587019	0.0588623	0.0457532
EIF2B5	EIF2B5	grey	grey	0.0480564	0.0723608	0.0370548	0.0548161	0.0462017	-0.00868866	0.0561127	-0.00716939
DVL3	DVL3	grey	grey	0.0484299	0.0337737	0.0509717	0.0293708	0.00814042	0.0291537	0.0173261	0.0470854
AP2M1	AP2M1	brown	brown	-0.00980099	0.0126745	0.0255015	0.231739	0.158436	-0.0258539	0.11201	-0.000699432
CAMK2N2	CAMK2N2	brown	brown	0.00476918	0.094	0.0449574	0.224715	0.184874	-0.107556	0.155675	-0.0957372
PSMD2	PSMD2	grey	grey	0.0270267	0.0808433	0.026451	0.152736	0.139792	-0.0339455	0.120609	-0.0328753
EIF4G1	EIF4G1	grey	grey	0.132536	0.186872	0.0787855	0.116778	0.114871	-0.00219149	0.138025	-0.0294183
FAM131A	FAM131A	brown	brown	0.0697416	0.0876583	0.149691	0.126701	0.0221597	-0.0894394	0.0381207	-0.0274184
VPS8	VPS8	turquoise	turquoise	0.0842469	-0.090783	0.0380768	-0.0974235	-0.113575	0.232404	-0.0689063	0.220191
C3orf70	C3orf70	yellow	yellow	0.168172	0.09428	0.0383758	0.0164177	0.00398497	0.0704975	0.0221905	0.010174
MAP3K13	MAP3K13	blue	blue	0.0244694	-0.0655677	0.128176	-0.0172684	-0.0810702	0.0538184	-0.0552638	0.130167
SENP2	SENP2	turquoise	turquoise	0.223776	0.164188	0.0447141	0.0201653	0.0248466	0.0880749	0.0598679	-0.00939101
TRA2B	TRA2B	turquoise	turquoise	0.0650868	-0.0540473	-0.0391478	-0.0832241	-0.0533013	0.215061	-0.00990933	0.156302
ETV5	ETV5	turquoise	turquoise	0.114682	0.0369958	0.0471187	-0.0179873	-0.0203181	0.156694	-0.00101008	0.143466
DGKG	DGKG	blue	blue	0.121859	0.13511	0.283504	0.0154105	-0.0230803	-0.00987354	0.048631	0.0962644
DNAJB11	DNAJB11	green	green	0.0434317	0.112736	-0.00459432	0.112939	0.150105	0.00777171	0.185771	-0.0269707
EIF4A2	EIF4A2	brown	brown	0.0155088	-0.0188632	0.00730459	0.223826	0.13525	-0.00661028	0.0997668	-0.0202797
ST6GAL1	ST6GAL1	turquoise	turquoise	-0.202777	-0.566982	-0.226265	-0.308133	-0.334955	0.480367	-0.342944	0.507289
SST	SST	brown	brown	0.0446477	0.179741	-0.0166697	0.23251	0.270695	-0.103239	0.220931	-0.146603
BCL6	BCL6	grey	grey	-0.055921	-0.181461	-0.0774819	-0.105618	-0.0799305	0.20327	-0.0234142	0.161727
LPP	LPP	turquoise	turquoise	-0.0833506	-0.408076	-0.17795	-0.248043	-0.238231	0.435968	-0.216506	0.393604
P3H2	P3H2	turquoise	turquoise	0.205604	7.29596970750082e-05	-0.114723	-0.0959692	-0.0812263	0.267715	-0.0731222	0.106863
IL1RAP	IL1RAP	red	red	0.0387792	-0.0560213	0.0822692	-0.0866633	-0.0840842	0.246748	-0.0215045	0.311292
CCDC50	CCDC50	turquoise	turquoise	0.163848	0.0270959	-0.020759	-0.0548071	-0.0488187	0.207668	-0.0134181	0.127382
FGF12	FGF12	blue	blue	0.204272	0.310099	0.544263	0.127229	-0.000975955	-0.157401	0.0895074	0.0589682
MB21D2	MB21D2	grey	grey	-0.086464	-0.253537	-0.0800817	-0.129935	-0.0787897	0.331918	-0.00825315	0.301795
OPA1	OPA1	yellow	yellow	0.0864609	-0.0285265	0.0586749	0.0264401	-0.0239459	0.10653	-0.00277242	0.0996393
ATP13A3	ATP13A3	turquoise	turquoise	0.0437542	-0.11596	-0.0297962	-0.0975099	-0.0914617	0.25612	-0.0437152	0.204268
TMEM44	TMEM44	grey	grey	0.162172	0.200114	0.0882995	0.0483689	0.0583674	-0.0010388	0.0967341	-0.0292364
LSG1	LSG1	turquoise	turquoise	0.0904332	0.0688583	0.0156608	0.000792963	0.0186069	0.0792763	0.0392755	0.0448251
XXYLT1	XXYLT1	grey	grey	0.0028217	-0.0664603	-0.0227847	-0.0478775	-0.0364298	0.110667	-0.0317585	0.0961553
ACAP2	ACAP2	turquoise	turquoise	0.174023	0.0132885	0.00959607	-0.106698	-0.0896725	0.273726	-0.0372255	0.195763
PPP1R2	PPP1R2	grey	grey	0.0904989	0.132559	0.0376394	0.0832961	0.103003	0.0226197	0.131561	-0.00226456
APOD	APOD	green	green	0.0209848	0.110865	-0.0504808	0.130011	0.205747	-0.0103019	0.224905	-0.0658827
TNK2	TNK2	blue	blue	-0.0124365	-0.0660013	0.0782891	-0.00941626	-0.0632508	0.0428051	-0.0373411	0.113781
TFRC	TFRC	grey	grey	-0.0746288	-0.183144	-0.0614765	-0.0830106	-0.0292698	0.241009	0.0454493	0.209011
PCYT1A	PCYT1A	grey	grey	0.0418798	0.0104237	0.0127438	-0.00475618	-0.00656396	0.0693379	0.0210682	0.0622268
UBXN7	UBXN7	turquoise	turquoise	0.124629	0.0404059	0.045673	-0.0299949	-0.0295461	0.126133	-4.25029e-05	0.0949946
RNF168	RNF168	grey	grey	0.0271199	-0.0495768	0.00124093	-0.0249419	-0.0192318	0.136541	0.00572813	0.120274
FBXO45	FBXO45	brown	brown	0.0418216	0.0458808	0.0361889	0.0838778	0.0426981	-0.0273333	0.035554	-0.0262052
NRROS	NRROS	turquoise	turquoise	0.348096	0.28469	-0.0981506	-0.000325248	0.0713885	0.0894241	0.0998805	-0.181141
PIGX	PIGX	turquoise	turquoise	-0.01581	-0.121491	-0.027085	-0.0256524	-0.0345928	0.145044	-0.0316024	0.142677
CEP19	CEP19	green	green	0.0644647	0.185325	0.0958838	0.12515	0.134986	-0.0657528	0.182901	-0.0380719
PAK2	PAK2	turquoise	turquoise	0.162225	0.0278575	-0.0402833	-0.0379449	-0.0154611	0.203496	0.0317409	0.0988578
SENP5	SENP5	turquoise	turquoise	0.071013	0.00892931	0.0577492	-0.0227618	-0.0185875	0.148972	0.0208047	0.152847
NCBP2	NCBP2	grey	grey	0.0541602	0.0598144	0.0265591	0.0794893	0.0777676	0.026385	0.0866211	0.0147493
NCBP2AS2	NCBP2AS2	black	black	0.0372165	0.163579	-0.00488398	0.185068	0.250253	-0.0684082	0.199678	-0.0955353
DLG1	DLG1	red	red	0.149499	0.0317149	0.167419	-0.0658935	-0.0853212	0.156846	0.00215471	0.211905
RUBCN	RUBCN	grey	grey	0.0119755	-0.124823	-0.00473704	-0.0651455	-0.080583	0.204028	-0.0458229	0.201252
FYTTD1	FYTTD1	grey	grey	0.0802957	0.0725427	0.0540413	0.0392157	0.0480256	0.0764532	0.0779326	0.0688775
LRCH3	LRCH3	turquoise	turquoise	0.165827	0.0085772	0.028049	-0.0984247	-0.0782013	0.242494	-0.012959	0.173921
LMLN	LMLN	grey	grey	0.0940744	0.0523331	0.0449866	0.00211477	-0.0128754	0.041058	0.0130943	0.0252455
PIGG	PIGG	grey	grey	0.025228	-0.0441594	0.00758197	-0.0400537	-0.0433854	0.103292	-0.0326881	0.107275
ATP5ME	ATP5ME	black	black	0.00919382	0.236802	-0.00317427	0.317723	0.432021	-0.139769	0.338072	-0.153992
PCGF3	PCGF3	yellow	yellow	0.0599079	-0.0288616	0.034008	-0.019665	-0.0502715	0.0965516	-0.0313678	0.0986492
CPLX1	CPLX1	brown	brown	0.0265	0.0425593	0.0903345	0.181483	0.0763173	-0.0864991	0.0597596	-0.0534161
GAK	GAK	grey	grey	-0.0138638	-0.159675	-0.0364608	-0.0778904	-0.104073	0.183366	-0.104177	0.199078
TMEM175	TMEM175	yellow	yellow	0.211924	0.234304	0.161272	0.0348317	0.0319365	0.000487666	0.0832427	0.00275797
CTBP1	CTBP1	brown	brown	0.00772071	-0.0174275	0.0291103	0.0865116	0.0141759	-0.0272733	0.0113192	-0.0172917
MAEA	MAEA	grey	grey	0.0672172	0.0292047	0.0277317	0.0242029	0.0134515	0.0780045	0.0321662	0.0635594
UVSSA	UVSSA	yellow	yellow	0.0404933	-0.0515427	0.00800536	-0.0504239	-0.0693653	0.0897732	-0.0482626	0.0781466
SLBP	SLBP	grey	grey	0.049411	0.0154042	0.011405	0.030608	0.0193993	0.0427938	0.0216428	0.0213558
LETM1	LETM1	grey	grey	0.0525697	0.0648622	0.0465989	0.0661688	0.0497106	-0.000362766	0.0619945	-0.000451227
NSD2	NSD2	grey	grey	0.135936	0.123686	0.137028	0.0158565	0.00317002	0.0747208	0.0462182	0.093123
NELFA	NELFA	grey	grey	0.039161	-0.0397856	0.0624633	-0.0325562	-0.0625487	0.0535528	-0.0418651	0.0768923
C4orf48	C4orf48	brown	brown	-0.00901675	0.102055	0.00113149	0.194778	0.208278	-0.0742614	0.167882	-0.069945
NAT8L	NAT8L	blue	blue	-0.00334953	-0.0667112	0.0954476	0.138952	-0.0227841	-0.107105	-0.0415603	-0.0501619
MXD4	MXD4	grey	grey	0.0185723	-0.0379395	-0.00174055	0.0168324	-0.00456107	0.0753294	-0.00123059	0.0856641
ZFYVE28	ZFYVE28	blue	blue	0.120667	0.107961	0.247569	-0.0128094	-0.0501805	0.0126883	0.0148424	0.0984202
RNF4	RNF4	grey	grey	0.0134611	-0.0432497	0.0024207	-0.0272785	-0.0310349	0.0965204	-0.0163667	0.0909636
FAM193A	FAM193A	turquoise	turquoise	0.223614	0.111404	0.0765563	-0.0648682	-0.0562487	0.184893	0.0136712	0.120557
SH3BP2	SH3BP2	yellow	yellow	0.0512941	-0.0847263	-0.0783332	-0.0796133	-0.0820982	0.145094	-0.0779274	0.075134
ADD1	ADD1	grey	grey	0.0660778	-0.026112	0.0535109	-0.0040653	-0.0240089	0.137834	0.0166314	0.149194
NOP14	NOP14	grey	grey	0.0789694	0.111969	0.0301839	0.0476516	0.0662128	0.0152264	0.0722008	-0.010054
GRK4	GRK4	grey	grey	0.0908115	0.0464758	0.0735035	-0.0126105	-0.0197446	0.0345476	0.0199579	0.0310686
HTT	HTT	turquoise	turquoise	0.0838427	-0.0302673	0.0934217	-0.0500517	-0.0829238	0.163	-0.0257411	0.177495
RGS12	RGS12	grey	grey	-0.0775348	-0.268111	-0.0497632	-0.0969835	-0.13362	0.198104	-0.141354	0.244342
LRPAP1	LRPAP1	brown	brown	0.0461952	0.170263	0.0307026	0.196702	0.22584	-0.0636004	0.195972	-0.068198
NSG1	NSG1	black	black	0.0409685	0.207371	0.0465106	0.249854	0.3005	-0.112847	0.248423	-0.110235
STX18	STX18	turquoise	turquoise	0.0830242	0.0186161	0.0405551	-0.0324902	-0.0128918	0.156164	0.0269765	0.145886
STK32B	STK32B	grey	grey	-0.0963923	-0.260134	-0.0989606	-0.130298	-0.1131	0.250879	-0.11429	0.267871
CRMP1	CRMP1	blue	blue	0.031305	0.0524975	0.15129	0.117177	0.0270287	-0.0744488	0.0394705	-0.00211186
C4orf50	C4orf50	blue	blue	0.0908402	0.154456	0.263198	0.0411465	-0.0173237	-0.04997	0.0519668	0.0641395
PPP2R2C	PPP2R2C	blue	blue	0.0626657	0.108923	0.214902	0.183396	0.0900348	-0.0854909	0.106737	0.00999621
MRFAP1	MRFAP1	black	black	0.0358955	0.187264	0.00429464	0.277371	0.33911	-0.0858704	0.276323	-0.108677
KIAA0232	KIAA0232	grey	grey	0.0529161	-0.0827535	0.0456913	-0.0482562	-0.0859789	0.156515	-0.0528425	0.161467
TBC1D14	TBC1D14	turquoise	turquoise	0.0155934	-0.188334	-0.113134	-0.155748	-0.118145	0.333958	-0.0889831	0.250483
GRPEL1	GRPEL1	green	green	0.016333	0.115808	0.00433619	0.151046	0.183491	-0.045243	0.190108	-0.0521822
SORCS2	SORCS2	blue	blue	0.0963577	0.133128	0.185232	-0.0208267	-0.0314673	-0.0234792	0.0318148	0.0521227
AFAP1	AFAP1	grey	grey	0.021017	-0.0292438	0.0408534	-0.0192146	-0.0423664	0.0460351	-0.0172581	0.0624907
ABLIM2	ABLIM2	blue	blue	0.143121	0.236262	0.332749	0.0772924	0.0293836	-0.0593651	0.106886	0.0694526
SH3TC1	SH3TC1	turquoise	turquoise	-0.102297	-0.303639	-0.124733	-0.148802	-0.141728	0.294057	-0.132961	0.279436
ACOX3	ACOX3	turquoise	turquoise	0.113921	0.0447925	-0.0326212	-0.0243704	-0.0128301	0.0972152	0.00766933	0.0156055
SLC2A9	SLC2A9	turquoise	turquoise	-0.013493	-0.134089	-0.0735049	-0.0868527	-0.0742068	0.190196	-0.0751872	0.169883
WDR1	WDR1	grey	grey	0.0361817	-0.00826092	-0.00833623	0.0302593	0.0200521	0.0826661	0.031582	0.0652642
RAB28	RAB28	grey	grey	0.0742087	-0.00110576	0.0831605	-0.0162054	-0.0429291	0.0797305	-0.0110084	0.108809
BOD1L1	BOD1L1	grey	grey	0.049604	-0.0439627	0.0176373	-0.0369438	-0.0460351	0.138383	-0.0315401	0.137949
CPEB2	CPEB2	yellow	yellow	0.117685	0.000354596	0.0827378	-0.0314057	-0.0673374	0.0947299	-0.0242531	0.094113
CC2D2A	CC2D2A	red	red	0.0967641	0.125436	0.144094	0.0201011	0.0173296	0.0145745	0.0615221	0.0647919
FBXL5	FBXL5	grey	grey	0.0756303	0.00823962	0.0754904	-0.0302329	-0.034527	0.113853	0.0168394	0.108073
TAPT1	TAPT1	grey	grey	0.0118853	-0.107679	0.00315212	-0.0499634	-0.0606514	0.16465	-0.0488399	0.172069
LDB2	LDB2	blue	blue	0.0967817	0.145714	0.405703	0.0591455	-0.0573955	-0.123965	0.00615611	0.0713565
QDPR	QDPR	grey	grey	-0.00373298	-0.0877545	-0.0059731	0.03953	0.0210914	0.0636968	0.0243112	0.071195
LAP3	LAP3	turquoise	turquoise	-0.0227453	-0.116282	-0.0777349	-0.057782	-0.0125291	0.201794	0.0100252	0.152486
MED28	MED28	grey	grey	0.00158017	-0.00850414	-0.0262742	0.061939	0.0736325	0.0442484	0.0605018	0.033841
LCORL	LCORL	turquoise	turquoise	0.149103	-0.000250749	0.00882204	-0.0737758	-0.0719985	0.224628	-0.0305149	0.15625
SLIT2	SLIT2	blue	blue	0.0429951	0.00935281	0.218599	0.0102081	-0.074231	-0.0182367	-0.0307436	0.0922478
PACRGL	PACRGL	grey	grey	0.0374784	-0.0447437	0.0630892	-0.0175007	-0.0486654	0.0739481	-0.0339144	0.0956
KCNIP4	KCNIP4	blue	blue	0.0830473	0.241896	0.553463	0.104638	-0.0749205	-0.377517	-0.0219264	-0.113658
PPARGC1A	PPARGC1A	blue	blue	0.128632	0.191526	0.232224	0.0618981	0.0385201	-0.0440524	0.102755	0.0321853
DHX15	DHX15	turquoise	turquoise	0.0723881	-0.0154358	-0.00136483	-0.0387201	-0.0220659	0.154592	0.0144066	0.109448
CCDC149	CCDC149	red	red	0.033481	-0.00514522	0.0752247	-0.0035246	-0.0108912	0.0985295	0.0214391	0.152469
SEPSECS	SEPSECS	turquoise	turquoise	0.0905999	0.0893047	0.0575454	-0.00111987	0.00730346	0.0543818	0.0375968	0.0464979
ANAPC4	ANAPC4	grey	grey	0.066952	0.0418688	0.0494436	0.000394775	0.00682644	0.0714501	0.0203047	0.0825885
SEL1L3	SEL1L3	blue	blue	0.14414	0.228611	0.290707	0.0372932	0.0127975	-0.0407956	0.0934234	0.0570931
RBPJ	RBPJ	turquoise	turquoise	0.0551763	-0.133435	-0.0499761	-0.0976201	-0.0840637	0.254168	-0.0374225	0.187016
TBC1D19	TBC1D19	grey	grey	0.0809708	0.042102	0.132716	-0.030415	-0.0520572	0.0417456	-0.0097473	0.0823038
STIM2	STIM2	grey	grey	0.058611	8.59592679024547e-05	0.0749797	-0.0178263	-0.0202836	0.138248	0.023957	0.153045
PCDH7	PCDH7	blue	blue	0.175319	0.21937	0.436645	0.102848	-0.0255028	-0.126757	0.0497321	0.0390889
ARAP2	ARAP2	red	red	0.0841326	-0.000563121	0.145798	-0.0213098	-0.0432174	0.102934	0.0377186	0.167623
NWD2	NWD2	blue	blue	0.140912	0.246976	0.343726	0.0906929	0.0292198	-0.0897589	0.101958	0.0471922
C4orf19	C4orf19	turquoise	turquoise	0.337699	0.180768	-0.0959168	-0.0480255	-0.00896484	0.189186	0.0122468	-0.0561221
RELL1	RELL1	grey	grey	0.00986662	-0.0505035	-0.00994336	-0.0372263	-0.0140647	0.134274	0.0212973	0.127471
TBC1D1	TBC1D1	turquoise	turquoise	-0.0902534	-0.287522	-0.0759375	-0.172876	-0.169844	0.331987	-0.147721	0.356125
KLF3	KLF3	turquoise	turquoise	0.139247	0.00598824	-0.0923352	-0.0609365	-0.0183393	0.199529	0.0104664	0.0696322
TLR1	TLR1	turquoise	turquoise	-0.080644	-0.240683	-0.129284	-0.123513	-0.110316	0.270708	-0.120521	0.267219
FAM114A1	FAM114A1	turquoise	turquoise	0.0171204	-0.0881268	-0.080022	-0.0641834	-0.0393191	0.17351	-0.0348955	0.120221
TMEM156	TMEM156	turquoise	turquoise	-0.134619	-0.339695	-0.166674	-0.18996	-0.156286	0.355461	-0.165344	0.362375
KLHL5	KLHL5	turquoise	turquoise	-0.0604409	-0.27612	-0.113513	-0.160581	-0.137258	0.343639	-0.119695	0.324802
WDR19	WDR19	grey	grey	0.00511017	-0.0347149	0.0915581	-0.0349926	-0.0636899	0.0311536	-0.0352081	0.0739725
RFC1	RFC1	turquoise	turquoise	0.0888376	0.0325399	0.0128391	0.000602837	0.0156877	0.11227	0.0460195	0.0766693
LIAS	LIAS	grey	grey	0.105221	0.137077	0.0761864	0.0554976	0.0639345	0.0144482	0.0936043	0.0113182
SMIM14	SMIM14	grey	grey	0.160096	0.211495	0.162173	0.10091	0.0867074	0.0180635	0.133243	0.0467452
UBE2K	UBE2K	turquoise	turquoise	0.0716167	-0.0508482	0.0220655	-0.0145702	-0.0272327	0.201773	0.00529933	0.184528
PDS5A	PDS5A	turquoise	turquoise	0.112419	-0.0637385	0.00133236	-0.101366	-0.104434	0.249393	-0.0522323	0.20151
N4BP2	N4BP2	grey	grey	0.0166455	-0.10463	-0.0146786	-0.0562414	-0.0687603	0.154475	-0.0446831	0.142342
RHOH	RHOH	turquoise	turquoise	0.219046	0.0881778	-0.129242	-0.0564992	0.00346151	0.186448	0.0367308	-0.0263399
RBM47	RBM47	turquoise	turquoise	-0.00847655	-0.292269	-0.236587	-0.203349	-0.156323	0.442953	-0.135513	0.298922
APBB2	APBB2	grey	grey	0.254629	0.187341	0.21219	-0.0176036	-0.0284591	0.0535428	0.0670974	0.0621102
UCHL1	UCHL1	brown	brown	-0.0395713	0.0125496	0.0284379	0.326168	0.237227	-0.109096	0.164519	-0.0742212
LIMCH1	LIMCH1	blue	blue	0.0981075	-0.00900037	0.248865	-0.0338035	-0.105697	0.000636693	-0.025426	0.102446
TMEM33	TMEM33	brown	brown	0.0170811	0.000834235	0.0137931	0.0754573	0.0222987	-0.0160378	0.0169311	-0.0184116
SLC30A9	SLC30A9	grey	grey	0.103338	0.0616518	0.0499867	0.0457012	0.0376595	0.08698	0.0494624	0.0632916
ATP8A1	ATP8A1	yellow	yellow	0.38154	0.273129	0.17959	0.0560702	0.0110143	0.0315331	0.0988167	-0.0700258
KCTD8	KCTD8	blue	blue	0.0462497	-0.0444884	0.172239	-0.0381627	-0.11461	-0.0113428	-0.0675994	0.0676136
GUF1	GUF1	grey	grey	0.088352	0.0883565	0.0847184	0.0234939	0.0115872	0.0289815	0.0364352	0.0432241
GNPDA2	GNPDA2	grey	grey	0.039534	0.024765	0.0411494	0.0358131	0.0143404	0.00706849	0.0257569	0.00807998
GABRA2	GABRA2	blue	blue	0.139188	0.216872	0.330085	0.107981	0.0334605	-0.0813943	0.0902738	0.0414325
GABRA4	GABRA4	blue	blue	0.0741833	0.0750597	0.250757	0.0855297	-0.0282581	-0.0843111	0.00919084	0.0239732
GABRB1	GABRB1	blue	blue	0.216297	0.344358	0.452124	0.13949	0.0683649	-0.126647	0.152629	0.0345945
COMMD8	COMMD8	turquoise	turquoise	0.122375	0.141418	-0.0158376	0.0690434	0.0942555	0.00714857	0.0963807	-0.0745774
NFXL1	NFXL1	yellow	yellow	0.113205	0.0340874	0.0292834	-0.0160511	-0.0317009	0.0661298	-0.00453943	0.034314
TEC	TEC	turquoise	turquoise	0.25054	0.147153	-0.0867165	-0.0262192	0.0132913	0.129678	0.0415513	-0.077857
SLAIN2	SLAIN2	turquoise	turquoise	0.0664782	-0.032916	0.0188551	-0.0446422	-0.0595201	0.15036	-0.0251373	0.131082
FRYL	FRYL	turquoise	turquoise	0.0765168	-0.121358	0.0143482	-0.135999	-0.138371	0.26059	-0.0525843	0.243085
OCIAD1	OCIAD1	brown	brown	-0.00923094	-0.0703405	0.0346439	0.11094	0.0286618	0.0123454	0.0077098	0.0373852
OCIAD2	OCIAD2	grey	grey	0.0961687	0.289126	0.148278	0.192128	0.222345	-0.112053	0.242848	-0.0686179
DCUN1D4	DCUN1D4	grey	grey	0.0324868	-0.0434728	0.069108	-0.00765736	-0.0396753	0.080755	-0.0132976	0.108493
SGCB	SGCB	grey	grey	0.0279458	0.047844	0.0631723	0.060365	0.0305305	-0.0269847	0.0352128	0.00387933
USP46	USP46	blue	blue	0.129066	0.207646	0.188376	0.127138	0.0979004	-0.0220247	0.142759	0.0397952
SCFD2	SCFD2	turquoise	turquoise	0.0178924	-0.132148	0.0220301	-0.127843	-0.131081	0.237326	-0.073373	0.259175
FIP1L1	FIP1L1	grey	grey	0.215031	0.320867	0.114682	0.0967548	0.125981	-0.0342017	0.164741	-0.0857811
LNX1	LNX1	blue	blue	0.06146	0.0409221	0.173063	0.02465	-0.0300733	-0.0280205	-0.00412772	0.0367934
CHIC2	CHIC2	turquoise	turquoise	0.128323	0.04989	0.0170743	-0.0257842	-0.0188512	0.124763	0.0215843	0.0716357
TMEM165	TMEM165	turquoise	turquoise	-0.00462272	-0.191634	-0.0451459	-0.134039	-0.109405	0.24811	-0.0603505	0.235338
CLOCK	CLOCK	grey	grey	0.133317	0.0729189	0.107851	0.0057803	-0.024972	0.117308	0.0206369	0.121603
EXOC1	EXOC1	grey	grey	0.00338378	-0.109047	0.00359437	-0.0612331	-0.0756393	0.136187	-0.0645162	0.148621
CEP135	CEP135	turquoise	turquoise	0.0822049	0.0416191	0.0240282	-0.0328502	-0.0254629	0.0940713	0.00569588	0.0740643
AASDH	AASDH	grey	grey	0.054204	-0.0271943	0.0239556	-0.0387791	-0.0516932	0.0839607	-0.0357617	0.071936
PAICS	PAICS	grey	grey	0.0411559	0.0700929	0.0159563	0.0631837	0.0704083	-0.00186373	0.0788346	-0.0153183
SRP72	SRP72	grey	grey	0.0655423	0.0555473	0.0287067	0.0582441	0.0549253	0.0461961	0.0626427	0.0293622
HOPX	HOPX	brown	brown	-0.033121	-0.126652	0.0296107	0.0849811	-0.0112268	0.00944258	-0.0345989	0.049834
POLR2B	POLR2B	grey	grey	-0.00274072	-0.0939182	0.00826768	-0.015044	-0.0478434	0.0869703	-0.0312813	0.0929857
IGFBP7	IGFBP7	green	green	0.0181868	0.126619	-0.0141627	0.136007	0.198977	-0.0468699	0.228485	-0.0660165
ADGRL3	ADGRL3	blue	blue	0.150292	0.18568	0.504646	0.0629334	-0.0681196	-0.146146	0.027904	0.0629689
EPHA5	EPHA5	blue	blue	0.207583	0.429862	0.406266	0.173232	0.144289	-0.158267	0.220783	-0.0246299
CENPC	CENPC	grey	grey	0.0532078	-0.0120419	0.0769528	-0.0494889	-0.0606151	0.109217	-0.0129678	0.131001
UBA6	UBA6	grey	grey	0.00942892	-0.0959631	0.0373069	-0.0634309	-0.0853817	0.130742	-0.0510412	0.154917
UTP3	UTP3	grey	grey	0.0647906	0.103492	0.0115105	0.0904361	0.100263	-0.0201231	0.103077	-0.0544833
RUFY3	RUFY3	grey	grey	0.0871634	0.0457138	0.12516	0.0591754	0.0242959	0.0917664	0.0548486	0.13163
GRSF1	GRSF1	grey	grey	-0.00449478	-0.0562439	0.0216877	0.0444669	0.0015002	0.0442278	0.00214359	0.0603376
MOB1B	MOB1B	grey	grey	-0.0474804	-0.228446	-0.0605468	-0.100408	-0.123125	0.237672	-0.130743	0.252662
SLC4A4	SLC4A4	blue	blue	0.111972	0.149243	0.191606	0.0463076	0.0243413	-0.0390793	0.0848918	0.0227078
ANKRD17	ANKRD17	turquoise	turquoise	0.109256	-0.103252	0.0400687	-0.119415	-0.145759	0.280045	-0.0833913	0.254718
MTHFD2L	MTHFD2L	grey	grey	0.0196326	-0.0456032	0.0151406	-0.0332726	-0.0258631	0.0787264	-0.0176511	0.0780843
PARM1	PARM1	brown	brown	0.0321753	0.0318011	0.0937975	0.0951469	0.0353222	-0.0283526	0.0333721	0.0197367
RCHY1	RCHY1	grey	grey	0.103837	0.0615218	0.0730447	0.011393	0.00409574	0.066538	0.0415068	0.0593908
CDKL2	CDKL2	grey	grey	0.0349439	0.0575134	0.110893	0.0532679	0.0171628	-0.033556	0.0339694	0.018627
G3BP2	G3BP2	grey	grey	0.0484471	0.0189979	0.0331955	0.139185	0.0864348	0.0243734	0.077215	0.0155222
USO1	USO1	yellow	yellow	0.0863512	-0.0173249	0.0229415	-0.0253569	-0.041907	0.139647	-0.00339166	0.121611
SDAD1	SDAD1	grey	grey	0.0240439	-0.0442639	0.0259883	-0.0155382	-0.0339692	0.0869247	-0.0223061	0.0950594
NUP54	NUP54	grey	grey	0.00987644	-0.0861148	0.00691414	-0.0536	-0.0615364	0.0994855	-0.0270051	0.0958883
SCARB2	SCARB2	turquoise	turquoise	0.124103	0.00220499	-0.0109732	-0.016715	-0.027785	0.135497	0.00369764	0.0599498
CCNI	CCNI	yellow	yellow	0.0407808	-0.0919494	-0.0016708	0.0484876	-0.0242568	0.109991	-0.0274416	0.0814089
CCNG2	CCNG2	yellow	yellow	0.038126	-0.032199	0.0106062	0.012958	-0.033658	0.0381814	-0.042248	0.0246464
CNOT6L	CNOT6L	turquoise	turquoise	0.101404	0.0141353	0.0357993	-0.0484243	-0.0393762	0.151355	0.019823	0.112244
MRPL1	MRPL1	grey	grey	0.0569046	0.0299071	0.034531	0.00837938	0.00714485	0.0693665	0.0340098	0.0639629
FRAS1	FRAS1	blue	blue	0.0907902	0.141683	0.279768	0.0311534	-0.031338	-0.064895	0.0225024	0.0533086
ANXA3	ANXA3	turquoise	turquoise	0.300746	0.264804	-0.0983645	0.0390218	0.112033	0.0446928	0.13189	-0.193794
BMP2K	BMP2K	turquoise	turquoise	0.0243829	-0.342536	-0.244392	-0.270602	-0.244055	0.497163	-0.2214	0.361003
PAQR3	PAQR3	grey	grey	0.0750964	0.014218	0.0240939	-0.00792098	-0.0181828	0.0633476	-0.00274909	0.0279667
RASGEF1B	RASGEF1B	blue	blue	-0.168994	-0.24877	0.148024	-0.227972	-0.447741	-0.229291	-0.370347	-0.0593399
HNRNPD	HNRNPD	grey	grey	0.0400571	-0.01536	-0.0114764	0.0387529	0.0426714	0.108862	0.0643709	0.082469
HNRNPDL	HNRNPDL	grey	grey	0.038146	-0.0801463	0.0410051	0.00164732	-0.0640462	0.0846321	-0.0432448	0.100334
ENOPH1	ENOPH1	grey	grey	0.00752593	-0.0407028	0.0172902	0.0274137	-0.0104876	0.0309067	-0.00959581	0.044641
TMEM150C	TMEM150C	blue	blue	0.0312328	0.0484734	0.118533	0.0593907	0.0128508	-0.0240621	0.0263256	0.0382573
SEC31A	SEC31A	turquoise	turquoise	0.0270837	-0.085283	-0.00831502	-0.0258759	-0.0315099	0.16773	-0.0148983	0.148191
LIN54	LIN54	turquoise	turquoise	0.0358484	-0.0380316	0.0066429	-0.0312784	-0.035544	0.090756	-0.0105686	0.0747595
COPS4	COPS4	grey	grey	0.0804213	0.0948111	0.0191959	0.0882092	0.104055	0.0140271	0.102241	-0.0226383
COQ2	COQ2	green	green	0.0665512	0.107363	0.00881961	0.0702289	0.104681	0.0334146	0.12974	0.0101798
HELQ	HELQ	grey	grey	0.0177659	-0.0231422	0.0433252	-0.035524	-0.0359927	0.0950662	-0.0112087	0.127731
MRPS18C	MRPS18C	green	green	0.0416995	0.0932928	0.0196093	0.11084	0.136625	-0.00257222	0.147898	-0.00884124
CDS1	CDS1	grey	grey	0.172481	0.166434	0.085921	0.0605826	0.0478236	0.0230519	0.0720865	-0.0224752
WDFY3	WDFY3	turquoise	turquoise	0.135902	-0.116816	0.0123346	-0.137437	-0.149209	0.353653	-0.0879016	0.296131
ARHGAP24	ARHGAP24	turquoise	turquoise	-0.212608	-0.572079	-0.256881	-0.321099	-0.336448	0.487351	-0.347538	0.499656
MAPK10	MAPK10	blue	blue	0.0970625	0.103495	0.401496	0.0891624	-0.0344127	-0.091102	0.0236915	0.0976086
PTPN13	PTPN13	grey	grey	0.0123276	-0.0953993	0.0604148	-0.0457066	-0.0799514	0.0837815	-0.0461407	0.129494
AFF1	AFF1	turquoise	turquoise	-0.0426632	-0.33006	-0.14277	-0.169645	-0.181224	0.384755	-0.178362	0.346166
KLHL8	KLHL8	grey	grey	0.01779	-0.0544989	0.0205643	-0.0118331	-0.0298838	0.112449	-0.0153222	0.137623
HSD17B11	HSD17B11	turquoise	turquoise	0.0492649	0.00292291	-0.052179	-0.0146431	0.0103363	0.114744	0.0165333	0.0720085
NUDT9	NUDT9	green	green	0.0255423	0.00680122	-0.00563424	0.0562812	0.0642781	0.0528759	0.0652136	0.0354951
SPARCL1	SPARCL1	brown	brown	-0.0874277	-0.162071	0.0319613	0.22496	0.0980069	-0.00988098	0.0246761	0.0591835
SPP1	SPP1	red	red	-0.250761	-0.439541	-0.207693	-0.286506	-0.232793	0.32684	-0.201548	0.330667
PKD2	PKD2	turquoise	turquoise	0.00906214	-0.199209	-0.0248684	-0.13552	-0.12789	0.304517	-0.0868223	0.300651
ABCG2	ABCG2	turquoise	turquoise	0.117546	0.138515	-0.0368699	0.0652816	0.10031	0.0201706	0.122962	-0.0562994
PPM1K	PPM1K	grey	grey	-0.00948282	-0.138833	0.0410536	0.0288507	-0.0485752	0.0792777	-0.0470508	0.112046
HERC6	HERC6	grey	grey	0.137952	0.138323	0.0736417	0.0118327	0.0210914	0.0433453	0.055231	0.0123817
HERC3	HERC3	blue	blue	0.185214	0.342286	0.273701	0.130845	0.11275	-0.0889444	0.181553	-0.0136892
NAP1L5	NAP1L5	brown	brown	0.0606107	0.215262	0.0503923	0.276108	0.266878	-0.121509	0.243911	-0.128646
FAM13A	FAM13A	red	red	-0.0582738	-0.258847	-0.0285925	-0.112435	-0.136154	0.276113	-0.133014	0.339496
GPRIN3	GPRIN3	red	red	-0.0744434	-0.236665	-0.0628791	-0.128138	-0.122132	0.283559	-0.0910986	0.327177
SNCA	SNCA	brown	brown	0.01446	0.0132379	0.0895277	0.169026	0.103745	0.0228403	0.100953	0.0844989
CCSER1	CCSER1	blue	blue	0.149842	0.18806	0.519153	0.0193595	-0.111266	-0.149615	-0.017792	0.0805603
GRID2	GRID2	blue	blue	0.0595923	-0.0579667	0.33379	-0.0510487	-0.198582	0.0327433	-0.152464	0.247972
SMARCAD1	SMARCAD1	yellow	yellow	0.143799	0.0448451	0.0950249	-0.0216024	-0.0510624	0.0911898	-0.00813185	0.0868466
HPGDS	HPGDS	turquoise	turquoise	0.441722	0.297352	-0.138037	-0.0359856	0.0430363	0.201823	0.0724911	-0.125272
PDLIM5	PDLIM5	turquoise	turquoise	0.110839	-0.0277843	-0.0508106	-0.0549321	-0.0397926	0.164807	-0.00579799	0.0675503
BMPR1B	BMPR1B	blue	blue	0.0933325	0.0546823	0.153651	0.000561258	-0.0253301	0.0122749	0.022843	0.0633724
UNC5C	UNC5C	blue	blue	0.112664	0.0357645	0.251289	-0.0506339	-0.096583	0.0509181	-0.0126867	0.162237
RAP1GDS1	RAP1GDS1	turquoise	turquoise	0.366608	0.266853	0.0399015	0.00473391	0.0298201	0.160508	0.088267	-0.0209529
TSPAN5	TSPAN5	blue	blue	0.205647	0.303552	0.336405	0.120894	0.0758841	-0.0486969	0.164977	0.0553736
EIF4E	EIF4E	grey	grey	0.054795	0.0230847	0.058302	0.0528454	0.0378146	0.069286	0.0516095	0.0705307
METAP1	METAP1	grey	grey	0.0474785	0.00842539	0.0103275	0.0054269	0.00706156	0.0824042	0.00909871	0.0667964
ADH5	ADH5	grey	grey	0.00884808	0.0310182	0.0132232	0.074562	0.0591475	-0.0238373	0.0617909	-0.0218655
MTTP	MTTP	grey	grey	0.187058	0.238807	0.113506	0.037189	0.050081	-0.00127018	0.0985186	-0.0295136
DAPP1	DAPP1	turquoise	turquoise	0.320351	0.219819	-0.122321	-0.035871	0.0266597	0.141429	0.0577755	-0.129728
LAMTOR3	LAMTOR3	grey	grey	0.0337114	0.0708681	0.0384427	0.110179	0.091973	-0.0391174	0.0890322	-0.030617
DNAJB14	DNAJB14	grey	grey	0.0200942	-0.071216	0.0140459	0.039701	-0.00635334	0.084657	-0.00803	0.0827345
PPP3CA	PPP3CA	brown	brown	0.246199	0.242135	0.22249	0.216018	0.0965151	-0.0420435	0.121783	-0.0443251
BANK1	BANK1	turquoise	turquoise	0.380036	0.26665	-0.113588	-0.0302298	0.0255384	0.121866	0.054744	-0.1806
NFKB1	NFKB1	turquoise	turquoise	0.176531	0.00124923	-0.091188	-0.113069	-0.0540364	0.285205	0.0235605	0.10926
MANBA	MANBA	turquoise	turquoise	-0.0785078	-0.321253	-0.136385	-0.195523	-0.179901	0.369831	-0.159135	0.354009
UBE2D3	UBE2D3	turquoise	turquoise	0.0317969	-0.136839	-0.0471983	-0.0325219	-0.0297184	0.259293	0.00837963	0.206028
CISD2	CISD2	green	green	0.120975	0.164295	0.0651568	0.0894701	0.0991422	-0.00106	0.149391	-0.0259599
CXXC4	CXXC4	grey	grey	0.0975078	0.153173	0.145653	0.0998274	0.0632021	-0.0306747	0.0955832	0.00573614
TET2	TET2	turquoise	turquoise	0.0108104	-0.196359	-0.0829858	-0.157399	-0.136685	0.333361	-0.108435	0.289073
PPA2	PPA2	red	red	-0.018925	-0.121375	0.0141247	-0.0253853	-0.0388765	0.133093	-0.0477365	0.169553
GSTCD	GSTCD	grey	grey	0.0633475	-0.0119385	0.0175187	-0.0508987	-0.0582184	0.0929441	-0.0404404	0.0798268
TBCK	TBCK	yellow	yellow	0.0770771	-0.104888	0.036958	-0.10485	-0.138198	0.186697	-0.0990051	0.185213
AIMP1	AIMP1	grey	grey	0.0934738	0.202253	0.0500334	0.146228	0.19069	-0.0397835	0.187684	-0.0589452
PAPSS1	PAPSS1	grey	grey	0.0550081	-0.0161518	0.056576	0.00747253	-0.0352688	0.0333851	-0.0154032	0.0347343
OSTC	OSTC	green	green	0.0714878	0.138783	0.0319885	0.0909293	0.128664	-0.0107454	0.164402	-0.030442
COL25A1	COL25A1	blue	blue	0.102686	0.115761	0.1757	0.0195662	-0.0130244	0.0029647	0.0280996	0.0589197
SEC24B	SEC24B	turquoise	turquoise	0.101638	0.00450324	0.0526127	-0.0751048	-0.0754691	0.191913	-0.0158572	0.177708
ELOVL6	ELOVL6	grey	grey	0.079319	0.0670427	0.154468	0.0161088	-0.0117801	0.0425632	0.0320025	0.104152
AP1AR	AP1AR	grey	grey	0.104102	0.129807	0.094282	0.0789089	0.0531989	-0.00606907	0.0766815	-0.00163376
TIFA	TIFA	turquoise	turquoise	0.16671	0.191865	0.0632936	0.0224368	0.0437896	0.0256999	0.0898507	-0.0204804
ALPK1	ALPK1	turquoise	turquoise	-0.0690435	-0.233138	-0.136717	-0.150904	-0.124444	0.302068	-0.126264	0.28902
LARP7	LARP7	red	red	-0.0174911	-0.0665819	-0.0274163	-0.00403934	-0.000600899	0.089376	-0.019382	0.0949886
ANK2	ANK2	blue	blue	0.300425	0.285811	0.400848	0.0863455	-0.0120883	-0.0413822	0.0855669	0.0412241
CAMK2D	CAMK2D	turquoise	turquoise	0.193925	-0.0176073	-0.0457215	-0.106413	-0.0974495	0.292658	-0.0485398	0.152685
UGT8	UGT8	grey	grey	0.096372	-0.00507287	0.020743	-0.0576224	-0.0423057	0.0978915	0.0077882	0.076501
NDST3	NDST3	blue	blue	0.094249	0.140308	0.322729	0.0520778	-0.028381	-0.097174	0.0193791	0.0437235
[truncated: 5,526 more rows]

## Sheet: Microglia_modules_hubs
	gene_name	module	kME
1	TANC2	yellow	0.585995
2	CSMD3	yellow	0.505423
3	LYSMD4	yellow	0.498417
4	PLCL1	yellow	0.468796
5	FGF14	blue	0.608891
6	CSMD1	blue	0.604239
7	NRG3	blue	0.592781
8	OPCML	blue	0.580061
9	CALM1	brown	0.58102
10	NRGN	brown	0.504659
11	CKB	brown	0.483559
12	STMN1	brown	0.478557
13	UBB	black	0.661144
14	FTH1	black	0.597105
15	CALM2	black	0.594657
16	HSPA8	black	0.592874
17	DOCK4	turquoise	0.580408
18	PLXDC2	turquoise	0.57853
19	DOCK8	turquoise	0.567054
20	SRGAP2	turquoise	0.556781
21	OAZ1	green	0.478755
22	NDUFA13	green	0.4544
23	COX5A	green	0.450644
24	TPT1	green	0.423058
25	KCNQ3	red	0.581108
26	ST6GALNAC3	red	0.574797
27	ADAM28	red	0.571823
28	SH3RF3	red	0.562766

## Sheet: Microglia_modules_enrichr
Column1	Term	Overlap	P.value	Adjusted.P.value	Old.P.value	Old.Adjusted.P.value	Odds.Ratio	Combined.Score	Genes	db	module
1	vascular transport (GO:0010232)	6/84	3.9831e-06	0.00229648	0	0	16.2209	201.682	ABCC3;SLC24A3;ATP8A1;SLC7A8;ABCC5;SLC16A7	GO_Biological_Process_2021	yellow
2	transport across blood-brain barrier (GO:0150104)	6/86	4.57012e-06	0.00229648	0	0	15.8138	194.446	ABCC3;SLC24A3;ATP8A1;SLC7A8;ABCC5;SLC16A7	GO_Biological_Process_2021	yellow
3	protein localization to membrane (GO:0072657)	7/195	5.60079e-05	0.0147548	0	0	7.89202	77.263	CACNB2;ROCK2;KCNIP3;LRRC4;FGF13;RAPGEF6;CLASP2	GO_Biological_Process_2021	yellow
4	protein localization to plasma membrane (GO:0072659)	6/136	6.24841e-05	0.0147548	0	0	9.70704	93.9699	CACNB2;ROCK2;KCNIP3;FGF13;RAPGEF6;CLASP2	GO_Biological_Process_2021	yellow
5	protein localization to cell periphery (GO:1990778)	6/140	7.34072e-05	0.0147548	0	0	9.41537	89.6295	CACNB2;ROCK2;KCNIP3;FGF13;RAPGEF6;CLASP2	GO_Biological_Process_2021	yellow
6	negative regulation of collateral sprouting (GO:0048671)	2/5	0.000245087	0.0325216	0	0	135.354	1125.32	ULK2;FGF13	GO_Biological_Process_2021	yellow
7	negative regulation of cell junction assembly (GO:1901889)	3/25	0.000257515	0.0325216	0	0	27.9447	230.947	ROCK2;PTEN;CLASP2	GO_Biological_Process_2021	yellow
8	anion transmembrane transport (GO:0098656)	4/67	0.000354195	0.0325216	0	0	13.1197	104.245	SLC7A8;ABCC5;SLC16A7;LRRC8D	GO_Biological_Process_2021	yellow
9	negative regulation of axonogenesis (GO:0050771)	3/28	0.000362821	0.0325216	0	0	24.5876	194.773	PTEN;ULK2;FGF13	GO_Biological_Process_2021	yellow
10	aminophospholipid transport (GO:0015917)	2/6	0.000366432	0.0325216	0	0	101.51	803.118	ATP8A2;ATP8A1	GO_Biological_Process_2021	yellow
11	regulation of peptidyl-cysteine S-nitrosylation (GO:2000169)	2/6	0.000366432	0.0325216	0	0	101.51	803.118	NOS1AP;SNTA1	GO_Biological_Process_2021	yellow
12	synapse organization (GO:0050808)	5/126	0.000427773	0.0325216	0	0	8.60331	66.7351	CACNB2;LRRC4;PTEN;ARHGAP39;GPHN	GO_Biological_Process_2021	yellow
13	microtubule polymerization (GO:0046785)	3/30	0.000446403	0.0325216	0	0	22.764	175.608	TUBGCP5;FGF13;CLASP2	GO_Biological_Process_2021	yellow
14	cyclic nucleotide transport (GO:0070729)	2/7	0.000511333	0.0325216	0	0	81.2041	615.404	ABCC5;LRRC8D	GO_Biological_Process_2021	yellow
15	positive regulation of B cell receptor signaling pathway (GO:0050861)	2/7	0.000511333	0.0325216	0	0	81.2041	615.404	PRKCB;FOXP1	GO_Biological_Process_2021	yellow
16	negative regulation of developmental growth (GO:0048640)	3/32	0.000541421	0.0325216	0	0	21.192	159.391	PTEN;ULK2;FGF13	GO_Biological_Process_2021	yellow
17	regulation of collateral sprouting (GO:0048670)	2/8	0.000679555	0.0325216	0	0	67.6667	493.566	ULK2;FGF13	GO_Biological_Process_2021	yellow
18	regulation of nitric oxide metabolic process (GO:0080164)	2/8	0.000679555	0.0325216	0	0	67.6667	493.566	NOS1AP;SIRPA	GO_Biological_Process_2021	yellow
19	excitatory synapse assembly (GO:1904861)	2/8	0.000679555	0.0325216	0	0	67.6667	493.566	LRRC4;PTEN	GO_Biological_Process_2021	yellow
20	regulation of wound healing, spreading of epidermal cells (GO:1903689)	2/8	0.000679555	0.0325216	0	0	67.6667	493.566	PTEN;CLASP2	GO_Biological_Process_2021	yellow
21	postsynaptic density organization (GO:0097106)	2/8	0.000679555	0.0325216	0	0	67.6667	493.566	LRRC4;PTEN	GO_Biological_Process_2021	yellow
22	negative regulation of protein modification process (GO:0031400)	4/81	0.000728845	0.033295	0	0	10.7267	77.4904	PTEN;SIRPA;TARDBP;SNTA1	GO_Biological_Process_2021	yellow
23	negative regulation of nitric oxide biosynthetic process (GO:0045019)	2/9	0.000870867	0.0350089	0	0	57.9971	408.649	ROCK2;SIRPA	GO_Biological_Process_2021	yellow
24	negative regulation of nitric oxide metabolic process (GO:1904406)	2/9	0.000870867	0.0350089	0	0	57.9971	408.649	ROCK2;SIRPA	GO_Biological_Process_2021	yellow
25	regulation of tumor necrosis factor superfamily cytokine production (GO:1903555)	2/9	0.000870867	0.0350089	0	0	57.9971	408.649	SIRPA;FOXP1	GO_Biological_Process_2021	yellow
26	regulation of nitric oxide biosynthetic process (GO:0045428)	3/40	0.0010477	0.0390331	0	0	16.6032	113.917	ROCK2;NOS1AP;SIRPA	GO_Biological_Process_2021	yellow
27	regulation of high voltage-gated calcium channel activity (GO:1901841)	2/10	0.00108504	0.0390331	0	0	50.7449	346.392	CACNB2;NOS1AP	GO_Biological_Process_2021	yellow
28	peptidyl-serine phosphorylation (GO:0018105)	5/156	0.00112363	0.0390331	0	0	6.88358	46.7477	PRKCB;TNKS;ROCK2;ULK2;CAMK1	GO_Biological_Process_2021	yellow
29	carboxylic acid transmembrane transport (GO:1905039)	3/41	0.00112633	0.0390331	0	0	16.1655	109.744	SLC7A8;ABCC5;SLC16A7	GO_Biological_Process_2021	yellow
30	regulation of calcium ion transmembrane transport via high voltage-gated calcium channel (GO:1902514)	2/11	0.00132184	0.0428532	0	0	45.1043	298.984	CACNB2;NOS1AP	GO_Biological_Process_2021	yellow
31	establishment of endothelial intestinal barrier (GO:0090557)	2/11	0.00132184	0.0428532	0	0	45.1043	298.984	TJP1;RAPGEF6	GO_Biological_Process_2021	yellow
32	regulation of neuron projection development (GO:0010975)	5/165	0.00144097	0.0452555	0	0	6.49342	42.4828	RTN4RL1;PTEN;CSMD3;CAMK1;TANC2	GO_Biological_Process_2021	yellow
33	regulation of B cell apoptotic process (GO:0002902)	2/12	0.00158105	0.0473357	0	0	40.5918	261.804	FNIP1;FOXP1	GO_Biological_Process_2021	yellow
34	peptidyl-serine modification (GO:0018209)	5/169	0.00160141	0.0473357	0	0	6.33376	40.7696	PRKCB;TNKS;ROCK2;ULK2;CAMK1	GO_Biological_Process_2021	yellow
35	negative regulation of transport (GO:0051051)	3/51	0.0021223	0.0581195	0	0	12.7912	78.7333	MCTP1;PTEN;SIRPA	GO_Biological_Process_2021	yellow
36	nuclear membrane disassembly (GO:0051081)	2/14	0.00216577	0.0581195	0	0	33.8231	207.504	PRKCB;AKAP8L	GO_Biological_Process_2021	yellow
37	lipid transport (GO:0006869)	4/109	0.00219091	0.0581195	0	0	7.85516	48.1006	ABCC3;ATP8A1;ABCA9;PITPNC1	GO_Biological_Process_2021	yellow
38	regulation of protein phosphorylation (GO:0001932)	6/266	0.00219755	0.0581195	0	0	4.8216	29.5102	ROCK2;AKAP8L;PTEN;SIRPA;FNIP1;TARDBP	GO_Biological_Process_2021	yellow
39	regulation of focal adhesion assembly (GO:0051893)	3/54	0.00250059	0.0628274	0	0	12.037	72.1163	ROCK2;PTEN;CLASP2	GO_Biological_Process_2021	yellow
40	regulation of potassium ion transmembrane transport (GO:1901379)	3/54	0.00250059	0.0628274	0	0	12.037	72.1163	GNG2;KCNIP3;NOS1AP	GO_Biological_Process_2021	yellow
41	Rho protein signal transduction (GO:0007266)	3/56	0.00277449	0.0648091	0	0	11.5816	68.1842	ROCK2;ARHGEF1;ARHGAP5	GO_Biological_Process_2021	yellow
42	negative regulation of cell-substrate junction organization (GO:0150118)	2/16	0.00283741	0.0648091	0	0	28.9883	170.013	PTEN;CLASP2	GO_Biological_Process_2021	yellow
43	negative regulation of focal adhesion assembly (GO:0051895)	2/16	0.00283741	0.0648091	0	0	28.9883	170.013	PTEN;CLASP2	GO_Biological_Process_2021	yellow
44	regulation of interleukin-1 production (GO:0032652)	2/16	0.00283741	0.0648091	0	0	28.9883	170.013	SIRPA;FOXP1	GO_Biological_Process_2021	yellow
45	negative regulation of macromolecule metabolic process (GO:0010605)	5/194	0.00291735	0.0651542	0	0	5.489	32.0397	TNRC6C;SLC24A3;ROCK2;TARDBP;FOXP1	GO_Biological_Process_2021	yellow
46	purine ribonucleotide transport (GO:0015868)	2/17	0.00320529	0.0688284	0	0	27.0544	155.372	ABCC5;LRRC8D	GO_Biological_Process_2021	yellow
47	phospholipid transport (GO:0015914)	3/59	0.00321884	0.0688284	0	0	10.9595	62.8936	ATP8A2;ATP8A1;PITPNC1	GO_Biological_Process_2021	yellow
48	adenine nucleotide transport (GO:0051503)	2/18	0.00359424	0.0737185	0	0	25.3622	142.749	ABCC5;LRRC8D	GO_Biological_Process_2021	yellow
49	regulation of ventricular cardiac muscle cell membrane repolarization (GO:0060307)	2/18	0.00359424	0.0737185	0	0	25.3622	142.749	NOS1AP;SNTA1	GO_Biological_Process_2021	yellow
50	regulation of bicellular tight junction assembly (GO:2000810)	2/19	0.00400405	0.0773859	0	0	23.8691	131.768	TJP1;ROCK2	GO_Biological_Process_2021	yellow
51	nuclear membrane organization (GO:0071763)	2/19	0.00400405	0.0773859	0	0	23.8691	131.768	AKAP8L;TARDBP	GO_Biological_Process_2021	yellow
52	postsynaptic membrane organization (GO:0001941)	2/19	0.00400405	0.0773859	0	0	23.8691	131.768	LRRC4;GPHN	GO_Biological_Process_2021	yellow
53	regulation of RNA metabolic process (GO:0051252)	3/65	0.00423252	0.0802582	0	0	9.89591	54.0807	CLK1;SNRNP70;HNRNPH1	GO_Biological_Process_2021	yellow
54	microtubule nucleation (GO:0007020)	2/20	0.0044345	0.0810304	0	0	22.542	122.14	TUBGCP5;CLASP2	GO_Biological_Process_2021	yellow
55	xenobiotic transport (GO:0042908)	2/20	0.0044345	0.0810304	0	0	22.542	122.14	ABCC3;ABCC5	GO_Biological_Process_2021	yellow
56	canonical Wnt signaling pathway (GO:0060070)	3/68	0.00480405	0.0832172	0	0	9.43775	50.3815	BCL9;PTEN;LRP5	GO_Biological_Process_2021	yellow
57	negative regulation of microtubule depolymerization (GO:0007026)	2/21	0.00488539	0.0832172	0	0	21.3545	113.638	FGF13;CLASP2	GO_Biological_Process_2021	yellow
58	regulation of dendritic spine development (GO:0060998)	2/21	0.00488539	0.0832172	0	0	21.3545	113.638	CAMK1;TANC2	GO_Biological_Process_2021	yellow
59	positive regulation of antigen receptor-mediated signaling pathway (GO:0050857)	2/21	0.00488539	0.0832172	0	0	21.3545	113.638	PRKCB;FOXP1	GO_Biological_Process_2021	yellow
60	synapse assembly (GO:0007416)	3/69	0.0050044	0.0838237	0	0	9.29428	49.2359	LRRC4;PTEN;FGF13	GO_Biological_Process_2021	yellow
61	regulation of cardiac muscle cell membrane repolarization (GO:0099623)	2/22	0.0053565	0.0868271	0	0	20.2857	106.083	NOS1AP;SNTA1	GO_Biological_Process_2021	yellow
62	regulation of voltage-gated calcium channel activity (GO:1901385)	2/22	0.0053565	0.0868271	0	0	20.2857	106.083	CACNB2;NOS1AP	GO_Biological_Process_2021	yellow
63	regulation of small GTPase mediated signal transduction (GO:0051056)	4/141	0.00550403	0.0878024	0	0	6.01064	31.269	ARHGAP39;ARHGEF1;ARHGAP5;MYO9A	GO_Biological_Process_2021	yellow
64	Ras protein signal transduction (GO:0007265)	4/142	0.00564221	0.0886003	0	0	5.96679	30.8929	ROCK2;ARHGEF1;ARHGAP5;RAPGEF6	GO_Biological_Process_2021	yellow
65	regulation of B cell receptor signaling pathway (GO:0050855)	2/23	0.00584762	0.0890433	0	0	19.3188	99.3316	PRKCB;FOXP1	GO_Biological_Process_2021	yellow
66	hyaluronan metabolic process (GO:0030212)	2/23	0.00584762	0.0890433	0	0	19.3188	99.3316	ABCC5;HEXA	GO_Biological_Process_2021	yellow
67	regulation of stress fiber assembly (GO:0051492)	3/74	0.00608144	0.0900048	0	0	8.63758	44.0734	TJP1;ROCK2;CLASP2	GO_Biological_Process_2021	yellow
68	negative regulation of protein depolymerization (GO:1901880)	2/24	0.00635855	0.0900048	0	0	18.4397	93.2672	FGF13;CLASP2	GO_Biological_Process_2021	yellow
69	negative regulation of stress fiber assembly (GO:0051497)	2/24	0.00635855	0.0900048	0	0	18.4397	93.2672	TJP1;CLASP2	GO_Biological_Process_2021	yellow
70	neuromuscular junction development (GO:0007528)	2/24	0.00635855	0.0900048	0	0	18.4397	93.2672	CACNB2;GPHN	GO_Biological_Process_2021	yellow
71	lipid translocation (GO:0034204)	2/24	0.00635855	0.0900048	0	0	18.4397	93.2672	ATP8A2;ATP8A1	GO_Biological_Process_2021	yellow
72	regulation of RNA splicing (GO:0043484)	3/76	0.006548	0.0913991	0	0	8.40008	42.2406	CLK1;SNRNP70;HNRNPH1	GO_Biological_Process_2021	yellow
73	regulation of cytokine production (GO:0001817)	4/150	0.00683178	0.0923136	0	0	5.63756	28.1098	CADM1;SIRPA;DTX4;FOXP1	GO_Biological_Process_2021	yellow
74	regulation of cardiac muscle cell action potential (GO:0098901)	2/25	0.00688907	0.0923136	0	0	17.6371	87.7942	NOS1AP;FGF13	GO_Biological_Process_2021	yellow
75	regulation of microtubule depolymerization (GO:0031114)	2/25	0.00688907	0.0923136	0	0	17.6371	87.7942	FGF13;CLASP2	GO_Biological_Process_2021	yellow
76	negative regulation of protein serine/threonine kinase activity (GO:0071901)	3/78	0.00703534	0.0930331	0	0	8.17526	40.5232	PTEN;LRP5;PKIG	GO_Biological_Process_2021	yellow
77	regulation of cell junction assembly (GO:1901888)	2/27	0.00800811	0.103181	0	0	16.2245	78.3205	TJP1;ROCK2	GO_Biological_Process_2021	yellow
78	negative regulation of actin filament bundle assembly (GO:0032232)	2/27	0.00800811	0.103181	0	0	16.2245	78.3205	TJP1;CLASP2	GO_Biological_Process_2021	yellow
79	spindle assembly (GO:0051225)	3/84	0.00862417	0.109713	0	0	7.56739	35.9692	TNKS;TUBGCP5;CLASP2	GO_Biological_Process_2021	yellow
80	negative regulation of phosphorylation (GO:0042326)	3/86	0.0091967	0.112794	0	0	7.3843	34.6243	PTEN;SIRPA;TARDBP	GO_Biological_Process_2021	yellow
81	negative regulation of wound healing (GO:0061045)	2/29	0.0092031	0.112794	0	0	15.0212	70.4224	PTEN;CLASP2	GO_Biological_Process_2021	yellow
82	establishment of endothelial barrier (GO:0061028)	2/29	0.0092031	0.112794	0	0	15.0212	70.4224	TJP1;RAPGEF6	GO_Biological_Process_2021	yellow
83	regulation of cation transmembrane transport (GO:1904062)	2/30	0.00982858	0.119009	0	0	14.484	66.9516	KCNIP3;SNTA1	GO_Biological_Process_2021	yellow
84	phospholipid translocation (GO:0045332)	2/31	0.0104725	0.125295	0	0	13.9838	63.7523	ATP8A2;ATP8A1	GO_Biological_Process_2021	yellow
85	Wnt signaling pathway (GO:0016055)	3/92	0.0110455	0.125733	0	0	6.8844	31.0193	BCL9;PTEN;LRP5	GO_Biological_Process_2021	yellow
86	negative regulation of cell-matrix adhesion (GO:0001953)	2/32	0.0111345	0.125733	0	0	13.517	60.7955	PTEN;CLASP2	GO_Biological_Process_2021	yellow
87	regulation of cellular biosynthetic process (GO:0031326)	2/32	0.0111345	0.125733	0	0	13.517	60.7955	NOS1AP;SIRPA	GO_Biological_Process_2021	yellow
88	negative regulation of microtubule polymerization or depolymerization (GO:0031111)	2/32	0.0111345	0.125733	0	0	13.517	60.7955	FGF13;CLASP2	GO_Biological_Process_2021	yellow
89	regulation of dendritic spine morphogenesis (GO:0061001)	2/32	0.0111345	0.125733	0	0	13.517	60.7955	PTEN;TANC2	GO_Biological_Process_2021	yellow
90	positive regulation of epithelial cell migration (GO:0010634)	3/94	0.0117059	0.13048	0	0	6.73241	29.9435	ROCK2;FOXP1;CLASP2	GO_Biological_Process_2021	yellow
91	keratan sulfate metabolic process (GO:0042339)	2/33	0.0118146	0.13048	0	0	13.0803	58.0559	HEXA;ST3GAL3	GO_Biological_Process_2021	yellow
92	RNA processing (GO:0006396)	4/179	0.0125026	0.135216	0	0	4.69643	20.5789	HNRNPH1;AKAP8L;TARDBP;RBM5	GO_Biological_Process_2021	yellow
93	protein localization to chromosome (GO:0034502)	2/34	0.0125125	0.135216	0	0	12.6709	55.5117	TNKS;IFFO1	GO_Biological_Process_2021	yellow
94	glycosaminoglycan biosynthetic process (GO:0006024)	3/97	0.0127385	0.136194	0	0	6.51656	28.4326	ABCC5;HEXA;ST3GAL3	GO_Biological_Process_2021	yellow
95	regulation of peptidyl-serine phosphorylation (GO:0033135)	3/98	0.013094	0.13852	0	0	6.44764	27.9544	PTEN;CAMK1;FNIP1	GO_Biological_Process_2021	yellow
96	organic acid transport (GO:0015849)	3/100	0.0138218	0.143171	0	0	6.31406	27.0337	ABCC3;SLC7A8;LRRC8D	GO_Biological_Process_2021	yellow
97	regulation of microtubule-based process (GO:0032886)	2/36	0.0139609	0.143171	0	0	11.9244	50.9349	MEMO1;CLASP2	GO_Biological_Process_2021	yellow
98	Wnt signaling pathway, calcium modulating pathway (GO:0007223)	2/36	0.0139609	0.143171	0	0	11.9244	50.9349	TNRC6C;GNG2	GO_Biological_Process_2021	yellow
99	cell junction assembly (GO:0034329)	3/102	0.0145722	0.14793	0	0	6.18588	26.1579	TJP1;PTEN;MYO9A	GO_Biological_Process_2021	yellow
100	positive regulation of potassium ion transport (GO:0043268)	2/38	0.0154783	0.154017	0	0	11.2608	46.9384	GNG2;NOS1AP	GO_Biological_Process_2021	yellow
101	mRNA destabilization (GO:0061157)	2/38	0.0154783	0.154017	0	0	11.2608	46.9384	ROCK2;TARDBP	GO_Biological_Process_2021	yellow
102	regulation of cellular component biogenesis (GO:0044087)	2/39	0.0162624	0.158677	0	0	10.9559	45.1261	TJP1;ROCK2	GO_Biological_Process_2021	yellow
103	cellular response to ketone (GO:1901655)	2/39	0.0162624	0.158677	0	0	10.9559	45.1261	GNG2;ROCK2	GO_Biological_Process_2021	yellow
104	modulation of chemical synaptic transmission (GO:0050804)	3/109	0.0173781	0.159708	0	0	5.77534	23.4048	MCTP1;LRRC4;PTEN	GO_Biological_Process_2021	yellow
105	mRNA processing (GO:0006397)	5/300	0.017408	0.159708	0	0	3.49777	14.1689	SRRM2;SNRNP70;HNRNPH1;AKAP8L;RBM5	GO_Biological_Process_2021	yellow
106	positive regulation of cation transmembrane transport (GO:1904064)	2/41	0.0178805	0.159708	0	0	10.393	41.8219	GNG2;NOS1AP	GO_Biological_Process_2021	yellow
107	import into cell (GO:0098657)	2/41	0.0178805	0.159708	0	0	10.393	41.8219	SLC7A8;LRRC8D	GO_Biological_Process_2021	yellow
108	regulation of macromolecule metabolic process (GO:0060255)	4/200	0.0180733	0.159708	0	0	4.18878	16.8109	ROCK2;SIRPA;TARDBP;FOXP1	GO_Biological_Process_2021	yellow
109	positive regulation of mRNA catabolic process (GO:0061014)	2/44	0.0204295	0.159708	0	0	9.64917	37.5428	TNRC6C;ROCK2	GO_Biological_Process_2021	yellow
110	positive regulation of potassium ion transmembrane transport (GO:1901381)	2/44	0.0204295	0.159708	0	0	9.64917	37.5428	GNG2;NOS1AP	GO_Biological_Process_2021	yellow
111	amino acid transmembrane transport (GO:0003333)	2/45	0.021311	0.159708	0	0	9.4243	36.2697	SLC7A8;LRRC8D	GO_Biological_Process_2021	yellow
112	negative regulation of response to external stimulus (GO:0032102)	3/118	0.0213987	0.159708	0	0	5.32093	20.4559	RTN4RL1;PTEN;SIRPA	GO_Biological_Process_2021	yellow
113	spliceosomal complex assembly (GO:0000245)	2/46	0.022208	0.159708	0	0	9.20965	35.0639	RBM5;LUC7L2	GO_Biological_Process_2021	yellow
114	positive regulation of protein modification process (GO:0031401)	4/214	0.0225261	0.159708	0	0	3.90675	14.8186	ROCK2;NOS1AP;CAMK1;FNIP1	GO_Biological_Process_2021	yellow
115	negative regulation of gene expression (GO:0010629)	5/322	0.0228325	0.159708	0	0	3.25137	12.2888	TNRC6C;SLC24A3;ROCK2;TARDBP;FOXP1	GO_Biological_Process_2021	yellow
116	polyol metabolic process (GO:0019751)	2/47	0.0231206	0.159708	0	0	9.00454	33.9204	INPP4B;PTEN	GO_Biological_Process_2021	yellow
117	positive regulation of cell-cell adhesion (GO:0022409)	2/47	0.0231206	0.159708	0	0	9.00454	33.9204	MAGI1;TJP1	GO_Biological_Process_2021	yellow
118	inositol phosphate metabolic process (GO:0043647)	2/48	0.0240483	0.159708	0	0	8.80834	32.8348	INPP4B;PTEN	GO_Biological_Process_2021	yellow
119	protein localization to site of double-strand break (GO:1990166)	1/5	0.0247535	0.159708	0	0	50.2424	185.836	IFFO1	GO_Biological_Process_2021	yellow
120	regulation of basement membrane assembly involved in embryonic body morphogenesis (GO:1904259)	1/5	0.0247535	0.159708	0	0	50.2424	185.836	CLASP2	GO_Biological_Process_2021	yellow
121	bone marrow development (GO:0048539)	1/5	0.0247535	0.159708	0	0	50.2424	185.836	LRP5	GO_Biological_Process_2021	yellow
122	negative regulation of myosin-light-chain-phosphatase activity (GO:0035509)	1/5	0.0247535	0.159708	0	0	50.2424	185.836	ROCK2	GO_Biological_Process_2021	yellow
123	negative regulation of organ growth (GO:0046621)	1/5	0.0247535	0.159708	0	0	50.2424	185.836	PTEN	GO_Biological_Process_2021	yellow
124	regulation of endothelial tube morphogenesis (GO:1901509)	1/5	0.0247535	0.159708	0	0	50.2424	185.836	FOXP1	GO_Biological_Process_2021	yellow
125	cellular response to testosterone stimulus (GO:0071394)	1/5	0.0247535	0.159708	0	0	50.2424	185.836	ROCK2	GO_Biological_Process_2021	yellow
126	cyclic-GMP-AMP transmembrane import across plasma membrane (GO:0140361)	1/5	0.0247535	0.159708	0	0	50.2424	185.836	LRRC8D	GO_Biological_Process_2021	yellow
127	phenol-containing compound metabolic process (GO:0018958)	1/5	0.0247535	0.159708	0	0	50.2424	185.836	RNF180	GO_Biological_Process_2021	yellow
128	positive regulation of basement membrane assembly involved in embryonic body morphogenesis (GO:1904261)	1/5	0.0247535	0.159708	0	0	50.2424	185.836	CLASP2	GO_Biological_Process_2021	yellow
129	positive regulation of blood-brain barrier permeability (GO:1905605)	1/5	0.0247535	0.159708	0	0	50.2424	185.836	TJP1	GO_Biological_Process_2021	yellow
130	fatty acid derivative catabolic process (GO:1901569)	1/5	0.0247535	0.159708	0	0	50.2424	185.836	OXCT1	GO_Biological_Process_2021	yellow
131	regulation of synapse structural plasticity (GO:0051823)	1/5	0.0247535	0.159708	0	0	50.2424	185.836	CAMK1	GO_Biological_Process_2021	yellow
132	regulation of system process (GO:0044057)	1/5	0.0247535	0.159708	0	0	50.2424	185.836	ROCK2	GO_Biological_Process_2021	yellow
133	folate transmembrane transport (GO:0098838)	1/5	0.0247535	0.159708	0	0	50.2424	185.836	ABCC5	GO_Biological_Process_2021	yellow
134	glutathione transport (GO:0034635)	1/5	0.0247535	0.159708	0	0	50.2424	185.836	ABCC5	GO_Biological_Process_2021	yellow
135	regulation of voltage-gated sodium channel activity (GO:1905150)	1/5	0.0247535	0.159708	0	0	50.2424	185.836	FGF13	GO_Biological_Process_2021	yellow
136	response to acetylcholine (GO:1905144)	1/5	0.0247535	0.159708	0	0	50.2424	185.836	ROCK2	GO_Biological_Process_2021	yellow
137	histone-threonine phosphorylation (GO:0035405)	1/5	0.0247535	0.159708	0	0	50.2424	185.836	PRKCB	GO_Biological_Process_2021	yellow
138	immature B cell differentiation (GO:0002327)	1/5	0.0247535	0.159708	0	0	50.2424	185.836	FNIP1	GO_Biological_Process_2021	yellow
139	serotonin metabolic process (GO:0042428)	1/5	0.0247535	0.159708	0	0	50.2424	185.836	RNF180	GO_Biological_Process_2021	yellow
140	mammary gland duct morphogenesis (GO:0060603)	1/5	0.0247535	0.159708	0	0	50.2424	185.836	LRP5	GO_Biological_Process_2021	yellow
141	membrane depolarization during AV node cell action potential (GO:0086045)	1/5	0.0247535	0.159708	0	0	50.2424	185.836	CACNB2	GO_Biological_Process_2021	yellow
142	postsynaptic density protein 95 clustering (GO:0097119)	1/5	0.0247535	0.159708	0	0	50.2424	185.836	LRRC4	GO_Biological_Process_2021	yellow
143	modulation by symbiont of host autophagy (GO:0075071)	1/5	0.0247535	0.159708	0	0	50.2424	185.836	ULK2	GO_Biological_Process_2021	yellow
144	monocyte extravasation (GO:0035696)	1/5	0.0247535	0.159708	0	0	50.2424	185.836	SIRPA	GO_Biological_Process_2021	yellow
145	proline transmembrane transport (GO:0035524)	1/5	0.0247535	0.159708	0	0	50.2424	185.836	SLC7A8	GO_Biological_Process_2021	yellow
146	adherens junction organization (GO:0034332)	2/49	0.0249912	0.159708	0	0	8.6205	31.803	TJP1;CADM1	GO_Biological_Process_2021	yellow
147	negative regulation of cell projection organization (GO:0031345)	2/49	0.0249912	0.159708	0	0	8.6205	31.803	RTN4RL1;PTEN	GO_Biological_Process_2021	yellow
148	negative regulation of ERK1 and ERK2 cascade (GO:0070373)	2/50	0.025949	0.159708	0	0	8.44048	30.8214	PTEN;SIRPA	GO_Biological_Process_2021	yellow
149	regulation of cellular component movement (GO:0051270)	2/50	0.025949	0.159708	0	0	8.44048	30.8214	ROCK2;MEMO1	GO_Biological_Process_2021	yellow
150	regulation of axonogenesis (GO:0050770)	2/51	0.0269215	0.159708	0	0	8.26781	29.8867	PTEN;PLXNA4	GO_Biological_Process_2021	yellow
151	mesenchymal cell differentiation (GO:0048762)	2/51	0.0269215	0.159708	0	0	8.26781	29.8867	ROCK2;FBXL17	GO_Biological_Process_2021	yellow
152	muscle contraction (GO:0006936)	3/129	0.026947	0.159708	0	0	4.85371	17.5407	ASPH;ROCK2;SNTA1	GO_Biological_Process_2021	yellow
153	negative regulation of cellular biosynthetic process (GO:0031327)	2/52	0.0279086	0.159708	0	0	8.10204	28.9958	ROCK2;SIRPA	GO_Biological_Process_2021	yellow
154	regulation of cell motility (GO:2000145)	3/133	0.0291374	0.159708	0	0	4.70341	16.63	ROCK2;MEMO1;PLXNA4	GO_Biological_Process_2021	yellow
155	adherens junction maintenance (GO:0034334)	1/6	0.029631	0.159708	0	0	40.1919	141.433	TJP1	GO_Biological_Process_2021	yellow
156	negative regulation of cell size (GO:0045792)	1/6	0.029631	0.159708	0	0	40.1919	141.433	PTEN	GO_Biological_Process_2021	yellow
157	aromatic amino acid transport (GO:0015801)	1/6	0.029631	0.159708	0	0	40.1919	141.433	SLC7A8	GO_Biological_Process_2021	yellow
158	negative regulation of excitatory postsynaptic potential (GO:0090394)	1/6	0.029631	0.159708	0	0	40.1919	141.433	PTEN	GO_Biological_Process_2021	yellow
159	regulation of cellular response to hypoxia (GO:1900037)	1/6	0.029631	0.159708	0	0	40.1919	141.433	ROCK2	GO_Biological_Process_2021	yellow
160	cerebral cortex cell migration (GO:0021795)	1/6	0.029631	0.159708	0	0	40.1919	141.433	FGF13	GO_Biological_Process_2021	yellow
161	neurotransmitter-gated ion channel clustering (GO:0072578)	1/6	0.029631	0.159708	0	0	40.1919	141.433	GPHN	GO_Biological_Process_2021	yellow
162	nucleotide transport (GO:0006862)	1/6	0.029631	0.159708	0	0	40.1919	141.433	ABCC5	GO_Biological_Process_2021	yellow
163	regulation of mRNA export from nucleus (GO:0010793)	1/6	0.029631	0.159708	0	0	40.1919	141.433	AKAP8L	GO_Biological_Process_2021	yellow
164	detection of virus (GO:0009597)	1/6	0.029631	0.159708	0	0	40.1919	141.433	SERINC3	GO_Biological_Process_2021	yellow
165	regulation of nitric oxide mediated signal transduction (GO:0010749)	1/6	0.029631	0.159708	0	0	40.1919	141.433	NOS1AP	GO_Biological_Process_2021	yellow
166	regulation of pro-B cell differentiation (GO:2000973)	1/6	0.029631	0.159708	0	0	40.1919	141.433	FNIP1	GO_Biological_Process_2021	yellow
167	regulation of ribonucleoprotein complex localization (GO:2000197)	1/6	0.029631	0.159708	0	0	40.1919	141.433	AKAP8L	GO_Biological_Process_2021	yellow
168	gastrulation with mouth forming second (GO:0001702)	1/6	0.029631	0.159708	0	0	40.1919	141.433	LRP5	GO_Biological_Process_2021	yellow
169	positive regulation of extrinsic apoptotic signaling pathway via death domain receptors (GO:1902043)	1/6	0.029631	0.159708	0	0	40.1919	141.433	PTEN	GO_Biological_Process_2021	yellow
170	response to angiotensin (GO:1990776)	1/6	0.029631	0.159708	0	0	40.1919	141.433	ROCK2	GO_Biological_Process_2021	yellow
171	response to catecholamine (GO:0071869)	1/6	0.029631	0.159708	0	0	40.1919	141.433	GNG2	GO_Biological_Process_2021	yellow
172	guanine nucleotide transmembrane transport (GO:1903790)	1/6	0.029631	0.159708	0	0	40.1919	141.433	LRRC8D	GO_Biological_Process_2021	yellow
173	response to testosterone (GO:0033574)	1/6	0.029631	0.159708	0	0	40.1919	141.433	ROCK2	GO_Biological_Process_2021	yellow
174	L-serine biosynthetic process (GO:0006564)	1/6	0.029631	0.159708	0	0	40.1919	141.433	SERINC3	GO_Biological_Process_2021	yellow
175	leucine transport (GO:0015820)	1/6	0.029631	0.159708	0	0	40.1919	141.433	SLC7A8	GO_Biological_Process_2021	yellow
176	positive regulation of plasminogen activation (GO:0010756)	1/6	0.029631	0.159708	0	0	40.1919	141.433	PLGRKT	GO_Biological_Process_2021	yellow
177	telencephalon cell migration (GO:0022029)	1/6	0.029631	0.159708	0	0	40.1919	141.433	FGF13	GO_Biological_Process_2021	yellow
178	postsynaptic density assembly (GO:0097107)	1/6	0.029631	0.159708	0	0	40.1919	141.433	PTEN	GO_Biological_Process_2021	yellow
179	prepulse inhibition (GO:0060134)	1/6	0.029631	0.159708	0	0	40.1919	141.433	PTEN	GO_Biological_Process_2021	yellow
180	molybdopterin cofactor biosynthetic process (GO:0032324)	1/6	0.029631	0.159708	0	0	40.1919	141.433	GPHN	GO_Biological_Process_2021	yellow
181	multinuclear osteoclast differentiation (GO:0072674)	1/6	0.029631	0.159708	0	0	40.1919	141.433	SH3PXD2A	GO_Biological_Process_2021	yellow
182	cellular protein modification process (GO:0006464)	10/1025	0.0322293	0.159708	0	0	2.06732	7.10101	PRKCB;TNKS;STRADA;ROCK2;GOLM1;PTEN;PPM1H;DCAF8;CAMK1;ST3GAL3	GO_Biological_Process_2021	yellow
183	carboxylic acid transport (GO:0046942)	2/57	0.0330569	0.159708	0	0	7.36364	25.1065	SLC7A8;SLC16A7	GO_Biological_Process_2021	yellow
184	monocarboxylic acid transport (GO:0015718)	2/57	0.0330569	0.159708	0	0	7.36364	25.1065	ABCC3;SLC16A7	GO_Biological_Process_2021	yellow
185	negative regulation of neuron projection development (GO:0010977)	2/58	0.034128	0.159708	0	0	7.23178	24.4263	RTN4RL1;PTEN	GO_Biological_Process_2021	yellow
186	negative regulation of axon regeneration (GO:0048681)	1/7	0.0344842	0.159708	0	0	33.4916	112.775	RTN4RL1	GO_Biological_Process_2021	yellow
187	adenylate cyclase-activating dopamine receptor signaling pathway (GO:0007191)	1/7	0.0344842	0.159708	0	0	33.4916	112.775	GNG2	GO_Biological_Process_2021	yellow
188	negative regulation of cell cycle phase transition (GO:1901988)	1/7	0.0344842	0.159708	0	0	33.4916	112.775	PTEN	GO_Biological_Process_2021	yellow
189	negative regulation of dendritic spine development (GO:0061000)	1/7	0.0344842	0.159708	0	0	33.4916	112.775	PTEN	GO_Biological_Process_2021	yellow
190	aspartate transmembrane transport (GO:0015810)	1/7	0.0344842	0.159708	0	0	33.4916	112.775	LRRC8D	GO_Biological_Process_2021	yellow
191	AV node cell action potential (GO:0086016)	1/7	0.0344842	0.159708	0	0	33.4916	112.775	CACNB2	GO_Biological_Process_2021	yellow
192	regulation of blood-brain barrier permeability (GO:1905603)	1/7	0.0344842	0.159708	0	0	33.4916	112.775	TJP1	GO_Biological_Process_2021	yellow
193	cation homeostasis (GO:0055080)	1/7	0.0344842	0.159708	0	0	33.4916	112.775	SLC7A8	GO_Biological_Process_2021	yellow
194	regulation of defense response to bacterium (GO:1900424)	1/7	0.0344842	0.159708	0	0	33.4916	112.775	FOXP1	GO_Biological_Process_2021	yellow
195	cellular response to monoamine stimulus (GO:0071868)	1/7	0.0344842	0.159708	0	0	33.4916	112.775	GNG2	GO_Biological_Process_2021	yellow
196	cellular response to prostaglandin E stimulus (GO:0071380)	1/7	0.0344842	0.159708	0	0	33.4916	112.775	GNG2	GO_Biological_Process_2021	yellow
197	regulation of I-kappaB phosphorylation (GO:1903719)	1/7	0.0344842	0.159708	0	0	33.4916	112.775	SIRPA	GO_Biological_Process_2021	yellow
198	cleavage furrow formation (GO:0036089)	1/7	0.0344842	0.159708	0	0	33.4916	112.775	SPIRE1	GO_Biological_Process_2021	yellow
199	norepinephrine metabolic process (GO:0042415)	1/7	0.0344842	0.159708	0	0	33.4916	112.775	RNF180	GO_Biological_Process_2021	yellow
200	dense core granule cytoskeletal transport (GO:0099519)	1/7	0.0344842	0.159708	0	0	33.4916	112.775	TANC2	GO_Biological_Process_2021	yellow
201	regulation of morphogenesis of an epithelium (GO:1905330)	1/7	0.0344842	0.159708	0	0	33.4916	112.775	FOXP1	GO_Biological_Process_2021	yellow
202	regulation of myosin-light-chain-phosphatase activity (GO:0035507)	1/7	0.0344842	0.159708	0	0	33.4916	112.775	ROCK2	GO_Biological_Process_2021	yellow
203	parallel actin filament bundle assembly (GO:0030046)	1/7	0.0344842	0.159708	0	0	33.4916	112.775	SPIRE1	GO_Biological_Process_2021	yellow
204	piecemeal microautophagy of the nucleus (GO:0034727)	1/7	0.0344842	0.159708	0	0	33.4916	112.775	ULK2	GO_Biological_Process_2021	yellow
205	positive regulation by symbiont of host autophagy (GO:0075044)	1/7	0.0344842	0.159708	0	0	33.4916	112.775	ULK2	GO_Biological_Process_2021	yellow
206	positive regulation of aspartic-type endopeptidase activity involved in amyloid precursor protein catabolic process (GO:1902961)	1/7	0.0344842	0.159708	0	0	33.4916	112.775	ROCK2	GO_Biological_Process_2021	yellow
207	ganglioside catabolic process (GO:0006689)	1/7	0.0344842	0.159708	0	0	33.4916	112.775	HEXA	GO_Biological_Process_2021	yellow
208	heme transport (GO:0015886)	1/7	0.0344842	0.159708	0	0	33.4916	112.775	ABCC5	GO_Biological_Process_2021	yellow
209	hexose catabolic process (GO:0019320)	1/7	0.0344842	0.159708	0	0	33.4916	112.775	LRP5	GO_Biological_Process_2021	yellow
210	histone H3-K14 acetylation (GO:0044154)	1/7	0.0344842	0.159708	0	0	33.4916	112.775	PHF14	GO_Biological_Process_2021	yellow
211	hyaluronan biosynthetic process (GO:0030213)	1/7	0.0344842	0.159708	0	0	33.4916	112.775	ABCC5	GO_Biological_Process_2021	yellow
212	positive regulation of lymphocyte apoptotic process (GO:0070230)	1/7	0.0344842	0.159708	0	0	33.4916	112.775	FNIP1	GO_Biological_Process_2021	yellow
213	late nucleophagy (GO:0044805)	1/7	0.0344842	0.159708	0	0	33.4916	112.775	ULK2	GO_Biological_Process_2021	yellow
214	leukotriene transport (GO:0071716)	1/7	0.0344842	0.159708	0	0	33.4916	112.775	ABCC3	GO_Biological_Process_2021	yellow
215	lysosomal microautophagy (GO:0016237)	1/7	0.0344842	0.159708	0	0	33.4916	112.775	ULK2	GO_Biological_Process_2021	yellow
216	thyroid hormone transport (GO:0070327)	1/7	0.0344842	0.159708	0	0	33.4916	112.775	SLC7A8	GO_Biological_Process_2021	yellow
217	positive regulation of voltage-gated calcium channel activity (GO:1901387)	1/7	0.0344842	0.159708	0	0	33.4916	112.775	CACNB2	GO_Biological_Process_2021	yellow
218	protein polymerization (GO:0051258)	2/59	0.0352126	0.162333	0	0	7.10455	23.7743	SPIRE1;FGF13	GO_Biological_Process_2021	yellow
219	negative regulation of cell migration (GO:0030336)	3/144	0.0356326	0.163265	0	0	4.33406	14.4519	MCTP1;PTEN;CLASP2	GO_Biological_Process_2021	yellow
220	peptidyl-threonine phosphorylation (GO:0018107)	2/60	0.0363104	0.163265	0	0	6.9817	23.1489	ROCK2;TNKS	GO_Biological_Process_2021	yellow
221	RNA splicing, via transesterification reactions with bulged adenosine as nucleophile (GO:0000377)	4/251	0.0372959	0.163265	0	0	3.31528	10.9035	SRRM2;SNRNP70;HNRNPH1;RBM5	GO_Biological_Process_2021	yellow
222	regulation of DNA-templated transcription, initiation (GO:2000142)	2/61	0.0374213	0.163265	0	0	6.86302	22.5486	TNRC6C;PTEN	GO_Biological_Process_2021	yellow
223	protein phosphorylation (GO:0006468)	6/496	0.0382325	0.163265	0	0	2.52844	8.25301	PRKCB;TNKS;STRADA;ROCK2;ULK2;CAMK1	GO_Biological_Process_2021	yellow
224	negative regulation of B cell apoptotic process (GO:0002903)	1/8	0.0393135	0.163265	0	0	28.7056	92.8968	FOXP1	GO_Biological_Process_2021	yellow
225	negative regulation of cAMP-dependent protein kinase activity (GO:2000480)	1/8	0.0393135	0.163265	0	0	28.7056	92.8968	PKIG	GO_Biological_Process_2021	yellow
226	regulation of cardiac muscle cell action potential involved in regulation of contraction (GO:0098909)	1/8	0.0393135	0.163265	0	0	28.7056	92.8968	FGF13	GO_Biological_Process_2021	yellow
227	regulation of chaperone-mediated autophagy (GO:1904714)	1/8	0.0393135	0.163265	0	0	28.7056	92.8968	SNRNP70	GO_Biological_Process_2021	yellow
228	regulation of chemokine (C-C motif) ligand 5 production (GO:0071649)	1/8	0.0393135	0.163265	0	0	28.7056	92.8968	SIRPA	GO_Biological_Process_2021	yellow
229	negative regulation of neuron projection regeneration (GO:0070571)	1/8	0.0393135	0.163265	0	0	28.7056	92.8968	RTN4RL1	GO_Biological_Process_2021	yellow
230	neurotransmitter receptor diffusion trapping (GO:0099628)	1/8	0.0393135	0.163265	0	0	28.7056	92.8968	GPHN	GO_Biological_Process_2021	yellow
231	regulation of myeloid leukocyte differentiation (GO:0002761)	1/8	0.0393135	0.163265	0	0	28.7056	92.8968	FOXP1	GO_Biological_Process_2021	yellow
232	osteoblast development (GO:0002076)	1/8	0.0393135	0.163265	0	0	28.7056	92.8968	LRP5	GO_Biological_Process_2021	yellow
233	regulation of nitrogen compound metabolic process (GO:0051171)	1/8	0.0393135	0.163265	0	0	28.7056	92.8968	ROCK2	GO_Biological_Process_2021	yellow
234	regulation of protein localization to early endosome (GO:1902965)	1/8	0.0393135	0.163265	0	0	28.7056	92.8968	ROCK2	GO_Biological_Process_2021	yellow
235	positive regulation of aspartic-type peptidase activity (GO:1905247)	1/8	0.0393135	0.163265	0	0	28.7056	92.8968	ROCK2	GO_Biological_Process_2021	yellow
236	folic acid transport (GO:0015884)	1/8	0.0393135	0.163265	0	0	28.7056	92.8968	ABCC5	GO_Biological_Process_2021	yellow
237	positive regulation of extracellular matrix disassembly (GO:0090091)	1/8	0.0393135	0.163265	0	0	28.7056	92.8968	CLASP2	GO_Biological_Process_2021	yellow
238	positive regulation of protein localization to early endosome (GO:1902966)	1/8	0.0393135	0.163265	0	0	28.7056	92.8968	ROCK2	GO_Biological_Process_2021	yellow
239	positive regulation of protein localization to endosome (GO:1905668)	1/8	0.0393135	0.163265	0	0	28.7056	92.8968	ROCK2	GO_Biological_Process_2021	yellow
240	T cell mediated cytotoxicity (GO:0001913)	1/8	0.0393135	0.163265	0	0	28.7056	92.8968	CADM1	GO_Biological_Process_2021	yellow
241	postsynapse organization (GO:0099173)	1/8	0.0393135	0.163265	0	0	28.7056	92.8968	ARHGAP39	GO_Biological_Process_2021	yellow
242	postsynaptic neurotransmitter receptor diffusion trapping (GO:0098970)	1/8	0.0393135	0.163265	0	0	28.7056	92.8968	GPHN	GO_Biological_Process_2021	yellow
243	negative regulation of protein phosphorylation (GO:0001933)	3/152	0.0407863	0.168178	0	0	4.0997	13.1166	PTEN;SIRPA;TARDBP	GO_Biological_Process_2021	yellow
244	regulation of transcription initiation from RNA polymerase II promoter (GO:0060260)	2/64	0.0408313	0.168178	0	0	6.52995	20.8848	TNRC6C;PTEN	GO_Biological_Process_2021	yellow
245	regulation of gene expression (GO:0010468)	10/1079	0.0433158	0.172527	0	0	1.95728	6.14437	CLK1;TNRC6C;SLC24A3;SNRNP70;HNRNPH1;ROCK2;NOS1AP;SIRPA;TARDBP;FOXP1	GO_Biological_Process_2021	yellow
246	regulation of cell differentiation (GO:0045595)	3/156	0.0434971	0.172527	0	0	3.99171	12.5143	PRKCB;CAMK1;CLASP2	GO_Biological_Process_2021	yellow
247	negative regulation of biomineralization (GO:0110150)	1/9	0.0441188	0.172527	0	0	25.1162	78.3842	ROCK2	GO_Biological_Process_2021	yellow
248	regulation of aspartic-type endopeptidase activity involved in amyloid precursor protein catabolic process (GO:1902959)	1/9	0.0441188	0.172527	0	0	25.1162	78.3842	ROCK2	GO_Biological_Process_2021	yellow
249	axon regeneration (GO:0031103)	1/9	0.0441188	0.172527	0	0	25.1162	78.3842	RTN4RL1	GO_Biological_Process_2021	yellow
250	bone cell development (GO:0098751)	1/9	0.0441188	0.172527	0	0	25.1162	78.3842	FOXP1	GO_Biological_Process_2021	yellow
251	regulation of endothelial cell development (GO:1901550)	1/9	0.0441188	0.172527	0	0	25.1162	78.3842	ROCK2	GO_Biological_Process_2021	yellow
252	positive regulation of cell-cell adhesion mediated by cadherin (GO:2000049)	1/9	0.0441188	0.172527	0	0	25.1162	78.3842	TJP1	GO_Biological_Process_2021	yellow
253	positive regulation of extracellular matrix assembly (GO:1901203)	1/9	0.0441188	0.172527	0	0	25.1162	78.3842	CLASP2	GO_Biological_Process_2021	yellow
254	hormone transport (GO:0009914)	1/9	0.0441188	0.172527	0	0	25.1162	78.3842	SLC7A8	GO_Biological_Process_2021	yellow
255	icosanoid transport (GO:0071715)	1/9	0.0441188	0.172527	0	0	25.1162	78.3842	ABCC3	GO_Biological_Process_2021	yellow
256	semaphorin-plexin signaling pathway involved in axon guidance (GO:1902287)	1/9	0.0441188	0.172527	0	0	25.1162	78.3842	PLXNA4	GO_Biological_Process_2021	yellow
257	protein hexamerization (GO:0034214)	1/9	0.0441188	0.172527	0	0	25.1162	78.3842	LRRC8D	GO_Biological_Process_2021	yellow
258	peptidyl-threonine modification (GO:0018210)	2/67	0.0443538	0.172773	0	0	6.22763	19.4025	ROCK2;TNKS	GO_Biological_Process_2021	yellow
259	regulation of myeloid cell differentiation (GO:0045637)	2/68	0.0455523	0.174893	0	0	6.13296	18.9441	TNRC6C;PRKCB	GO_Biological_Process_2021	yellow
260	mRNA splicing, via spliceosome (GO:0000398)	4/274	0.0487319	0.174893	0	0	3.02932	9.15286	SRRM2;SNRNP70;HNRNPH1;RBM5	GO_Biological_Process_2021	yellow
261	protein poly-ADP-ribosylation (GO:0070212)	1/10	0.0489004	0.174893	0	0	22.3244	67.3742	TNKS	GO_Biological_Process_2021	yellow
262	negative regulation of interferon-beta production (GO:0032688)	1/10	0.0489004	0.174893	0	0	22.3244	67.3742	SIRPA	GO_Biological_Process_2021	yellow
263	negative regulation of lymphocyte apoptotic process (GO:0070229)	1/10	0.0489004	0.174893	0	0	22.3244	67.3742	FOXP1	GO_Biological_Process_2021	yellow
264	negative regulation of phosphatidylinositol 3-kinase signaling (GO:0014067)	1/10	0.0489004	0.174893	0	0	22.3244	67.3742	PTEN	GO_Biological_Process_2021	yellow
265	cellular response to acetylcholine (GO:1905145)	1/10	0.0489004	0.174893	0	0	22.3244	67.3742	ROCK2	GO_Biological_Process_2021	yellow
266	cellular response to prostaglandin stimulus (GO:0071379)	1/10	0.0489004	0.174893	0	0	22.3244	67.3742	GNG2	GO_Biological_Process_2021	yellow
267	negative regulation of transmembrane transport (GO:0034763)	1/10	0.0489004	0.174893	0	0	22.3244	67.3742	PRKCB	GO_Biological_Process_2021	yellow
268	regulation of histone phosphorylation (GO:0033127)	1/10	0.0489004	0.174893	0	0	22.3244	67.3742	AKAP8L	GO_Biological_Process_2021	yellow
269	neuron projection regeneration (GO:0031102)	1/10	0.0489004	0.174893	0	0	22.3244	67.3742	RTN4RL1	GO_Biological_Process_2021	yellow
270	regulation of organ growth (GO:0046620)	1/10	0.0489004	0.174893	0	0	22.3244	67.3742	PTEN	GO_Biological_Process_2021	yellow
271	glycine transport (GO:0015816)	1/10	0.0489004	0.174893	0	0	22.3244	67.3742	SLC7A8	GO_Biological_Process_2021	yellow
272	glycosphingolipid catabolic process (GO:0046479)	1/10	0.0489004	0.174893	0	0	22.3244	67.3742	HEXA	GO_Biological_Process_2021	yellow
273	positive regulation of mesenchymal cell proliferation (GO:0002053)	1/10	0.0489004	0.174893	0	0	22.3244	67.3742	LRP5	GO_Biological_Process_2021	yellow
274	iron ion transmembrane transport (GO:0034755)	1/10	0.0489004	0.174893	0	0	22.3244	67.3742	ABCC5	GO_Biological_Process_2021	yellow
275	L-serine metabolic process (GO:0006563)	1/10	0.0489004	0.174893	0	0	22.3244	67.3742	SERINC3	GO_Biological_Process_2021	yellow
276	lipoprotein transport (GO:0042953)	1/10	0.0489004	0.174893	0	0	22.3244	67.3742	PRKCB	GO_Biological_Process_2021	yellow
277	positive regulation of tissue remodeling (GO:0034105)	1/10	0.0489004	0.174893	0	0	22.3244	67.3742	ROCK2	GO_Biological_Process_2021	yellow
278	positive regulation of vascular endothelial growth factor receptor signaling pathway (GO:0030949)	1/10	0.0489004	0.174893	0	0	22.3244	67.3742	PRKCB	GO_Biological_Process_2021	yellow
279	presynaptic membrane assembly (GO:0097105)	1/10	0.0489004	0.174893	0	0	22.3244	67.3742	PTEN	GO_Biological_Process_2021	yellow
280	monocyte activation (GO:0042117)	1/10	0.0489004	0.174893	0	0	22.3244	67.3742	FOXP1	GO_Biological_Process_2021	yellow
281	myelin maintenance (GO:0043217)	1/10	0.0489004	0.174893	0	0	22.3244	67.3742	PTEN	GO_Biological_Process_2021	yellow
282	phosphatidylinositol-mediated signaling (GO:0048015)	2/71	0.0492185	0.175407	0	0	5.86542	17.6636	PLCL1;PTEN	GO_Biological_Process_2021	yellow
283	cell junction organization (GO:0034330)	2/72	0.0504638	0.177951	0	0	5.78134	17.266	TJP1;MYO9A	GO_Biological_Process_2021	yellow
284	negative regulation of supramolecular fiber organization (GO:1902904)	2/72	0.0504638	0.177951	0	0	5.78134	17.266	FGF13;CLASP2	GO_Biological_Process_2021	yellow
285	cytoskeleton-dependent cytokinesis (GO:0061640)	2/72	0.0504638	0.177951	0	0	5.78134	17.266	ROCK2;SPIRE1	GO_Biological_Process_2021	yellow
286	regulation of hydrolase activity (GO:0051336)	2/73	0.0517203	0.178565	0	0	5.69963	16.8817	RAPGEF6;PLXNA4	GO_Biological_Process_2021	yellow
287	actin filament network formation (GO:0051639)	1/11	0.0536583	0.178565	0	0	20.0909	58.7683	SPIRE1	GO_Biological_Process_2021	yellow
288	cell-cell junction maintenance (GO:0045217)	1/11	0.0536583	0.178565	0	0	20.0909	58.7683	TJP1	GO_Biological_Process_2021	yellow
289	negative regulation of translation, ncRNA-mediated (GO:0040033)	1/11	0.0536583	0.178565	0	0	20.0909	58.7683	TNRC6C	GO_Biological_Process_2021	yellow
290	regulation of histone H3-K9 acetylation (GO:2000615)	1/11	0.0536583	0.178565	0	0	20.0909	58.7683	CAMK1	GO_Biological_Process_2021	yellow
291	central nervous system myelination (GO:0022010)	1/11	0.0536583	0.178565	0	0	20.0909	58.7683	PTEN	GO_Biological_Process_2021	yellow
292	regulation of mesenchymal cell proliferation (GO:0010464)	1/11	0.0536583	0.178565	0	0	20.0909	58.7683	LRP5	GO_Biological_Process_2021	yellow
293	phosphorylated carbohydrate dephosphorylation (GO:0046838)	1/11	0.0536583	0.178565	0	0	20.0909	58.7683	PTEN	GO_Biological_Process_2021	yellow
294	establishment of epithelial cell apical/basal polarity (GO:0045198)	1/11	0.0536583	0.178565	0	0	20.0909	58.7683	MYO9A	GO_Biological_Process_2021	yellow
295	response to prostaglandin E (GO:0034695)	1/11	0.0536583	0.178565	0	0	20.0909	58.7683	GNG2	GO_Biological_Process_2021	yellow
296	inhibitory synapse assembly (GO:1904862)	1/11	0.0536583	0.178565	0	0	20.0909	58.7683	FGF13	GO_Biological_Process_2021	yellow
297	inositol phosphate dephosphorylation (GO:0046855)	1/11	0.0536583	0.178565	0	0	20.0909	58.7683	PTEN	GO_Biological_Process_2021	yellow
298	ketone body metabolic process (GO:1902224)	1/11	0.0536583	0.178565	0	0	20.0909	58.7683	OXCT1	GO_Biological_Process_2021	yellow
299	lipoprotein localization (GO:0044872)	1/11	0.0536583	0.178565	0	0	20.0909	58.7683	PRKCB	GO_Biological_Process_2021	yellow
300	miRNA mediated inhibition of translation (GO:0035278)	1/11	0.0536583	0.178565	0	0	20.0909	58.7683	TNRC6C	GO_Biological_Process_2021	yellow
301	positive regulation of voltage-gated potassium channel activity (GO:1903818)	1/11	0.0536583	0.178565	0	0	20.0909	58.7683	NOS1AP	GO_Biological_Process_2021	yellow
302	presynaptic membrane organization (GO:0097090)	1/11	0.0536583	0.178565	0	0	20.0909	58.7683	PTEN	GO_Biological_Process_2021	yellow
303	regulation of cell migration (GO:0030334)	5/408	0.053981	0.179046	0	0	2.5463	7.43296	TJP1;MCTP1;ROCK2;PTEN;PLXNA4	GO_Biological_Process_2021	yellow
304	actomyosin structure organization (GO:0031032)	2/76	0.0555566	0.181125	0	0	5.46773	15.8037	TJP1;ROCK2	GO_Biological_Process_2021	yellow
305	regulation of epithelial to mesenchymal transition (GO:0010717)	2/76	0.0555566	0.181125	0	0	5.46773	15.8037	PTEN;CLASP2	GO_Biological_Process_2021	yellow
306	adipose tissue development (GO:0060612)	1/12	0.0583926	0.181125	0	0	18.2635	51.8788	LRP5	GO_Biological_Process_2021	yellow
307	regulation of amyloid precursor protein catabolic process (GO:1902991)	1/12	0.0583926	0.181125	0	0	18.2635	51.8788	ROCK2	GO_Biological_Process_2021	yellow
308	regulation of axon regeneration (GO:0048679)	1/12	0.0583926	0.181125	0	0	18.2635	51.8788	RTN4RL1	GO_Biological_Process_2021	yellow
309	negative regulation of glucose transmembrane transport (GO:0010829)	1/12	0.0583926	0.181125	0	0	18.2635	51.8788	PRKCB	GO_Biological_Process_2021	yellow
310	brain morphogenesis (GO:0048854)	1/12	0.0583926	0.181125	0	0	18.2635	51.8788	PTEN	GO_Biological_Process_2021	yellow
311	regulation of hemopoiesis (GO:1903706)	1/12	0.0583926	0.181125	0	0	18.2635	51.8788	PRKCB	GO_Biological_Process_2021	yellow
312	regulation of keratinocyte migration (GO:0051547)	1/12	0.0583926	0.181125	0	0	18.2635	51.8788	PTEN	GO_Biological_Process_2021	yellow
313	regulation of plasminogen activation (GO:0010755)	1/12	0.0583926	0.181125	0	0	18.2635	51.8788	PLGRKT	GO_Biological_Process_2021	yellow
314	regulation of response to oxidative stress (GO:1902882)	1/12	0.0583926	0.181125	0	0	18.2635	51.8788	MCTP1	GO_Biological_Process_2021	yellow
315	regulation of RNA export from nucleus (GO:0046831)	1/12	0.0583926	0.181125	0	0	18.2635	51.8788	AKAP8L	GO_Biological_Process_2021	yellow
316	exit from mitosis (GO:0010458)	1/12	0.0583926	0.181125	0	0	18.2635	51.8788	CLASP2	GO_Biological_Process_2021	yellow
317	inositol phosphate catabolic process (GO:0071545)	1/12	0.0583926	0.181125	0	0	18.2635	51.8788	PTEN	GO_Biological_Process_2021	yellow
318	serine family amino acid biosynthetic process (GO:0009070)	1/12	0.0583926	0.181125	0	0	18.2635	51.8788	SERINC3	GO_Biological_Process_2021	yellow
319	keratan sulfate catabolic process (GO:0042340)	1/12	0.0583926	0.181125	0	0	18.2635	51.8788	HEXA	GO_Biological_Process_2021	yellow
320	microtubule anchoring (GO:0034453)	1/12	0.0583926	0.181125	0	0	18.2635	51.8788	CLASP2	GO_Biological_Process_2021	yellow
321	positive regulation of ubiquitin protein ligase activity (GO:1904668)	1/12	0.0583926	0.181125	0	0	18.2635	51.8788	PTEN	GO_Biological_Process_2021	yellow
322	positive regulation of vascular permeability (GO:0043117)	1/12	0.0583926	0.181125	0	0	18.2635	51.8788	TJP1	GO_Biological_Process_2021	yellow
323	mitotic nuclear membrane disassembly (GO:0007077)	1/12	0.0583926	0.181125	0	0	18.2635	51.8788	PRKCB	GO_Biological_Process_2021	yellow
324	protein auto-ADP-ribosylation (GO:0070213)	1/12	0.0583926	0.181125	0	0	18.2635	51.8788	TNKS	GO_Biological_Process_2021	yellow
325	positive regulation of developmental process (GO:0051094)	3/177	0.0591534	0.182921	0	0	3.50622	9.91426	SPIRE1;CAMK1;CLASP2	GO_Biological_Process_2021	yellow
326	positive regulation of ubiquitin-dependent protein catabolic process (GO:2000060)	2/79	0.0594898	0.183396	0	0	5.25391	14.8263	RNF180;PTEN	GO_Biological_Process_2021	yellow
327	regulation of actomyosin structure organization (GO:0110020)	1/13	0.0631034	0.185979	0	0	16.7407	46.2543	ROCK2	GO_Biological_Process_2021	yellow
328	atrial cardiac muscle cell action potential (GO:0086014)	1/13	0.0631034	0.185979	0	0	16.7407	46.2543	CACNB2	GO_Biological_Process_2021	yellow
329	regulation of chemokine (C-X-C motif) ligand 2 production (GO:2000341)	1/13	0.0631034	0.185979	0	0	16.7407	46.2543	FOXP1	GO_Biological_Process_2021	yellow
330	regulation of histone modification (GO:0031056)	1/13	0.0631034	0.185979	0	0	16.7407	46.2543	AKAP8L	GO_Biological_Process_2021	yellow
331	central nervous system neuron axonogenesis (GO:0021955)	1/13	0.0631034	0.185979	0	0	16.7407	46.2543	PTEN	GO_Biological_Process_2021	yellow
332	chondroitin sulfate catabolic process (GO:0030207)	1/13	0.0631034	0.185979	0	0	16.7407	46.2543	HEXA	GO_Biological_Process_2021	yellow
333	regulation of protein acetylation (GO:1901983)	1/13	0.0631034	0.185979	0	0	16.7407	46.2543	CAMK1	GO_Biological_Process_2021	yellow
334	regulation of tube diameter (GO:0035296)	1/13	0.0631034	0.185979	0	0	16.7407	46.2543	ROCK2	GO_Biological_Process_2021	yellow
335	positive regulation of histone deacetylation (GO:0031065)	1/13	0.0631034	0.185979	0	0	16.7407	46.2543	AKAP8L	GO_Biological_Process_2021	yellow
336	reticulophagy (GO:0061709)	1/13	0.0631034	0.185979	0	0	16.7407	46.2543	ULK2	GO_Biological_Process_2021	yellow
337	semaphorin-plexin signaling pathway involved in neuron projection guidance (GO:1902285)	1/13	0.0631034	0.185979	0	0	16.7407	46.2543	PLXNA4	GO_Biological_Process_2021	yellow
338	positive regulation of nuclear-transcribed mRNA poly(A) tail shortening (GO:0060213)	1/13	0.0631034	0.185979	0	0	16.7407	46.2543	TNRC6C	GO_Biological_Process_2021	yellow
339	positive regulation of protein acetylation (GO:1901985)	1/13	0.0631034	0.185979	0	0	16.7407	46.2543	CAMK1	GO_Biological_Process_2021	yellow
340	vascular process in circulatory system (GO:0003018)	1/13	0.0631034	0.185979	0	0	16.7407	46.2543	ROCK2	GO_Biological_Process_2021	yellow
341	negative regulation by host of viral transcription (GO:0043922)	1/13	0.0631034	0.185979	0	0	16.7407	46.2543	TARDBP	GO_Biological_Process_2021	yellow
342	cell-cell junction organization (GO:0045216)	2/82	0.0635162	0.186648	0	0	5.05612	13.937	TJP1;CADM1	GO_Biological_Process_2021	yellow
343	regulation of interleukin-1 beta production (GO:0032651)	2/83	0.0648784	0.190096	0	0	4.99345	13.6583	SIRPA;FOXP1	GO_Biological_Process_2021	yellow
344	activation of cysteine-type endopeptidase activity (GO:0097202)	1/14	0.0677909	0.191376	0	0	15.4522	41.587	ASPH	GO_Biological_Process_2021	yellow
345	regulation of cAMP-dependent protein kinase activity (GO:2000479)	1/14	0.0677909	0.191376	0	0	15.4522	41.587	PKIG	GO_Biological_Process_2021	yellow
346	bone morphogenesis (GO:0060349)	1/14	0.0677909	0.191376	0	0	15.4522	41.587	LRP5	GO_Biological_Process_2021	yellow
347	C4-dicarboxylate transport (GO:0015740)	1/14	0.0677909	0.191376	0	0	15.4522	41.587	LRRC8D	GO_Biological_Process_2021	yellow
348	regulation of cell projection organization (GO:0031344)	1/14	0.0677909	0.191376	0	0	15.4522	41.587	MYO9A	GO_Biological_Process_2021	yellow
349	regulation of gastrulation (GO:0010470)	1/14	0.0677909	0.191376	0	0	15.4522	41.587	CLASP2	GO_Biological_Process_2021	yellow
350	regulation of histone deacetylation (GO:0031063)	1/14	0.0677909	0.191376	0	0	15.4522	41.587	AKAP8L	GO_Biological_Process_2021	yellow
351	polarized epithelial cell differentiation (GO:0030859)	1/14	0.0677909	0.191376	0	0	15.4522	41.587	MYO9A	GO_Biological_Process_2021	yellow
352	smooth muscle contraction (GO:0006939)	1/14	0.0677909	0.191376	0	0	15.4522	41.587	ROCK2	GO_Biological_Process_2021	yellow
353	positive regulation of protein deacetylation (GO:0090312)	1/14	0.0677909	0.191376	0	0	15.4522	41.587	AKAP8L	GO_Biological_Process_2021	yellow
354	synaptic membrane adhesion (GO:0099560)	1/14	0.0677909	0.191376	0	0	15.4522	41.587	LRRC4	GO_Biological_Process_2021	yellow
355	T-helper cell differentiation (GO:0042093)	1/14	0.0677909	0.191376	0	0	15.4522	41.587	FOXP1	GO_Biological_Process_2021	yellow
356	microvillus organization (GO:0032528)	1/14	0.0677909	0.191376	0	0	15.4522	41.587	RAPGEF6	GO_Biological_Process_2021	yellow
357	regulation of intracellular signal transduction (GO:1902531)	5/437	0.0682524	0.192139	0	0	2.37183	6.36729	PTEN;ARHGAP39;ARHGEF1;ARHGAP5;MYO9A	GO_Biological_Process_2021	yellow
358	positive regulation of endothelial cell migration (GO:0010595)	2/86	0.0690235	0.19315	0	0	4.81438	12.8703	ROCK2;FOXP1	GO_Biological_Process_2021	yellow
359	negative regulation of androgen receptor signaling pathway (GO:0060766)	1/15	0.0724552	0.19315	0	0	14.3478	37.6598	FOXP1	GO_Biological_Process_2021	yellow
360	catecholamine metabolic process (GO:0006584)	1/15	0.0724552	0.19315	0	0	14.3478	37.6598	RNF180	GO_Biological_Process_2021	yellow
361	regulation of extracellular matrix disassembly (GO:0010715)	1/15	0.0724552	0.19315	0	0	14.3478	37.6598	CLASP2	GO_Biological_Process_2021	yellow
362	central nervous system neuron development (GO:0021954)	1/15	0.0724552	0.19315	0	0	14.3478	37.6598	PTEN	GO_Biological_Process_2021	yellow
363	regulation of neuron projection arborization (GO:0150011)	1/15	0.0724552	0.19315	0	0	14.3478	37.6598	MYO9A	GO_Biological_Process_2021	yellow
364	regulation of nuclear-transcribed mRNA catabolic process, deadenylation-dependent decay (GO:1900151)	1/15	0.0724552	0.19315	0	0	14.3478	37.6598	TNRC6C	GO_Biological_Process_2021	yellow
365	regulation of nuclear-transcribed mRNA poly(A) tail shortening (GO:0060211)	1/15	0.0724552	0.19315	0	0	14.3478	37.6598	TNRC6C	GO_Biological_Process_2021	yellow
366	establishment of apical/basal cell polarity (GO:0035089)	1/15	0.0724552	0.19315	0	0	14.3478	37.6598	MYO9A	GO_Biological_Process_2021	yellow
367	establishment of spindle localization (GO:0051293)	1/15	0.0724552	0.19315	0	0	14.3478	37.6598	CLASP2	GO_Biological_Process_2021	yellow
368	heterocycle biosynthetic process (GO:0018130)	1/15	0.0724552	0.19315	0	0	14.3478	37.6598	GPHN	GO_Biological_Process_2021	yellow
369	RNA phosphodiester bond hydrolysis, endonucleolytic (GO:0090502)	1/15	0.0724552	0.19315	0	0	14.3478	37.6598	ZC3H12B	GO_Biological_Process_2021	yellow
370	positive regulation of nuclear-transcribed mRNA catabolic process, deadenylation-dependent decay (GO:1900153)	1/15	0.0724552	0.19315	0	0	14.3478	37.6598	TNRC6C	GO_Biological_Process_2021	yellow
371	positive regulation of protein export from nucleus (GO:0046827)	1/15	0.0724552	0.19315	0	0	14.3478	37.6598	CAMK1	GO_Biological_Process_2021	yellow
372	T cell proliferation (GO:0042098)	1/15	0.0724552	0.19315	0	0	14.3478	37.6598	CADM1	GO_Biological_Process_2021	yellow
373	positive regulation of sprouting angiogenesis (GO:1903672)	1/15	0.0724552	0.19315	0	0	14.3478	37.6598	TJP1	GO_Biological_Process_2021	yellow
374	microvillus assembly (GO:0030033)	1/15	0.0724552	0.19315	0	0	14.3478	37.6598	RAPGEF6	GO_Biological_Process_2021	yellow
375	protein hydroxylation (GO:0018126)	1/15	0.0724552	0.19315	0	0	14.3478	37.6598	ASPH	GO_Biological_Process_2021	yellow
376	protein localization to cell-cell junction (GO:0150105)	1/15	0.0724552	0.19315	0	0	14.3478	37.6598	TJP1	GO_Biological_Process_2021	yellow
377	protein localization to chromosome, telomeric region (GO:0070198)	1/15	0.0724552	0.19315	0	0	14.3478	37.6598	TNKS	GO_Biological_Process_2021	yellow
378	regulation of cation channel activity (GO:2001257)	2/89	0.0732536	0.193737	0	0	4.64767	12.1482	CACNB2;FGF13	GO_Biological_Process_2021	yellow
379	regulation of endothelial cell migration (GO:0010594)	2/89	0.0732536	0.193737	0	0	4.64767	12.1482	ROCK2;FOXP1	GO_Biological_Process_2021	yellow
380	second-messenger-mediated signaling (GO:0019932)	2/89	0.0732536	0.193737	0	0	4.64767	12.1482	MCTP1;PPP1R9A	GO_Biological_Process_2021	yellow
381	sodium ion transport (GO:0006814)	2/90	0.0746819	0.196996	0	0	4.59462	11.9208	SLC24A3;FGF13	GO_Biological_Process_2021	yellow
382	3'-UTR-mediated mRNA destabilization (GO:0061158)	1/16	0.0770964	0.198163	0	0	13.3906	34.316	TARDBP	GO_Biological_Process_2021	yellow
383	autophagy of nucleus (GO:0044804)	1/16	0.0770964	0.198163	0	0	13.3906	34.316	ULK2	GO_Biological_Process_2021	yellow
384	regulation of establishment of cell polarity (GO:2000114)	1/16	0.0770964	0.198163	0	0	13.3906	34.316	ROCK2	GO_Biological_Process_2021	yellow
385	negative regulation of telomere maintenance (GO:0032205)	1/16	0.0770964	0.198163	0	0	13.3906	34.316	TNKS	GO_Biological_Process_2021	yellow
386	ceramide catabolic process (GO:0046514)	1/16	0.0770964	0.198163	0	0	13.3906	34.316	HEXA	GO_Biological_Process_2021	yellow
387	dendritic spine morphogenesis (GO:0060997)	1/16	0.0770964	0.198163	0	0	13.3906	34.316	PTEN	GO_Biological_Process_2021	yellow
388	regulation of monocyte differentiation (GO:0045655)	1/16	0.0770964	0.198163	0	0	13.3906	34.316	FOXP1	GO_Biological_Process_2021	yellow
389	regulation of neurotransmitter transport (GO:0051588)	1/16	0.0770964	0.198163	0	0	13.3906	34.316	MCTP1	GO_Biological_Process_2021	yellow
390	T cell mediated immunity (GO:0002456)	1/16	0.0770964	0.198163	0	0	13.3906	34.316	CADM1	GO_Biological_Process_2021	yellow
391	positive regulation of syncytium formation by plasma membrane fusion (GO:0060143)	1/16	0.0770964	0.198163	0	0	13.3906	34.316	CAMK1	GO_Biological_Process_2021	yellow
392	positive regulation of peptidyl-serine phosphorylation (GO:0033138)	2/93	0.0790201	0.20259	0	0	4.44248	11.2752	CAMK1;FNIP1	GO_Biological_Process_2021	yellow
393	negative regulation of MAPK cascade (GO:0043409)	2/94	0.0804834	0.204796	0	0	4.39397	11.0715	PTEN;SIRPA	GO_Biological_Process_2021	yellow
394	negative regulation of chemokine production (GO:0032682)	1/17	0.0817146	0.204796	0	0	12.553	31.4393	SIRPA	GO_Biological_Process_2021	yellow
395	negative regulation of phagocytosis (GO:0050765)	1/17	0.0817146	0.204796	0	0	12.553	31.4393	SIRPA	GO_Biological_Process_2021	yellow
396	cellular modified amino acid catabolic process (GO:0042219)	1/17	0.0817146	0.204796	0	0	12.553	31.4393	GGACT	GO_Biological_Process_2021	yellow
397	regulation of establishment of endothelial barrier (GO:1903140)	1/17	0.0817146	0.204796	0	0	12.553	31.4393	ROCK2	GO_Biological_Process_2021	yellow
398	negative regulation of vascular associated smooth muscle cell proliferation (GO:1904706)	1/17	0.0817146	0.204796	0	0	12.553	31.4393	PTEN	GO_Biological_Process_2021	yellow
399	positive regulation of muscle hypertrophy (GO:0014742)	1/17	0.0817146	0.204796	0	0	12.553	31.4393	ROCK2	GO_Biological_Process_2021	yellow
400	membrane depolarization during cardiac muscle cell action potential (GO:0086012)	1/17	0.0817146	0.204796	0	0	12.553	31.4393	CACNB2	GO_Biological_Process_2021	yellow
401	positive regulation of telomere capping (GO:1904355)	1/17	0.0817146	0.204796	0	0	12.553	31.4393	TNKS	GO_Biological_Process_2021	yellow
402	3'-UTR-mediated mRNA stabilization (GO:0070935)	1/18	0.08631	0.208513	0	0	11.814	28.9421	TARDBP	GO_Biological_Process_2021	yellow
403	acidic amino acid transport (GO:0015800)	1/18	0.08631	0.208513	0	0	11.814	28.9421	LRRC8D	GO_Biological_Process_2021	yellow
404	regulation of delayed rectifier potassium channel activity (GO:1902259)	1/18	0.08631	0.208513	0	0	11.814	28.9421	NOS1AP	GO_Biological_Process_2021	yellow
405	regulation of establishment or maintenance of cell polarity (GO:0032878)	1/18	0.08631	0.208513	0	0	11.814	28.9421	ROCK2	GO_Biological_Process_2021	yellow
406	positive regulation of amyloid-beta formation (GO:1902004)	1/18	0.08631	0.208513	0	0	11.814	28.9421	ROCK2	GO_Biological_Process_2021	yellow
407	positive regulation of cardiac muscle hypertrophy (GO:0010613)	1/18	0.08631	0.208513	0	0	11.814	28.9421	ROCK2	GO_Biological_Process_2021	yellow
408	regulation of telomere maintenance via telomere lengthening (GO:1904356)	1/18	0.08631	0.208513	0	0	11.814	28.9421	TNKS	GO_Biological_Process_2021	yellow
409	positive regulation of excitatory postsynaptic potential (GO:2000463)	1/18	0.08631	0.208513	0	0	11.814	28.9421	PTEN	GO_Biological_Process_2021	yellow
410	positive regulation of extracellular matrix organization (GO:1903055)	1/18	0.08631	0.208513	0	0	11.814	28.9421	CLASP2	GO_Biological_Process_2021	yellow
411	response to axon injury (GO:0048678)	1/18	0.08631	0.208513	0	0	11.814	28.9421	RTN4RL1	GO_Biological_Process_2021	yellow
412	hyaluronan catabolic process (GO:0030214)	1/18	0.08631	0.208513	0	0	11.814	28.9421	HEXA	GO_Biological_Process_2021	yellow
413	RNA destabilization (GO:0050779)	1/18	0.08631	0.208513	0	0	11.814	28.9421	ROCK2	GO_Biological_Process_2021	yellow
414	positive regulation of nitric-oxide synthase activity (GO:0051000)	1/18	0.08631	0.208513	0	0	11.814	28.9421	NOS1AP	GO_Biological_Process_2021	yellow
415	ventricular cardiac muscle cell action potential (GO:0086005)	1/18	0.08631	0.208513	0	0	11.814	28.9421	SNTA1	GO_Biological_Process_2021	yellow
416	presynapse assembly (GO:0099054)	1/18	0.08631	0.208513	0	0	11.814	28.9421	PTEN	GO_Biological_Process_2021	yellow
417	organic anion transport (GO:0015711)	2/99	0.0879246	0.211905	0	0	4.16642	10.1297	ABCC5;LRRC8D	GO_Biological_Process_2021	yellow
418	negative regulation of cytokine production involved in inflammatory response (GO:1900016)	1/19	0.0908825	0.214582	0	0	11.1571	26.7569	SIRPA	GO_Biological_Process_2021	yellow
419	regulation of cell-cell adhesion mediated by cadherin (GO:2000047)	1/19	0.0908825	0.214582	0	0	11.1571	26.7569	TJP1	GO_Biological_Process_2021	yellow
420	regulation of glucose transmembrane transport (GO:0010827)	1/19	0.0908825	0.214582	0	0	11.1571	26.7569	PRKCB	GO_Biological_Process_2021	yellow
421	neural crest cell differentiation (GO:0014033)	1/19	0.0908825	0.214582	0	0	11.1571	26.7569	FBXL17	GO_Biological_Process_2021	yellow
422	regulation of nervous system process (GO:0031644)	1/19	0.0908825	0.214582	0	0	11.1571	26.7569	ROCK2	GO_Biological_Process_2021	yellow
423	regulation of stem cell population maintenance (GO:2000036)	1/19	0.0908825	0.214582	0	0	11.1571	26.7569	CNOT3	GO_Biological_Process_2021	yellow
424	heparan sulfate proteoglycan biosynthetic process (GO:0015012)	1/19	0.0908825	0.214582	0	0	11.1571	26.7569	EXTL3	GO_Biological_Process_2021	yellow
425	positive regulation of mitochondrial fission (GO:0090141)	1/19	0.0908825	0.214582	0	0	11.1571	26.7569	SPIRE1	GO_Biological_Process_2021	yellow
426	positive regulation of cell cycle process (GO:0090068)	2/101	0.090957	0.214582	0	0	4.08184	9.78567	CSPP1;LRP5	GO_Biological_Process_2021	yellow
427	negative regulation of multicellular organismal process (GO:0051241)	3/214	0.0921674	0.216928	0	0	2.88596	6.88056	ROCK2;PLCL1;PTEN	GO_Biological_Process_2021	yellow
428	calcium-mediated signaling (GO:0019722)	2/102	0.0924847	0.217166	0	0	4.04082	9.62002	MCTP1;PPP1R9A	GO_Biological_Process_2021	yellow
429	positive regulation of gene expression (GO:0010628)	5/482	0.0941586	0.217482	0	0	2.14311	5.06368	TNRC6C;SLC24A3;CADM1;ROCK2;NOS1AP	GO_Biological_Process_2021	yellow
430	adaptive immune response based on somatic recombination of immune receptors built from immunoglobulin superfamily domains (GO:0002460)	1/20	0.0954324	0.217482	0	0	10.5694	24.831	BACH2	GO_Biological_Process_2021	yellow
431	negative regulation of cyclin-dependent protein serine/threonine kinase activity (GO:0045736)	1/20	0.0954324	0.217482	0	0	10.5694	24.831	PTEN	GO_Biological_Process_2021	yellow
432	cellular response to nitrogen compound (GO:1901699)	1/20	0.0954324	0.217482	0	0	10.5694	24.831	ROCK2	GO_Biological_Process_2021	yellow
433	cortical actin cytoskeleton organization (GO:0030866)	1/20	0.0954324	0.217482	0	0	10.5694	24.831	ROCK2	GO_Biological_Process_2021	yellow
434	establishment of epithelial cell polarity (GO:0090162)	1/20	0.0954324	0.217482	0	0	10.5694	24.831	MYO9A	GO_Biological_Process_2021	yellow
435	ganglioside metabolic process (GO:0001573)	1/20	0.0954324	0.217482	0	0	10.5694	24.831	HEXA	GO_Biological_Process_2021	yellow
436	gastrulation (GO:0007369)	1/20	0.0954324	0.217482	0	0	10.5694	24.831	LRP5	GO_Biological_Process_2021	yellow
437	positive regulation of natural killer cell mediated cytotoxicity (GO:0045954)	1/20	0.0954324	0.217482	0	0	10.5694	24.831	CADM1	GO_Biological_Process_2021	yellow
438	positive regulation of protein processing (GO:0010954)	1/20	0.0954324	0.217482	0	0	10.5694	24.831	PLGRKT	GO_Biological_Process_2021	yellow
439	mitochondrial cytochrome c oxidase assembly (GO:0033617)	1/20	0.0954324	0.217482	0	0	10.5694	24.831	COX16	GO_Biological_Process_2021	yellow
440	post-transcriptional gene silencing by RNA (GO:0035194)	1/20	0.0954324	0.217482	0	0	10.5694	24.831	TNRC6C	GO_Biological_Process_2021	yellow
441	myeloid cell development (GO:0061515)	1/20	0.0954324	0.217482	0	0	10.5694	24.831	FOXP1	GO_Biological_Process_2021	yellow
442	small GTPase mediated signal transduction (GO:0007264)	2/106	0.0986696	0.222748	0	0	3.88462	8.99668	RAPGEF5;RAPGEF6	GO_Biological_Process_2021	yellow
443	supramolecular fiber organization (GO:0097435)	4/351	0.0993699	0.222748	0	0	2.34786	5.421	COL27A1;TUBGCP5;FGF13;PPP1R9A	GO_Biological_Process_2021	yellow
444	actin nucleation (GO:0045010)	1/21	0.0999598	0.222748	0	0	10.0404	23.1229	SPIRE1	GO_Biological_Process_2021	yellow
445	regulation of cell-substrate junction assembly (GO:0090109)	1/21	0.0999598	0.222748	0	0	10.0404	23.1229	ROCK2	GO_Biological_Process_2021	yellow
446	negative regulation of peptidyl-serine phosphorylation (GO:0033137)	1/21	0.0999598	0.222748	0	0	10.0404	23.1229	PTEN	GO_Biological_Process_2021	yellow
447	negative regulation of response to wounding (GO:1903035)	1/21	0.0999598	0.222748	0	0	10.0404	23.1229	RTN4RL1	GO_Biological_Process_2021	yellow
448	nuclear-transcribed mRNA poly(A) tail shortening (GO:0000289)	1/21	0.0999598	0.222748	0	0	10.0404	23.1229	CNOT3	GO_Biological_Process_2021	yellow
449	regulation of ubiquitin protein ligase activity (GO:1904666)	1/21	0.0999598	0.222748	0	0	10.0404	23.1229	PTEN	GO_Biological_Process_2021	yellow
450	heparan sulfate proteoglycan metabolic process (GO:0030201)	1/21	0.0999598	0.222748	0	0	10.0404	23.1229	EXTL3	GO_Biological_Process_2021	yellow
451	intrinsic apoptotic signaling pathway in response to DNA damage by p53 class mediator (GO:0042771)	1/21	0.0999598	0.222748	0	0	10.0404	23.1229	CDIP1	GO_Biological_Process_2021	yellow
452	negative regulation of biomineral tissue development (GO:0070168)	1/22	0.104465	0.22873	0	0	9.56181	21.5992	ROCK2	GO_Biological_Process_2021	yellow
453	amino acid import (GO:0043090)	1/22	0.104465	0.22873	0	0	9.56181	21.5992	SLC7A8	GO_Biological_Process_2021	yellow
454	negative regulation of cyclin-dependent protein kinase activity (GO:1904030)	1/22	0.104465	0.22873	0	0	9.56181	21.5992	PTEN	GO_Biological_Process_2021	yellow
455	cellular response to osmotic stress (GO:0071470)	1/22	0.104465	0.22873	0	0	9.56181	21.5992	LRRC8D	GO_Biological_Process_2021	yellow
456	osteoclast differentiation (GO:0030316)	1/22	0.104465	0.22873	0	0	9.56181	21.5992	FOXP1	GO_Biological_Process_2021	yellow
457	positive regulation of amyloid precursor protein catabolic process (GO:1902993)	1/22	0.104465	0.22873	0	0	9.56181	21.5992	ROCK2	GO_Biological_Process_2021	yellow
458	positive regulation of dendritic spine development (GO:0060999)	1/22	0.104465	0.22873	0	0	9.56181	21.5992	CAMK1	GO_Biological_Process_2021	yellow
459	protein localization to cell junction (GO:1902414)	1/22	0.104465	0.22873	0	0	9.56181	21.5992	TJP1	GO_Biological_Process_2021	yellow
460	regulation of protein serine/threonine kinase activity (GO:0071900)	2/111	0.106559	0.232809	0	0	3.70549	8.29678	LRP5;CAMK1	GO_Biological_Process_2021	yellow
461	regulation of cytoskeleton organization (GO:0051493)	2/112	0.108158	0.233458	0	0	3.67161	8.16628	TJP1;ROCK2	GO_Biological_Process_2021	yellow
462	phosphatidylinositol metabolic process (GO:0046488)	2/112	0.108158	0.233458	0	0	3.67161	8.16628	INPP4B;PTEN	GO_Biological_Process_2021	yellow
463	regulation of calcium ion transmembrane transport (GO:1903169)	1/23	0.108947	0.233458	0	0	9.12672	20.2329	NOS1AP	GO_Biological_Process_2021	yellow
464	negative regulation of phosphoprotein phosphatase activity (GO:0032515)	1/23	0.108947	0.233458	0	0	9.12672	20.2329	ROCK2	GO_Biological_Process_2021	yellow
465	oligosaccharide biosynthetic process (GO:0009312)	1/23	0.108947	0.233458	0	0	9.12672	20.2329	ST3GAL3	GO_Biological_Process_2021	yellow
466	regulation of protein export from nucleus (GO:0046825)	1/23	0.108947	0.233458	0	0	9.12672	20.2329	CAMK1	GO_Biological_Process_2021	yellow
467	regulation of telomere capping (GO:1904353)	1/23	0.108947	0.233458	0	0	9.12672	20.2329	TNKS	GO_Biological_Process_2021	yellow
468	respiratory chain complex IV assembly (GO:0008535)	1/23	0.108947	0.233458	0	0	9.12672	20.2329	COX16	GO_Biological_Process_2021	yellow
469	positive regulation of natural killer cell mediated immunity (GO:0002717)	1/23	0.108947	0.233458	0	0	9.12672	20.2329	CADM1	GO_Biological_Process_2021	yellow
470	negative regulation of cell motility (GO:2000146)	2/114	0.111373	0.235973	0	0	3.60569	7.91401	MCTP1;PTEN	GO_Biological_Process_2021	yellow
471	positive regulation of cellular component organization (GO:0051130)	2/114	0.111373	0.235973	0	0	3.60569	7.91401	CAMK1;FNIP1	GO_Biological_Process_2021	yellow
472	calcium ion transport (GO:0006816)	2/115	0.11299	0.235973	0	0	3.5736	7.79207	CACNB2;SLC24A3	GO_Biological_Process_2021	yellow
473	amino acid import across plasma membrane (GO:0089718)	1/24	0.113408	0.235973	0	0	8.72947	19.002	SLC7A8	GO_Biological_Process_2021	yellow
474	axon extension (GO:0048675)	1/24	0.113408	0.235973	0	0	8.72947	19.002	ULK2	GO_Biological_Process_2021	yellow
475	regulation of cardiac muscle hypertrophy (GO:0010611)	1/24	0.113408	0.235973	0	0	8.72947	19.002	ROCK2	GO_Biological_Process_2021	yellow
476	regulation of cell size (GO:0008361)	1/24	0.113408	0.235973	0	0	8.72947	19.002	PTEN	GO_Biological_Process_2021	yellow
477	carbohydrate biosynthetic process (GO:0016051)	1/24	0.113408	0.235973	0	0	8.72947	19.002	ST3GAL3	GO_Biological_Process_2021	yellow
478	regulation of cellular response to transforming growth factor beta stimulus (GO:1903844)	1/24	0.113408	0.235973	0	0	8.72947	19.002	BCL9	GO_Biological_Process_2021	yellow
479	cellular response to catecholamine stimulus (GO:0071870)	1/24	0.113408	0.235973	0	0	8.72947	19.002	GNG2	GO_Biological_Process_2021	yellow
480	negative regulation of synaptic transmission (GO:0050805)	1/24	0.113408	0.235973	0	0	8.72947	19.002	PTEN	GO_Biological_Process_2021	yellow
481	regulation of monooxygenase activity (GO:0032768)	1/24	0.113408	0.235973	0	0	8.72947	19.002	NOS1AP	GO_Biological_Process_2021	yellow
482	regulation of vascular endothelial growth factor receptor signaling pathway (GO:0030947)	1/24	0.113408	0.235973	0	0	8.72947	19.002	PRKCB	GO_Biological_Process_2021	yellow
483	protein kinase B signaling (GO:0043491)	1/24	0.113408	0.235973	0	0	8.72947	19.002	PTEN	GO_Biological_Process_2021	yellow
484	positive regulation of angiogenesis (GO:0045766)	2/116	0.114613	0.237988	0	0	3.54207	7.6728	TJP1;PRKCB	GO_Biological_Process_2021	yellow
485	positive regulation of cell projection organization (GO:0031346)	2/117	0.116243	0.240874	0	0	3.51109	7.55614	CAMK1;PLXNA4	GO_Biological_Process_2021	yellow
486	protein quality control for misfolded or incompletely synthesized proteins (GO:0006515)	1/25	0.117846	0.241212	0	0	8.36532	17.8882	FBXL17	GO_Biological_Process_2021	yellow
487	negative regulation of endocytosis (GO:0045806)	1/25	0.117846	0.241212	0	0	8.36532	17.8882	MCTP1	GO_Biological_Process_2021	yellow
488	regulation of epidermal cell differentiation (GO:0045604)	1/25	0.117846	0.241212	0	0	8.36532	17.8882	ROCK2	GO_Biological_Process_2021	yellow
489	regulation of mitochondrial fission (GO:0090140)	1/25	0.117846	0.241212	0	0	8.36532	17.8882	SPIRE1	GO_Biological_Process_2021	yellow
490	organophosphate ester transport (GO:0015748)	1/25	0.117846	0.241212	0	0	8.36532	17.8882	PITPNC1	GO_Biological_Process_2021	yellow
491	phosphatidylinositol dephosphorylation (GO:0046856)	1/25	0.117846	0.241212	0	0	8.36532	17.8882	PTEN	GO_Biological_Process_2021	yellow
492	regulation of actin filament bundle assembly (GO:0032231)	1/26	0.122262	0.247729	0	0	8.0303	16.8764	ROCK2	GO_Biological_Process_2021	yellow
493	regulation of biomineral tissue development (GO:0070167)	1/26	0.122262	0.247729	0	0	8.0303	16.8764	ROCK2	GO_Biological_Process_2021	yellow
494	negative regulation of telomere maintenance via telomere lengthening (GO:1904357)	1/26	0.122262	0.247729	0	0	8.0303	16.8764	TNKS	GO_Biological_Process_2021	yellow
495	hippo signaling (GO:0035329)	1/26	0.122262	0.247729	0	0	8.0303	16.8764	TJP1	GO_Biological_Process_2021	yellow
496	TOR signaling (GO:0031929)	1/26	0.122262	0.247729	0	0	8.0303	16.8764	FNIP1	GO_Biological_Process_2021	yellow
497	regulation of anatomical structure morphogenesis (GO:0022603)	2/123	0.12614	0.247778	0	0	3.33598	6.90669	TANC2;CLASP2	GO_Biological_Process_2021	yellow
498	positive regulation of macromolecule metabolic process (GO:0010604)	4/384	0.126436	0.247778	0	0	2.14035	4.42629	TNRC6C;SLC24A3;ROCK2;NOS1AP	GO_Biological_Process_2021	yellow
499	regulation of cardiac muscle cell contraction (GO:0086004)	1/27	0.126657	0.247778	0	0	7.72106	15.9538	FGF13	GO_Biological_Process_2021	yellow
500	negative regulation of insulin receptor signaling pathway (GO:0046627)	1/27	0.126657	0.247778	0	0	7.72106	15.9538	PRKCB	GO_Biological_Process_2021	yellow
501	dendritic spine organization (GO:0097061)	1/27	0.126657	0.247778	0	0	7.72106	15.9538	PTEN	GO_Biological_Process_2021	yellow
502	entrainment of circadian clock by photoperiod (GO:0043153)	1/27	0.126657	0.247778	0	0	7.72106	15.9538	FBXL17	GO_Biological_Process_2021	yellow
503	positive regulation of calcium ion transmembrane transport (GO:1904427)	1/27	0.126657	0.247778	0	0	7.72106	15.9538	CACNB2	GO_Biological_Process_2021	yellow
504	positive regulation of muscle cell differentiation (GO:0051149)	1/27	0.126657	0.247778	0	0	7.72106	15.9538	CAMK1	GO_Biological_Process_2021	yellow
505	positive regulation of nitric oxide biosynthetic process (GO:0045429)	1/27	0.126657	0.247778	0	0	7.72106	15.9538	NOS1AP	GO_Biological_Process_2021	yellow
506	L-alpha-amino acid transmembrane transport (GO:1902475)	1/27	0.126657	0.247778	0	0	7.72106	15.9538	SLC7A8	GO_Biological_Process_2021	yellow
507	positive regulation of nuclear division (GO:0051785)	1/27	0.126657	0.247778	0	0	7.72106	15.9538	LRP5	GO_Biological_Process_2021	yellow
508	microtubule polymerization or depolymerization (GO:0031109)	1/27	0.126657	0.247778	0	0	7.72106	15.9538	FGF13	GO_Biological_Process_2021	yellow
509	mitotic chromosome condensation (GO:0007076)	1/27	0.126657	0.247778	0	0	7.72106	15.9538	AKAP8L	GO_Biological_Process_2021	yellow
510	modulation of excitatory postsynaptic potential (GO:0098815)	1/27	0.126657	0.247778	0	0	7.72106	15.9538	PTEN	GO_Biological_Process_2021	yellow
511	protein export from nucleus (GO:0006611)	1/27	0.126657	0.247778	0	0	7.72106	15.9538	STRADA	GO_Biological_Process_2021	yellow
512	non-canonical Wnt signaling pathway (GO:0035567)	2/124	0.127809	0.247778	0	0	3.30846	6.80624	TNRC6C;GNG2	GO_Biological_Process_2021	yellow
513	regulation of tumor necrosis factor production (GO:0032680)	2/124	0.127809	0.247778	0	0	3.30846	6.80624	SIRPA;FOXP1	GO_Biological_Process_2021	yellow
514	negative regulation of cellular response to insulin stimulus (GO:1900077)	1/28	0.131029	0.247778	0	0	7.43472	15.1098	PRKCB	GO_Biological_Process_2021	yellow
515	bile acid and bile salt transport (GO:0015721)	1/28	0.131029	0.247778	0	0	7.43472	15.1098	ABCC3	GO_Biological_Process_2021	yellow
516	calcium ion import (GO:0070509)	1/28	0.131029	0.247778	0	0	7.43472	15.1098	CACNB2	GO_Biological_Process_2021	yellow
517	regulation of insulin secretion involved in cellular response to glucose stimulus (GO:0061178)	1/28	0.131029	0.247778	0	0	7.43472	15.1098	LRP5	GO_Biological_Process_2021	yellow
518	neutral amino acid transport (GO:0015804)	1/28	0.131029	0.247778	0	0	7.43472	15.1098	SLC7A8	GO_Biological_Process_2021	yellow
519	regulation of microtubule polymerization or depolymerization (GO:0031110)	1/28	0.131029	0.247778	0	0	7.43472	15.1098	CLASP2	GO_Biological_Process_2021	yellow
520	phagosome acidification (GO:0090383)	1/28	0.131029	0.247778	0	0	7.43472	15.1098	ATP6V0B	GO_Biological_Process_2021	yellow
521	regulation of plasma membrane bounded cell projection organization (GO:0120035)	1/28	0.131029	0.247778	0	0	7.43472	15.1098	PTEN	GO_Biological_Process_2021	yellow
522	regulation of postsynapse organization (GO:0099175)	1/28	0.131029	0.247778	0	0	7.43472	15.1098	TANC2	GO_Biological_Process_2021	yellow
523	photoperiodism (GO:0009648)	1/28	0.131029	0.247778	0	0	7.43472	15.1098	FBXL17	GO_Biological_Process_2021	yellow
524	regulation of sodium ion transmembrane transport (GO:1902305)	1/28	0.131029	0.247778	0	0	7.43472	15.1098	SNTA1	GO_Biological_Process_2021	yellow
525	RNA phosphodiester bond hydrolysis (GO:0090501)	1/28	0.131029	0.247778	0	0	7.43472	15.1098	ZC3H12B	GO_Biological_Process_2021	yellow
526	positive regulation of monooxygenase activity (GO:0032770)	1/28	0.131029	0.247778	0	0	7.43472	15.1098	NOS1AP	GO_Biological_Process_2021	yellow
527	keratan sulfate biosynthetic process (GO:0018146)	1/28	0.131029	0.247778	0	0	7.43472	15.1098	ST3GAL3	GO_Biological_Process_2021	yellow
528	positive regulation of nitric oxide metabolic process (GO:1904407)	1/28	0.131029	0.247778	0	0	7.43472	15.1098	NOS1AP	GO_Biological_Process_2021	yellow
529	L-amino acid transport (GO:0015807)	1/28	0.131029	0.247778	0	0	7.43472	15.1098	SLC7A8	GO_Biological_Process_2021	yellow
530	sulfur compound transport (GO:0072348)	1/28	0.131029	0.247778	0	0	7.43472	15.1098	LRRC8D	GO_Biological_Process_2021	yellow
531	negative regulation of cell growth (GO:0030308)	2/126	0.131162	0.247778	0	0	3.25477	6.61149	ULK2;FGF13	GO_Biological_Process_2021	yellow
532	phosphatidylinositol biosynthetic process (GO:0006661)	2/126	0.131162	0.247778	0	0	3.25477	6.61149	INPP4B;PTEN	GO_Biological_Process_2021	yellow
533	microtubule cytoskeleton organization involved in mitosis (GO:1902850)	2/128	0.134536	0.250566	0	0	3.20279	6.42455	TNKS;CLASP2	GO_Biological_Process_2021	yellow
534	regulation of transcription by RNA polymerase II (GO:0006357)	15/2206	0.134656	0.250566	0	0	1.42634	2.85987	PRKCB;TNKS;KCNIP3;AKAP8L;PTEN;LRP5;BACH2;MED12L;FOXP1;TNRC6C;BCL9;PHF14;CAMK1;FNIP1;ZNF697	GO_Biological_Process_2021	yellow
535	actin filament polymerization (GO:0030041)	1/29	0.13538	0.250566	0	0	7.16883	14.3353	SPIRE1	GO_Biological_Process_2021	yellow
536	negative regulation of epithelial to mesenchymal transition (GO:0010719)	1/29	0.13538	0.250566	0	0	7.16883	14.3353	PTEN	GO_Biological_Process_2021	yellow
537	regulation of calcium ion transmembrane transporter activity (GO:1901019)	1/29	0.13538	0.250566	0	0	7.16883	14.3353	CACNB2	GO_Biological_Process_2021	yellow
538	beta-catenin-TCF complex assembly (GO:1904837)	1/29	0.13538	0.250566	0	0	7.16883	14.3353	BCL9	GO_Biological_Process_2021	yellow
539	regulation of DNA biosynthetic process (GO:2000278)	1/29	0.13538	0.250566	0	0	7.16883	14.3353	TNKS	GO_Biological_Process_2021	yellow
540	regulation of neuronal synaptic plasticity (GO:0048168)	1/29	0.13538	0.250566	0	0	7.16883	14.3353	MCTP1	GO_Biological_Process_2021	yellow
541	regulation of response to biotic stimulus (GO:0002831)	1/29	0.13538	0.250566	0	0	7.16883	14.3353	FOXP1	GO_Biological_Process_2021	yellow
542	establishment of mitotic spindle localization (GO:0040001)	1/29	0.13538	0.250566	0	0	7.16883	14.3353	CLASP2	GO_Biological_Process_2021	yellow
543	protein ADP-ribosylation (GO:0006471)	1/29	0.13538	0.250566	0	0	7.16883	14.3353	TNKS	GO_Biological_Process_2021	yellow
544	cell cycle G2/M phase transition (GO:0044839)	2/131	0.139633	0.254824	0	0	3.12783	6.15787	AKAP8L;FBXL17	GO_Biological_Process_2021	yellow
545	negative regulation of cytoskeleton organization (GO:0051494)	1/30	0.13971	0.254824	0	0	6.92128	13.6224	TJP1	GO_Biological_Process_2021	yellow
546	chondroitin sulfate metabolic process (GO:0030204)	1/30	0.13971	0.254824	0	0	6.92128	13.6224	HEXA	GO_Biological_Process_2021	yellow
547	regulation of natural killer cell mediated cytotoxicity (GO:0042269)	1/30	0.13971	0.254824	0	0	6.92128	13.6224	CADM1	GO_Biological_Process_2021	yellow
548	plasma membrane invagination (GO:0099024)	1/30	0.13971	0.254824	0	0	6.92128	13.6224	SPIRE1	GO_Biological_Process_2021	yellow
549	positive regulation of endopeptidase activity (GO:0010950)	1/30	0.13971	0.254824	0	0	6.92128	13.6224	ROCK2	GO_Biological_Process_2021	yellow
550	maintenance of blood-brain barrier (GO:0035633)	1/30	0.13971	0.254824	0	0	6.92128	13.6224	TJP1	GO_Biological_Process_2021	yellow
551	mRNA splice site selection (GO:0006376)	1/30	0.13971	0.254824	0	0	6.92128	13.6224	LUC7L2	GO_Biological_Process_2021	yellow
552	phosphorylation (GO:0016310)	4/400	0.140576	0.255939	0	0	2.05219	4.02641	PRKCB;STRADA;ROCK2;CAMK1	GO_Biological_Process_2021	yellow
553	regulation of cell adhesion (GO:0030155)	2/133	0.143055	0.256173	0	0	3.07976	5.98869	ROCK2;PLXNA4	GO_Biological_Process_2021	yellow
554	RNA metabolic process (GO:0016070)	2/133	0.143055	0.256173	0	0	3.07976	5.98869	HNRNPH1;RBM5	GO_Biological_Process_2021	yellow
555	proteoglycan biosynthetic process (GO:0030166)	1/31	0.144017	0.256173	0	0	6.69024	12.9645	EXTL3	GO_Biological_Process_2021	yellow
556	negative regulation of DNA binding (GO:0043392)	1/31	0.144017	0.256173	0	0	6.69024	12.9645	TNKS	GO_Biological_Process_2021	yellow
557	negative regulation of interleukin-6 production (GO:0032715)	1/31	0.144017	0.256173	0	0	6.69024	12.9645	SIRPA	GO_Biological_Process_2021	yellow
558	regulation of cellular component size (GO:0032535)	1/31	0.144017	0.256173	0	0	6.69024	12.9645	PTEN	GO_Biological_Process_2021	yellow
559	cardiac muscle cell action potential involved in contraction (GO:0086002)	1/31	0.144017	0.256173	0	0	6.69024	12.9645	SNTA1	GO_Biological_Process_2021	yellow
560	negative regulation of osteoblast differentiation (GO:0045668)	1/31	0.144017	0.256173	0	0	6.69024	12.9645	LRP5	GO_Biological_Process_2021	yellow
561	regulation of potassium ion transport (GO:0043266)	1/31	0.144017	0.256173	0	0	6.69024	12.9645	KCNIP3	GO_Biological_Process_2021	yellow
562	regulation of transmembrane receptor protein serine/threonine kinase signaling pathway (GO:0090092)	1/31	0.144017	0.256173	0	0	6.69024	12.9645	BCL9	GO_Biological_Process_2021	yellow
563	positive regulation of leukocyte cell-cell adhesion (GO:1903039)	1/31	0.144017	0.256173	0	0	6.69024	12.9645	SIRPA	GO_Biological_Process_2021	yellow
564	positive regulation of proteolysis involved in cellular protein catabolic process (GO:1903052)	1/31	0.144017	0.256173	0	0	6.69024	12.9645	PTEN	GO_Biological_Process_2021	yellow
565	positive regulation of ubiquitin-protein transferase activity (GO:0051443)	1/31	0.144017	0.256173	0	0	6.69024	12.9645	PTEN	GO_Biological_Process_2021	yellow
566	organic substance transport (GO:0071702)	2/136	0.14822	0.25921	0	0	3.01036	5.74694	ATP8A1;ABCA9	GO_Biological_Process_2021	yellow
567	ribonucleoprotein complex assembly (GO:0022618)	2/136	0.14822	0.25921	0	0	3.01036	5.74694	RBM5;LUC7L2	GO_Biological_Process_2021	yellow
568	aortic valve morphogenesis (GO:0003180)	1/32	0.148304	0.25921	0	0	6.4741	12.3558	ROCK2	GO_Biological_Process_2021	yellow
569	negative regulation of intracellular steroid hormone receptor signaling pathway (GO:0033144)	1/32	0.148304	0.25921	0	0	6.4741	12.3558	FOXP1	GO_Biological_Process_2021	yellow
570	regulation of cell morphogenesis (GO:0022604)	1/32	0.148304	0.25921	0	0	6.4741	12.3558	MYO9A	GO_Biological_Process_2021	yellow
571	establishment or maintenance of epithelial cell apical/basal polarity (GO:0045197)	1/32	0.148304	0.25921	0	0	6.4741	12.3558	MYO9A	GO_Biological_Process_2021	yellow
572	gene silencing by miRNA (GO:0035195)	1/32	0.148304	0.25921	0	0	6.4741	12.3558	TNRC6C	GO_Biological_Process_2021	yellow
573	superoxide metabolic process (GO:0006801)	1/32	0.148304	0.25921	0	0	6.4741	12.3558	SH3PXD2A	GO_Biological_Process_2021	yellow
574	positive regulation of telomere maintenance (GO:0032206)	1/32	0.148304	0.25921	0	0	6.4741	12.3558	TNKS	GO_Biological_Process_2021	yellow
575	modulation by host of symbiont process (GO:0051851)	1/32	0.148304	0.25921	0	0	6.4741	12.3558	TARDBP	GO_Biological_Process_2021	yellow
576	positive regulation of cell migration (GO:0030335)	3/269	0.151923	0.262555	0	0	2.28285	4.30176	TJP1;ROCK2;CLASP2	GO_Biological_Process_2021	yellow
577	negative regulation of JNK cascade (GO:0046329)	1/33	0.152569	0.262555	0	0	6.27146	11.7912	SIRPA	GO_Biological_Process_2021	yellow
578	negative regulation of smooth muscle cell proliferation (GO:0048662)	1/33	0.152569	0.262555	0	0	6.27146	11.7912	PTEN	GO_Biological_Process_2021	yellow
579	regulation of histone acetylation (GO:0035065)	1/33	0.152569	0.262555	0	0	6.27146	11.7912	CAMK1	GO_Biological_Process_2021	yellow
580	neuron projection extension (GO:1990138)	1/33	0.152569	0.262555	0	0	6.27146	11.7912	ULK2	GO_Biological_Process_2021	yellow
581	regulation of neurotransmitter secretion (GO:0046928)	1/33	0.152569	0.262555	0	0	6.27146	11.7912	MCTP1	GO_Biological_Process_2021	yellow
582	regulation of sprouting angiogenesis (GO:1903670)	1/33	0.152569	0.262555	0	0	6.27146	11.7912	TJP1	GO_Biological_Process_2021	yellow
583	positive regulation of histone modification (GO:0031058)	1/33	0.152569	0.262555	0	0	6.27146	11.7912	AKAP8L	GO_Biological_Process_2021	yellow
584	positive regulation of telomere maintenance via telomerase (GO:0032212)	1/33	0.152569	0.262555	0	0	6.27146	11.7912	TNKS	GO_Biological_Process_2021	yellow
585	regulation of cellular component organization (GO:0051128)	2/139	0.153424	0.263124	0	0	2.94399	5.51866	TJP1;ROCK2	GO_Biological_Process_2021	yellow
586	protein dephosphorylation (GO:0006470)	2/139	0.153424	0.263124	0	0	2.94399	5.51866	PTEN;PPM1H	GO_Biological_Process_2021	yellow
587	negative regulation of cellular process (GO:0048523)	5/566	0.153874	0.263446	0	0	1.81434	3.39575	ATP8A2;PTEN;SIRPA;PLXNA4;RBM5	GO_Biological_Process_2021	yellow
588	regulation of amyloid-beta formation (GO:1902003)	1/34	0.156813	0.264425	0	0	6.08111	11.2665	ROCK2	GO_Biological_Process_2021	yellow
589	B cell receptor signaling pathway (GO:0050853)	1/34	0.156813	0.264425	0	0	6.08111	11.2665	PRKCB	GO_Biological_Process_2021	yellow
590	regulation of keratinocyte differentiation (GO:0045616)	1/34	0.156813	0.264425	0	0	6.08111	11.2665	ROCK2	GO_Biological_Process_2021	yellow
591	organelle disassembly (GO:1903008)	1/34	0.156813	0.264425	0	0	6.08111	11.2665	ULK2	GO_Biological_Process_2021	yellow
592	organic cyclic compound biosynthetic process (GO:1901362)	1/34	0.156813	0.264425	0	0	6.08111	11.2665	GPHN	GO_Biological_Process_2021	yellow
593	phosphatidylinositol 3-kinase signaling (GO:0014065)	1/34	0.156813	0.264425	0	0	6.08111	11.2665	PTEN	GO_Biological_Process_2021	yellow
594	regulation of transmembrane transport (GO:0034762)	1/34	0.156813	0.264425	0	0	6.08111	11.2665	PRKCB	GO_Biological_Process_2021	yellow
595	positive regulation of telomerase activity (GO:0051973)	1/34	0.156813	0.264425	0	0	6.08111	11.2665	TNKS	GO_Biological_Process_2021	yellow
596	tRNA methylation (GO:0030488)	1/34	0.156813	0.264425	0	0	6.08111	11.2665	DALRD3	GO_Biological_Process_2021	yellow
597	neuron development (GO:0048666)	2/143	0.160417	0.266187	0	0	2.85989	5.23355	ATP8A2;PPP1R9A	GO_Biological_Process_2021	yellow
598	nitrogen compound transport (GO:0071705)	2/143	0.160417	0.266187	0	0	2.85989	5.23355	SLC7A8;LRRC8D	GO_Biological_Process_2021	yellow
599	negative regulation of cell cycle G1/S phase transition (GO:1902807)	1/35	0.161037	0.266187	0	0	5.90196	10.7777	PTEN	GO_Biological_Process_2021	yellow
600	negative regulation of epithelial cell migration (GO:0010633)	1/35	0.161037	0.266187	0	0	5.90196	10.7777	PTEN	GO_Biological_Process_2021	yellow
601	blood vessel diameter maintenance (GO:0097746)	1/35	0.161037	0.266187	0	0	5.90196	10.7777	ROCK2	GO_Biological_Process_2021	yellow
602	negative regulation of neurogenesis (GO:0050768)	1/35	0.161037	0.266187	0	0	5.90196	10.7777	PTEN	GO_Biological_Process_2021	yellow
603	cellular response to hydrogen peroxide (GO:0070301)	1/35	0.161037	0.266187	0	0	5.90196	10.7777	SIRPA	GO_Biological_Process_2021	yellow
604	regulation of muscle cell differentiation (GO:0051147)	1/35	0.161037	0.266187	0	0	5.90196	10.7777	CAMK1	GO_Biological_Process_2021	yellow
605	regulation of trans-synaptic signaling (GO:0099177)	1/35	0.161037	0.266187	0	0	5.90196	10.7777	LRRC4	GO_Biological_Process_2021	yellow
606	positive regulation of lymphocyte activation (GO:0051251)	1/35	0.161037	0.266187	0	0	5.90196	10.7777	SIRPA	GO_Biological_Process_2021	yellow
607	semaphorin-plexin signaling pathway (GO:0071526)	1/35	0.161037	0.266187	0	0	5.90196	10.7777	PLXNA4	GO_Biological_Process_2021	yellow
608	intracellular pH reduction (GO:0051452)	1/35	0.161037	0.266187	0	0	5.90196	10.7777	ATP6V0B	GO_Biological_Process_2021	yellow
609	negative regulation of cellular protein localization (GO:1903828)	1/36	0.165239	0.266985	0	0	5.73304	10.3216	ROCK2	GO_Biological_Process_2021	yellow
610	aortic valve development (GO:0003176)	1/36	0.165239	0.266985	0	0	5.73304	10.3216	ROCK2	GO_Biological_Process_2021	yellow
611	regulation of androgen receptor signaling pathway (GO:0060765)	1/36	0.165239	0.266985	0	0	5.73304	10.3216	FOXP1	GO_Biological_Process_2021	yellow
612	regulation of cell cycle G1/S phase transition (GO:1902806)	1/36	0.165239	0.266985	0	0	5.73304	10.3216	PTEN	GO_Biological_Process_2021	yellow
613	regulation of embryonic development (GO:0045995)	1/36	0.165239	0.266985	0	0	5.73304	10.3216	CLASP2	GO_Biological_Process_2021	yellow
614	dendrite morphogenesis (GO:0048813)	1/36	0.165239	0.266985	0	0	5.73304	10.3216	PTEN	GO_Biological_Process_2021	yellow
615	regulation of sodium ion transport (GO:0002028)	1/36	0.165239	0.266985	0	0	5.73304	10.3216	SNTA1	GO_Biological_Process_2021	yellow
616	positive regulation of mitotic nuclear division (GO:0045840)	1/36	0.165239	0.266985	0	0	5.73304	10.3216	LRP5	GO_Biological_Process_2021	yellow
617	intrinsic apoptotic signaling pathway by p53 class mediator (GO:0072332)	1/36	0.165239	0.266985	0	0	5.73304	10.3216	CDIP1	GO_Biological_Process_2021	yellow
618	macrophage activation (GO:0042116)	1/36	0.165239	0.266985	0	0	5.73304	10.3216	FOXP1	GO_Biological_Process_2021	yellow
619	membrane assembly (GO:0071709)	1/36	0.165239	0.266985	0	0	5.73304	10.3216	PTEN	GO_Biological_Process_2021	yellow
620	transferrin transport (GO:0033572)	1/36	0.165239	0.266985	0	0	5.73304	10.3216	ATP6V0B	GO_Biological_Process_2021	yellow
621	positive regulation of telomere maintenance via telomere lengthening (GO:1904358)	1/36	0.165239	0.266985	0	0	5.73304	10.3216	TNKS	GO_Biological_Process_2021	yellow
622	mitochondrion disassembly (GO:0061726)	1/36	0.165239	0.266985	0	0	5.73304	10.3216	ULK2	GO_Biological_Process_2021	yellow
623	regulation of actin cytoskeleton reorganization (GO:2000249)	1/37	0.16942	0.269837	0	0	5.57351	9.89507	TJP1	GO_Biological_Process_2021	yellow
624	negative regulation of G1/S transition of mitotic cell cycle (GO:2000134)	1/37	0.16942	0.269837	0	0	5.57351	9.89507	PTEN	GO_Biological_Process_2021	yellow
625	negative regulation of stress-activated MAPK cascade (GO:0032873)	1/37	0.16942	0.269837	0	0	5.57351	9.89507	SIRPA	GO_Biological_Process_2021	yellow
626	regulation of microtubule cytoskeleton organization (GO:0070507)	1/37	0.16942	0.269837	0	0	5.57351	9.89507	CLASP2	GO_Biological_Process_2021	yellow
627	phagosome maturation (GO:0090382)	1/37	0.16942	0.269837	0	0	5.57351	9.89507	ATP6V0B	GO_Biological_Process_2021	yellow
628	positive regulation of calcium ion transport (GO:0051928)	1/37	0.16942	0.269837	0	0	5.57351	9.89507	CACNB2	GO_Biological_Process_2021	yellow
629	positive regulation of cytokinesis (GO:0032467)	1/37	0.16942	0.269837	0	0	5.57351	9.89507	CSPP1	GO_Biological_Process_2021	yellow
630	regulation of vascular associated smooth muscle cell proliferation (GO:1904705)	1/37	0.16942	0.269837	0	0	5.57351	9.89507	PTEN	GO_Biological_Process_2021	yellow
631	positive regulation of exocytosis (GO:0045921)	1/37	0.16942	0.269837	0	0	5.57351	9.89507	CLASP2	GO_Biological_Process_2021	yellow
632	cellular response to organic cyclic compound (GO:0071407)	2/150	0.172791	0.274771	0	0	2.72366	4.78185	GNG2;ROCK2	GO_Biological_Process_2021	yellow
633	negative regulation of TOR signaling (GO:0032007)	1/38	0.173581	0.275155	0	0	5.4226	9.49559	FNIP1	GO_Biological_Process_2021	yellow
634	connective tissue development (GO:0061448)	1/38	0.173581	0.275155	0	0	5.4226	9.49559	LRP5	GO_Biological_Process_2021	yellow
635	actin filament organization (GO:0007015)	2/152	0.176356	0.278642	0	0	2.68707	4.66275	SPIRE1;PPP1R9A	GO_Biological_Process_2021	yellow
636	regulation of dendrite development (GO:0050773)	1/39	0.177721	0.278642	0	0	5.27964	9.1208	CSMD3	GO_Biological_Process_2021	yellow
637	regulation of heart rate by cardiac conduction (GO:0086091)	1/39	0.177721	0.278642	0	0	5.27964	9.1208	CACNB2	GO_Biological_Process_2021	yellow
638	organophosphate biosynthetic process (GO:0090407)	1/39	0.177721	0.278642	0	0	5.27964	9.1208	GPHN	GO_Biological_Process_2021	yellow
639	regulation of nitric-oxide synthase activity (GO:0050999)	1/39	0.177721	0.278642	0	0	5.27964	9.1208	NOS1AP	GO_Biological_Process_2021	yellow
640	phospholipid dephosphorylation (GO:0046839)	1/39	0.177721	0.278642	0	0	5.27964	9.1208	PTEN	GO_Biological_Process_2021	yellow
641	vesicle cytoskeletal trafficking (GO:0099518)	1/39	0.177721	0.278642	0	0	5.27964	9.1208	TANC2	GO_Biological_Process_2021	yellow
642	dephosphorylation (GO:0016311)	2/153	0.178143	0.278868	0	0	2.66914	4.60473	PTEN;PPM1H	GO_Biological_Process_2021	yellow
643	positive regulation of protein kinase activity (GO:0045860)	2/154	0.179932	0.28029	0	0	2.65145	4.5477	STRADA;CAMK1	GO_Biological_Process_2021	yellow
644	autophagy of mitochondrion (GO:0000422)	1/40	0.18184	0.28029	0	0	5.144	8.76861	ULK2	GO_Biological_Process_2021	yellow
645	bone development (GO:0060348)	1/40	0.18184	0.28029	0	0	5.144	8.76861	LRP5	GO_Biological_Process_2021	yellow
646	negative regulation of protein kinase B signaling (GO:0051898)	1/40	0.18184	0.28029	0	0	5.144	8.76861	PTEN	GO_Biological_Process_2021	yellow
647	nucleocytoplasmic transport (GO:0006913)	1/40	0.18184	0.28029	0	0	5.144	8.76861	BACH2	GO_Biological_Process_2021	yellow
648	organic hydroxy compound transport (GO:0015850)	1/40	0.18184	0.28029	0	0	5.144	8.76861	ABCC3	GO_Biological_Process_2021	yellow
649	regulation of sodium ion transmembrane transporter activity (GO:2000649)	1/40	0.18184	0.28029	0	0	5.144	8.76861	FGF13	GO_Biological_Process_2021	yellow
650	positive regulation of double-strand break repair (GO:2000781)	1/40	0.18184	0.28029	0	0	5.144	8.76861	SPIRE1	GO_Biological_Process_2021	yellow
651	stem cell differentiation (GO:0048863)	1/40	0.18184	0.28029	0	0	5.144	8.76861	FBXL17	GO_Biological_Process_2021	yellow
652	sulfur compound catabolic process (GO:0044273)	1/40	0.18184	0.28029	0	0	5.144	8.76861	HEXA	GO_Biological_Process_2021	yellow
653	mitotic spindle organization (GO:0007052)	2/157	0.185318	0.284861	0	0	2.59974	4.38233	TNKS;CLASP2	GO_Biological_Process_2021	yellow
654	nervous system development (GO:0007399)	4/447	0.185436	0.284861	0	0	1.83004	3.0837	PTEN;FBXL17;FGF13;RAPGEF5	GO_Biological_Process_2021	yellow
655	cortical cytoskeleton organization (GO:0030865)	1/41	0.185939	0.284861	0	0	5.01515	8.43717	ROCK2	GO_Biological_Process_2021	yellow
656	positive regulation of TOR signaling (GO:0032008)	1/41	0.185939	0.284861	0	0	5.01515	8.43717	FNIP1	GO_Biological_Process_2021	yellow
657	cellular response to starvation (GO:0009267)	2/158	0.187118	0.286231	0	0	2.58294	4.32905	ATP6V0B;FNIP1	GO_Biological_Process_2021	yellow
658	response to lipopolysaccharide (GO:0032496)	2/159	0.188921	0.28717	0	0	2.56636	4.27665	SIRPA;FOXP1	GO_Biological_Process_2021	yellow
659	regulation of chemokine production (GO:0032642)	1/42	0.190018	0.28717	0	0	4.89258	8.12481	FOXP1	GO_Biological_Process_2021	yellow
660	regulation of double-strand break repair (GO:2000779)	1/42	0.190018	0.28717	0	0	4.89258	8.12481	SPIRE1	GO_Biological_Process_2021	yellow
661	negative regulation of protein catabolic process (GO:0042177)	1/42	0.190018	0.28717	0	0	4.89258	8.12481	SNRNP70	GO_Biological_Process_2021	yellow
662	regulation of ubiquitin-dependent protein catabolic process (GO:2000058)	1/42	0.190018	0.28717	0	0	4.89258	8.12481	PTEN	GO_Biological_Process_2021	yellow
663	heterophilic cell-cell adhesion via plasma membrane cell adhesion molecules (GO:0007157)	1/42	0.190018	0.28717	0	0	4.89258	8.12481	CADM1	GO_Biological_Process_2021	yellow
664	histone H3 acetylation (GO:0043966)	1/42	0.190018	0.28717	0	0	4.89258	8.12481	PHF14	GO_Biological_Process_2021	yellow
665	skeletal system morphogenesis (GO:0048705)	1/42	0.190018	0.28717	0	0	4.89258	8.12481	LRP5	GO_Biological_Process_2021	yellow
666	anion transport (GO:0006820)	1/43	0.194076	0.290248	0	0	4.77585	7.83004	LRRC8D	GO_Biological_Process_2021	yellow
667	regulation of cell-cell adhesion (GO:0022407)	1/43	0.194076	0.290248	0	0	4.77585	7.83004	MAGI1	GO_Biological_Process_2021	yellow
668	regulation of cytokine production involved in inflammatory response (GO:1900015)	1/43	0.194076	0.290248	0	0	4.77585	7.83004	SIRPA	GO_Biological_Process_2021	yellow
669	cellular glucose homeostasis (GO:0001678)	1/43	0.194076	0.290248	0	0	4.77585	7.83004	LRRC8D	GO_Biological_Process_2021	yellow
670	negative regulation of type I interferon production (GO:0032480)	1/43	0.194076	0.290248	0	0	4.77585	7.83004	SIRPA	GO_Biological_Process_2021	yellow
671	positive regulation of axonogenesis (GO:0050772)	1/43	0.194076	0.290248	0	0	4.77585	7.83004	PLXNA4	GO_Biological_Process_2021	yellow
672	positive regulation of leukocyte mediated cytotoxicity (GO:0001912)	1/43	0.194076	0.290248	0	0	4.77585	7.83004	CADM1	GO_Biological_Process_2021	yellow
673	chemical synaptic transmission (GO:0007268)	3/306	0.197481	0.292371	0	0	2.00031	3.24472	CACNB2;PTEN;CAMK1	GO_Biological_Process_2021	yellow
674	branching morphogenesis of an epithelial tube (GO:0048754)	1/44	0.198114	0.292371	0	0	4.66455	7.55149	LRP5	GO_Biological_Process_2021	yellow
675	cation transmembrane transport (GO:0098655)	1/44	0.198114	0.292371	0	0	4.66455	7.55149	SLC7A8	GO_Biological_Process_2021	yellow
676	positive regulation of cell division (GO:0051781)	1/44	0.198114	0.292371	0	0	4.66455	7.55149	CSPP1	GO_Biological_Process_2021	yellow
677	positive regulation of osteoblast differentiation (GO:0045669)	1/44	0.198114	0.292371	0	0	4.66455	7.55149	LRP5	GO_Biological_Process_2021	yellow
678	positive regulation of stress fiber assembly (GO:0051496)	1/44	0.198114	0.292371	0	0	4.66455	7.55149	ROCK2	GO_Biological_Process_2021	yellow
679	metal ion homeostasis (GO:0055065)	1/44	0.198114	0.292371	0	0	4.66455	7.55149	SLC7A8	GO_Biological_Process_2021	yellow
680	mitotic spindle assembly (GO:0090307)	1/44	0.198114	0.292371	0	0	4.66455	7.55149	CLASP2	GO_Biological_Process_2021	yellow
681	mRNA stabilization (GO:0048255)	1/44	0.198114	0.292371	0	0	4.66455	7.55149	TARDBP	GO_Biological_Process_2021	yellow
682	regulation of insulin receptor signaling pathway (GO:0046626)	1/45	0.202133	0.296993	0	0	4.55831	7.28797	PRKCB	GO_Biological_Process_2021	yellow
683	chromosome condensation (GO:0030261)	1/45	0.202133	0.296993	0	0	4.55831	7.28797	AKAP8L	GO_Biological_Process_2021	yellow
684	zymogen activation (GO:0031638)	1/45	0.202133	0.296993	0	0	4.55831	7.28797	ASPH	GO_Biological_Process_2021	yellow
685	positive regulation of cellular process (GO:0048522)	5/625	0.203298	0.29827	0	0	1.63667	2.60735	TJP1;CSPP1;PTEN;LRP5;SIRPA	GO_Biological_Process_2021	yellow
686	negative regulation of tumor necrosis factor production (GO:0032720)	1/46	0.206131	0.30067	0	0	4.45679	7.03836	SIRPA	GO_Biological_Process_2021	yellow
687	regulation of telomerase activity (GO:0051972)	1/46	0.206131	0.30067	0	0	4.45679	7.03836	TNKS	GO_Biological_Process_2021	yellow
688	positive regulation of nucleocytoplasmic transport (GO:0046824)	1/46	0.206131	0.30067	0	0	4.45679	7.03836	CAMK1	GO_Biological_Process_2021	yellow
689	positive regulation of smooth muscle cell proliferation (GO:0048661)	1/46	0.206131	0.30067	0	0	4.45679	7.03836	FOXP1	GO_Biological_Process_2021	yellow
690	protein polyubiquitination (GO:0000209)	3/314	0.207747	0.302587	0	0	1.94806	3.06125	ZNRF1;TNKS;FBXL17	GO_Biological_Process_2021	yellow
691	cell-cell adhesion via plasma-membrane adhesion molecules (GO:0098742)	2/170	0.2089	0.303827	0	0	2.39699	3.75344	CADM1;LRRC4	GO_Biological_Process_2021	yellow
692	negative regulation of cold-induced thermogenesis (GO:0120163)	1/47	0.210109	0.303827	0	0	4.35968	6.80166	PLCL1	GO_Biological_Process_2021	yellow
693	epithelial to mesenchymal transition (GO:0001837)	1/47	0.210109	0.303827	0	0	4.35968	6.80166	ROCK2	GO_Biological_Process_2021	yellow
694	regulation of T cell activation (GO:0050863)	1/47	0.210109	0.303827	0	0	4.35968	6.80166	SIRPA	GO_Biological_Process_2021	yellow
695	glycosphingolipid metabolic process (GO:0006687)	1/47	0.210109	0.303827	0	0	4.35968	6.80166	HEXA	GO_Biological_Process_2021	yellow
696	neuron projection development (GO:0031175)	2/171	0.210728	0.304284	0	0	2.38268	3.71028	PTEN;PPP1R9A	GO_Biological_Process_2021	yellow
697	positive regulation of cell population proliferation (GO:0008284)	4/474	0.213099	0.306465	0	0	1.72252	2.66301	TJP1;PTEN;LRP5;FOXP1	GO_Biological_Process_2021	yellow
698	cellular response to alcohol (GO:0097306)	1/48	0.214068	0.306465	0	0	4.26671	6.57696	GNG2	GO_Biological_Process_2021	yellow
699	cellular response to interleukin-12 (GO:0071349)	1/48	0.214068	0.306465	0	0	4.26671	6.57696	SIRPA	GO_Biological_Process_2021	yellow
700	negative regulation of tumor necrosis factor superfamily cytokine production (GO:1903556)	1/48	0.214068	0.306465	0	0	4.26671	6.57696	SIRPA	GO_Biological_Process_2021	yellow
701	regulation of protein metabolic process (GO:0051246)	1/48	0.214068	0.306465	0	0	4.26671	6.57696	ROCK2	GO_Biological_Process_2021	yellow
702	positive regulation of DNA repair (GO:0045739)	1/48	0.214068	0.306465	0	0	4.26671	6.57696	SPIRE1	GO_Biological_Process_2021	yellow
703	cation transport (GO:0006812)	2/174	0.216222	0.308154	0	0	2.34077	3.58477	SLC7A8;FGF13	GO_Biological_Process_2021	yellow
704	aminoglycan biosynthetic process (GO:0006023)	1/49	0.218007	0.308154	0	0	4.17761	6.36345	HEXA	GO_Biological_Process_2021	yellow
705	regulation of cellular localization (GO:0060341)	1/49	0.218007	0.308154	0	0	4.17761	6.36345	LRP5	GO_Biological_Process_2021	yellow
706	regulation of interferon-beta production (GO:0032648)	1/49	0.218007	0.308154	0	0	4.17761	6.36345	SIRPA	GO_Biological_Process_2021	yellow
707	oligosaccharide metabolic process (GO:0009311)	1/49	0.218007	0.308154	0	0	4.17761	6.36345	ST3GAL3	GO_Biological_Process_2021	yellow
708	positive regulation of actin filament polymerization (GO:0030838)	1/49	0.218007	0.308154	0	0	4.17761	6.36345	SPIRE1	GO_Biological_Process_2021	yellow
709	regulation of smooth muscle cell proliferation (GO:0048660)	1/49	0.218007	0.308154	0	0	4.17761	6.36345	FOXP1	GO_Biological_Process_2021	yellow
710	response to hydrogen peroxide (GO:0042542)	1/49	0.218007	0.308154	0	0	4.17761	6.36345	SIRPA	GO_Biological_Process_2021	yellow
711	mitotic cytokinesis (GO:0000281)	1/49	0.218007	0.308154	0	0	4.17761	6.36345	ROCK2	GO_Biological_Process_2021	yellow
712	cellular response to oxygen-containing compound (GO:1901701)	3/323	0.219438	0.30974	0	0	1.8924	2.87017	GNG2;ROCK2;SIRPA	GO_Biological_Process_2021	yellow
713	glycerophospholipid biosynthetic process (GO:0046474)	2/177	0.221729	0.310636	0	0	2.30029	3.46493	INPP4B;PTEN	GO_Biological_Process_2021	yellow
714	actin polymerization or depolymerization (GO:0008154)	1/50	0.221927	0.310636	0	0	4.09215	6.16035	SPIRE1	GO_Biological_Process_2021	yellow
715	amino acid transport (GO:0006865)	1/50	0.221927	0.310636	0	0	4.09215	6.16035	SLC7A8	GO_Biological_Process_2021	yellow
716	neuron migration (GO:0001764)	1/50	0.221927	0.310636	0	0	4.09215	6.16035	FGF13	GO_Biological_Process_2021	yellow
717	positive regulation of ion transport (GO:0043270)	1/50	0.221927	0.310636	0	0	4.09215	6.16035	CACNB2	GO_Biological_Process_2021	yellow
718	iron ion transport (GO:0006826)	1/50	0.221927	0.310636	0	0	4.09215	6.16035	ATP6V0B	GO_Biological_Process_2021	yellow
719	blood circulation (GO:0008015)	1/51	0.225827	0.312182	0	0	4.0101	5.96697	ROCK2	GO_Biological_Process_2021	yellow
720	regulation of epithelial cell migration (GO:0010632)	1/51	0.225827	0.312182	0	0	4.0101	5.96697	CLASP2	GO_Biological_Process_2021	yellow
721	regulation of interleukin-12 production (GO:0032655)	1/51	0.225827	0.312182	0	0	4.0101	5.96697	FOXP1	GO_Biological_Process_2021	yellow
722	regulation of protein modification process (GO:0031399)	1/51	0.225827	0.312182	0	0	4.0101	5.96697	FNIP1	GO_Biological_Process_2021	yellow
723	positive regulation of actin filament bundle assembly (GO:0032233)	1/51	0.225827	0.312182	0	0	4.0101	5.96697	ROCK2	GO_Biological_Process_2021	yellow
724	regulation of smoothened signaling pathway (GO:0008589)	1/51	0.225827	0.312182	0	0	4.0101	5.96697	FBXL17	GO_Biological_Process_2021	yellow
725	positive regulation of fat cell differentiation (GO:0045600)	1/51	0.225827	0.312182	0	0	4.0101	5.96697	LRP5	GO_Biological_Process_2021	yellow
726	inositol lipid-mediated signaling (GO:0048017)	1/51	0.225827	0.312182	0	0	4.0101	5.96697	PLCL1	GO_Biological_Process_2021	yellow
727	intrinsic apoptotic signaling pathway in response to DNA damage (GO:0008630)	1/51	0.225827	0.312182	0	0	4.0101	5.96697	CDIP1	GO_Biological_Process_2021	yellow
728	regulation of exocytosis (GO:0017157)	1/52	0.229708	0.315809	0	0	3.93127	5.7827	CLASP2	GO_Biological_Process_2021	yellow
729	regulation of telomere maintenance via telomerase (GO:0032210)	1/52	0.229708	0.315809	0	0	3.93127	5.7827	TNKS	GO_Biological_Process_2021	yellow
730	glycolipid metabolic process (GO:0006664)	1/52	0.229708	0.315809	0	0	3.93127	5.7827	HEXA	GO_Biological_Process_2021	yellow
731	response to peptide hormone (GO:0043434)	1/52	0.229708	0.315809	0	0	3.93127	5.7827	ROCK2	GO_Biological_Process_2021	yellow
732	negative regulation of cysteine-type endopeptidase activity (GO:2000117)	1/53	0.233569	0.319805	0	0	3.85548	5.60693	FNIP1	GO_Biological_Process_2021	yellow
733	IRE1-mediated unfolded protein response (GO:0036498)	1/53	0.233569	0.319805	0	0	3.85548	5.60693	EXTL3	GO_Biological_Process_2021	yellow
734	positive regulation of phagocytosis (GO:0050766)	1/53	0.233569	0.319805	0	0	3.85548	5.60693	SIRPA	GO_Biological_Process_2021	yellow
735	positive regulation of cytokine production (GO:0001819)	3/335	0.235232	0.321644	0	0	1.82288	2.63804	CADM1;ROCK2;FOXP1	GO_Biological_Process_2021	yellow
736	regulation of alternative mRNA splicing, via spliceosome (GO:0000381)	1/54	0.237412	0.322431	0	0	3.78254	5.43914	RBM5	GO_Biological_Process_2021	yellow
737	regulation of megakaryocyte differentiation (GO:0045652)	1/54	0.237412	0.322431	0	0	3.78254	5.43914	TNRC6C	GO_Biological_Process_2021	yellow
738	cytoplasmic microtubule organization (GO:0031122)	1/54	0.237412	0.322431	0	0	3.78254	5.43914	TUBGCP5	GO_Biological_Process_2021	yellow
739	regulation of proteolysis (GO:0030162)	1/54	0.237412	0.322431	0	0	3.78254	5.43914	ASPH	GO_Biological_Process_2021	yellow
740	glycosaminoglycan metabolic process (GO:0030203)	1/54	0.237412	0.322431	0	0	3.78254	5.43914	HEXA	GO_Biological_Process_2021	yellow
741	negative regulation of cysteine-type endopeptidase activity involved in apoptotic process (GO:0043154)	1/55	0.241235	0.32674	0	0	3.71231	5.27884	FNIP1	GO_Biological_Process_2021	yellow
742	regulation of cardiac conduction (GO:1903779)	1/55	0.241235	0.32674	0	0	3.71231	5.27884	ASPH	GO_Biological_Process_2021	yellow
743	regulation of GTPase activity (GO:0043087)	2/189	0.243858	0.328791	0	0	2.15137	3.03595	RAPGEF6;PLXNA4	GO_Biological_Process_2021	yellow
744	autophagosome organization (GO:1905037)	1/56	0.245039	0.328791	0	0	3.64463	5.12558	ULK2	GO_Biological_Process_2021	yellow
745	blood vessel morphogenesis (GO:0048514)	1/56	0.245039	0.328791	0	0	3.64463	5.12558	LRP5	GO_Biological_Process_2021	yellow
746	negative regulation of metabolic process (GO:0009892)	1/56	0.245039	0.328791	0	0	3.64463	5.12558	PLCL1	GO_Biological_Process_2021	yellow
747	nuclear-transcribed mRNA catabolic process, deadenylation-dependent decay (GO:0000288)	1/56	0.245039	0.328791	0	0	3.64463	5.12558	CNOT3	GO_Biological_Process_2021	yellow
748	DNA damage response, signal transduction by p53 class mediator resulting in cell cycle arrest (GO:0006977)	1/56	0.245039	0.328791	0	0	3.64463	5.12558	CNOT3	GO_Biological_Process_2021	yellow
749	glycosaminoglycan catabolic process (GO:0006027)	1/56	0.245039	0.328791	0	0	3.64463	5.12558	HEXA	GO_Biological_Process_2021	yellow
750	negative regulation of cell differentiation (GO:0045596)	2/191	0.247558	0.331727	0	0	2.12839	2.97147	PTEN;LRP5	GO_Biological_Process_2021	yellow
751	regulation of mitotic nuclear division (GO:0007088)	1/57	0.248825	0.332096	0	0	3.57937	4.97892	LRP5	GO_Biological_Process_2021	yellow
752	positive regulation of proteolysis (GO:0045862)	1/57	0.248825	0.332096	0	0	3.57937	4.97892	ASPH	GO_Biological_Process_2021	yellow
753	protein K48-linked ubiquitination (GO:0070936)	1/57	0.248825	0.332096	0	0	3.57937	4.97892	ZNRF1	GO_Biological_Process_2021	yellow
754	autophagosome assembly (GO:0000045)	1/58	0.252591	0.335342	0	0	3.51639	4.8385	ULK2	GO_Biological_Process_2021	yellow
755	regulation of calcium ion transport (GO:0051924)	1/58	0.252591	0.335342	0	0	3.51639	4.8385	CACNB2	GO_Biological_Process_2021	yellow
756	regulation of phagocytosis (GO:0050764)	1/58	0.252591	0.335342	0	0	3.51639	4.8385	SIRPA	GO_Biological_Process_2021	yellow
757	positive regulation of mitochondrion organization (GO:0010822)	1/58	0.252591	0.335342	0	0	3.51639	4.8385	SPIRE1	GO_Biological_Process_2021	yellow
758	negative regulation of autophagy (GO:0010507)	1/59	0.256339	0.338975	0	0	3.45559	4.70394	SNRNP70	GO_Biological_Process_2021	yellow
759	regulation of secretion by cell (GO:1903530)	1/59	0.256339	0.338975	0	0	3.45559	4.70394	MCTP1	GO_Biological_Process_2021	yellow
760	selective autophagy (GO:0061912)	1/59	0.256339	0.338975	0	0	3.45559	4.70394	ULK2	GO_Biological_Process_2021	yellow
761	Notch signaling pathway (GO:0007219)	1/60	0.260068	0.343004	0	0	3.39685	4.57491	DTX4	GO_Biological_Process_2021	yellow
762	homophilic cell adhesion via plasma membrane adhesion molecules (GO:0007156)	1/60	0.260068	0.343004	0	0	3.39685	4.57491	CADM1	GO_Biological_Process_2021	yellow
763	negative regulation of intracellular signal transduction (GO:1902532)	2/198	0.260521	0.34315	0	0	2.05165	2.75961	PTEN;FNIP1	GO_Biological_Process_2021	yellow
764	B cell differentiation (GO:0030183)	1/61	0.263779	0.34518	0	0	3.34007	4.45112	FNIP1	GO_Biological_Process_2021	yellow
765	regulation of endocytosis (GO:0030100)	1/61	0.263779	0.34518	0	0	3.34007	4.45112	MCTP1	GO_Biological_Process_2021	yellow
766	negative regulation of response to stimulus (GO:0048585)	1/61	0.263779	0.34518	0	0	3.34007	4.45112	MCTP1	GO_Biological_Process_2021	yellow
767	O-glycan processing (GO:0016266)	1/61	0.263779	0.34518	0	0	3.34007	4.45112	ST3GAL3	GO_Biological_Process_2021	yellow
768	positive regulation of DNA biosynthetic process (GO:2000573)	1/61	0.263779	0.34518	0	0	3.34007	4.45112	TNKS	GO_Biological_Process_2021	yellow
769	double-strand break repair via nonhomologous end joining (GO:0006303)	1/62	0.267472	0.348198	0	0	3.28515	4.33226	IFFO1	GO_Biological_Process_2021	yellow
770	positive regulation of cysteine-type endopeptidase activity (GO:2001056)	1/62	0.267472	0.348198	0	0	3.28515	4.33226	ASPH	GO_Biological_Process_2021	yellow
771	glucose metabolic process (GO:0006006)	1/62	0.267472	0.348198	0	0	3.28515	4.33226	LRP5	GO_Biological_Process_2021	yellow
772	I-kappaB kinase/NF-kappaB signaling (GO:0007249)	1/62	0.267472	0.348198	0	0	3.28515	4.33226	ROCK2	GO_Biological_Process_2021	yellow
773	protein ubiquitination (GO:0016567)	4/525	0.268113	0.348582	0	0	1.54982	2.04011	ZNRF1;TNKS;FBXL17;DTX4	GO_Biological_Process_2021	yellow
774	regulation of angiogenesis (GO:0045765)	2/203	0.269787	0.350305	0	0	2.0001	2.62038	PRKCB;ROCK2	GO_Biological_Process_2021	yellow
775	anterior/posterior pattern specification (GO:0009952)	1/63	0.271146	0.350709	0	0	3.232	4.21808	LRP5	GO_Biological_Process_2021	yellow
776	cellular response to reactive oxygen species (GO:0034614)	1/63	0.271146	0.350709	0	0	3.232	4.21808	SIRPA	GO_Biological_Process_2021	yellow
777	organonitrogen compound catabolic process (GO:1901565)	1/63	0.271146	0.350709	0	0	3.232	4.21808	GGACT	GO_Biological_Process_2021	yellow
778	proteasomal protein catabolic process (GO:0010498)	2/205	0.273494	0.353292	0	0	1.9802	2.56728	ZNRF1;FBXL17	GO_Biological_Process_2021	yellow
779	regulation of inflammatory response (GO:0050727)	2/206	0.275347	0.355229	0	0	1.97039	2.54126	SIRPA;FOXP1	GO_Biological_Process_2021	yellow
780	regulation of cell-matrix adhesion (GO:0001952)	1/65	0.278439	0.358299	0	0	3.13068	4.00275	ROCK2	GO_Biological_Process_2021	yellow
781	mitotic G1 DNA damage checkpoint signaling (GO:0031571)	1/65	0.278439	0.358299	0	0	3.13068	4.00275	CNOT3	GO_Biological_Process_2021	yellow
782	mitotic cell cycle phase transition (GO:0044772)	2/209	0.280905	0.361009	0	0	1.94154	2.46525	FBXL17;CLASP2	GO_Biological_Process_2021	yellow
783	cell-cell junction assembly (GO:0007043)	1/66	0.282059	0.361107	0	0	3.08236	3.90116	TJP1	GO_Biological_Process_2021	yellow
784	cellular response to nutrient levels (GO:0031669)	1/66	0.282059	0.361107	0	0	3.08236	3.90116	FNIP1	GO_Biological_Process_2021	yellow
785	regulation of protein localization (GO:0032880)	1/66	0.282059	0.361107	0	0	3.08236	3.90116	CAMK1	GO_Biological_Process_2021	yellow
786	positive regulation of protein phosphorylation (GO:0001934)	3/371	0.283659	0.362694	0	0	1.64153	2.0683	ROCK2;CAMK1;FNIP1	GO_Biological_Process_2021	yellow
787	vascular endothelial growth factor receptor signaling pathway (GO:0048010)	1/67	0.28566	0.364788	0	0	3.03551	3.80335	ROCK2	GO_Biological_Process_2021	yellow
788	negative regulation of inflammatory response (GO:0050728)	2/212	0.28646	0.364882	0	0	1.91351	2.39219	GNG2;SIRPA	GO_Biological_Process_2021	yellow
789	phosphate-containing compound metabolic process (GO:0006796)	2/212	0.28646	0.364882	0	0	1.91351	2.39219	INPP4B;PTEN	GO_Biological_Process_2021	yellow
790	positive regulation of intracellular signal transduction (GO:1902533)	4/546	0.291516	0.370853	0	0	1.48816	1.8344	PRKCB;ROCK2;NOS1AP;FNIP1	GO_Biological_Process_2021	yellow
791	extracellular structure organization (GO:0043062)	2/216	0.29386	0.373362	0	0	1.87736	2.29911	COL27A1;SH3PXD2A	GO_Biological_Process_2021	yellow
792	negative regulation of cell population proliferation (GO:0008285)	3/379	0.294563	0.373782	0	0	1.60594	1.96289	ATP8A2;PTEN;RBM5	GO_Biological_Process_2021	yellow
793	external encapsulating structure organization (GO:0045229)	2/217	0.295709	0.374764	0	0	1.86853	2.27658	COL27A1;SH3PXD2A	GO_Biological_Process_2021	yellow
794	cellular response to lipid (GO:0071396)	2/219	0.299405	0.376735	0	0	1.85112	2.23238	ROCK2;SIRPA	GO_Biological_Process_2021	yellow
795	regulation of G1/S transition of mitotic cell cycle (GO:2000045)	1/71	0.299888	0.376735	0	0	2.86147	3.4462	PTEN	GO_Biological_Process_2021	yellow
796	cholesterol homeostasis (GO:0042632)	1/71	0.299888	0.376735	0	0	2.86147	3.4462	LRP5	GO_Biological_Process_2021	yellow
797	nucleic acid metabolic process (GO:0090304)	1/71	0.299888	0.376735	0	0	2.86147	3.4462	HNRNPH1	GO_Biological_Process_2021	yellow
798	regulation of TOR signaling (GO:0032006)	1/71	0.299888	0.376735	0	0	2.86147	3.4462	FNIP1	GO_Biological_Process_2021	yellow
799	response to metal ion (GO:0010038)	1/71	0.299888	0.376735	0	0	2.86147	3.4462	GPHN	GO_Biological_Process_2021	yellow
800	myeloid leukocyte differentiation (GO:0002573)	1/71	0.299888	0.376735	0	0	2.86147	3.4462	FOXP1	GO_Biological_Process_2021	yellow
801	positive regulation of cell motility (GO:2000147)	2/221	0.303097	0.379252	0	0	1.83403	2.18929	TJP1;ROCK2	GO_Biological_Process_2021	yellow
802	positive regulation of neurogenesis (GO:0050769)	1/72	0.303401	0.379252	0	0	2.82103	3.36463	PLXNA4	GO_Biological_Process_2021	yellow
803	sterol homeostasis (GO:0055092)	1/72	0.303401	0.379252	0	0	2.82103	3.36463	LRP5	GO_Biological_Process_2021	yellow
804	positive regulation of secretion by cell (GO:1903532)	1/72	0.303401	0.379252	0	0	2.82103	3.36463	CLASP2	GO_Biological_Process_2021	yellow
805	negative regulation of cell adhesion (GO:0007162)	1/73	0.306897	0.381722	0	0	2.78171	3.28587	PLXNA4	GO_Biological_Process_2021	yellow
806	regulation of actin filament-based process (GO:0032970)	1/73	0.306897	0.381722	0	0	2.78171	3.28587	ROCK2	GO_Biological_Process_2021	yellow
807	response to molecule of bacterial origin (GO:0002237)	1/73	0.306897	0.381722	0	0	2.78171	3.28587	FOXP1	GO_Biological_Process_2021	yellow
808	insulin receptor signaling pathway (GO:0008286)	1/73	0.306897	0.381722	0	0	2.78171	3.28587	ATP6V0B	GO_Biological_Process_2021	yellow
809	proteolysis involved in cellular protein catabolic process (GO:0051603)	1/74	0.310375	0.383674	0	0	2.74346	3.20978	FBXL17	GO_Biological_Process_2021	yellow
810	negative regulation of protein binding (GO:0032091)	1/74	0.310375	0.383674	0	0	2.74346	3.20978	CAMK1	GO_Biological_Process_2021	yellow
811	cellular response to amino acid starvation (GO:0034198)	1/74	0.310375	0.383674	0	0	2.74346	3.20978	ATP6V0B	GO_Biological_Process_2021	yellow
812	DNA damage response, signal transduction by p53 class mediator (GO:0030330)	1/74	0.310375	0.383674	0	0	2.74346	3.20978	CNOT3	GO_Biological_Process_2021	yellow
813	mitotic nuclear division (GO:0140014)	1/74	0.310375	0.383674	0	0	2.74346	3.20978	CLASP2	GO_Biological_Process_2021	yellow
814	fibroblast growth factor receptor signaling pathway (GO:0008543)	1/75	0.313836	0.386526	0	0	2.70625	3.13623	HNRNPH1	GO_Biological_Process_2021	yellow
815	response to amino acid starvation (GO:1990928)	1/75	0.313836	0.386526	0	0	2.70625	3.13623	ATP6V0B	GO_Biological_Process_2021	yellow
816	positive regulation of T cell activation (GO:0050870)	1/75	0.313836	0.386526	0	0	2.70625	3.13623	SIRPA	GO_Biological_Process_2021	yellow
817	regulation of cell division (GO:0051302)	1/76	0.31728	0.390289	0	0	2.67003	3.06512	CSPP1	GO_Biological_Process_2021	yellow
818	negative regulation of developmental process (GO:0051093)	1/77	0.320707	0.393541	0	0	2.63477	2.99634	ROCK2	GO_Biological_Process_2021	yellow
819	import into nucleus (GO:0051170)	1/77	0.320707	0.393541	0	0	2.63477	2.99634	BACH2	GO_Biological_Process_2021	yellow
820	negative regulation of blood vessel morphogenesis (GO:2000181)	1/78	0.324116	0.39724	0	0	2.60042	2.92977	ROCK2	GO_Biological_Process_2021	yellow
821	axon development (GO:0061564)	1/79	0.327509	0.400421	0	0	2.56695	2.86534	RTN4RL1	GO_Biological_Process_2021	yellow
822	positive regulation of proteasomal ubiquitin-dependent protein catabolic process (GO:0032436)	1/79	0.327509	0.400421	0	0	2.56695	2.86534	RNF180	GO_Biological_Process_2021	yellow
823	transmembrane receptor protein tyrosine kinase signaling pathway (GO:0007169)	3/404	0.328781	0.401133	0	0	1.50389	1.67288	ATP6V0B;HNRNPH1;ROCK2	GO_Biological_Process_2021	yellow
824	negative regulation of cell cycle (GO:0045786)	1/80	0.330885	0.401133	0	0	2.53433	2.80293	PTEN	GO_Biological_Process_2021	yellow
825	negative regulation of cellular component organization (GO:0051129)	1/80	0.330885	0.401133	0	0	2.53433	2.80293	MCTP1	GO_Biological_Process_2021	yellow
826	regulation of fat cell differentiation (GO:0045598)	1/80	0.330885	0.401133	0	0	2.53433	2.80293	LRP5	GO_Biological_Process_2021	yellow
827	regulation of organelle organization (GO:0033043)	1/80	0.330885	0.401133	0	0	2.53433	2.80293	TJP1	GO_Biological_Process_2021	yellow
828	positive regulation of cell adhesion (GO:0045785)	1/80	0.330885	0.401133	0	0	2.53433	2.80293	MAGI1	GO_Biological_Process_2021	yellow
829	response to interferon-gamma (GO:0034341)	1/80	0.330885	0.401133	0	0	2.53433	2.80293	SIRPA	GO_Biological_Process_2021	yellow
830	positive regulation of cellular amide metabolic process (GO:0034250)	1/81	0.334244	0.404329	0	0	2.50253	2.74248	ROCK2	GO_Biological_Process_2021	yellow
831	regulation of ERK1 and ERK2 cascade (GO:0070372)	2/238	0.334326	0.404329	0	0	1.70045	1.86308	PTEN;SIRPA	GO_Biological_Process_2021	yellow
832	regulation of cell population proliferation (GO:0042127)	5/764	0.335221	0.404925	0	0	1.3273	1.45069	TJP1;ATP8A2;PTEN;LRP5;RBM5	GO_Biological_Process_2021	yellow
833	regulation of cyclin-dependent protein serine/threonine kinase activity (GO:0000079)	1/82	0.337586	0.4063	0	0	2.47151	2.6839	PTEN	GO_Biological_Process_2021	yellow
834	regulation of G protein-coupled receptor signaling pathway (GO:0008277)	1/82	0.337586	0.4063	0	0	2.47151	2.6839	ROCK2	GO_Biological_Process_2021	yellow
835	ephrin receptor signaling pathway (GO:0048013)	1/82	0.337586	0.4063	0	0	2.47151	2.6839	ROCK2	GO_Biological_Process_2021	yellow
836	axonogenesis (GO:0007409)	2/240	0.337977	0.4063	0	0	1.68599	1.82892	PTEN;ULK2	GO_Biological_Process_2021	yellow
837	regulation of defense response (GO:0031347)	1/83	0.340912	0.408362	0	0	2.44124	2.6271	FOXP1	GO_Biological_Process_2021	yellow
838	regulation of osteoblast differentiation (GO:0045667)	1/83	0.340912	0.408362	0	0	2.44124	2.6271	LRP5	GO_Biological_Process_2021	yellow
839	glycoprotein biosynthetic process (GO:0009101)	1/83	0.340912	0.408362	0	0	2.44124	2.6271	ST3GAL3	GO_Biological_Process_2021	yellow
840	regulation of cytokinesis (GO:0032465)	1/84	0.344221	0.411346	0	0	2.41171	2.57202	CSPP1	GO_Biological_Process_2021	yellow
841	nuclear export (GO:0051168)	1/84	0.344221	0.411346	0	0	2.41171	2.57202	STRADA	GO_Biological_Process_2021	yellow
842	anterograde trans-synaptic signaling (GO:0098916)	2/244	0.345261	0.412099	0	0	1.65778	1.76298	CACNB2;CAMK1	GO_Biological_Process_2021	yellow
843	negative regulation of defense response (GO:0031348)	1/85	0.347513	0.413805	0	0	2.38288	2.51859	SIRPA	GO_Biological_Process_2021	yellow
844	B cell activation (GO:0042113)	1/85	0.347513	0.413805	0	0	2.38288	2.51859	PRKCB	GO_Biological_Process_2021	yellow
845	positive regulation of DNA-binding transcription factor activity (GO:0051091)	2/246	0.348893	0.414956	0	0	1.64403	1.73114	PRKCB;PTEN	GO_Biological_Process_2021	yellow
846	regulation of interferon-gamma production (GO:0032649)	1/86	0.35079	0.415246	0	0	2.35472	2.46673	SIRPA	GO_Biological_Process_2021	yellow
847	glucose homeostasis (GO:0042593)	1/86	0.35079	0.415246	0	0	2.35472	2.46673	LRRC8D	GO_Biological_Process_2021	yellow
848	response to interleukin-1 (GO:0070555)	1/86	0.35079	0.415246	0	0	2.35472	2.46673	SIRPA	GO_Biological_Process_2021	yellow
849	positive regulation of proteasomal protein catabolic process (GO:1901800)	1/86	0.35079	0.415246	0	0	2.35472	2.46673	RNF180	GO_Biological_Process_2021	yellow
850	negative regulation of angiogenesis (GO:0016525)	1/87	0.35405	0.417629	0	0	2.32723	2.4164	ROCK2	GO_Biological_Process_2021	yellow
851	calcium ion transmembrane transport (GO:0070588)	1/87	0.35405	0.417629	0	0	2.32723	2.4164	SLC24A3	GO_Biological_Process_2021	yellow
852	sodium ion transmembrane transport (GO:0035725)	1/87	0.35405	0.417629	0	0	2.32723	2.4164	SLC24A3	GO_Biological_Process_2021	yellow
853	negative regulation of binding (GO:0051100)	1/88	0.357294	0.420264	0	0	2.30036	2.36752	CAMK1	GO_Biological_Process_2021	yellow
854	positive regulation of neuron projection development (GO:0010976)	1/88	0.357294	0.420264	0	0	2.30036	2.36752	CAMK1	GO_Biological_Process_2021	yellow
855	organelle assembly (GO:0070925)	3/425	0.357538	0.420264	0	0	1.42752	1.46822	TNKS;TUBGCP5;ULK2	GO_Biological_Process_2021	yellow
856	positive regulation of signal transduction (GO:0009967)	2/252	0.359751	0.421307	0	0	1.60408	1.63992	PRKCB;PTEN	GO_Biological_Process_2021	yellow
857	regulation of cysteine-type endopeptidase activity involved in apoptotic process (GO:0043281)	1/89	0.360521	0.421307	0	0	2.2741	2.32005	FNIP1	GO_Biological_Process_2021	yellow
858	collagen fibril organization (GO:0030199)	1/89	0.360521	0.421307	0	0	2.2741	2.32005	COL27A1	GO_Biological_Process_2021	yellow
859	regulation of type I interferon production (GO:0032479)	1/89	0.360521	0.421307	0	0	2.2741	2.32005	DTX4	GO_Biological_Process_2021	yellow
860	SCF-dependent proteasomal ubiquitin-dependent protein catabolic process (GO:0031146)	1/89	0.360521	0.421307	0	0	2.2741	2.32005	FBXL17	GO_Biological_Process_2021	yellow
861	positive regulation of phosphorylation (GO:0042327)	2/253	0.361554	0.422024	0	0	1.59761	1.62532	ROCK2;FNIP1	GO_Biological_Process_2021	yellow
862	negative regulation of protein kinase activity (GO:0006469)	1/90	0.363733	0.422115	0	0	2.24844	2.27393	LRP5	GO_Biological_Process_2021	yellow
863	negative regulation of translation (GO:0017148)	1/90	0.363733	0.422115	0	0	2.24844	2.27393	ROCK2	GO_Biological_Process_2021	yellow
864	regulation of mRNA splicing, via spliceosome (GO:0048024)	1/90	0.363733	0.422115	0	0	2.24844	2.27393	RBM5	GO_Biological_Process_2021	yellow
865	mitochondrial respiratory chain complex assembly (GO:0033108)	1/90	0.363733	0.422115	0	0	2.24844	2.27393	COX16	GO_Biological_Process_2021	yellow
866	protein complex oligomerization (GO:0051259)	1/90	0.363733	0.422115	0	0	2.24844	2.27393	LRRC8D	GO_Biological_Process_2021	yellow
867	regulation of actin cytoskeleton organization (GO:0032956)	1/91	0.366929	0.424843	0	0	2.22334	2.2291	ROCK2	GO_Biological_Process_2021	yellow
868	positive regulation of transport (GO:0051050)	1/91	0.366929	0.424843	0	0	2.22334	2.2291	SIRPA	GO_Biological_Process_2021	yellow
869	negative regulation of mitotic cell cycle phase transition (GO:1901991)	1/92	0.370109	0.427048	0	0	2.1988	2.18552	PTEN	GO_Biological_Process_2021	yellow
870	cellular response to fibroblast growth factor stimulus (GO:0044344)	1/92	0.370109	0.427048	0	0	2.1988	2.18552	HNRNPH1	GO_Biological_Process_2021	yellow
871	positive regulation of cellular component biogenesis (GO:0044089)	1/92	0.370109	0.427048	0	0	2.1988	2.18552	FNIP1	GO_Biological_Process_2021	yellow
872	positive regulation of cell differentiation (GO:0045597)	2/258	0.370544	0.42706	0	0	1.56601	1.55471	LRP5;CAMK1	GO_Biological_Process_2021	yellow
873	regulation of heart contraction (GO:0008016)	1/93	0.373273	0.429221	0	0	2.17479	2.14314	ASPH	GO_Biological_Process_2021	yellow
874	visual perception (GO:0007601)	1/93	0.373273	0.429221	0	0	2.17479	2.14314	MYO9A	GO_Biological_Process_2021	yellow
875	cellular component assembly (GO:0022607)	2/261	0.375914	0.431764	0	0	1.54763	1.51419	MAGI1;MYO9A	GO_Biological_Process_2021	yellow
876	sensory perception of light stimulus (GO:0050953)	1/95	0.379554	0.43495	0	0	2.1283	2.06182	MYO9A	GO_Biological_Process_2021	yellow
877	mRNA metabolic process (GO:0016071)	1/95	0.379554	0.43495	0	0	2.1283	2.06182	AKAP8L	GO_Biological_Process_2021	yellow
878	calcium ion homeostasis (GO:0055074)	1/97	0.385772	0.441013	0	0	2.08375	1.98479	SLC24A3	GO_Biological_Process_2021	yellow
879	positive regulation of cold-induced thermogenesis (GO:0120162)	1/97	0.385772	0.441013	0	0	2.08375	1.98479	CNOT3	GO_Biological_Process_2021	yellow
880	protein-containing complex assembly (GO:0065003)	2/267	0.386599	0.441013	0	0	1.51213	1.43708	MAGI1;BCL9	GO_Biological_Process_2021	yellow
881	negative regulation of signal transduction (GO:0009968)	2/267	0.386599	0.441013	0	0	1.51213	1.43708	PRKCB;PTEN	GO_Biological_Process_2021	yellow
882	RNA splicing (GO:0008380)	1/98	0.388858	0.443087	0	0	2.06217	1.9478	TARDBP	GO_Biological_Process_2021	yellow
883	regulation of transforming growth factor beta receptor signaling pathway (GO:0017015)	1/100	0.394984	0.449558	0	0	2.0203	1.87668	BCL9	GO_Biological_Process_2021	yellow
884	cellular response to chemical stress (GO:0062197)	1/101	0.398025	0.452505	0	0	2	1.84248	LRRC8D	GO_Biological_Process_2021	yellow
885	protein O-linked glycosylation (GO:0006493)	1/102	0.40105	0.45338	0	0	1.9801	1.80916	ST3GAL3	GO_Biological_Process_2021	yellow
886	regulation of proteasomal ubiquitin-dependent protein catabolic process (GO:0032434)	1/102	0.40105	0.45338	0	0	1.9801	1.80916	RNF180	GO_Biological_Process_2021	yellow
887	positive regulation of cellular protein metabolic process (GO:0032270)	1/102	0.40105	0.45338	0	0	1.9801	1.80916	ASPH	GO_Biological_Process_2021	yellow
888	positive regulation of vasculature development (GO:1904018)	1/102	0.40105	0.45338	0	0	1.9801	1.80916	PRKCB	GO_Biological_Process_2021	yellow
889	mitotic sister chromatid segregation (GO:0000070)	1/102	0.40105	0.45338	0	0	1.9801	1.80916	AKAP8L	GO_Biological_Process_2021	yellow
890	cellular metal ion homeostasis (GO:0006875)	1/104	0.407055	0.459136	0	0	1.94145	1.74499	SLC24A3	GO_Biological_Process_2021	yellow
891	regulation of insulin secretion (GO:0050796)	1/104	0.407055	0.459136	0	0	1.94145	1.74499	LRP5	GO_Biological_Process_2021	yellow
892	regulation of JNK cascade (GO:0046328)	1/105	0.410035	0.461979	0	0	1.92269	1.7141	SIRPA	GO_Biological_Process_2021	yellow
893	regulation of phosphatidylinositol 3-kinase signaling (GO:0014066)	1/106	0.413001	0.464279	0	0	1.90428	1.68397	PTEN	GO_Biological_Process_2021	yellow
894	positive regulation of protein serine/threonine kinase activity (GO:0071902)	1/106	0.413001	0.464279	0	0	1.90428	1.68397	CAMK1	GO_Biological_Process_2021	yellow
895	positive regulation of programmed cell death (GO:0043068)	2/286	0.419896	0.471504	0	0	1.4096	1.22318	ARHGEF1;RBM5	GO_Biological_Process_2021	yellow
896	regulation of interleukin-6 production (GO:0032675)	1/110	0.424715	0.476383	0	0	1.83403	1.57054	SIRPA	GO_Biological_Process_2021	yellow
897	cellular divalent inorganic cation homeostasis (GO:0072503)	1/111	0.427608	0.479092	0	0	1.81726	1.54385	SLC24A3	GO_Biological_Process_2021	yellow
898	protein-containing complex subunit organization (GO:0043933)	1/112	0.430486	0.481244	0	0	1.8008	1.51779	MAGI1	GO_Biological_Process_2021	yellow
899	regulation of macroautophagy (GO:0016241)	1/112	0.430486	0.481244	0	0	1.8008	1.51779	ATP6V0B	GO_Biological_Process_2021	yellow
900	positive regulation of metabolic process (GO:0009893)	1/113	0.433349	0.48337	0	0	1.78463	1.49233	CNOT3	GO_Biological_Process_2021	yellow
901	sulfur compound biosynthetic process (GO:0044272)	1/113	0.433349	0.48337	0	0	1.78463	1.49233	ST3GAL3	GO_Biological_Process_2021	yellow
902	activation of protein kinase activity (GO:0032147)	1/114	0.436199	0.48547	0	0	1.76875	1.46746	STRADA	GO_Biological_Process_2021	yellow
903	response to lipid (GO:0033993)	1/114	0.436199	0.48547	0	0	1.76875	1.46746	FOXP1	GO_Biological_Process_2021	yellow
904	regulation of cell cycle (GO:0051726)	2/296	0.437059	0.485889	0	0	1.36096	1.12645	FBXL17;TARDBP	GO_Biological_Process_2021	yellow
905	cellular response to molecule of bacterial origin (GO:0071219)	1/115	0.439034	0.487008	0	0	1.75315	1.44315	SIRPA	GO_Biological_Process_2021	yellow
906	positive regulation of protein metabolic process (GO:0051247)	1/115	0.439034	0.487008	0	0	1.75315	1.44315	ROCK2	GO_Biological_Process_2021	yellow
907	regulation of protein-containing complex assembly (GO:0043254)	1/116	0.441855	0.487982	0	0	1.73781	1.4194	FNIP1	GO_Biological_Process_2021	yellow
908	ion transport (GO:0006811)	1/116	0.441855	0.487982	0	0	1.73781	1.4194	SLC24A3	GO_Biological_Process_2021	yellow
909	sphingolipid metabolic process (GO:0006665)	1/116	0.441855	0.487982	0	0	1.73781	1.4194	HEXA	GO_Biological_Process_2021	yellow
910	tumor necrosis factor-mediated signaling pathway (GO:0033209)	1/116	0.441855	0.487982	0	0	1.73781	1.4194	CDIP1	GO_Biological_Process_2021	yellow
911	extracellular matrix organization (GO:0030198)	2/300	0.443848	0.489646	0	0	1.34242	1.09041	COL27A1;SH3PXD2A	GO_Biological_Process_2021	yellow
912	adenylate cyclase-activating G protein-coupled receptor signaling pathway (GO:0007189)	1/118	0.447455	0.491467	0	0	1.70793	1.37349	GNG2	GO_Biological_Process_2021	yellow
913	regulation of cellular response to stress (GO:0080135)	1/118	0.447455	0.491467	0	0	1.70793	1.37349	ROCK2	GO_Biological_Process_2021	yellow
914	regulation of protein binding (GO:0043393)	1/118	0.447455	0.491467	0	0	1.70793	1.37349	CAMK1	GO_Biological_Process_2021	yellow
915	positive regulation of protein-containing complex assembly (GO:0031334)	1/118	0.447455	0.491467	0	0	1.70793	1.37349	FNIP1	GO_Biological_Process_2021	yellow
916	cellular response to lipopolysaccharide (GO:0071222)	1/120	0.452999	0.497013	0	0	1.67906	1.32959	SIRPA	GO_Biological_Process_2021	yellow
917	cellular response to interferon-gamma (GO:0071346)	1/121	0.455751	0.499487	0	0	1.66498	1.30836	SIRPA	GO_Biological_Process_2021	yellow
918	potassium ion transport (GO:0006813)	1/122	0.458489	0.50194	0	0	1.65114	1.28759	SLC24A3	GO_Biological_Process_2021	yellow
919	positive regulation of apoptotic process (GO:0043065)	2/310	0.460624	0.503729	0	0	1.29817	1.00631	ARHGEF1;RBM5	GO_Biological_Process_2021	yellow
920	defense response to symbiont (GO:0140546)	1/124	0.463923	0.506786	0	0	1.62413	1.24739	SERINC3	GO_Biological_Process_2021	yellow
921	regulation of phosphorylation (GO:0042325)	1/125	0.46662	0.509179	0	0	1.61095	1.22793	FNIP1	GO_Biological_Process_2021	yellow
922	circulatory system development (GO:0072359)	1/126	0.469304	0.511552	0	0	1.59798	1.20888	PTEN	GO_Biological_Process_2021	yellow
923	plasma membrane bounded cell projection organization (GO:0120036)	1/128	0.474631	0.516798	0	0	1.57266	1.17197	PPP1R9A	GO_Biological_Process_2021	yellow
924	cellular response to insulin stimulus (GO:0032869)	1/129	0.477275	0.517495	0	0	1.56029	1.15409	ATP6V0B	GO_Biological_Process_2021	yellow
925	positive regulation of transcription by RNA polymerase II (GO:0045944)	5/908	0.478075	0.517495	0	0	1.10724	0.817132	BCL9;TNKS;AKAP8L;LRP5;CAMK1	GO_Biological_Process_2021	yellow
926	proteasome-mediated ubiquitin-dependent protein catabolic process (GO:0043161)	2/321	0.47874	0.517495	0	0	1.2527	0.922738	ZNRF1;FBXL17	GO_Biological_Process_2021	yellow
927	regulation of primary metabolic process (GO:0080090)	1/130	0.479906	0.517495	0	0	1.54812	1.13657	ROCK2	GO_Biological_Process_2021	yellow
928	regulation of response to external stimulus (GO:0032101)	1/130	0.479906	0.517495	0	0	1.54812	1.13657	FOXP1	GO_Biological_Process_2021	yellow
929	positive regulation of canonical Wnt signaling pathway (GO:0090263)	1/130	0.479906	0.517495	0	0	1.54812	1.13657	TNKS	GO_Biological_Process_2021	yellow
930	G2/M transition of mitotic cell cycle (GO:0000086)	1/130	0.479906	0.517495	0	0	1.54812	1.13657	FBXL17	GO_Biological_Process_2021	yellow
931	Golgi organization (GO:0007030)	1/130	0.479906	0.517495	0	0	1.54812	1.13657	CLASP2	GO_Biological_Process_2021	yellow
932	protein glycosylation (GO:0006486)	1/130	0.479906	0.517495	0	0	1.54812	1.13657	ST3GAL3	GO_Biological_Process_2021	yellow
933	defense response to virus (GO:0051607)	1/133	0.487719	0.525357	0	0	1.5127	1.08614	SERINC3	GO_Biological_Process_2021	yellow
934	negative regulation of inflammatory response to antigenic stimulus (GO:0002862)	1/136	0.495416	0.532506	0	0	1.47886	1.03869	GNG2	GO_Biological_Process_2021	yellow
935	cellular calcium ion homeostasis (GO:0006874)	1/136	0.495416	0.532506	0	0	1.47886	1.03869	SLC24A3	GO_Biological_Process_2021	yellow
936	regulation of inflammatory response to antigenic stimulus (GO:0002861)	1/137	0.497956	0.534665	0	0	1.46791	1.02349	GNG2	GO_Biological_Process_2021	yellow
937	potassium ion transmembrane transport (GO:0071805)	1/139	0.502999	0.539502	0	0	1.44649	0.993983	SLC24A3	GO_Biological_Process_2021	yellow
938	neuron projection morphogenesis (GO:0048812)	1/140	0.505501	0.541608	0	0	1.43601	0.979656	PTEN	GO_Biological_Process_2021	yellow
939	regulation of apoptotic process (GO:0042981)	4/742	0.511086	0.547009	0	0	1.08187	0.726166	TJP1;ARHGEF1;TARDBP;RBM5	GO_Biological_Process_2021	yellow
940	positive regulation of multicellular organismal process (GO:0051240)	2/345	0.516967	0.552127	0	0	1.16362	0.767731	CADM1;CNOT3	GO_Biological_Process_2021	yellow
941	post-translational protein modification (GO:0043687)	2/345	0.516967	0.552127	0	0	1.16362	0.767731	GOLM1;DCAF8	GO_Biological_Process_2021	yellow
942	regulation of mRNA stability (GO:0043488)	1/146	0.520256	0.55505	0	0	1.37618	0.899241	ROCK2	GO_Biological_Process_2021	yellow
943	positive regulation of intracellular protein transport (GO:0090316)	1/148	0.525076	0.559006	0	0	1.35731	0.874398	CAMK1	GO_Biological_Process_2021	yellow
944	positive regulation of transferase activity (GO:0051347)	1/148	0.525076	0.559006	0	0	1.35731	0.874398	TNKS	GO_Biological_Process_2021	yellow
945	positive regulation of hydrolase activity (GO:0051345)	1/149	0.527469	0.560959	0	0	1.34808	0.862318	RAPGEF6	GO_Biological_Process_2021	yellow
946	brain development (GO:0007420)	1/150	0.529849	0.562895	0	0	1.33896	0.850458	PTEN	GO_Biological_Process_2021	yellow
947	ubiquitin-dependent protein catabolic process (GO:0006511)	2/354	0.530824	0.563335	0	0	1.13335	0.717778	ZNRF1;FBXL17	GO_Biological_Process_2021	yellow
948	gene expression (GO:0010467)	2/356	0.533867	0.565967	0	0	1.12683	0.707208	HNRNPH1;RBM5	GO_Biological_Process_2021	yellow
949	positive regulation of Wnt signaling pathway (GO:0030177)	1/153	0.536919	0.568603	0	0	1.31233	0.81615	TNKS	GO_Biological_Process_2021	yellow
950	cellular response to interleukin-1 (GO:0071347)	1/155	0.541574	0.572326	0	0	1.29516	0.794289	SIRPA	GO_Biological_Process_2021	yellow
951	positive regulation of NF-kappaB transcription factor activity (GO:0051092)	1/155	0.541574	0.572326	0	0	1.29516	0.794289	PRKCB	GO_Biological_Process_2021	yellow
952	organonitrogen compound biosynthetic process (GO:1901566)	1/158	0.54847	0.579004	0	0	1.27022	0.762923	GPHN	GO_Biological_Process_2021	yellow
953	protein autophosphorylation (GO:0046777)	1/159	0.550745	0.580796	0	0	1.26211	0.75283	ULK2	GO_Biological_Process_2021	yellow
954	protein transport (GO:0015031)	2/369	0.553321	0.582901	0	0	1.08619	0.642827	ATP6V0B;PRKCB	GO_Biological_Process_2021	yellow
955	double-strand break repair (GO:0006302)	1/164	0.561954	0.590757	0	0	1.22309	0.704909	IFFO1	GO_Biological_Process_2021	yellow
956	heart development (GO:0007507)	1/164	0.561954	0.590757	0	0	1.22309	0.704909	PTEN	GO_Biological_Process_2021	yellow
957	regulation of MAPK cascade (GO:0043408)	1/166	0.56636	0.594767	0	0	1.20814	0.68686	ROCK2	GO_Biological_Process_2021	yellow
958	nuclear-transcribed mRNA catabolic process (GO:0000956)	1/171	0.577183	0.604869	0	0	1.17231	0.644298	CNOT3	GO_Biological_Process_2021	yellow
959	positive regulation of I-kappaB kinase/NF-kappaB signaling (GO:0043123)	1/171	0.577183	0.604869	0	0	1.17231	0.644298	PRKCB	GO_Biological_Process_2021	yellow
960	neuron differentiation (GO:0030182)	1/174	0.583548	0.610902	0	0	1.15181	0.620396	ATP8A2	GO_Biological_Process_2021	yellow
961	negative regulation of immune response (GO:0050777)	1/178	0.591887	0.618987	0	0	1.12555	0.590282	GNG2	GO_Biological_Process_2021	yellow
962	protein stabilization (GO:0050821)	1/179	0.593946	0.61985	0	0	1.11917	0.58305	PTEN	GO_Biological_Process_2021	yellow
963	regulation of immune response (GO:0050776)	1/179	0.593946	0.61985	0	0	1.11917	0.58305	FOXP1	GO_Biological_Process_2021	yellow
964	positive regulation of cellular biosynthetic process (GO:0031328)	1/180	0.595995	0.621343	0	0	1.11286	0.575931	NOS1AP	GO_Biological_Process_2021	yellow
965	negative regulation of cytokine production (GO:0001818)	1/182	0.600061	0.624934	0	0	1.10045	0.562026	SIRPA	GO_Biological_Process_2021	yellow
966	antigen receptor-mediated signaling pathway (GO:0050851)	1/185	0.606085	0.630555	0	0	1.08235	0.541967	PRKCB	GO_Biological_Process_2021	yellow
967	protein modification by small protein conjugation (GO:0032446)	2/409	0.609579	0.633533	0	0	0.977436	0.483818	FBXL17;DTX4	GO_Biological_Process_2021	yellow
968	cellular response to tumor necrosis factor (GO:0071356)	1/194	0.623624	0.646792	0	0	1.0314	0.487037	CDIP1	GO_Biological_Process_2021	yellow
969	regulation of programmed cell death (GO:0043067)	1/194	0.623624	0.646792	0	0	1.0314	0.487037	TARDBP	GO_Biological_Process_2021	yellow
970	regulation of signal transduction (GO:0009966)	1/198	0.631168	0.653942	0	0	1.01025	0.464902	FBXL17	GO_Biological_Process_2021	yellow
971	endomembrane system organization (GO:0010256)	1/199	0.633031	0.655196	0	0	1.0051	0.459569	CLASP2	GO_Biological_Process_2021	yellow
972	generation of neurons (GO:0048699)	1/202	0.638563	0.660242	0	0	0.989949	0.444027	FGF13	GO_Biological_Process_2021	yellow
973	axon guidance (GO:0007411)	1/203	0.640388	0.661449	0	0	0.984998	0.438995	PLXNA4	GO_Biological_Process_2021	yellow
974	regulation of protein kinase B signaling (GO:0051896)	1/207	0.6476	0.668211	0	0	0.965676	0.419569	PTEN	GO_Biological_Process_2021	yellow
975	positive regulation of GTPase activity (GO:0043547)	1/214	0.659877	0.680181	0	0	0.933608	0.388102	RAPGEF6	GO_Biological_Process_2021	yellow
976	negative regulation of transcription by RNA polymerase II (GO:0000122)	3/684	0.669501	0.689394	0	0	0.872837	0.350202	KCNIP3;FNIP1;FOXP1	GO_Biological_Process_2021	yellow
977	regulation of I-kappaB kinase/NF-kappaB signaling (GO:0043122)	1/224	0.676685	0.696079	0	0	0.89129	0.348092	PRKCB	GO_Biological_Process_2021	yellow
978	apoptotic process (GO:0006915)	1/231	0.687959	0.70623	0	0	0.863856	0.323105	CDIP1	GO_Biological_Process_2021	yellow
979	regulation of autophagy (GO:0010506)	1/231	0.687959	0.70623	0	0	0.863856	0.323105	ATP6V0B	GO_Biological_Process_2021	yellow
980	neutrophil degranulation (GO:0043312)	2/481	0.697111	0.714894	0	0	0.827447	0.298552	ATP8A1;SIRPA	GO_Biological_Process_2021	yellow
981	negative regulation of apoptotic process (GO:0043066)	2/485	0.701469	0.717898	0	0	0.820425	0.290905	TJP1;FNIP1	GO_Biological_Process_2021	yellow
982	neutrophil activation involved in immune response (GO:0002283)	2/485	0.701469	0.717898	0	0	0.820425	0.290905	ATP8A1;SIRPA	GO_Biological_Process_2021	yellow
983	neutrophil mediated immunity (GO:0002446)	2/488	0.704704	0.720475	0	0	0.815235	0.285314	ATP8A1;SIRPA	GO_Biological_Process_2021	yellow
984	positive regulation of transcription, DNA-templated (GO:0045893)	5/1183	0.712096	0.727294	0	0	0.836476	0.284019	BCL9;TNKS;AKAP8L;LRP5;CAMK1	GO_Biological_Process_2021	yellow
985	regulation of canonical Wnt signaling pathway (GO:0060828)	1/253	0.720917	0.735555	0	0	0.787558	0.257713	TNKS	GO_Biological_Process_2021	yellow
986	protein deubiquitination (GO:0016579)	1/267	0.740071	0.754332	0	0	0.745576	0.224425	PTEN	GO_Biological_Process_2021	yellow
987	central nervous system development (GO:0007417)	1/268	0.741388	0.754909	0	0	0.742746	0.222252	PTEN	GO_Biological_Process_2021	yellow
988	positive regulation of MAPK cascade (GO:0043410)	1/274	0.749154	0.761274	0	0	0.7262	0.209734	ROCK2	GO_Biological_Process_2021	yellow
989	inorganic cation transmembrane transport (GO:0098662)	1/274	0.749154	0.761274	0	0	0.7262	0.209734	SLC24A3	GO_Biological_Process_2021	yellow
990	protein modification by small protein removal (GO:0070646)	1/276	0.751691	0.76308	0	0	0.720845	0.205751	PTEN	GO_Biological_Process_2021	yellow
991	plasma membrane bounded cell projection assembly (GO:0120031)	1/278	0.754202	0.764857	0	0	0.715567	0.201857	RAPGEF6	GO_Biological_Process_2021	yellow
992	innate immune response (GO:0045087)	1/302	0.782448	0.792702	0	0	0.657707	0.161353	SERINC3	GO_Biological_Process_2021	yellow
993	MAPK cascade (GO:0000165)	1/303	0.783553	0.793022	0	0	0.655495	0.159886	FGF13	GO_Biological_Process_2021	yellow
994	intracellular protein transport (GO:0006886)	1/336	0.817044	0.826086	0	0	0.589929	0.119203	STRADA	GO_Biological_Process_2021	yellow
995	cellular response to DNA damage stimulus (GO:0006974)	1/350	0.829652	0.83799	0	0	0.565859	0.105674	FOXP1	GO_Biological_Process_2021	yellow
996	negative regulation of programmed cell death (GO:0043069)	1/381	0.854589	0.862311	0	0	0.518873	0.0815328	TJP1	GO_Biological_Process_2021	yellow
997	negative regulation of transcription, DNA-templated (GO:0045892)	3/948	0.858792	0.865683	0	0	0.620357	0.0944361	KCNIP3;FNIP1;FOXP1	GO_Biological_Process_2021	yellow
998	cellular protein metabolic process (GO:0044267)	1/417	0.879043	0.885209	0	0	0.473096	0.0609923	GOLM1	GO_Biological_Process_2021	yellow
999	organelle organization (GO:0006996)	1/420	0.880887	0.886177	0	0	0.469637	0.0595623	CLASP2	GO_Biological_Process_2021	yellow
1000	negative regulation of nucleic acid-templated transcription (GO:1903507)	1/464	0.904937	0.909462	0	0	0.424046	0.0423578	FOXP1	GO_Biological_Process_2021	yellow
1001	cellular response to cytokine stimulus (GO:0071345)	1/482	0.913329	0.916978	0	0	0.407799	0.0369709	SIRPA	GO_Biological_Process_2021	yellow
1002	positive regulation of nucleic acid-templated transcription (GO:1903508)	1/511	0.925332	0.928102	0	0	0.384036	0.0298025	LRP5	GO_Biological_Process_2021	yellow
1003	negative regulation of cellular macromolecule biosynthetic process (GO:2000113)	1/547	0.937965	0.939835	0	0	0.358049	0.0229305	FOXP1	GO_Biological_Process_2021	yellow
1004	regulation of transcription, DNA-templated (GO:0006355)	7/2244	0.941394	0.942332	0	0	0.594311	0.0358926	PRKCB;PHF14;LRP5;ZNF697;BACH2;MED12L;FOXP1	GO_Biological_Process_2021	yellow
1005	cytokine-mediated signaling pathway (GO:0019221)	1/621	0.957665	0.957665	0	0	0.314109	0.0135875	CDIP1	GO_Biological_Process_2021	yellow
1006	prespliceosome (GO:0071010)	2/15	0.00249083	0.142571	0	0	31.2198	187.167	SNRNP70;LUC7L2	GO_Cellular_Component_2021	yellow
1007	U2-type prespliceosome (GO:0071004)	2/15	0.00249083	0.142571	0	0	31.2198	187.167	SNRNP70;LUC7L2	GO_Cellular_Component_2021	yellow
1008	U1 snRNP (GO:0005685)	2/18	0.00359424	0.142571	0	0	25.3622	142.749	SNRNP70;LUC7L2	GO_Cellular_Component_2021	yellow
1009	glutamatergic synapse (GO:0098978)	3/69	0.0050044	0.148881	0	0	9.29428	49.2359	NOS1AP;LRRC4;ARHGAP39	GO_Cellular_Component_2021	yellow
1010	basolateral plasma membrane (GO:0016323)	4/151	0.00699124	0.166392	0	0	5.59892	27.788	TJP1;CADM1;SLC7A8;ABCC5	GO_Cellular_Component_2021	yellow
1011	U2-type spliceosomal complex (GO:0005684)	3/89	0.0100964	0.200244	0	0	7.12563	32.7464	SRRM2;SNRNP70;LUC7L2	GO_Cellular_Component_2021	yellow
1012	heterotrimeric G-protein complex (GO:0005834)	2/33	0.0118146	0.200848	0	0	13.0803	58.0559	GNG2;GNG12	GO_Cellular_Component_2021	yellow
1013	anchored component of plasma membrane (GO:0046658)	2/46	0.022208	0.29384	0	0	9.20965	35.0639	RTN4RL1;GPHN	GO_Cellular_Component_2021	yellow
1014	cytoplasmic side of lysosomal membrane (GO:0098574)	1/5	0.0247535	0.29384	0	0	50.2424	185.836	CDIP1	GO_Cellular_Component_2021	yellow
1015	spliceosomal snRNP complex (GO:0097525)	2/51	0.0269215	0.29384	0	0	8.26781	29.8867	SNRNP70;LUC7L2	GO_Cellular_Component_2021	yellow
1016	sarcolemma (GO:0042383)	2/52	0.0279086	0.29384	0	0	8.10204	28.9958	NOS1AP;SNTA1	GO_Cellular_Component_2021	yellow
1017	cortical endoplasmic reticulum (GO:0032541)	1/6	0.029631	0.29384	0	0	40.1919	141.433	ASPH	GO_Cellular_Component_2021	yellow
1018	kinetochore microtubule (GO:0005828)	1/7	0.0344842	0.312888	0	0	33.4916	112.775	CLASP2	GO_Cellular_Component_2021	yellow
1019	MOZ/MORF histone acetyltransferase complex (GO:0070776)	1/8	0.0393135	0.312888	0	0	28.7056	92.8968	PHF14	GO_Cellular_Component_2021	yellow
1020	integral component of mitochondrial membrane (GO:0032592)	2/66	0.0431674	0.312888	0	0	6.32526	19.8782	COX16;SPIRE1	GO_Cellular_Component_2021	yellow
1021	H3 histone acetyltransferase complex (GO:0070775)	1/9	0.0441188	0.312888	0	0	25.1162	78.3842	PHF14	GO_Cellular_Component_2021	yellow
1022	microvillus membrane (GO:0031528)	1/11	0.0536583	0.312888	0	0	20.0909	58.7683	SLC7A8	GO_Cellular_Component_2021	yellow
1023	primary lysosome (GO:0005766)	1/11	0.0536583	0.312888	0	0	20.0909	58.7683	HEXA	GO_Cellular_Component_2021	yellow
1024	integral component of postsynaptic density membrane (GO:0099061)	1/11	0.0536583	0.312888	0	0	20.0909	58.7683	LRRC4	GO_Cellular_Component_2021	yellow
1025	intrinsic component of postsynaptic density membrane (GO:0099146)	1/11	0.0536583	0.312888	0	0	20.0909	58.7683	LRRC4	GO_Cellular_Component_2021	yellow
1026	P-body (GO:0000932)	2/80	0.0608217	0.312888	0	0	5.18629	14.5206	TNRC6C;CNOT3	GO_Cellular_Component_2021	yellow
1027	beta-catenin-TCF complex (GO:1990907)	1/13	0.0631034	0.312888	0	0	16.7407	46.2543	BCL9	GO_Cellular_Component_2021	yellow
1028	podosome (GO:0002102)	1/13	0.0631034	0.312888	0	0	16.7407	46.2543	SH3PXD2A	GO_Cellular_Component_2021	yellow
1029	spanning component of plasma membrane (GO:0044214)	1/13	0.0631034	0.312888	0	0	16.7407	46.2543	SLC24A3	GO_Cellular_Component_2021	yellow
1030	axonal growth cone (GO:0044295)	1/14	0.0677909	0.322685	0	0	15.4522	41.587	MYO9A	GO_Cellular_Component_2021	yellow
1031	integral component of postsynaptic specialization membrane (GO:0099060)	1/15	0.0724552	0.331622	0	0	14.3478	37.6598	LRRC4	GO_Cellular_Component_2021	yellow
1032	lysosomal membrane (GO:0005765)	4/330	0.083743	0.358944	0	0	2.50179	6.20445	ATP6V0B;ATP8A1;CDIP1;FNIP1	GO_Cellular_Component_2021	yellow
1033	microtubule cytoskeleton (GO:0015630)	4/331	0.0844574	0.358944	0	0	2.49401	6.16397	NISCH;CSPP1;FGF13;CLASP2	GO_Cellular_Component_2021	yellow
1034	spanning component of membrane (GO:0089717)	1/20	0.0954324	0.391602	0	0	10.5694	24.831	SLC24A3	GO_Cellular_Component_2021	yellow
1035	integral component of mitochondrial outer membrane (GO:0031307)	1/22	0.104465	0.405148	0	0	9.56181	21.5992	SPIRE1	GO_Cellular_Component_2021	yellow
1036	endoplasmic reticulum tubular network (GO:0071782)	1/23	0.108947	0.405148	0	0	9.12672	20.2329	ASPH	GO_Cellular_Component_2021	yellow
1037	intrinsic component of mitochondrial outer membrane (GO:0031306)	1/23	0.108947	0.405148	0	0	9.12672	20.2329	SPIRE1	GO_Cellular_Component_2021	yellow
1038	gap junction (GO:0005921)	1/24	0.113408	0.408955	0	0	8.72947	19.002	TJP1	GO_Cellular_Component_2021	yellow
1039	synaptic membrane (GO:0097060)	1/26	0.122262	0.424109	0	0	8.0303	16.8764	GPHN	GO_Cellular_Component_2021	yellow
1040	sarcoplasmic reticulum membrane (GO:0033017)	1/28	0.131029	0.424109	0	0	7.43472	15.1098	NOS1AP	GO_Cellular_Component_2021	yellow
1041	U2-type catalytic step 2 spliceosome (GO:0071007)	1/30	0.13971	0.424109	0	0	6.92128	13.6224	SRRM2	GO_Cellular_Component_2021	yellow
1042	adherens junction (GO:0005912)	2/132	0.141342	0.424109	0	0	3.10361	6.07245	MAGI1;TJP1	GO_Cellular_Component_2021	yellow
1043	asymmetric synapse (GO:0032279)	2/133	0.143055	0.424109	0	0	3.07976	5.98869	PPP1R9A;GPHN	GO_Cellular_Component_2021	yellow
1044	intercalated disc (GO:0014704)	1/31	0.144017	0.424109	0	0	6.69024	12.9645	FGF13	GO_Cellular_Component_2021	yellow
1045	voltage-gated calcium channel complex (GO:0005891)	1/31	0.144017	0.424109	0	0	6.69024	12.9645	CACNB2	GO_Cellular_Component_2021	yellow
1046	postsynaptic density (GO:0014069)	2/138	0.151685	0.424109	0	0	2.96579	5.59332	PPP1R9A;GPHN	GO_Cellular_Component_2021	yellow
1047	dendrite (GO:0030425)	3/270	0.153106	0.424109	0	0	2.27418	4.26779	FGF13;PPP1R9A;GPHN	GO_Cellular_Component_2021	yellow
1048	cell-cell junction (GO:0005911)	3/271	0.154292	0.424109	0	0	2.26558	4.23416	MAGI1;TJP1;CADM1	GO_Cellular_Component_2021	yellow
1049	Cul4-RING E3 ubiquitin ligase complex (GO:0080008)	1/34	0.156813	0.424109	0	0	6.08111	11.2665	DCAF8	GO_Cellular_Component_2021	yellow
1050	ion channel complex (GO:0034702)	1/35	0.161037	0.425852	0	0	5.90196	10.7777	LRRC8D	GO_Cellular_Component_2021	yellow
1051	neuromuscular junction (GO:0031594)	1/38	0.173581	0.433858	0	0	5.4226	9.49559	SNTA1	GO_Cellular_Component_2021	yellow
1052	intrinsic component of mitochondrial inner membrane (GO:0031304)	1/39	0.177721	0.433858	0	0	5.27964	9.1208	COX16	GO_Cellular_Component_2021	yellow
1053	azurophil granule (GO:0042582)	2/155	0.181725	0.433858	0	0	2.63399	4.49164	ATP8A1;HEXA	GO_Cellular_Component_2021	yellow
1054	cullin-RING ubiquitin ligase complex (GO:0031461)	2/157	0.185318	0.433858	0	0	2.59974	4.38233	FBXL17;DCAF8	GO_Cellular_Component_2021	yellow
1055	exocytic vesicle membrane (GO:0099501)	1/41	0.185939	0.433858	0	0	5.01515	8.43717	MCTP1	GO_Cellular_Component_2021	yellow
1056	synaptic vesicle membrane (GO:0030672)	1/41	0.185939	0.433858	0	0	5.01515	8.43717	MCTP1	GO_Cellular_Component_2021	yellow
1057	integral component of plasma membrane (GO:0005887)	10/1454	0.190147	0.435144	0	0	1.42013	2.35736	CACNB2;SLC24A3;SLC7A8;GOLM1;ABCC5;KCNIP3;SLC16A7;SIRPA;LRRC8D;PLXNA4	GO_Cellular_Component_2021	yellow
1058	calcium channel complex (GO:0034704)	1/45	0.202133	0.437342	0	0	4.55831	7.28797	CACNB2	GO_Cellular_Component_2021	yellow
1059	phagocytic vesicle membrane (GO:0030670)	1/45	0.202133	0.437342	0	0	4.55831	7.28797	ATP6V0B	GO_Cellular_Component_2021	yellow
1060	sarcoplasmic reticulum (GO:0016529)	1/45	0.202133	0.437342	0	0	4.55831	7.28797	NOS1AP	GO_Cellular_Component_2021	yellow
1061	cell-cell contact zone (GO:0044291)	1/47	0.210109	0.446483	0	0	4.35968	6.80166	FGF13	GO_Cellular_Component_2021	yellow
1062	U2-type precatalytic spliceosome (GO:0071005)	1/50	0.221927	0.448425	0	0	4.09215	6.16035	SRRM2	GO_Cellular_Component_2021	yellow
1063	integral component of mitochondrial inner membrane (GO:0031305)	1/51	0.225827	0.448425	0	0	4.0101	5.96697	COX16	GO_Cellular_Component_2021	yellow
1064	precatalytic spliceosome (GO:0071011)	1/52	0.229708	0.448425	0	0	3.93127	5.7827	SRRM2	GO_Cellular_Component_2021	yellow
1065	microtubule (GO:0005874)	2/182	0.230932	0.448425	0	0	2.23583	3.2769	FGF13;CLASP2	GO_Cellular_Component_2021	yellow
1066	cytoplasmic side of plasma membrane (GO:0009898)	1/55	0.241235	0.448425	0	0	3.71231	5.27884	PTEN	GO_Cellular_Component_2021	yellow
1067	microvillus (GO:0005902)	1/57	0.248825	0.448425	0	0	3.57937	4.97892	SLC7A8	GO_Cellular_Component_2021	yellow
1068	cis-Golgi network (GO:0005801)	1/57	0.248825	0.448425	0	0	3.57937	4.97892	BCL9	GO_Cellular_Component_2021	yellow
1069	spindle (GO:0005819)	2/192	0.249408	0.448425	0	0	2.11708	2.93991	CSPP1;CLASP2	GO_Cellular_Component_2021	yellow
1070	azurophil granule membrane (GO:0035577)	1/58	0.252591	0.448425	0	0	3.51639	4.8385	ATP8A1	GO_Cellular_Component_2021	yellow
1071	SCF ubiquitin ligase complex (GO:0019005)	1/58	0.252591	0.448425	0	0	3.51639	4.8385	FBXL17	GO_Cellular_Component_2021	yellow
1072	filopodium (GO:0030175)	1/58	0.252591	0.448425	0	0	3.51639	4.8385	FGF13	GO_Cellular_Component_2021	yellow
1073	caveola (GO:0005901)	1/60	0.260068	0.448425	0	0	3.39685	4.57491	NOS1AP	GO_Cellular_Component_2021	yellow
1074	ficolin-1-rich granule membrane (GO:0101003)	1/61	0.263779	0.448425	0	0	3.34007	4.45112	SIRPA	GO_Cellular_Component_2021	yellow
1075	spindle microtubule (GO:0005876)	1/61	0.263779	0.448425	0	0	3.34007	4.45112	CLASP2	GO_Cellular_Component_2021	yellow
1076	nuclear membrane (GO:0031965)	2/204	0.271641	0.455285	0	0	1.9901	2.59365	TNKS;NOS1AP	GO_Cellular_Component_2021	yellow
1077	endoplasmic reticulum membrane (GO:0005789)	5/712	0.284143	0.469626	0	0	1.42879	1.79782	MCTP1;ASPH;RNF180;NOS1AP;EXTL3	GO_Cellular_Component_2021	yellow
1078	late endosome membrane (GO:0031902)	1/68	0.289244	0.471507	0	0	2.99005	3.70911	CDIP1	GO_Cellular_Component_2021	yellow
1079	neuron projection (GO:0043005)	4/556	0.302765	0.474295	0	0	1.46045	1.74494	PTEN;FGF13;PPP1R9A;GPHN	GO_Cellular_Component_2021	yellow
1080	tertiary granule membrane (GO:0070821)	1/73	0.306897	0.474295	0	0	2.78171	3.28587	SIRPA	GO_Cellular_Component_2021	yellow
1081	vesicle membrane (GO:0012506)	1/73	0.306897	0.474295	0	0	2.78171	3.28587	SPIRE1	GO_Cellular_Component_2021	yellow
1082	voltage-gated potassium channel complex (GO:0008076)	1/73	0.306897	0.474295	0	0	2.78171	3.28587	KCNIP3	GO_Cellular_Component_2021	yellow
1083	bicellular tight junction (GO:0005923)	1/78	0.324116	0.494485	0	0	2.60042	2.92977	TJP1	GO_Cellular_Component_2021	yellow
1084	potassium channel complex (GO:0034705)	1/80	0.330885	0.494737	0	0	2.53433	2.80293	KCNIP3	GO_Cellular_Component_2021	yellow
1085	trans-Golgi network (GO:0005802)	2/239	0.336152	0.494737	0	0	1.69319	1.8459	ATP8A1;CLASP2	GO_Cellular_Component_2021	yellow
1086	plasma membrane raft (GO:0044853)	1/82	0.337586	0.494737	0	0	2.47151	2.6839	NOS1AP	GO_Cellular_Component_2021	yellow
1087	actin-based cell projection (GO:0098858)	1/83	0.340912	0.494737	0	0	2.44124	2.6271	FGF13	GO_Cellular_Component_2021	yellow
1088	tight junction (GO:0070160)	1/85	0.347513	0.496952	0	0	2.38288	2.51859	TJP1	GO_Cellular_Component_2021	yellow
1089	lysosomal lumen (GO:0043202)	1/86	0.35079	0.496952	0	0	2.35472	2.46673	HEXA	GO_Cellular_Component_2021	yellow
1090	specific granule membrane (GO:0035579)	1/91	0.366929	0.506241	0	0	2.22334	2.2291	ATP8A1	GO_Cellular_Component_2021	yellow
1091	polymeric cytoskeletal fiber (GO:0099513)	2/256	0.366954	0.506241	0	0	1.5785	1.58248	FGF13;CLASP2	GO_Cellular_Component_2021	yellow
1092	cell projection membrane (GO:0031253)	1/92	0.370109	0.506241	0	0	2.1988	2.18552	SLC7A8	GO_Cellular_Component_2021	yellow
1093	lytic vacuole membrane (GO:0098852)	2/267	0.386599	0.519934	0	0	1.51213	1.43708	ATP6V0B;FNIP1	GO_Cellular_Component_2021	yellow
1094	apical junction complex (GO:0043296)	1/98	0.388858	0.519934	0	0	2.06217	1.9478	TJP1	GO_Cellular_Component_2021	yellow
1095	phagocytic vesicle (GO:0045335)	1/100	0.394984	0.521724	0	0	2.0203	1.87668	ATP6V0B	GO_Cellular_Component_2021	yellow
1096	secretory granule membrane (GO:0030667)	2/274	0.398966	0.521724	0	0	1.47269	1.35322	ATP8A1;SIRPA	GO_Cellular_Component_2021	yellow
1097	endoplasmic reticulum lumen (GO:0005788)	2/285	0.418166	0.540888	0	0	1.41465	1.2334	COL27A1;GOLM1	GO_Cellular_Component_2021	yellow
1098	lysosome (GO:0005764)	3/477	0.427819	0.547425	0	0	1.26752	1.07619	ATP6V0B;HEXA;FNIP1	GO_Cellular_Component_2021	yellow
1099	intracellular membrane-bounded organelle (GO:0043231)	27/5192	0.443811	0.561846	0	0	1.05517	0.85717	ATP8A1;TNKS;HEXA;AKAP8L;PTEN;PPM1H;DCAF8;SNRNP70;ZC3H12B;RBM5;SRRM2;PRKCB;STRADA;CCZ1;ABCA9;FBXL17;MEMO1;FOXP1;NISCH;BCL9;HNRNPH1;NOS1AP;CDIP1;PKIG;FGF13;RAPGEF5;TARDBP	GO_Cellular_Component_2021	yellow
1100	mitotic spindle (GO:0072686)	1/120	0.452999	0.564941	0	0	1.67906	1.32959	CLASP2	GO_Cellular_Component_2021	yellow
1101	intrinsic component of endoplasmic reticulum membrane (GO:0031227)	1/121	0.455751	0.564941	0	0	1.66498	1.30836	RNF180	GO_Cellular_Component_2021	yellow
1102	actin cytoskeleton (GO:0015629)	2/316	0.47055	0.577273	0	0	1.27298	0.959635	SH3PXD2A;PPP1R9A	GO_Cellular_Component_2021	yellow
1103	recycling endosome (GO:0055037)	1/145	0.517827	0.62879	0	0	1.3858	0.912015	MCTP1	GO_Cellular_Component_2021	yellow
1104	endocytic vesicle membrane (GO:0030666)	1/158	0.54847	0.65422	0	0	1.27022	0.762923	ATP6V0B	GO_Cellular_Component_2021	yellow
1105	specific granule (GO:0042581)	1/160	0.55301	0.65422	0	0	1.25411	0.742912	ATP8A1	GO_Cellular_Component_2021	yellow
1106	vacuolar lumen (GO:0005775)	1/161	0.555263	0.65422	0	0	1.24621	0.733164	HEXA	GO_Cellular_Component_2021	yellow
1107	tertiary granule (GO:0070820)	1/164	0.561954	0.655613	0	0	1.22309	0.704909	SIRPA	GO_Cellular_Component_2021	yellow
1108	cytoplasmic vesicle membrane (GO:0030659)	2/380	0.569337	0.657778	0	0	1.05399	0.593694	ATP6V0B;SPIRE1	GO_Cellular_Component_2021	yellow
1109	cytoskeleton (GO:0005856)	3/600	0.580777	0.664543	0	0	1	0.543389	NISCH;ROCK2;PPP1R9A	GO_Cellular_Component_2021	yellow
1110	ficolin-1-rich granule (GO:0101002)	1/184	0.604087	0.684632	0	0	1.08831	0.54855	SIRPA	GO_Cellular_Component_2021	yellow
1111	endocytic vesicle (GO:0030139)	1/189	0.613978	0.689277	0	0	1.0591	0.516626	RAPGEF6	GO_Cellular_Component_2021	yellow
1112	axon (GO:0030424)	1/204	0.642205	0.714228	0	0	0.980097	0.434034	FGF13	GO_Cellular_Component_2021	yellow
1113	nucleus (GO:0005634)	21/4484	0.671378	0.73976	0	0	0.91945	0.366329	SRRM2;PRKCB;TNKS;STRADA;AKAP8L;PTEN;PPM1H;FBXL17;DCAF8;MEMO1;FOXP1;SNRNP70;HNRNPH1;ZC3H12B;NOS1AP;CDIP1;PKIG;FGF13;RAPGEF5;TARDBP;RBM5	GO_Cellular_Component_2021	yellow
1114	bounding membrane of organelle (GO:0098588)	3/767	0.743118	0.811294	0	0	0.774653	0.229995	ATP6V0B;NOS1AP;ST3GAL3	GO_Cellular_Component_2021	yellow
1115	intracellular organelle lumen (GO:0070013)	3/848	0.801963	0.864619	0	0	0.697432	0.153918	COL27A1;OXCT1;GOLM1	GO_Cellular_Component_2021	yellow
1116	endosome membrane (GO:0010008)	1/325	0.806493	0.864619	0	0	0.610301	0.131251	ATP6V0B	GO_Cellular_Component_2021	yellow
1117	mitochondrial matrix (GO:0005759)	1/348	0.827905	0.879649	0	0	0.569179	0.107494	OXCT1	GO_Cellular_Component_2021	yellow
1118	intracellular non-membrane-bounded organelle (GO:0043232)	4/1158	0.83788	0.882369	0	0	0.676849	0.119721	MAGI1;SH3PXD2A;ROCK2;CSPP1	GO_Cellular_Component_2021	yellow
1119	collagen-containing extracellular matrix (GO:0062023)	1/380	0.853844	0.886281	0	0	0.520269	0.0822058	COL27A1	GO_Cellular_Component_2021	yellow
1120	focal adhesion (GO:0005925)	1/387	0.858981	0.886281	0	0	0.510651	0.0776235	CLASP2	GO_Cellular_Component_2021	yellow
1121	cell-substrate junction (GO:0030055)	1/394	0.863938	0.886281	0	0	0.501375	0.0733283	CLASP2	GO_Cellular_Component_2021	yellow
1122	Golgi membrane (GO:0000139)	1/472	0.908762	0.924296	0	0	0.416672	0.039864	ST3GAL3	GO_Cellular_Component_2021	yellow
1123	nucleolus (GO:0005730)	1/733	0.976322	0.977756	0	0	0.264503	0.00633822	MAGI1	GO_Cellular_Component_2021	yellow
1124	nuclear lumen (GO:0031981)	1/745	0.977756	0.977756	0	0	0.260074	0.00585048	MAGI1	GO_Cellular_Component_2021	yellow
1125	phosphatidylserine flippase activity (GO:0140346)	2/5	0.000245087	0.0277824	0	0	135.354	1125.32	ATP8A2;ATP8A1	GO_Molecular_Function_2021	yellow
1126	aminophospholipid flippase activity (GO:0015247)	2/7	0.000511333	0.0277824	0	0	81.2041	615.404	ATP8A2;ATP8A1	GO_Molecular_Function_2021	yellow
1127	nitric-oxide synthase binding (GO:0050998)	2/7	0.000511333	0.0277824	0	0	81.2041	615.404	NOS1AP;SNTA1	GO_Molecular_Function_2021	yellow
1128	ABC-type xenobiotic transporter activity (GO:0008559)	2/11	0.00132184	0.0515421	0	0	45.1043	298.984	ABCC3;ABCC5	GO_Molecular_Function_2021	yellow
1129	glycerophospholipid flippase activity (GO:0140333)	2/12	0.00158105	0.0515421	0	0	40.5918	261.804	ATP8A2;ATP8A1	GO_Molecular_Function_2021	yellow
1130	mRNA binding (GO:0003729)	6/263	0.00207631	0.0564063	0	0	4.87863	30.1361	SRRM2;SNRNP70;ZC3H12B;TARDBP;RBM5;LUC7L2	GO_Molecular_Function_2021	yellow
1131	PDZ domain binding (GO:0030165)	3/63	0.00387572	0.0815824	0	0	10.2268	56.7897	CADM1;PTEN;GNG12	GO_Molecular_Function_2021	yellow
1132	phosphatidic acid binding (GO:0070300)	2/19	0.00400405	0.0815824	0	0	23.8691	131.768	RAPGEF6;PITPNC1	GO_Molecular_Function_2021	yellow
1133	guanyl-nucleotide exchange factor activity (GO:0005085)	4/149	0.00667475	0.120887	0	0	5.67672	28.4371	CCZ1;RAPGEF5;FNIP1;RAPGEF6	GO_Molecular_Function_2021	yellow
1134	androgen receptor binding (GO:0050681)	2/27	0.00800811	0.130532	0	0	16.2245	78.3205	PRKCB;FOXP1	GO_Molecular_Function_2021	yellow
1135	kinase activator activity (GO:0019209)	2/31	0.0104725	0.150392	0	0	13.9838	63.7523	STRADA;FGF13	GO_Molecular_Function_2021	yellow
1136	sodium channel regulator activity (GO:0017080)	2/37	0.0147111	0.150392	0	0	11.5831	48.8708	FGF13;SNTA1	GO_Molecular_Function_2021	yellow
1137	L-leucine transmembrane transporter activity (GO:0015190)	1/5	0.0247535	0.150392	0	0	50.2424	185.836	SLC7A8	GO_Molecular_Function_2021	yellow
1138	phosphatidylinositol trisphosphate phosphatase activity (GO:0034594)	1/5	0.0247535	0.150392	0	0	50.2424	185.836	PTEN	GO_Molecular_Function_2021	yellow
1139	ATPase inhibitor activity (GO:0042030)	1/5	0.0247535	0.150392	0	0	50.2424	185.836	FNIP1	GO_Molecular_Function_2021	yellow
1140	calcium, potassium:sodium antiporter activity (GO:0008273)	1/5	0.0247535	0.150392	0	0	50.2424	185.836	SLC24A3	GO_Molecular_Function_2021	yellow
1141	glutathione transmembrane transporter activity (GO:0034634)	1/5	0.0247535	0.150392	0	0	50.2424	185.836	ABCC5	GO_Molecular_Function_2021	yellow
1142	purine nucleotide transmembrane transporter activity (GO:0015216)	1/5	0.0247535	0.150392	0	0	50.2424	185.836	ABCC5	GO_Molecular_Function_2021	yellow
1143	voltage-gated calcium channel activity involved in cardiac muscle cell action potential (GO:0086007)	1/5	0.0247535	0.150392	0	0	50.2424	185.836	CACNB2	GO_Molecular_Function_2021	yellow
1144	pyruvate transmembrane transporter activity (GO:0050833)	1/5	0.0247535	0.150392	0	0	50.2424	185.836	SLC16A7	GO_Molecular_Function_2021	yellow
1145	histone acetyltransferase activity (H3-K23 specific) (GO:0043994)	1/5	0.0247535	0.150392	0	0	50.2424	185.836	PHF14	GO_Molecular_Function_2021	yellow
1146	GTPase activator activity (GO:0005096)	5/336	0.0267994	0.150392	0	0	3.11162	11.2621	CCZ1;ARHGAP39;RAPGEF5;FNIP1;RAPGEF6	GO_Molecular_Function_2021	yellow
1147	protein serine/threonine kinase activity (GO:0004674)	5/344	0.0292525	0.150392	0	0	3.03695	10.7259	CLK1;PRKCB;ROCK2;ULK2;CAMK1	GO_Molecular_Function_2021	yellow
1148	phosphatidylethanolamine flippase activity (GO:0090555)	1/6	0.029631	0.150392	0	0	40.1919	141.433	ATP8A2	GO_Molecular_Function_2021	yellow
1149	amidine-lyase activity (GO:0016842)	1/6	0.029631	0.150392	0	0	40.1919	141.433	GGACT	GO_Molecular_Function_2021	yellow
1150	thyroid hormone transmembrane transporter activity (GO:0015349)	1/6	0.029631	0.150392	0	0	40.1919	141.433	SLC7A8	GO_Molecular_Function_2021	yellow
1151	tripeptide transmembrane transporter activity (GO:0042937)	1/6	0.029631	0.150392	0	0	40.1919	141.433	ABCC5	GO_Molecular_Function_2021	yellow
1152	calcium ion transmembrane transporter activity (GO:0015085)	2/55	0.0309557	0.150392	0	0	7.64228	26.5584	CACNB2;SLC24A3	GO_Molecular_Function_2021	yellow
1153	carboxylic acid transmembrane transporter activity (GO:0046943)	2/57	0.0330569	0.150392	0	0	7.36364	25.1065	SLC7A8;SLC16A7	GO_Molecular_Function_2021	yellow
1154	histone threonine kinase activity (GO:0035184)	1/7	0.0344842	0.150392	0	0	33.4916	112.775	PRKCB	GO_Molecular_Function_2021	yellow
1155	ABC-type glutathione S-conjugate transporter activity (GO:0015431)	1/7	0.0344842	0.150392	0	0	33.4916	112.775	ABCC3	GO_Molecular_Function_2021	yellow
1156	DEAD/H-box RNA helicase binding (GO:0017151)	1/7	0.0344842	0.150392	0	0	33.4916	112.775	AKAP8L	GO_Molecular_Function_2021	yellow
1157	phosphatidic acid transfer activity (GO:1990050)	1/7	0.0344842	0.150392	0	0	33.4916	112.775	PITPNC1	GO_Molecular_Function_2021	yellow
1158	phosphatidylinositol phosphate 4-phosphatase activity (GO:0034596)	1/7	0.0344842	0.150392	0	0	33.4916	112.775	INPP4B	GO_Molecular_Function_2021	yellow
1159	branched-chain amino acid transmembrane transporter activity (GO:0015658)	1/7	0.0344842	0.150392	0	0	33.4916	112.775	SLC7A8	GO_Molecular_Function_2021	yellow
1160	organic anion transmembrane transporter activity (GO:0008514)	3/144	0.0356326	0.150392	0	0	4.33406	14.4519	SLC7A8;ABCC5;SLC16A7	GO_Molecular_Function_2021	yellow
1161	protein serine/threonine phosphatase activity (GO:0004722)	2/62	0.0385452	0.150392	0	0	6.7483	21.9719	PTEN;PPM1H	GO_Molecular_Function_2021	yellow
1162	coreceptor activity involved in Wnt signaling pathway (GO:0071936)	1/8	0.0393135	0.150392	0	0	28.7056	92.8968	LRP5	GO_Molecular_Function_2021	yellow
1163	superoxide-generating NADPH oxidase activator activity (GO:0016176)	1/8	0.0393135	0.150392	0	0	28.7056	92.8968	SH3PXD2A	GO_Molecular_Function_2021	yellow
1164	U1 snRNA binding (GO:0030619)	1/8	0.0393135	0.150392	0	0	28.7056	92.8968	SNRNP70	GO_Molecular_Function_2021	yellow
1165	cAMP-dependent protein kinase inhibitor activity (GO:0004862)	1/8	0.0393135	0.150392	0	0	28.7056	92.8968	PKIG	GO_Molecular_Function_2021	yellow
1166	glycine transmembrane transporter activity (GO:0015187)	1/8	0.0393135	0.150392	0	0	28.7056	92.8968	SLC7A8	GO_Molecular_Function_2021	yellow
1167	protein kinase activator activity (GO:0030295)	2/63	0.0396819	0.150392	0	0	6.63734	21.4178	STRADA;FGF13	GO_Molecular_Function_2021	yellow
1168	L-alanine transmembrane transporter activity (GO:0015180)	1/9	0.0441188	0.150392	0	0	25.1162	78.3842	SLC7A8	GO_Molecular_Function_2021	yellow
1169	phosphatidylinositol transfer activity (GO:0008526)	1/9	0.0441188	0.150392	0	0	25.1162	78.3842	PITPNC1	GO_Molecular_Function_2021	yellow
1170	volume-sensitive anion channel activity (GO:0005225)	1/9	0.0441188	0.150392	0	0	25.1162	78.3842	LRRC8D	GO_Molecular_Function_2021	yellow
1171	H3 histone acetyltransferase activity (GO:0010484)	1/9	0.0441188	0.150392	0	0	25.1162	78.3842	PHF14	GO_Molecular_Function_2021	yellow
1172	RNA binding (GO:0003723)	12/1406	0.0477388	0.150392	0	0	1.81029	5.50692	SRRM2;DALRD3;SNRNP70;HNRNPH1;ROCK2;ZC3H12B;AKAP8L;FBRSL1;ARHGEF1;TARDBP;RBM5;LUC7L2	GO_Molecular_Function_2021	yellow
1173	nucleotide transmembrane transporter activity (GO:0015215)	1/10	0.0489004	0.150392	0	0	22.3244	67.3742	ABCC5	GO_Molecular_Function_2021	yellow
1174	protein binding involved in heterotypic cell-cell adhesion (GO:0086080)	1/10	0.0489004	0.150392	0	0	22.3244	67.3742	SIRPA	GO_Molecular_Function_2021	yellow
1175	calcium:sodium antiporter activity (GO:0005432)	1/10	0.0489004	0.150392	0	0	22.3244	67.3742	SLC24A3	GO_Molecular_Function_2021	yellow
1176	cAMP-dependent protein kinase regulator activity (GO:0008603)	1/10	0.0489004	0.150392	0	0	22.3244	67.3742	PKIG	GO_Molecular_Function_2021	yellow
1177	high voltage-gated calcium channel activity (GO:0008331)	1/10	0.0489004	0.150392	0	0	22.3244	67.3742	CACNB2	GO_Molecular_Function_2021	yellow
1178	semaphorin receptor activity (GO:0017154)	1/11	0.0536583	0.161968	0	0	20.0909	58.7683	PLXNA4	GO_Molecular_Function_2021	yellow
1179	alanine transmembrane transporter activity (GO:0022858)	1/12	0.0583926	0.166982	0	0	18.2635	51.8788	SLC7A8	GO_Molecular_Function_2021	yellow
1180	C2H2 zinc finger domain binding (GO:0070742)	1/12	0.0583926	0.166982	0	0	18.2635	51.8788	SRRM2	GO_Molecular_Function_2021	yellow
1181	hexosaminidase activity (GO:0015929)	1/12	0.0583926	0.166982	0	0	18.2635	51.8788	HEXA	GO_Molecular_Function_2021	yellow
1182	microtubule minus-end binding (GO:0051011)	1/13	0.0631034	0.177342	0	0	16.7407	46.2543	TUBGCP5	GO_Molecular_Function_2021	yellow
1183	calcium channel activity (GO:0005262)	2/84	0.0662504	0.181146	0	0	4.9323	13.3878	CACNB2;SLC24A3	GO_Molecular_Function_2021	yellow
1184	phosphatidylglycerol binding (GO:1901611)	1/14	0.0677909	0.181146	0	0	15.4522	41.587	PITPNC1	GO_Molecular_Function_2021	yellow
1185	protein kinase C activity (GO:0004697)	1/14	0.0677909	0.181146	0	0	15.4522	41.587	PRKCB	GO_Molecular_Function_2021	yellow
1186	phosphatidylinositol-3-phosphatase activity (GO:0004438)	1/15	0.0724552	0.187464	0	0	14.3478	37.6598	PTEN	GO_Molecular_Function_2021	yellow
1187	Wnt-activated receptor activity (GO:0042813)	1/15	0.0724552	0.187464	0	0	14.3478	37.6598	LRP5	GO_Molecular_Function_2021	yellow
1188	organic cation transmembrane transporter activity (GO:0015101)	1/16	0.0770964	0.187563	0	0	13.3906	34.316	SLC7A8	GO_Molecular_Function_2021	yellow
1189	ATPase activity, coupled to transmembrane movement of ions, rotational mechanism (GO:0044769)	1/16	0.0770964	0.187563	0	0	13.3906	34.316	ATP6V0B	GO_Molecular_Function_2021	yellow
1190	potassium ion antiporter activity (GO:0022821)	1/16	0.0770964	0.187563	0	0	13.3906	34.316	SLC24A3	GO_Molecular_Function_2021	yellow
1191	proton-transporting ATPase activity, rotational mechanism (GO:0046961)	1/16	0.0770964	0.187563	0	0	13.3906	34.316	ATP6V0B	GO_Molecular_Function_2021	yellow
1192	phosphatidylinositol monophosphate phosphatase activity (GO:0052744)	1/17	0.0817146	0.193036	0	0	12.553	31.4393	PTEN	GO_Molecular_Function_2021	yellow
1193	anion transmembrane transporter activity (GO:0008509)	1/17	0.0817146	0.193036	0	0	12.553	31.4393	ABCC5	GO_Molecular_Function_2021	yellow
1194	phosphatidylcholine transporter activity (GO:0008525)	1/18	0.08631	0.195646	0	0	11.814	28.9421	PITPNC1	GO_Molecular_Function_2021	yellow
1195	protein kinase regulator activity (GO:0019887)	2/98	0.0864202	0.195646	0	0	4.21003	10.3084	STRADA;FGF13	GO_Molecular_Function_2021	yellow
1196	cation channel activity (GO:0005261)	2/98	0.0864202	0.195646	0	0	4.21003	10.3084	CACNB2;SLC24A3	GO_Molecular_Function_2021	yellow
1197	tau-protein kinase activity (GO:0050321)	1/20	0.0954324	0.210209	0	0	10.5694	24.831	ROCK2	GO_Molecular_Function_2021	yellow
1198	microtubule plus-end binding (GO:0051010)	1/20	0.0954324	0.210209	0	0	10.5694	24.831	CLASP2	GO_Molecular_Function_2021	yellow
1199	actinin binding (GO:0042805)	1/21	0.0999598	0.210219	0	0	10.0404	23.1229	MAGI1	GO_Molecular_Function_2021	yellow
1200	sialyltransferase activity (GO:0008373)	1/21	0.0999598	0.210219	0	0	10.0404	23.1229	ST3GAL3	GO_Molecular_Function_2021	yellow
1201	ubiquitin-specific protease binding (GO:1990381)	1/21	0.0999598	0.210219	0	0	10.0404	23.1229	PTEN	GO_Molecular_Function_2021	yellow
1202	adenylyltransferase activity (GO:0070566)	1/22	0.104465	0.210219	0	0	9.56181	21.5992	GPHN	GO_Molecular_Function_2021	yellow
1203	phospholipid transfer activity (GO:0120014)	1/22	0.104465	0.210219	0	0	9.56181	21.5992	PITPNC1	GO_Molecular_Function_2021	yellow
1204	poly(U) RNA binding (GO:0008266)	1/22	0.104465	0.210219	0	0	9.56181	21.5992	HNRNPH1	GO_Molecular_Function_2021	yellow
1205	protein kinase A regulatory subunit binding (GO:0034237)	1/22	0.104465	0.210219	0	0	9.56181	21.5992	AKAP8L	GO_Molecular_Function_2021	yellow
1206	gamma-tubulin binding (GO:0043015)	1/23	0.108947	0.212476	0	0	9.12672	20.2329	TUBGCP5	GO_Molecular_Function_2021	yellow
1207	pyrophosphate hydrolysis-driven proton transmembrane transporter activity (GO:0009678)	1/23	0.108947	0.212476	0	0	9.12672	20.2329	ATP6V0B	GO_Molecular_Function_2021	yellow
1208	microtubule binding (GO:0008017)	3/232	0.110466	0.212476	0	0	2.65669	5.85281	TUBGCP5;FGF13;CLASP2	GO_Molecular_Function_2021	yellow
1209	alpha-actinin binding (GO:0051393)	1/24	0.113408	0.212476	0	0	8.72947	19.002	MAGI1	GO_Molecular_Function_2021	yellow
1210	calmodulin-dependent protein kinase activity (GO:0004683)	1/24	0.113408	0.212476	0	0	8.72947	19.002	CAMK1	GO_Molecular_Function_2021	yellow
1211	cell adhesion mediator activity (GO:0098631)	1/24	0.113408	0.212476	0	0	8.72947	19.002	SIRPA	GO_Molecular_Function_2021	yellow
1212	phospholipase C activity (GO:0004629)	1/25	0.117846	0.21583	0	0	8.36532	17.8882	PLCL1	GO_Molecular_Function_2021	yellow
1213	poly-pyrimidine tract binding (GO:0008187)	1/25	0.117846	0.21583	0	0	8.36532	17.8882	HNRNPH1	GO_Molecular_Function_2021	yellow
1214	nuclear receptor binding (GO:0016922)	2/120	0.121166	0.218997	0	0	3.42131	7.221	PRKCB;FOXP1	GO_Molecular_Function_2021	yellow
1215	NAD+ ADP-ribosyltransferase activity (GO:0003950)	1/26	0.122262	0.218997	0	0	8.0303	16.8764	TNKS	GO_Molecular_Function_2021	yellow
1216	monocarboxylic acid transmembrane transporter activity (GO:0008028)	1/28	0.131029	0.23215	0	0	7.43472	15.1098	SLC16A7	GO_Molecular_Function_2021	yellow
1217	ubiquitin conjugating enzyme binding (GO:0031624)	1/29	0.13538	0.237279	0	0	7.16883	14.3353	RNF180	GO_Molecular_Function_2021	yellow
1218	protein serine/threonine kinase inhibitor activity (GO:0030291)	1/30	0.13971	0.242262	0	0	6.92128	13.6224	PKIG	GO_Molecular_Function_2021	yellow
1219	ubiquitin protein ligase activity (GO:0061630)	3/263	0.144887	0.246669	0	0	2.33624	4.51315	ZNRF1;RNF180;DTX4	GO_Molecular_Function_2021	yellow
1220	SH2 domain binding (GO:0042169)	1/32	0.148304	0.246669	0	0	6.4741	12.3558	ARHGAP5	GO_Molecular_Function_2021	yellow
1221	beta-tubulin binding (GO:0048487)	1/32	0.148304	0.246669	0	0	6.4741	12.3558	FGF13	GO_Molecular_Function_2021	yellow
1222	neutral amino acid transmembrane transporter activity (GO:0015175)	1/32	0.148304	0.246669	0	0	6.4741	12.3558	SLC7A8	GO_Molecular_Function_2021	yellow
1223	2-oxoglutarate-dependent dioxygenase activity (GO:0016706)	1/33	0.152569	0.249562	0	0	6.27146	11.7912	PHYHD1	GO_Molecular_Function_2021	yellow
1224	ubiquitin-like protein ligase activity (GO:0061659)	3/270	0.153106	0.249562	0	0	2.27418	4.26779	ZNRF1;RNF180;DTX4	GO_Molecular_Function_2021	yellow
1225	endoribonuclease activity (GO:0004521)	1/34	0.156813	0.253075	0	0	6.08111	11.2665	ZC3H12B	GO_Molecular_Function_2021	yellow
1226	ubiquitin-like protein conjugating enzyme binding (GO:0044390)	1/35	0.161037	0.254844	0	0	5.90196	10.7777	RNF180	GO_Molecular_Function_2021	yellow
1227	non-membrane spanning protein tyrosine kinase activity (GO:0004715)	1/35	0.161037	0.254844	0	0	5.90196	10.7777	CLK1	GO_Molecular_Function_2021	yellow
1228	phosphoric diester hydrolase activity (GO:0008081)	1/36	0.165239	0.258089	0	0	5.73304	10.3216	PLCL1	GO_Molecular_Function_2021	yellow
1229	core promoter sequence-specific DNA binding (GO:0001046)	1/37	0.16942	0.258089	0	0	5.57351	9.89507	FOXP1	GO_Molecular_Function_2021	yellow
1230	protein serine/threonine kinase activator activity (GO:0043539)	1/37	0.16942	0.258089	0	0	5.57351	9.89507	STRADA	GO_Molecular_Function_2021	yellow
1231	voltage-gated calcium channel activity (GO:0005245)	1/37	0.16942	0.258089	0	0	5.57351	9.89507	CACNB2	GO_Molecular_Function_2021	yellow
1232	pentosyltransferase activity (GO:0016763)	1/38	0.173581	0.259575	0	0	5.4226	9.49559	TNKS	GO_Molecular_Function_2021	yellow
1233	ATPase regulator activity (GO:0060590)	1/38	0.173581	0.259575	0	0	5.4226	9.49559	FNIP1	GO_Molecular_Function_2021	yellow
1234	tau protein binding (GO:0048156)	1/40	0.18184	0.269454	0	0	5.144	8.76861	ROCK2	GO_Molecular_Function_2021	yellow
1235	active ion transmembrane transporter activity (GO:0022853)	1/42	0.190018	0.276544	0	0	4.89258	8.12481	SLC16A7	GO_Molecular_Function_2021	yellow
1236	cell-cell adhesion mediator activity (GO:0098632)	1/42	0.190018	0.276544	0	0	4.89258	8.12481	SIRPA	GO_Molecular_Function_2021	yellow
1237	snRNA binding (GO:0017069)	1/43	0.194076	0.279951	0	0	4.77585	7.83004	SNRNP70	GO_Molecular_Function_2021	yellow
1238	tubulin binding (GO:0015631)	3/307	0.198757	0.284188	0	0	1.99362	3.22104	TUBGCP5;FGF13;CLASP2	GO_Molecular_Function_2021	yellow
1239	protein kinase C binding (GO:0005080)	1/45	0.202133	0.286501	0	0	4.55831	7.28797	PRKCB	GO_Molecular_Function_2021	yellow
1240	acetylglucosaminyltransferase activity (GO:0008375)	1/48	0.214068	0.298232	0	0	4.26671	6.57696	HEXA	GO_Molecular_Function_2021	yellow
1241	cation transmembrane transporter activity (GO:0008324)	1/48	0.214068	0.298232	0	0	4.26671	6.57696	SLC7A8	GO_Molecular_Function_2021	yellow
1242	amino acid transmembrane transporter activity (GO:0015171)	1/49	0.218007	0.298615	0	0	4.17761	6.36345	SLC7A8	GO_Molecular_Function_2021	yellow
1243	tRNA binding (GO:0000049)	1/49	0.218007	0.298615	0	0	4.17761	6.36345	DALRD3	GO_Molecular_Function_2021	yellow
1244	potassium channel regulator activity (GO:0015459)	1/50	0.221927	0.298959	0	0	4.09215	6.16035	KCNIP3	GO_Molecular_Function_2021	yellow
1245	calcium-dependent phospholipid binding (GO:0005544)	1/50	0.221927	0.298959	0	0	4.09215	6.16035	MCTP1	GO_Molecular_Function_2021	yellow
1246	endonuclease activity (GO:0004519)	1/51	0.225827	0.30172	0	0	4.0101	5.96697	ZC3H12B	GO_Molecular_Function_2021	yellow
1247	nuclear receptor coactivator activity (GO:0030374)	1/53	0.233569	0.307031	0	0	3.85548	5.60693	PRKCB	GO_Molecular_Function_2021	yellow
1248	L-amino acid transmembrane transporter activity (GO:0015179)	1/53	0.233569	0.307031	0	0	3.85548	5.60693	SLC7A8	GO_Molecular_Function_2021	yellow
1249	secondary active transmembrane transporter activity (GO:0015291)	1/56	0.245039	0.319531	0	0	3.64463	5.12558	SLC7A8	GO_Molecular_Function_2021	yellow
1250	ribonuclease activity (GO:0004540)	1/66	0.282059	0.364885	0	0	3.08236	3.90116	ZC3H12B	GO_Molecular_Function_2021	yellow
1251	anion channel activity (GO:0005253)	1/68	0.289244	0.371234	0	0	2.99005	3.70911	LRRC8D	GO_Molecular_Function_2021	yellow
1252	protein tyrosine kinase binding (GO:1990782)	1/72	0.303401	0.384802	0	0	2.82103	3.36463	SIRPA	GO_Molecular_Function_2021	yellow
1253	phospholipase activity (GO:0004620)	1/73	0.306897	0.384802	0	0	2.78171	3.28587	PLCL1	GO_Molecular_Function_2021	yellow
1254	ATPase binding (GO:0051117)	1/73	0.306897	0.384802	0	0	2.78171	3.28587	SNTA1	GO_Molecular_Function_2021	yellow
1255	protein tyrosine phosphatase activity (GO:0004725)	1/74	0.310375	0.385692	0	0	2.74346	3.20978	PTEN	GO_Molecular_Function_2021	yellow
1256	ubiquitin-protein transferase activity (GO:0004842)	3/392	0.312339	0.385692	0	0	1.55124	1.80513	ZNRF1;RNF180;DTX4	GO_Molecular_Function_2021	yellow
1257	GTPase regulator activity (GO:0030695)	2/233	0.325176	0.398523	0	0	1.7377	1.95211	SIRPA;ARHGAP39	GO_Molecular_Function_2021	yellow
1258	UDP-glycosyltransferase activity (GO:0008194)	1/84	0.344221	0.418716	0	0	2.41171	2.57202	HEXA	GO_Molecular_Function_2021	yellow
1259	mRNA 3'-UTR binding (GO:0003730)	1/85	0.347513	0.41959	0	0	2.38288	2.51859	TARDBP	GO_Molecular_Function_2021	yellow
1260	DNA-binding transcription repressor activity, RNA polymerase II-specific (GO:0001227)	2/256	0.366954	0.439805	0	0	1.5785	1.58248	KCNIP3;FOXP1	GO_Molecular_Function_2021	yellow
1261	phosphatidylinositol binding (GO:0035091)	1/92	0.370109	0.440348	0	0	2.1988	2.18552	PITPNC1	GO_Molecular_Function_2021	yellow
1262	histone deacetylase binding (GO:0042826)	1/93	0.373273	0.440895	0	0	2.17479	2.14314	AKAP8L	GO_Molecular_Function_2021	yellow
1263	voltage-gated cation channel activity (GO:0022843)	1/97	0.385772	0.45238	0	0	2.08375	1.98479	CACNB2	GO_Molecular_Function_2021	yellow
1264	protein tyrosine kinase activity (GO:0004713)	1/108	0.418887	0.487704	0	0	1.8685	1.62588	CLK1	GO_Molecular_Function_2021	yellow
1265	phosphatase binding (GO:0019902)	1/114	0.436199	0.504258	0	0	1.76875	1.46746	SIRPA	GO_Molecular_Function_2021	yellow
1266	protease binding (GO:0002020)	1/118	0.447455	0.513204	0	0	1.70793	1.37349	PTEN	GO_Molecular_Function_2021	yellow
1267	hexosyltransferase activity (GO:0016758)	1/119	0.450234	0.513204	0	0	1.69337	1.35129	HEXA	GO_Molecular_Function_2021	yellow
1268	protein phosphatase binding (GO:0019903)	1/123	0.461213	0.522067	0	0	1.63752	1.26727	SIRPA	GO_Molecular_Function_2021	yellow
1269	protein kinase binding (GO:0019901)	3/506	0.465914	0.523752	0	0	1.19266	0.910897	NISCH;PRKCB;SIRPA	GO_Molecular_Function_2021	yellow
1270	cadherin binding (GO:0045296)	2/322	0.480369	0.536302	0	0	1.24872	0.915566	TJP1;ARGLU1	GO_Molecular_Function_2021	yellow
1271	calcium ion binding (GO:0005509)	2/348	0.521615	0.57839	0	0	1.15336	0.750633	MCTP1;ASPH	GO_Molecular_Function_2021	yellow
1272	small GTPase binding (GO:0031267)	1/175	0.585649	0.645005	0	0	1.14513	0.612685	RAPGEF6	GO_Molecular_Function_2021	yellow
1273	protein heterodimerization activity (GO:0046982)	1/188	0.61202	0.669525	0	0	1.06482	0.522817	HEXA	GO_Molecular_Function_2021	yellow
1274	double-stranded DNA binding (GO:0003690)	3/651	0.636337	0.687329	0	0	0.918862	0.415351	TARDBP;BACH2;FOXP1	GO_Molecular_Function_2021	yellow
1275	GTPase binding (GO:0051020)	1/201	0.636728	0.687329	0	0	0.994949	0.449133	RAPGEF6	GO_Molecular_Function_2021	yellow
1276	kinase binding (GO:0019900)	2/461	0.674538	0.723353	0	0	0.86439	0.340335	NISCH;STRADA	GO_Molecular_Function_2021	yellow
1277	metal ion binding (GO:0046872)	2/517	0.734508	0.782515	0	0	0.768179	0.237026	MCTP1;ASPH	GO_Molecular_Function_2021	yellow
1278	zinc ion binding (GO:0008270)	1/336	0.817044	0.864793	0	0	0.589929	0.119203	TNKS	GO_Molecular_Function_2021	yellow
1279	RNA polymerase II cis-regulatory region sequence-specific DNA binding (GO:0000978)	4/1149	0.833366	0.870761	0	0	0.682496	0.124407	KCNIP3;ZNF697;BACH2;FOXP1	GO_Molecular_Function_2021	yellow
1280	cis-regulatory region sequence-specific DNA binding (GO:0000987)	4/1149	0.833366	0.870761	0	0	0.682496	0.124407	KCNIP3;ZNF697;BACH2;FOXP1	GO_Molecular_Function_2021	yellow
1281	sequence-specific DNA binding (GO:0043565)	2/707	0.873061	0.903312	0	0	0.555652	0.0754298	BACH2;FOXP1	GO_Molecular_Function_2021	yellow
1282	sequence-specific double-stranded DNA binding (GO:1990837)	2/712	0.875604	0.903312	0	0	0.551595	0.073275	BACH2;FOXP1	GO_Molecular_Function_2021	yellow
1283	transition metal ion binding (GO:0046914)	1/445	0.895207	0.917727	0	0	0.442624	0.0489989	TNKS	GO_Molecular_Function_2021	yellow
1284	RNA polymerase II transcription regulatory region sequence-specific DNA binding (GO:0000977)	4/1359	0.915058	0.928657	0	0	0.570264	0.0506211	KCNIP3;ZNF697;BACH2;FOXP1	GO_Molecular_Function_2021	yellow
1285	DNA binding (GO:0003677)	2/811	0.917262	0.928657	0	0	0.481597	0.0415918	TARDBP;RBM5	GO_Molecular_Function_2021	yellow
1286	transcription cis-regulatory region binding (GO:0000976)	1/549	0.938601	0.944395	0	0	0.356706	0.0226026	FOXP1	GO_Molecular_Function_2021	yellow
1287	protein homodimerization activity (GO:0042803)	1/636	0.960827	0.960827	0	0	0.30645	0.012246	CADM1	GO_Molecular_Function_2021	yellow
1288	chemical synaptic transmission (GO:0007268)	20/306	4.72104e-17	3.40387e-14	0	0	17.1451	644.517	GRIA1;GABRB3;GABRB1;NLGN1;PTPRN2;KCND2;NRXN1;GRIK2;GABRG3;GRIN2B;RIMS1;GRIN2A;GRM5;DLG2;GRM7;DLGAP1;ASIC2;ERC2;DLGAP2;GRIA4	GO_Biological_Process_2021	blue
1289	regulation of cation channel activity (GO:2001257)	12/89	2.13656e-14	7.7023e-12	0	0	35.1057	1105.02	GRIA1;NLGN1;GRIN2A;DLG2;FGF14;LRRC7;PDE4D;DMD;ANK3;GRIN2B;FGF12;GRIA4	GO_Biological_Process_2021	blue
[truncated: 7,543 more rows]

## Sheet: Oligo_conserved_modules
	gene_name	module	color	kME_grey	kME_blue	kME_brown	kME_yellow	kME_turquoise	kME_green
[truncated: 6,667 more rows]

[truncated: 5 more sheets: Oligo_modules_hubs, enrichr_oligo_consensus_modules, Astrocytes_consevred_modules, Astrocytes_modules_hubs, enrichr_astrocytes_consensus_mo]
