# Supplementary material for: Conserved Cell-Type-Specific Transcriptomic Networks and Regulatory Programs Underlie Alcohol Dependence Across Mouse and Human
Source: Research Square preprint supplement (doi:10.21203/rs.3.rs-9417955/v1), 2026-04-21
Supplement: Supplementary file 2 [file 1601a33659287b2c0065618f.xlsx]

## Sheet: Gpc5_mouse_human_DE_overlap
Gpc5 mouse human and DE genes overlap
ABCD2
ABLIM1
ADGRB3
AHCYL1
AKT2
ARHGAP26
ASRGL1
CAMK2G
CCDC50
CDH4
CHRDL1
CTNND2
DHTKD1
DPF3
DST
FOXN2
GLI3
GNG12
GRID1
GRIN2C
GRM3
HRH1
METTL24
MPPED2
NCKAP5
NHSL1
NRXN1
PHKA1
PREX2
PRKD1
PTK2
PTPRZ1
RBMS3
ROR1
RORB
SH3PXD2B
SLC1A3
SLC30A10
SLCO1C1
SPECC1
SPRED1
SRGAP1
TJP1
TNRC6A
TOX
TTC12
UGP2
VCL
ZFPM2
ZIC1

## Sheet: metascape_Gpc5_genes
GroupID	Category	Term	Description	LogP	Log(q-value)	Genes	Symbols	InTerm_InList
1_Summary	GO Biological Processes	GO:0048667	cell morphogenesis involved in neuron differentiation	-7.33028	-3.0964	1002,1501,2737,5747,5803,6507,7414,9378,80243,577,9760	CDH4,CTNND2,GLI3,PTK2,PTPRZ1,SLC1A3,VCL,NRXN1,PREX2,ADGRB3,TOX	11/-
1_Member	GO Biological Processes	GO:0048667	cell morphogenesis involved in neuron differentiation	-7.33028	-3.0964	1002,1501,2737,5747,5803,6507,7414,9378,80243	CDH4,CTNND2,GLI3,PTK2,PTPRZ1,SLC1A3,VCL,NRXN1,PREX2	9/449
1_Member	GO Biological Processes	GO:0048812	neuron projection morphogenesis	-5.82958	-2.34361	1002,1501,2737,5747,5803,7414,9378,80243	CDH4,CTNND2,GLI3,PTK2,PTPRZ1,VCL,NRXN1,PREX2	8/498
1_Member	GO Biological Processes	GO:0120039	plasma membrane bounded cell projection morphogenesis	-5.79732	-2.34361	1002,1501,2737,5747,5803,7414,9378,80243	CDH4,CTNND2,GLI3,PTK2,PTPRZ1,VCL,NRXN1,PREX2	8/503
1_Member	GO Biological Processes	GO:0048858	cell projection morphogenesis	-5.75275	-2.34361	1002,1501,2737,5747,5803,7414,9378,80243	CDH4,CTNND2,GLI3,PTK2,PTPRZ1,VCL,NRXN1,PREX2	8/510
1_Member	GO Biological Processes	GO:0000902	cell morphogenesis	-5.68588	-2.34361	1002,1501,2737,5747,5803,6507,7414,9378,80243	CDH4,CTNND2,GLI3,PTK2,PTPRZ1,SLC1A3,VCL,NRXN1,PREX2	9/706
1_Member	GO Biological Processes	GO:0031175	neuron projection development	-4.67401	-1.58797	1002,1501,2737,5747,5803,7414,9378,80243	CDH4,CTNND2,GLI3,PTK2,PTPRZ1,VCL,NRXN1,PREX2	8/717
1_Member	GO Biological Processes	GO:0007409	axonogenesis	-4.4915	-1.4551	1002,2737,5747,5803,7414,9378	CDH4,GLI3,PTK2,PTPRZ1,VCL,NRXN1	6/370
1_Member	GO Biological Processes	GO:0061564	axon development	-4.14664	-1.20232	1002,2737,5747,5803,7414,9378	CDH4,GLI3,PTK2,PTPRZ1,VCL,NRXN1	6/427
1_Member	GO Biological Processes	GO:0051962	positive regulation of nervous system development	-3.97146	-1.12055	577,1002,2737,5803,9378	ADGRB3,CDH4,GLI3,PTPRZ1,NRXN1	5/285
1_Member	GO Biological Processes	GO:2000177	regulation of neural precursor cell proliferation	-3.30545	-0.722658	2737,5803,9760	GLI3,PTPRZ1,TOX	3/93
1_Member	GO Biological Processes	GO:0007411	axon guidance	-3.2602	-0.722658	1002,2737,5747,9378	CDH4,GLI3,PTK2,NRXN1	4/228
1_Member	GO Biological Processes	GO:0097485	neuron projection guidance	-3.25307	-0.722658	1002,2737,5747,9378	CDH4,GLI3,PTK2,NRXN1	4/229
1_Member	GO Biological Processes	GO:0051960	regulation of nervous system development	-3.04532	-0.616869	577,1002,2737,5803,9378	ADGRB3,CDH4,GLI3,PTPRZ1,NRXN1	5/454
1_Member	GO Biological Processes	GO:0010720	positive regulation of cell development	-2.1997	-0.064262	1002,2737,5803,9760	CDH4,GLI3,PTPRZ1,TOX	4/447
1_Member	GO Biological Processes	GO:0050769	positive regulation of neurogenesis	-2.16541	-0.040633	1002,2737,5803	CDH4,GLI3,PTPRZ1	3/234
2_Summary	GO Biological Processes	GO:0007610	behavior	-7.13764	-3.0964	577,2737,2894,3269,5803,6507,7545,9378,80243,92521	ADGRB3,GLI3,GRID1,HRH1,PTPRZ1,SLC1A3,ZIC1,NRXN1,PREX2,SPECC1	10/-
2_Member	GO Biological Processes	GO:0007610	behavior	-7.13764	-3.0964	577,2737,2894,3269,5803,6507,7545,9378,80243,92521	ADGRB3,GLI3,GRID1,HRH1,PTPRZ1,SLC1A3,ZIC1,NRXN1,PREX2,SPECC1	10/634
2_Member	GO Biological Processes	GO:0007611	learning or memory	-3.99299	-1.12055	577,3269,5803,9378,92521	ADGRB3,HRH1,PTPRZ1,NRXN1,SPECC1	5/282
2_Member	GO Biological Processes	GO:0007612	learning	-3.84463	-1.09343	577,3269,9378,92521	ADGRB3,HRH1,NRXN1,SPECC1	4/160
2_Member	GO Biological Processes	GO:0050890	cognition	-3.68126	-0.962244	577,3269,5803,9378,92521	ADGRB3,HRH1,PTPRZ1,NRXN1,SPECC1	5/329
3_Summary	WikiPathways	WP4875	Disruption of postsynaptic signaling by CNV	-6.58564	-2.72049	818,2905,7082,9378,2894,2913,3269,6507,91851,55970,5255,208,285590,5587,5747,667,7414	CAMK2G,GRIN2C,TJP1,NRXN1,GRID1,GRM3,HRH1,SLC1A3,CHRDL1,GNG12,PHKA1,AKT2,SH3PXD2B,PRKD1,PTK2,DST,VCL	17/-
3_Member	WikiPathways	WP4875	Disruption of postsynaptic signaling by CNV	-6.58564	-2.72049	818,2905,7082,9378	CAMK2G,GRIN2C,TJP1,NRXN1	4/33
3_Member	GO Biological Processes	GO:0007215	glutamate receptor signaling pathway	-5.87993	-2.34361	2894,2905,2913,9378	GRID1,GRIN2C,GRM3,NRXN1	4/49
3_Member	GO Biological Processes	GO:0050804	modulation of chemical synaptic transmission	-5.70262	-2.34361	818,2894,2905,2913,3269,6507,9378,91851	CAMK2G,GRID1,GRIN2C,GRM3,HRH1,SLC1A3,NRXN1,CHRDL1	8/518
3_Member	GO Biological Processes	GO:0099177	regulation of trans-synaptic signaling	-5.69641	-2.34361	818,2894,2905,2913,3269,6507,9378,91851	CAMK2G,GRID1,GRIN2C,GRM3,HRH1,SLC1A3,NRXN1,CHRDL1	8/519
3_Member	GO Biological Processes	GO:0007268	chemical synaptic transmission	-5.29202	-2.12585	2894,2905,2913,3269,6507,9378,91851	GRID1,GRIN2C,GRM3,HRH1,SLC1A3,NRXN1,CHRDL1	7/414
3_Member	GO Biological Processes	GO:0098916	anterograde trans-synaptic signaling	-5.29202	-2.12585	2894,2905,2913,3269,6507,9378,91851	GRID1,GRIN2C,GRM3,HRH1,SLC1A3,NRXN1,CHRDL1	7/414
3_Member	GO Biological Processes	GO:0099537	trans-synaptic signaling	-5.15841	-2.02026	2894,2905,2913,3269,6507,9378,91851	GRID1,GRIN2C,GRM3,HRH1,SLC1A3,NRXN1,CHRDL1	7/434
3_Member	GO Biological Processes	GO:0099536	synaptic signaling	-4.94001	-1.8282	2894,2905,2913,3269,6507,9378,91851	GRID1,GRIN2C,GRM3,HRH1,SLC1A3,NRXN1,CHRDL1	7/469
3_Member	GO Biological Processes	GO:0048167	regulation of synaptic plasticity	-4.47515	-1.4551	818,2894,2905,3269,91851	CAMK2G,GRID1,GRIN2C,HRH1,CHRDL1	5/223
3_Member	KEGG Pathway	hsa04724	Glutamatergic synapse	-4.38641	-1.38656	2905,2913,6507,55970	GRIN2C,GRM3,SLC1A3,GNG12	4/116
3_Member	GO Biological Processes	GO:0050885	neuromuscular process controlling balance	-3.98058	-1.12055	2905,6507,9378	GRIN2C,SLC1A3,NRXN1	3/55
3_Member	GO Biological Processes	GO:0051966	regulation of synaptic transmission, glutamatergic	-3.54634	-0.885314	2905,2913,9378	GRIN2C,GRM3,NRXN1	3/77
3_Member	GO Biological Processes	GO:1902414	protein localization to cell junction	-3.30545	-0.722658	2905,7082,9378	GRIN2C,TJP1,NRXN1	3/93
3_Member	KEGG Pathway	hsa04713	Circadian entrainment	-3.25201	-0.722658	818,2905,55970	CAMK2G,GRIN2C,GNG12	3/97
3_Member	KEGG Pathway	hsa04020	Calcium signaling pathway	-3.08507	-0.640432	818,2905,3269,5255	CAMK2G,GRIN2C,HRH1,PHKA1	4/254
3_Member	GO Biological Processes	GO:0072657	protein localization to membrane	-2.97017	-0.57729	208,2905,9378,91851,285590	AKT2,GRIN2C,NRXN1,CHRDL1,SH3PXD2B	5/472
3_Member	WikiPathways	WP5083	Neuroinflammation and glutamatergic signaling	-2.79137	-0.470297	818,2905,6507	CAMK2G,GRIN2C,SLC1A3	3/140
3_Member	GO Biological Processes	GO:0050806	positive regulation of synaptic transmission	-2.65745	-0.38337	2905,6507,9378	GRIN2C,SLC1A3,NRXN1	3/156
3_Member	GO Biological Processes	GO:0051668	localization within membrane	-2.64123	-0.374805	208,2905,9378,91851,285590	AKT2,GRIN2C,NRXN1,CHRDL1,SH3PXD2B	5/561
3_Member	GO Biological Processes	GO:0050905	neuromuscular process	-2.63398	-0.374498	2905,6507,9378	GRIN2C,SLC1A3,NRXN1	3/159
3_Member	GO Biological Processes	GO:0044057	regulation of system process	-2.56598	-0.320626	818,2905,3269,5587,9378	CAMK2G,GRIN2C,HRH1,PRKD1,NRXN1	5/584
3_Member	Reactome Gene Sets	R-HSA-112316	Neuronal System	-2.48912	-0.264131	2905,6507,9378,55970	GRIN2C,SLC1A3,NRXN1,GNG12	4/370
3_Member	KEGG Pathway	hsa04080	Neuroactive ligand-receptor interaction	-2.48912	-0.264131	2894,2905,2913,3269	GRID1,GRIN2C,GRM3,HRH1	4/370
3_Member	WikiPathways	WP5420	ADHD and autism ASD pathways	-2.48494	-0.263249	208,2905,2913,9378	AKT2,GRIN2C,GRM3,NRXN1	4/371
3_Member	GO Biological Processes	GO:0009612	response to mechanical stimulus	-2.22293	-0.0765623	5747,6507,9378	PTK2,SLC1A3,NRXN1	3/223
3_Member	GO Biological Processes	GO:0009611	response to wounding	-2.19633	-0.0635778	667,2905,6507,7414	DST,GRIN2C,SLC1A3,VCL	4/448
3_Member	Reactome Gene Sets	R-HSA-112315	Transmission across Chemical Synapses	-2.14025	-0.0206991	2905,6507,55970	GRIN2C,SLC1A3,GNG12	3/239
4_Summary	WikiPathways	WP4560	MFAP5 effect on permeability and motility of endothelial cells via cytoskeleton rearrangement	-5.46908	-2.16821	5747,7082,7414,577,667,1002,1501,9378,91851,23092	PTK2,TJP1,VCL,ADGRB3,DST,CDH4,CTNND2,NRXN1,CHRDL1,ARHGAP26	10/-
4_Member	WikiPathways	WP4560	MFAP5 effect on permeability and motility of endothelial cells via cytoskeleton rearrangement	-5.46908	-2.16821	5747,7082,7414	PTK2,TJP1,VCL	3/18
4_Member	GO Biological Processes	GO:0034330	cell junction organization	-5.41861	-2.15553	577,667,1002,1501,7082,7414,9378,91851	ADGRB3,DST,CDH4,CTNND2,TJP1,VCL,NRXN1,CHRDL1	8/566
4_Member	GO Biological Processes	GO:1901888	regulation of cell junction assembly	-4.08166	-1.17076	577,5747,7082,7414,9378	ADGRB3,PTK2,TJP1,VCL,NRXN1	5/270
4_Member	GO Biological Processes	GO:0034332	adherens junction organization	-4.00443	-1.12055	1002,7082,7414	CDH4,TJP1,VCL	3/54
4_Member	Canonical Pathways	M281	PID FAK PATHWAY	-3.88947	-1.09343	5747,7414,23092	PTK2,VCL,ARHGAP26	3/59
4_Member	GO Biological Processes	GO:0034329	cell junction assembly	-3.84722	-1.09343	667,1002,7082,7414,9378	DST,CDH4,TJP1,VCL,NRXN1	5/303
4_Member	GO Biological Processes	GO:0007043	cell-cell junction assembly	-2.88363	-0.53259	1002,7082,7414	CDH4,TJP1,VCL	3/130
4_Member	GO Biological Processes	GO:0098609	cell-cell adhesion	-2.67508	-0.388007	1002,1501,7082,7414,9378	CDH4,CTNND2,TJP1,VCL,NRXN1	5/551
4_Member	GO Biological Processes	GO:0045216	cell-cell junction organization	-2.45512	-0.239963	1002,7082,7414	CDH4,TJP1,VCL	3/184
5_Summary	WikiPathways	WP4685	Melanoma	-5.30521	-2.12585	208,2913,7414,80243,27327,10768,7545	AKT2,GRM3,VCL,PREX2,TNRC6A,AHCYL1,ZIC1	7/-
5_Member	WikiPathways	WP4685	Melanoma	-5.30521	-2.12585	208,2913,7414,80243	AKT2,GRM3,VCL,PREX2	4/68
5_Member	Reactome Gene Sets	R-HSA-6807070	PTEN Regulation	-3.23901	-0.722131	208,27327,80243	AKT2,TNRC6A,PREX2	3/98
5_Member	Reactome Gene Sets	R-HSA-9006925	Intracellular signaling by second messengers	-3.2041	-0.700683	208,10768,27327,80243	AKT2,AHCYL1,TNRC6A,PREX2	4/236
5_Member	Reactome Gene Sets	R-HSA-9730414	MITF-M-regulated melanocyte development	-2.91278	-0.552786	208,7545,27327	AKT2,ZIC1,TNRC6A	3/127
5_Member	Reactome Gene Sets	R-HSA-1257604	PIP3 activates AKT signaling	-2.35393	-0.173029	208,27327,80243	AKT2,TNRC6A,PREX2	3/200
6_Summary	GO Biological Processes	GO:1904385	cellular response to angiotensin	-4.65148	-1.58797	5587,10768,55532,208,3269,5747,6507,91851,818,2905	PRKD1,AHCYL1,SLC30A10,AKT2,HRH1,PTK2,SLC1A3,CHRDL1,CAMK2G,GRIN2C	10/-
6_Member	GO Biological Processes	GO:1904385	cellular response to angiotensin	-4.65148	-1.58797	5587,10768,55532	PRKD1,AHCYL1,SLC30A10	3/33
6_Member	GO Biological Processes	GO:1990776	response to angiotensin	-4.30205	-1.34	5587,10768,55532	PRKD1,AHCYL1,SLC30A10	3/43
6_Member	GO Biological Processes	GO:1901699	cellular response to nitrogen compound	-4.11227	-1.18498	208,3269,5587,5747,6507,10768,55532	AKT2,HRH1,PRKD1,PTK2,SLC1A3,AHCYL1,SLC30A10	7/633
6_Member	GO Biological Processes	GO:0071375	cellular response to peptide hormone stimulus	-3.87412	-1.09343	208,5587,5747,10768,55532	AKT2,PRKD1,PTK2,AHCYL1,SLC30A10	5/299
6_Member	GO Biological Processes	GO:0043434	response to peptide hormone	-3.1464	-0.66147	208,5587,5747,10768,55532	AKT2,PRKD1,PTK2,AHCYL1,SLC30A10	5/431
6_Member	GO Biological Processes	GO:0032870	cellular response to hormone stimulus	-2.63789	-0.374805	208,5587,5747,10768,55532	AKT2,PRKD1,PTK2,AHCYL1,SLC30A10	5/562
6_Member	GO Biological Processes	GO:0007167	enzyme-linked receptor protein signaling pathway	-2.42831	-0.219587	208,5587,5747,55532,91851	AKT2,PRKD1,PTK2,SLC30A10,CHRDL1	5/629
6_Member	GO Biological Processes	GO:0007169	cell surface receptor protein tyrosine kinase signaling pathway	-2.25842	-0.103674	208,5587,5747,55532	AKT2,PRKD1,PTK2,SLC30A10	4/430
6_Member	KEGG Pathway	hsa05208	Chemical carcinogenesis - reactive oxygen species	-2.20166	-0.064262	208,5587,5747	AKT2,PRKD1,PTK2	3/227
6_Member	GO Biological Processes	GO:0043269	regulation of monoatomic ion transport	-2.11789	-0.000934081	818,2905,5587,10768	CAMK2G,GRIN2C,PRKD1,AHCYL1	4/472
6_Member	GO Biological Processes	GO:0034762	regulation of transmembrane transport	-2.099	0	208,2905,5587,10768	AKT2,GRIN2C,PRKD1,AHCYL1	4/478
7_Summary	GO Biological Processes	GO:0042307	positive regulation of protein import into nucleus	-4.36464	-1.3841	2737,5587,7545,208,9378,2905,7360,9760,80243,4919	GLI3,PRKD1,ZIC1,AKT2,NRXN1,GRIN2C,UGP2,TOX,PREX2,ROR1	10/-
7_Member	GO Biological Processes	GO:0042307	positive regulation of protein import into nucleus	-4.36464	-1.3841	2737,5587,7545	GLI3,PRKD1,ZIC1	3/41
7_Member	GO Biological Processes	GO:0042306	regulation of protein import into nucleus	-3.8463	-1.09343	2737,5587,7545	GLI3,PRKD1,ZIC1	3/61
7_Member	GO Biological Processes	GO:0046824	positive regulation of nucleocytoplasmic transport	-3.78424	-1.05476	2737,5587,7545	GLI3,PRKD1,ZIC1	3/64
7_Member	GO Biological Processes	GO:1900182	positive regulation of protein localization to nucleus	-3.29187	-0.722658	2737,5587,7545	GLI3,PRKD1,ZIC1	3/94
7_Member	GO Biological Processes	GO:0090316	positive regulation of intracellular protein transport	-3.27843	-0.722658	2737,5587,7545	GLI3,PRKD1,ZIC1	3/95
7_Member	GO Biological Processes	GO:0046822	regulation of nucleocytoplasmic transport	-2.99423	-0.594905	2737,5587,7545	GLI3,PRKD1,ZIC1	3/119
7_Member	GO Biological Processes	GO:1903829	positive regulation of protein localization	-2.86333	-0.523927	208,2737,5587,7545,9378	AKT2,GLI3,PRKD1,ZIC1,NRXN1	5/499
7_Member	GO Biological Processes	GO:0007420	brain development	-2.86187	-0.523927	2737,2905,7360,7545,9378,9760	GLI3,GRIN2C,UGP2,ZIC1,NRXN1,TOX	6/745
7_Member	GO Biological Processes	GO:0032388	positive regulation of intracellular transport	-2.79137	-0.470297	2737,5587,7545	GLI3,PRKD1,ZIC1	3/140
7_Member	GO Biological Processes	GO:1900180	regulation of protein localization to nucleus	-2.73932	-0.424959	2737,5587,7545	GLI3,PRKD1,ZIC1	3/146
7_Member	GO Biological Processes	GO:0060322	head development	-2.7191	-0.410264	2737,2905,7360,7545,9378,9760	GLI3,GRIN2C,UGP2,ZIC1,NRXN1,TOX	6/795
7_Member	GO Biological Processes	GO:0030534	adult behavior	-2.68951	-0.39646	7545,9378,80243	ZIC1,NRXN1,PREX2	3/152
7_Member	GO Biological Processes	GO:0033157	regulation of intracellular protein transport	-2.68951	-0.39646	2737,5587,7545	GLI3,PRKD1,ZIC1	3/152
7_Member	GO Biological Processes	GO:1904951	positive regulation of establishment of protein localization	-2.66305	-0.38337	208,2737,5587,7545	AKT2,GLI3,PRKD1,ZIC1	4/331
7_Member	GO Biological Processes	GO:0021953	central nervous system neuron differentiation	-2.36609	-0.176109	2737,9378,9760	GLI3,NRXN1,TOX	3/198
7_Member	GO Biological Processes	GO:0048839	inner ear development	-2.3419	-0.16695	2737,4919,7545	GLI3,ROR1,ZIC1	3/202
7_Member	GO Biological Processes	GO:0043583	ear development	-2.19118	-0.0611025	2737,4919,7545	GLI3,ROR1,ZIC1	3/229
7_Member	GO Biological Processes	GO:0051222	positive regulation of protein transport	-2.05424	0	2737,5587,7545	GLI3,PRKD1,ZIC1	3/257
8_Summary	Reactome Gene Sets	R-HSA-9009391	Extra-nuclear estrogen signaling	-3.91163	-1.09343	208,5747,55970,27327,10768,818,2737,2905,7082,7414,5803,161742,2913,3269,9378,1002,4919	AKT2,PTK2,GNG12,TNRC6A,AHCYL1,CAMK2G,GLI3,GRIN2C,TJP1,VCL,PTPRZ1,SPRED1,GRM3,HRH1,NRXN1,CDH4,ROR1	17/-
8_Member	Reactome Gene Sets	R-HSA-9009391	Extra-nuclear estrogen signaling	-3.91163	-1.09343	208,5747,55970	AKT2,PTK2,GNG12	3/58
8_Member	Reactome Gene Sets	R-HSA-8939211	ESR-mediated signaling	-3.57675	-0.887696	208,5747,27327,55970	AKT2,PTK2,TNRC6A,GNG12	4/188
8_Member	Reactome Gene Sets	R-HSA-4420097	VEGFA-VEGFR2 Pathway	-3.54634	-0.885314	208,5747,10768	AKT2,PTK2,AHCYL1	3/77
8_Member	Reactome Gene Sets	R-HSA-194138	Signaling by VEGF	-3.40504	-0.778779	208,5747,10768	AKT2,PTK2,AHCYL1	3/86
8_Member	KEGG Pathway	hsa04012	ErbB signaling pathway	-3.40504	-0.778779	208,818,5747	AKT2,CAMK2G,PTK2	3/86
8_Member	WikiPathways	WP673	ErbB signaling	-3.34714	-0.737265	208,818,5747	AKT2,CAMK2G,PTK2	3/90
8_Member	KEGG Pathway	hsa04024	cAMP signaling pathway	-3.27456	-0.722658	208,818,2737,2905	AKT2,CAMK2G,GLI3,GRIN2C	4/226
8_Member	Reactome Gene Sets	R-HSA-109581	Apoptosis	-3.25201	-0.722658	208,5747,7082	AKT2,PTK2,TJP1	3/97
8_Member	KEGG Pathway	hsa04810	Regulation of actin cytoskeleton	-3.23189	-0.722131	208,5747,7414,55970	AKT2,PTK2,VCL,GNG12	4/232
8_Member	WikiPathways	WP185	Integrin mediated cell adhesion	-3.18837	-0.691204	208,5747,7414	AKT2,PTK2,VCL	3/102
8_Member	Reactome Gene Sets	R-HSA-9006934	Signaling by Receptor Tyrosine Kinases	-3.13737	-0.658433	208,5747,5803,10768,161742	AKT2,PTK2,PTPRZ1,AHCYL1,SPRED1	5/433
8_Member	Reactome Gene Sets	R-HSA-9006931	Signaling by Nuclear Receptors	-3.09144	-0.641268	208,5747,27327,55970	AKT2,PTK2,TNRC6A,GNG12	4/253
8_Member	Reactome Gene Sets	R-HSA-5357801	Programmed Cell Death	-3.02627	-0.613428	208,5747,7082	AKT2,PTK2,TJP1	3/116
8_Member	KEGG Pathway	hsa04725	Cholinergic synapse	-3.02627	-0.613428	208,818,55970	AKT2,CAMK2G,GNG12	3/116
8_Member	Reactome Gene Sets	R-HSA-9658195	Leishmania infection	-2.91278	-0.552786	5747,10768,55970	PTK2,AHCYL1,GNG12	3/127
8_Member	Reactome Gene Sets	R-HSA-9824443	Parasitic Infection Pathways	-2.91278	-0.552786	5747,10768,55970	PTK2,AHCYL1,GNG12	3/127
8_Member	KEGG Pathway	hsa04728	Dopaminergic synapse	-2.86459	-0.523927	208,818,55970	AKT2,CAMK2G,GNG12	3/132
8_Member	WikiPathways	WP5434	Cancer pathways	-2.82543	-0.495999	208,818,2737,5747,55970	AKT2,CAMK2G,GLI3,PTK2,GNG12	5/509
8_Member	KEGG Pathway	hsa05200	Pathways in cancer	-2.73784	-0.424959	208,818,2737,5747,55970	AKT2,CAMK2G,GLI3,PTK2,GNG12	5/533
8_Member	WikiPathways	WP51	Regulation of actin cytoskeleton	-2.70588	-0.401038	5747,7414,55970	PTK2,VCL,GNG12	3/150
8_Member	Reactome Gene Sets	R-HSA-388396	GPCR downstream signalling	-2.60153	-0.345627	208,2913,3269,10768,55970	AKT2,GRM3,HRH1,AHCYL1,GNG12	5/573
8_Member	WikiPathways	WP3929	Chemokine signaling	-2.58842	-0.336431	208,5747,55970	AKT2,PTK2,GNG12	3/165
8_Member	KEGG Pathway	hsa04062	Chemokine signaling pathway	-2.39708	-0.194693	208,5747,55970	AKT2,PTK2,GNG12	3/193
8_Member	Reactome Gene Sets	R-HSA-372790	Signaling by GPCR	-2.37364	-0.17917	208,2913,3269,10768,55970	AKT2,GRM3,HRH1,AHCYL1,GNG12	5/648
8_Member	GO Biological Processes	GO:1905475	regulation of protein localization to membrane	-2.37222	-0.17917	208,818,9378	AKT2,CAMK2G,NRXN1	3/197
8_Member	WikiPathways	WP306	Focal adhesion	-2.35999	-0.173478	208,5747,7414	AKT2,PTK2,VCL	3/199
8_Member	KEGG Pathway	hsa04510	Focal adhesion	-2.33593	-0.163929	208,5747,7414	AKT2,PTK2,VCL	3/203
8_Member	KEGG Pathway	hsa05205	Proteoglycans in cancer	-2.33	-0.163825	208,818,5747	AKT2,CAMK2G,PTK2	3/204
8_Member	KEGG Pathway	hsa05170	Human immunodeficiency virus 1 infection	-2.27798	-0.117559	208,5747,55970	AKT2,PTK2,GNG12	3/213
8_Member	KEGG Pathway	hsa05417	Lipid and atherosclerosis	-2.26117	-0.103674	208,818,5747	AKT2,CAMK2G,PTK2	3/216
8_Member	WikiPathways	WP5087	Pleural mesothelioma	-2.22701	-0.0778655	208,1002,4919,5747	AKT2,CDH4,ROR1,PTK2	4/439
8_Member	KEGG Pathway	hsa05163	Human cytomegalovirus infection	-2.20694	-0.0656063	208,5747,55970	AKT2,PTK2,GNG12	3/226
8_Member	KEGG Pathway	hsa05131	Shigellosis	-2.08687	0	208,5747,7414	AKT2,PTK2,VCL	3/250
9_Summary	GO Biological Processes	GO:0045667	regulation of osteoblast differentiation	-3.88693	-1.09343	2737,5587,5747,6096,9378,23414,161742,667,7082,285590,577,5803,7414	GLI3,PRKD1,PTK2,RORB,NRXN1,ZFPM2,SPRED1,DST,TJP1,SH3PXD2B,ADGRB3,PTPRZ1,VCL	13/-
9_Member	GO Biological Processes	GO:0045667	regulation of osteoblast differentiation	-3.88693	-1.09343	2737,5587,5747,6096	GLI3,PRKD1,PTK2,RORB	4/156
9_Member	GO Biological Processes	GO:0001568	blood vessel development	-3.61882	-0.913498	2737,5587,5747,9378,23414,161742	GLI3,PRKD1,PTK2,NRXN1,ZFPM2,SPRED1	6/534
9_Member	GO Biological Processes	GO:0001944	vasculature development	-3.52505	-0.872978	2737,5587,5747,9378,23414,161742	GLI3,PRKD1,PTK2,NRXN1,ZFPM2,SPRED1	6/556
9_Member	GO Biological Processes	GO:0007229	integrin-mediated signaling pathway	-3.29187	-0.722658	667,5587,5747	DST,PRKD1,PTK2	3/94
9_Member	GO Biological Processes	GO:0048514	blood vessel morphogenesis	-3.10172	-0.645951	5587,5747,9378,23414,161742	PRKD1,PTK2,NRXN1,ZFPM2,SPRED1	5/441
9_Member	WikiPathways	WP4659	Gastrin signaling	-3.03715	-0.613964	5587,5747,7082	PRKD1,PTK2,TJP1	3/115
9_Member	GO Biological Processes	GO:0035239	tube morphogenesis	-3.0197	-0.611932	2737,5587,5747,9378,23414,161742	GLI3,PRKD1,PTK2,NRXN1,ZFPM2,SPRED1	6/694
9_Member	GO Biological Processes	GO:0007507	heart development	-2.58527	-0.336431	2737,5747,23414,161742,285590	GLI3,PTK2,ZFPM2,SPRED1,SH3PXD2B	5/578
9_Member	GO Biological Processes	GO:0045765	regulation of angiogenesis	-2.51878	-0.283726	577,5587,7082,161742	ADGRB3,PRKD1,TJP1,SPRED1	4/363
9_Member	GO Biological Processes	GO:1901342	regulation of vasculature development	-2.48077	-0.262355	577,5587,7082,161742	ADGRB3,PRKD1,TJP1,SPRED1	4/372
9_Member	GO Biological Processes	GO:0051897	positive regulation of phosphatidylinositol 3-kinase/protein kinase B signal transduction	-2.41609	-0.210551	5587,5747,9378	PRKD1,PTK2,NRXN1	3/190
9_Member	WikiPathways	WP3888	VEGFA VEGFR2 signaling	-2.25137	-0.0994392	5587,5747,5803,7414	PRKD1,PTK2,PTPRZ1,VCL	4/432
9_Member	GO Biological Processes	GO:0010594	regulation of endothelial cell migration	-2.15528	-0.0331201	5587,5747,161742	PRKD1,PTK2,SPRED1	3/236
10_Summary	GO Biological Processes	GO:0005977	glycogen metabolic process	-3.8463	-1.09343	208,5255,7360,225,5587,5747,27327,818,55526	AKT2,PHKA1,UGP2,ABCD2,PRKD1,PTK2,TNRC6A,CAMK2G,DHTKD1	9/-
10_Member	GO Biological Processes	GO:0005977	glycogen metabolic process	-3.8463	-1.09343	208,5255,7360	AKT2,PHKA1,UGP2	3/61
10_Member	GO Biological Processes	GO:0044042	glucan metabolic process	-3.80458	-1.06438	208,5255,7360	AKT2,PHKA1,UGP2	3/63
10_Member	GO Biological Processes	GO:0006112	energy reserve metabolic process	-3.56309	-0.885314	208,5255,7360	AKT2,PHKA1,UGP2	3/76
10_Member	GO Biological Processes	GO:0005976	polysaccharide metabolic process	-3.46583	-0.822538	208,5255,7360	AKT2,PHKA1,UGP2	3/82
10_Member	GO Biological Processes	GO:0009896	positive regulation of catabolic process	-3.23452	-0.722131	208,225,5255,5587,5747,27327	AKT2,ABCD2,PHKA1,PRKD1,PTK2,TNRC6A	6/631
10_Member	KEGG Pathway	hsa04922	Glucagon signaling pathway	-3.12793	-0.654896	208,818,5255	AKT2,CAMK2G,PHKA1	3/107
10_Member	GO Biological Processes	GO:0062013	positive regulation of small molecule metabolic process	-2.64957	-0.379189	208,225,5255	AKT2,ABCD2,PHKA1	3/157
10_Member	GO Biological Processes	GO:0006091	generation of precursor metabolites and energy	-2.43973	-0.227799	208,5255,7360,55526	AKT2,PHKA1,UGP2,DHTKD1	4/382
10_Member	GO Biological Processes	GO:0005975	carbohydrate metabolic process	-2.20647	-0.0656063	208,5255,7360,55526	AKT2,PHKA1,UGP2,DHTKD1	4/445
11_Summary	KEGG Pathway	hsa04360	Axon guidance	-3.61231	-0.913498	818,3983,5747,57522	CAMK2G,ABLIM1,PTK2,SRGAP1	4/-
11_Member	KEGG Pathway	hsa04360	Axon guidance	-3.61231	-0.913498	818,3983,5747,57522	CAMK2G,ABLIM1,PTK2,SRGAP1	4/184
12_Summary	GO Biological Processes	GO:0010001	glial cell differentiation	-3.34846	-0.737265	208,2737,4919,5803,27327,55970	AKT2,GLI3,ROR1,PTPRZ1,TNRC6A,GNG12	6/-
12_Member	GO Biological Processes	GO:0010001	glial cell differentiation	-3.34846	-0.737265	208,2737,4919,5803	AKT2,GLI3,ROR1,PTPRZ1	4/216
12_Member	Reactome Gene Sets	R-HSA-3858494	Beta-catenin independent WNT signaling	-3.1162	-0.648994	4919,27327,55970	ROR1,TNRC6A,GNG12	3/108
12_Member	Reactome Gene Sets	R-HSA-195721	Signaling by WNT	-2.99269	-0.594905	208,4919,27327,55970	AKT2,ROR1,TNRC6A,GNG12	4/269
12_Member	GO Biological Processes	GO:0042063	gliogenesis	-2.9573	-0.569277	208,2737,4919,5803	AKT2,GLI3,ROR1,PTPRZ1	4/275
13_Summary	GO Biological Processes	GO:0007423	sensory organ development	-3.31546	-0.722658	2737,4919,6096,7545,91851,285590	GLI3,ROR1,RORB,ZIC1,CHRDL1,SH3PXD2B	6/-
13_Member	GO Biological Processes	GO:0007423	sensory organ development	-3.31546	-0.722658	2737,4919,6096,7545,91851,285590	GLI3,ROR1,RORB,ZIC1,CHRDL1,SH3PXD2B	6/609
13_Member	GO Biological Processes	GO:0001654	eye development	-2.35738	-0.173478	2737,6096,91851,285590	GLI3,RORB,CHRDL1,SH3PXD2B	4/403
13_Member	GO Biological Processes	GO:0150063	visual system development	-2.34225	-0.16695	2737,6096,91851,285590	GLI3,RORB,CHRDL1,SH3PXD2B	4/407
13_Member	GO Biological Processes	GO:0048880	sensory system development	-2.31617	-0.152884	2737,6096,91851,285590	GLI3,RORB,CHRDL1,SH3PXD2B	4/414
14_Summary	GO Biological Processes	GO:0120035	regulation of plasma membrane bounded cell projection organization	-3.1672	-0.676192	577,818,1002,5587,9378,9760,55970	ADGRB3,CAMK2G,CDH4,PRKD1,NRXN1,TOX,GNG12	7/-
14_Member	GO Biological Processes	GO:0120035	regulation of plasma membrane bounded cell projection organization	-3.1672	-0.676192	577,818,1002,5587,9378,9760	ADGRB3,CAMK2G,CDH4,PRKD1,NRXN1,TOX	6/650
14_Member	GO Biological Processes	GO:0031344	regulation of cell projection organization	-3.10887	-0.647417	577,818,1002,5587,9378,9760	ADGRB3,CAMK2G,CDH4,PRKD1,NRXN1,TOX	6/667
14_Member	GO Biological Processes	GO:0010975	regulation of neuron projection development	-3.07112	-0.631949	577,818,1002,5587,9760	ADGRB3,CAMK2G,CDH4,PRKD1,TOX	5/448
14_Member	WikiPathways	WP536	Calcium regulation in cardiac cells	-2.68951	-0.39646	818,5587,55970	CAMK2G,PRKD1,GNG12	3/152
14_Member	WikiPathways	WP289	Myometrial relaxation and contraction pathways	-2.65745	-0.38337	818,5587,55970	CAMK2G,PRKD1,GNG12	3/156
15_Summary	GO Biological Processes	GO:0099173	postsynapse organization	-3.04813	-0.616869	1501,9378,91851,577	CTNND2,NRXN1,CHRDL1,ADGRB3	4/-
15_Member	GO Biological Processes	GO:0099173	postsynapse organization	-3.04813	-0.616869	1501,9378,91851	CTNND2,NRXN1,CHRDL1	3/114
15_Member	GO Biological Processes	GO:0050808	synapse organization	-2.49753	-0.265858	577,1501,9378,91851	ADGRB3,CTNND2,NRXN1,CHRDL1	4/368
16_Summary	Reactome Gene Sets	R-HSA-8980692	RHOA GTPase cycle	-2.94267	-0.56614	23092,57522,80243	ARHGAP26,SRGAP1,PREX2	3/-
16_Member	Reactome Gene Sets	R-HSA-8980692	RHOA GTPase cycle	-2.94267	-0.56614	23092,57522,80243	ARHGAP26,SRGAP1,PREX2	3/124
16_Member	Reactome Gene Sets	R-HSA-9013148	CDC42 GTPase cycle	-2.90298	-0.547489	23092,57522,80243	ARHGAP26,SRGAP1,PREX2	3/128
16_Member	Reactome Gene Sets	R-HSA-9013149	RAC1 GTPase cycle	-2.67337	-0.388007	23092,57522,80243	ARHGAP26,SRGAP1,PREX2	3/154
17_Summary	Reactome Gene Sets	R-HSA-1500931	Cell-Cell communication	-2.94267	-0.56614	1002,5747,27327,161742	CDH4,PTK2,TNRC6A,SPRED1	4/-
17_Member	Reactome Gene Sets	R-HSA-1500931	Cell-Cell communication	-2.94267	-0.56614	1002,5747,27327	CDH4,PTK2,TNRC6A	3/124
17_Member	Reactome Gene Sets	R-HSA-5683057	MAPK family signaling cascades	-2.05424	0	5747,27327,161742	PTK2,TNRC6A,SPRED1	3/257
18_Summary	GO Biological Processes	GO:0003018	vascular process in circulatory system	-2.93992	-0.56614	3269,6507,7082,53919,225,55532,55970	HRH1,SLC1A3,TJP1,SLCO1C1,ABCD2,SLC30A10,GNG12	7/-
18_Member	GO Biological Processes	GO:0003018	vascular process in circulatory system	-2.93992	-0.56614	3269,6507,7082,53919	HRH1,SLC1A3,TJP1,SLCO1C1	4/278
18_Member	Reactome Gene Sets	R-HSA-382551	Transport of small molecules	-2.33181	-0.163825	225,6507,53919,55532,55970	ABCD2,SLC1A3,SLCO1C1,SLC30A10,GNG12	5/663
18_Member	Reactome Gene Sets	R-HSA-425407	SLC-mediated transmembrane transport	-2.1808	-0.0533788	6507,53919,55532	SLC1A3,SLCO1C1,SLC30A10	3/231
19_Summary	GO Biological Processes	GO:0007200	phospholipase C-activating G protein-coupled receptor signaling pathway	-2.85518	-0.521517	2894,3269,5587	GRID1,HRH1,PRKD1	3/-
19_Member	GO Biological Processes	GO:0007200	phospholipase C-activating G protein-coupled receptor signaling pathway	-2.85518	-0.521517	2894,3269,5587	GRID1,HRH1,PRKD1	3/133
20_Summary	GO Biological Processes	GO:0007605	sensory perception of sound	-2.55903	-0.317139	4919,6507,152137	ROR1,SLC1A3,CCDC50	3/-
20_Member	GO Biological Processes	GO:0007605	sensory perception of sound	-2.55903	-0.317139	4919,6507,152137	ROR1,SLC1A3,CCDC50	3/169
20_Member	GO Biological Processes	GO:0050954	sensory perception of mechanical stimulus	-2.37838	-0.17917	4919,6507,152137	ROR1,SLC1A3,CCDC50	3/196

## Sheet: Pde4b module overlaps
22 overlapping genes between the mouse (oligo 5) hdWGCNA and human (oligo 4) hdWGCNA modules, and oligodendrocytes differentially expressed genes.
Dock10
Cdh20
Cdh19
Fnbp1
Fmnl2
Prr5l
Rassf2
Bcas1
Ugt8a
Slc24a2
Folh1
Dock1
Spock3
Gab1
Ppp2r3a
Trf
Cdk19
Erbin
Slain1
Enpp2
Megf10
Slc12a2

## Sheet: metascape Pd4b overlaps
GroupID	Category	Term	Description	LogP	Log(q-value)	Genes	Symbols	InTerm_InList
1_Summary	Reactome Gene Sets	R-HSA-9013148	CDC42 GTPase cycle	-3.97024	-0.0771321	23048,55619,114793,1793	FNBP1,DOCK10,FMNL2,DOCK1	4/-
1_Member	Reactome Gene Sets	R-HSA-9013148	CDC42 GTPase cycle	-3.97024	-0.0771321	23048,55619,114793	FNBP1,DOCK10,FMNL2	3/128
1_Member	Reactome Gene Sets	R-HSA-9012999	RHO GTPase cycle	-3.81734	-0.0771321	1793,23048,55619,114793	DOCK1,FNBP1,DOCK10,FMNL2	4/382
1_Member	Reactome Gene Sets	R-HSA-194315	Signaling by Rho GTPases	-3.06226	0	1793,23048,55619,114793	DOCK1,FNBP1,DOCK10,FMNL2	4/605
1_Member	Reactome Gene Sets	R-HSA-9716542	Signaling by Rho GTPases, Miro GTPases and RHOBTB3	-3.02533	0	1793,23048,55619,114793	DOCK1,FNBP1,DOCK10,FMNL2	4/619
2_Summary	GO Biological Processes	GO:0007043	cell-cell junction assembly	-3.95029	-0.0771321	7368,28316,28513,55619,9770,84466	UGT8,CDH20,CDH19,DOCK10,RASSF2,MEGF10	6/-
2_Member	GO Biological Processes	GO:0007043	cell-cell junction assembly	-3.95029	-0.0771321	7368,28316,28513	UGT8,CDH20,CDH19	3/130
2_Member	GO Biological Processes	GO:0045216	cell-cell junction organization	-3.50572	0	7368,28316,28513	UGT8,CDH20,CDH19	3/184
2_Member	GO Biological Processes	GO:0034330	cell junction organization	-3.17023	0	7368,28316,28513,55619	UGT8,CDH20,CDH19,DOCK10	4/566
2_Member	GO Biological Processes	GO:0034329	cell junction assembly	-2.87734	0	7368,28316,28513	UGT8,CDH20,CDH19	3/303
2_Member	GO Biological Processes	GO:0000902	cell morphogenesis	-2.8144	0	7368,28316,28513,55619	UGT8,CDH20,CDH19,DOCK10	4/706
2_Member	WikiPathways	WP5087	Pleural mesothelioma	-2.42067	0	9770,28316,28513	RASSF2,CDH20,CDH19	3/439
2_Member	GO Biological Processes	GO:0098609	cell-cell adhesion	-2.14683	0	28316,28513,84466	CDH20,CDH19,MEGF10	3/551
3_Summary	GO Biological Processes	GO:0098657	import into cell	-3.91684	-0.0771321	1793,6558,23048,25769,84466,5523	DOCK1,SLC12A2,FNBP1,SLC24A2,MEGF10,PPP2R3A	6/-
3_Member	GO Biological Processes	GO:0098657	import into cell	-3.91684	-0.0771321	1793,6558,23048,25769,84466	DOCK1,SLC12A2,FNBP1,SLC24A2,MEGF10	5/697
3_Member	GO Biological Processes	GO:0006897	endocytosis	-2.24413	0	1793,23048,84466	DOCK1,FNBP1,MEGF10	3/508
3_Member	GO Biological Processes	GO:0061061	muscle structure development	-2.19553	0	1793,5523,84466	DOCK1,PPP2R3A,MEGF10	3/529
4_Summary	GO Biological Processes	GO:0001932	regulation of protein phosphorylation	-2.96157	0	3567,5168,9770,79899	IL5,ENPP2,RASSF2,PRR5L	4/-
4_Member	GO Biological Processes	GO:0001932	regulation of protein phosphorylation	-2.96157	0	3567,5168,9770,79899	IL5,ENPP2,RASSF2,PRR5L	4/644
4_Member	GO Biological Processes	GO:0042325	regulation of phosphorylation	-2.84176	0	3567,5168,9770,79899	IL5,ENPP2,RASSF2,PRR5L	4/694
4_Member	GO Biological Processes	GO:0001934	positive regulation of protein phosphorylation	-2.49215	0	3567,5168,9770	IL5,ENPP2,RASSF2	3/414
4_Member	GO Biological Processes	GO:0042327	positive regulation of phosphorylation	-2.42623	0	3567,5168,9770	IL5,ENPP2,RASSF2	3/437
4_Member	GO Biological Processes	GO:0010562	positive regulation of phosphorus metabolic process	-2.2802	0	3567,5168,9770	IL5,ENPP2,RASSF2	3/493
4_Member	GO Biological Processes	GO:0045937	positive regulation of phosphate metabolic process	-2.2802	0	3567,5168,9770	IL5,ENPP2,RASSF2	3/493
4_Member	GO Biological Processes	GO:0031401	positive regulation of protein modification process	-2.09814	0	3567,5168,9770	IL5,ENPP2,RASSF2	3/574
5_Summary	GO Biological Processes	GO:0006935	chemotaxis	-2.73067	0	2549,5168,6558,1793	GAB1,ENPP2,SLC12A2,DOCK1	4/-
5_Member	GO Biological Processes	GO:0006935	chemotaxis	-2.73067	0	2549,5168,6558	GAB1,ENPP2,SLC12A2	3/341
5_Member	GO Biological Processes	GO:0042330	taxis	-2.72344	0	2549,5168,6558	GAB1,ENPP2,SLC12A2	3/343
5_Member	GO Biological Processes	GO:0040011	locomotion	-2.65008	0	2549,5168,6558	GAB1,ENPP2,SLC12A2	3/364
5_Member	GO Biological Processes	GO:0030335	positive regulation of cell migration	-2.04561	0	1793,2549,5168	DOCK1,GAB1,ENPP2	3/600

## Sheet: Microglial module genes
13 overlapping genes between M1-mouse and M1 human modules and DE genes			21 overlapping genes between M8-mouse and M5 human modules and DE genes
Kcnj3			Mgat4a
Ntng1			Srgap2
Zfp804b			Plxdc2
Dpp6			P2ry12
Mtus2			Mbnl1
Dync1i1			Cmklr1
Cntnap2			Hpgds
Grik2			Itpr2
Pcdh15			Mef2a
Rasgrf2			Zfhx3
Nalcn			Epb41l2
Epha6			Dock2
Robo2			Rad51b
			Lrmda
			Epsti1
			Otulin1
			Snx29
			P3h2
			Dock8
			Entpd1
			Blnk

## Sheet: metascape microglial 13 genes
GroupID	Category	Term	Description	LogP	Log(q-value)	Genes	Symbols	InTerm_InList
1_Summary	GO Biological Processes	GO:0050806	positive regulation of synaptic transmission	-4.43273	-0.780205	2898,5924,259232,22854,3760	GRIK2,RASGRF2,NALCN,NTNG1,KCNJ3	5/-
1_Member	GO Biological Processes	GO:0050806	positive regulation of synaptic transmission	-4.43273	-0.780205	2898,5924,259232	GRIK2,RASGRF2,NALCN	3/156
1_Member	GO Biological Processes	GO:0050804	modulation of chemical synaptic transmission	-4.27151	-0.780205	2898,5924,22854,259232	GRIK2,RASGRF2,NTNG1,NALCN	4/518
1_Member	GO Biological Processes	GO:0099177	regulation of trans-synaptic signaling	-4.26825	-0.780205	2898,5924,22854,259232	GRIK2,RASGRF2,NTNG1,NALCN	4/519
1_Member	Reactome Gene Sets	R-HSA-112314	Neurotransmitter receptors and postsynaptic signal transmission	-4.25493	-0.780205	2898,3760,5924	GRIK2,KCNJ3,RASGRF2	3/179
1_Member	Reactome Gene Sets	R-HSA-112315	Transmission across Chemical Synapses	-3.88293	-0.494903	2898,3760,5924	GRIK2,KCNJ3,RASGRF2	3/239
1_Member	Reactome Gene Sets	R-HSA-112316	Neuronal System	-3.32571	-0.12957	2898,3760,5924	GRIK2,KCNJ3,RASGRF2	3/370
1_Member	GO Biological Processes	GO:0042391	regulation of membrane potential	-3.0429	0	2898,3760,259232	GRIK2,KCNJ3,NALCN	3/463
2_Summary	GO Biological Processes	GO:0048812	neuron projection morphogenesis	-4.33803	-0.780205	6092,22854,26047,285220,65217	ROBO2,NTNG1,CNTNAP2,EPHA6,PCDH15	5/-
2_Member	GO Biological Processes	GO:0048812	neuron projection morphogenesis	-4.33803	-0.780205	6092,22854,26047,285220	ROBO2,NTNG1,CNTNAP2,EPHA6	4/498
2_Member	GO Biological Processes	GO:0120039	plasma membrane bounded cell projection morphogenesis	-4.32114	-0.780205	6092,22854,26047,285220	ROBO2,NTNG1,CNTNAP2,EPHA6	4/503
2_Member	GO Biological Processes	GO:0048858	cell projection morphogenesis	-4.29779	-0.780205	6092,22854,26047,285220	ROBO2,NTNG1,CNTNAP2,EPHA6	4/510
2_Member	KEGG Pathway	hsa04360	Axon guidance	-4.21938	-0.780205	6092,22854,285220	ROBO2,NTNG1,EPHA6	3/184
2_Member	GO Biological Processes	GO:0098742	cell-cell adhesion via plasma-membrane adhesion molecules	-3.76521	-0.463038	6092,22854,65217	ROBO2,NTNG1,PCDH15	3/262
2_Member	GO Biological Processes	GO:0000902	cell morphogenesis	-3.75189	-0.463038	6092,22854,26047,285220	ROBO2,NTNG1,CNTNAP2,EPHA6	4/706
2_Member	GO Biological Processes	GO:0031175	neuron projection development	-3.72612	-0.463038	6092,22854,26047,285220	ROBO2,NTNG1,CNTNAP2,EPHA6	4/717
2_Member	GO Biological Processes	GO:0007409	axonogenesis	-3.32571	-0.12957	6092,22854,285220	ROBO2,NTNG1,EPHA6	3/370
2_Member	GO Biological Processes	GO:0061564	axon development	-3.14471	0	6092,22854,285220	ROBO2,NTNG1,EPHA6	3/427
2_Member	GO Biological Processes	GO:0048667	cell morphogenesis involved in neuron differentiation	-3.08148	0	6092,22854,285220	ROBO2,NTNG1,EPHA6	3/449
2_Member	GO Biological Processes	GO:0098609	cell-cell adhesion	-2.82525	0	6092,22854,65217	ROBO2,NTNG1,PCDH15	3/551

## Sheet: metascape microglial 21 genes
GroupID	Category	Term	Description	LogP	Log(q-value)	Genes	Symbols	InTerm_InList
1_Summary	GO Biological Processes	GO:0071677	positive regulation of mononuclear cell migration	-4.48418	-0.141918	1240,64805,81704,463,3709,5890	CMKLR1,P2RY12,DOCK8,ZFHX3,ITPR2,RAD51B	6/-
1_Member	GO Biological Processes	GO:0071677	positive regulation of mononuclear cell migration	-4.48418	-0.141918	1240,64805,81704	CMKLR1,P2RY12,DOCK8	3/95
1_Member	GO Biological Processes	GO:0071675	regulation of mononuclear cell migration	-3.91128	-0.136824	1240,64805,81704	CMKLR1,P2RY12,DOCK8	3/148
1_Member	GO Biological Processes	GO:0002687	positive regulation of leukocyte migration	-3.87703	-0.136824	1240,64805,81704	CMKLR1,P2RY12,DOCK8	3/152
1_Member	GO Biological Processes	GO:0002685	regulation of leukocyte migration	-3.3161	0	1240,64805,81704	CMKLR1,P2RY12,DOCK8	3/236
1_Member	GO Biological Processes	GO:0045785	positive regulation of cell adhesion	-2.38567	0	463,64805,81704	ZFHX3,P2RY12,DOCK8	3/499
1_Member	Reactome Gene Sets	R-HSA-109582	Hemostasis	-2.30131	0	3709,5890,64805	ITPR2,RAD51B,P2RY12	3/535
1_Member	GO Biological Processes	GO:0030335	positive regulation of cell migration	-2.16352	0	1240,64805,81704	CMKLR1,P2RY12,DOCK8	3/600
1_Member	GO Biological Processes	GO:2000147	positive regulation of cell motility	-2.10532	0	1240,64805,81704	CMKLR1,P2RY12,DOCK8	3/630
1_Member	GO Biological Processes	GO:0040017	positive regulation of locomotion	-2.07552	0	1240,64805,81704	CMKLR1,P2RY12,DOCK8	3/646
1_Member	Reactome Gene Sets	R-HSA-372790	Signaling by GPCR	-2.07185	0	1240,3709,64805	CMKLR1,ITPR2,P2RY12	3/648
2_Summary	GO Biological Processes	GO:0001775	cell activation	-3.96952	-0.136824	953,1794,29760,64805,81704,23380	ENTPD1,DOCK2,BLNK,P2RY12,DOCK8,SRGAP2	6/-
2_Member	GO Biological Processes	GO:0001775	cell activation	-3.96952	-0.136824	953,1794,29760,64805,81704	ENTPD1,DOCK2,BLNK,P2RY12,DOCK8	5/754
2_Member	GO Biological Processes	GO:0051056	regulation of small GTPase mediated signal transduction	-3.00153	0	1794,23380,81704	DOCK2,SRGAP2,DOCK8	3/303
2_Member	GO Biological Processes	GO:0046649	lymphocyte activation	-2.37357	0	1794,29760,81704	DOCK2,BLNK,DOCK8	3/504
2_Member	GO Biological Processes	GO:0045321	leukocyte activation	-2.1129	0	1794,29760,81704	DOCK2,BLNK,DOCK8	3/626
3_Summary	GO Biological Processes	GO:0061061	muscle structure development	-3.44723	0	463,1794,4154,4205,2037,23380	ZFHX3,DOCK2,MBNL1,MEF2A,EPB41L2,SRGAP2	6/-
3_Member	GO Biological Processes	GO:0061061	muscle structure development	-3.44723	0	463,1794,4154,4205	ZFHX3,DOCK2,MBNL1,MEF2A	4/529
3_Member	GO Biological Processes	GO:0030029	actin filament-based process	-3.19809	0	1794,2037,4205,23380	DOCK2,EPB41L2,MEF2A,SRGAP2	4/616
3_Member	GO Biological Processes	GO:0030036	actin cytoskeleton organization	-2.27675	0	1794,2037,4205	DOCK2,EPB41L2,MEF2A	3/546
