# Supplementary material for: Conserved Cell-Type-Specific Transcriptomic Networks and Regulatory Programs Underlie Alcohol Dependence Across Mouse and Human
Source: Research Square preprint supplement (doi:10.21203/rs.3.rs-9417955/v1), 2026-04-21
Supplement: Supplementary file 3 [file a13719305ac844d481470467.xlsx]

## Sheet: Inhib_A
source_label	n_targets	%_upregulated	%_downregulated	4933406I18Rik	A830036E02Rik	Adcy8	Aebp1	Agbl4	Aldoc	Arx	Atp1b2	Bbs9	C130073E24Rik	Chd7	Chrm2	Clic4	Cntn4	Cntnap3	Colec12	Cst3	Dpp6	Dync1i1	Eepd1	Egr1	Enc1	Etv1	Fat1	Gabra5	Gad2	Gm2115	Gm26871	Gm28175	Gm32647	Gng4	Gpr137c	Grid2	Hcrtr2	Hecw1	Hmgb3	Hs3st4	Hs3st5	Hs6st2	Htra1	Il1rapl2	Inpp4b	Itgav	Itgb8	Kcnb2	Kcnd2
Mef2c	38	39.5	60.5			↓		↑	↓		↓		↓			↓						↓	↓			↓					↑			↓			↑	↑		↑				↓	↓				↓
Nr3c1	35	31.4	68.6							↓			↓		↓		↑			↓	↓	↓			↑	↓						↑					↑	↑				↓		↓	↓		↓
Maf*	34	41.2	58.8			↓	↓	↑		↓	↓						↑					↓				↓			↓	↑		↑			↓		↑		↓		↓
Zeb1	34	35.3	64.7						↓		↓			↓		↓		↓	↓			↓							↓				↓						↓	↑
Bcl11a	33	27.3	72.7			↓										↓	↑			↓			↓			↓			↓			↑	↓		↓				↓		↓				↓	↓
Sp8*	30	26.7	73.3	↑		↓	↓			↓		↑									↓	↓						↓	↓						↓		↑											↓	↓
Pbx3*	29	37.9	62.1			↓		↑					↓			↓				↓							↓		↓			↑			↓					↑									↓
Tcf12	29	37.9	62.1	↑							↓		↓				↑				↓	↓	↓	↑	↑									↓						↑					↓			↓
Fosl2	28	39.3	60.7					↑			↓						↑												↓			↑					↑	↑					↓	↓				↓
Sp9	27	40.7	59.3	↑		↓		↑				↑								↓	↓	↓		↑							↑				↓								↓						↓
Mef2a	26	26.9	73.1					↑			↓		↓					↓				↓	↓								↑			↓	↓								↓	↓	↓		↓		↓
Nr3c2	22	40.9	59.1		↓			↑														↓							↓		↑				↓	↑			↓			↓					↓
Ppargc1a*	22	18.2	81.8						↓		↓		↓	↓			↑			↓		↓			↑				↓					↓							↓						↓
Fosb	21	23.8	76.2										↓			↓	↑																					↑			↓			↓				↓
Npas1*	21	28.6	71.4			↓	↓														↓			↑		↓					↑				↓	↑							↓				↓
Pou3f2	21	38.1	61.9		↓			↑						↓			↑	↓					↓			↓										↑	↑							↓
Creb5	20	45	55								↓						↑								↑				↓								↑						↓					↓
Ets1	20	35	65			↓		↑			↓						↑						↓					↓						↓	↓					↑					↓
Sox1*	20	40	60							↓		↑	↓	↓			↑										↓									↑											↓
Thrb*	20	45	55					↑			↓	↑	↓				↑												↓					↓					↓			↓							↓
[truncated: 54 more columns]

## Sheet: Inhib_B
source_label	n_targets	%_upregulated	%_downregulated	6330411D24Rik	A830036E02Rik	Adamts3	Adcy8	Airn	Angpt1	C130073E24Rik	Cdh8	Celf5	Clic4	Cntn6	Cntnap2	Cntnap5a	Ctnnd2	Cux1	Dlx6	Dnah7b	Eepd1	Elfn1	Epha3	Eya4	Fam163a	Frmd5	Gab1	Gldc	Gm1604a	Gm16083	Gm20754	Gm47710	Gng4	Grid2	Grin3a	Grm5	Hip1	Hmgb3	Hs3st5	Htr1b	Ikzf2	Il1rapl2	Inpp4b	Itgav	Kcnc2	Kirrel	Kitl	Krt12	Lgr5
Mef2c	44	47.7	52.3	↑		↓	↓		↓	↓	↑			↑		↑			↑	↓	↓	↑		↑						↑	↑		↓	↑	↑				↓		↓	↑	↓	↓		↑	↓
Maf	32	56.2	43.8	↑		↓				↓	↑	↑			↑		↑	↓						↑	↓				↑		↑	↓	↓		↑		↓	↓									↓
Mafb	30	43.3	56.7	↑		↓	↓	↓		↓	↑	↑			↑			↓											↑		↑	↓				↑	↓	↓			↓						↓
Mef2a	27	59.3	40.7								↑							↓												↑	↑	↓		↑	↑		↓					↑	↓			↑	↓
Bcl11a	26	57.7	42.3					↓								↑			↑	↓	↓	↑		↑					↑			↓			↑						↓
Nr4a2	25	40	60					↓				↑	↓	↑		↑		↓			↓			↑		↑	↓					↓	↓										↓						↓
Npas3*	24	54.2	45.8	↑								↑	↓						↑				↓						↑	↑												↑		↓		↑
Creb5*	21	47.6	52.4	↑								↑		↑																↑			↓				↓					↑	↓	↓	↑
Jund	21	47.6	52.4	↑						↓	↑								↑		↓			↑							↑							↓				↑	↓				↓
Ar	20	60	40	↑							↑		↓		↑							↑			↓					↑	↑				↑		↓
Klf3	19	47.4	52.6	↑						↓	↑	↑	↓	↑		↑		↓			↓	↑		↑									↓		↑
Creb3l2	18	50	50			↓							↓												↓																					↑	↓
Klf5	18	50	50				↓			↓	↑	↑	↓			↑					↓			↑	↓												↓	↓		↑
Pou2f1	17	64.7	35.3												↑									↑							↑		↓	↑			↓			↑		↑		↓
Pou2f2	17	41.2	58.8	↑				↓				↑	↓										↓											↑				↓					↓
Sox2	17	52.9	47.1								↑																								↑			↓			↓			↓			↓
Cebpb	16	43.8	56.2		↓																							↓	↑				↓					↓	↓			↑				↑
Foxn3	16	50	50							↓	↑	↑		↑				↓					↓						↑									↓
Nr3c1	16	43.8	56.2											↑									↓						↑	↑		↓					↓				↓		↓	↓		↑
Rora*	16	43.8	56.2	↑		↓													↑					↑						↑				↑			↓		↓								↓	↓
[truncated: 38 more columns]

## Sheet: Inhib_C
source_label	n_targets	%_upregulated	%_downregulated	A830036E02Rik	Adamts3	Adamts5	Adarb2	Adcy8	Airn	Ano3	Arx	Atp6ap1l	Auts2	C130073E24Rik	Cadps2	Cdh8	Celf5	Cntn6	Cntnap3	Cntnap5c	Cpa6	Cux1	Dgkb	Dleu2	Dync1i1	Edaradd	Edil3	Egfem1	Elavl2	Ell2	Elmod1	Enc1	Enox2	Epha3	Epha5	Epha6	Epha7	Eya1	Eya4	Fam163a	Frmd3	Frmd5	Gabra5	Glra2	Glra3	Gm16083	Gm26691	Gm26871	Gm28175
Mef2a	58	53.4	46.6	↓				↓	↓	↓		↓	↓	↓		↑		↑		↑		↓	↓		↓		↑	↑			↑		↓	↓	↓	↓	↑					↑		↑	↑		↓
Mef2c	57	49.1	50.9	↓				↓	↓	↓		↓	↓	↓				↑		↑			↓	↓			↑	↑	↑	↓		↑			↓	↓							↓	↑	↑	↑		↑
Bcl11a	50	60	40				↑	↓		↓	↓					↑	↑	↑		↑				↓	↓	↑		↑			↑	↑				↓				↓		↑			↑		↓
Tcf12	46	54.3	45.7	↓	↓				↓	↓				↓				↑				↓		↓	↓						↑			↓	↓	↓								↑			↓	↑
Sp8*	42	54.8	45.2	↓	↓		↑	↓												↑					↓				↑	↓	↑			↓	↓				↓	↓						↑	↓	↑
Maf	40	60	40	↓				↓			↓		↓				↑	↑		↑				↓			↑	↑	↑	↓						↓				↓		↑	↓	↑					↑
Pou3f3	39	66.7	33.3				↑											↑		↑					↓		↑			↓	↑				↓		↑						↓		↑	↑		↑	↑
Nr3c1*	37	56.8	43.2					↓				↓			↑	↑				↑		↓						↑								↓						↑	↓						↑
Pax6*	36	55.6	44.4	↓	↓		↑	↓			↓					↑					↓					↑		↑		↓		↑				↓		↓					↓		↑				↑
Nr3c2	35	48.6	51.4		↓		↑		↓		↓	↓		↓						↑															↓	↓				↓				↑
Mafb	34	50	50	↓							↓	↓						↑		↑				↓			↑	↑		↓	↑										↓			↑		↑			↑
Rxra	34	50	50	↓				↓		↓		↓			↑			↑		↑			↓									↑	↓		↓								↓
Npas3*	33	51.5	48.5	↓	↓						↓						↑			↑											↑									↓	↓		↓	↑			↓	↑	↑
Ar	32	59.4	40.6								↓	↓		↓		↑									↓		↑			↓	↑											↑	↓					↑
Sp9*	32	68.8	31.2								↓						↑					↓										↑														↑			↑
Thrb*	31	51.6	48.4									↓												↓			↑	↑						↓	↓	↓					↓					↑		↑
Egr1	30	50	50			↓		↓				↓			↑										↓							↑									↓		↓
Sox1	30	43.3	56.7																↓						↓		↑	↑		↓					↓					↓			↓
Fos	28	42.9	57.1	↓	↓						↓	↓		↓				↑		↑		↓	↓	↓	↓																						↓		↑
Jund	28	57.1	42.9														↑	↑												↓							↑			↓	↓							↑
[truncated: 81 more columns]

## Sheet: Inhib_D
source_label	n_targets	%_upregulated	%_downregulated	2010300C02Rik	6330411D24Rik	A330049N07Rik	Adgrb3	Agbl4	Airn	Aldoc	Angpt1	Antxr2	Atp1b2	C130073E24Rik	Chd7	Cntnap2	Cntnap5a	Cntnap5c	Csmd1	Ddn	Dsc3	Dync1i1	Edil3	Elfn1	Epb41	Epha3	Etv1	Fam163b	Fat1	Frmd5	Gab2	Gabra2	Gabra5	Galntl6	Gm13629	Gm15155	Gm1604a	Gm17750	Gng4	Gpr137c	Itgav	Kcnab1	Kcnc2	Kcnd2	Lgr5	Lhfpl3	Lhx6	Lin28b	Lrfn5
Mef2c	36	47.2	52.8		↑		↑				↓			↓			↑	↑	↑			↓		↑			↓	↓				↓			↑				↓	↓	↓			↓		↓	↑	↑	↑
Maf*	26	65.4	34.6		↑			↑						↓		↑		↑		↓		↓	↑									↓			↑		↑		↓								↑
Mafb	26	57.7	42.3		↑				↓			↑		↓		↑		↑	↑	↓	↑		↑					↓				↓	↓				↑									↓	↑
Bcl11a	24	50	50						↓	↓		↑					↑						↑	↑			↓	↓				↓		↑			↑
Mef2a	23	60.9	39.1	↓				↑				↑	↓						↑			↓												↑						↓						↓			↑
Npas3*	22	40.9	59.1		↑								↓					↑					↑			↓					↑	↓					↑				↓			↓
Nr4a2	22	50	50			↑			↓	↓		↑					↑										↓			↑		↓		↑					↓						↓	↓
Creb5	21	47.6	52.4		↑													↑									↓				↑	↓		↑				↓	↓	↓	↓		↑	↓
Ets1	21	47.6	52.4							↓		↑	↓														↓	↓			↑	↓			↑
Nr3c1*	21	42.9	57.1							↓		↑	↓					↑		↓			↑			↓	↓	↓									↑				↓	↑		↓					↑
Stat3	21	52.4	47.6		↑			↑		↓		↑					↑	↑		↓					↑							↓														↓	↑
Cebpb	19	42.1	57.9										↓							↓			↑				↓				↑				↑		↑		↓	↓				↓
Jund	19	57.9	42.1	↓	↑									↓				↑					↑		↑			↓							↑									↓
Klf12	19	57.9	42.1		↑			↑					↓												↑			↓																↓				↑
Klf3	19	42.1	57.9		↑								↓	↓			↑							↑	↑							↓							↓	↓
Klf7	18	61.1	38.9					↑						↓	↓		↑						↑		↑			↓																			↑
Pou2f1	18	44.4	55.6					↑				↑				↑		↑									↓				↑		↓						↓	↓	↓			↓		↓			↑
Sox1	18	38.9	61.1									↑		↓			↑	↑					↑			↓	↓		↓							↓						↑		↓				↑
Esrrg	17	52.9	47.1		↑					↓		↑	↓								↑				↑							↓							↓								↑
Lhx6*	17	47.1	52.9									↑	↓					↑								↓	↓												↓		↓					↓
[truncated: 41 more columns]

## Sheet: Inhib_E
source_label	n_targets	%_upregulated	%_downregulated	2610316D01Rik	Adamtsl3	Adcy8	B230209E15Rik	Bmerb1	Cst3	Ddn	Dhrs3	Elfn1	Eya1	Ezr	Gm26512	Gng12	Grin3a	Hs3st4	Htr2c	Itgav	Lgr5	Lrrc3b	Mcc	Mei4	Mmp16	Ndrg2	Ntng1	Prkd3	Ptchd1	Rit2	Rspo3	Scg2	Scrg1	Sdk1	Slc35f1	Slc7a14	Tll1	Trhr	Unc13c	Vwc2l	Wif1	Zbtb20	Zfp804b	Zfpm2
Bcl11a	19	57.9	42.1			↓	↑			↓							↑		↑	↓		↑		↑	↑	↓			↑	↑		↓		↑	↑	↑	↓					↓	↓
Mef2c	16	68.8	31.2			↓		↑									↑	↑	↑	↓		↑	↑	↑	↑		↓		↑	↑		↓			↑								↓
Nr3c2	16	56.2	43.8					↑		↓					↓		↑	↑		↓					↑				↑	↑			↓	↑	↑			↑			↓	↓	↓
Nr3c1	15	53.3	46.7			↓				↓	↓				↓		↑					↑	↑		↑				↑	↑	↓	↓		↑									↓	↑
Sp8	15	46.7	53.3	↑		↓				↓					↓		↑					↑				↓		↓					↓	↑	↑	↑		↑			↓	↓
Pou3f3	13	61.5	38.5									↑					↑					↑	↑					↓		↑		↓	↓		↑	↑	↓						↓	↑
Maf*	12	66.7	33.3			↓	↑		↓	↓								↑				↑			↑				↑	↑					↑	↑						↓
Ar	11	54.5	45.5							↓							↑	↑								↓			↑				↓	↑		↑		↑			↓	↓
Mef2a	11	63.6	36.4			↓		↑		↓							↑	↑			↓	↑			↑					↑					↑								↓
Egr1	10	50	50	↑		↓									↓		↑	↑														↓				↑	↓						↓	↑
Mafb	10	50	50							↓											↓	↑							↑	↑		↓			↑	↑					↓	↓
Rxrg	10	60	40	↑																↓		↑				↓			↑	↑				↑		↑	↓						↓
Sp9	10	70	30	↑					↓							↑	↑																↓	↑		↑		↑				↓		↑
Tcf12	10	80	20				↑			↓	↓						↑	↑				↑	↑						↑	↑					↑
Cux2	9	88.9	11.1														↑	↑				↑		↑	↑					↑					↑					↑			↓
Nfia	9	66.7	33.3				↑	↑														↑											↓		↑	↑						↓	↓	↑
Npas2	9	33.3	66.7		↓	↓		↑						↓		↑					↓	↑										↓					↓
Pax6*	9	44.4	55.6			↓							↓		↓			↑				↑										↓		↑	↑								↓
Sox1	9	44.4	55.6					↑											↑				↑					↓			↓	↓	↓		↑							↓
Npas1*	8	50	50			↓									↓			↑				↑		↑				↓											↑			↓

## Sheet: Inhib_F
source_label	n_targets	%_upregulated	%_downregulated	Adamts5	Adcy8	Airn	Alcam	Ano3	Arx	Bbx	Bmp3	Ccnd2	Clstn3	Cpa6	Crim1	Cux1	Disp2	Dlx5	Dpy19l1	Dync1i1	Edaradd	Elk1	Enc1	Epha3	Epha6	Fam163a	Frmd3	Gm46102	Gm47710	Gng4	Golim4	Gpr137c	Grid2	Hs6st2	Il1rapl1	Inpp4b	Kcnd2	Kcnj3	Lgr5	Lix1	Luzp2	Lynx1	Maml2	Nxph3	Pcdh19	Pclo	Prkcg	Qrfpr	Rspo3
Bcl11a	27	33.3	66.7		↓		↑	↓	↓	↓		↑								↓	↑		↑		↓	↓		↓	↓		↓									↓	↓	↑				↑
Mef2a	27	37	63		↓	↓	↑	↓		↓		↑			↑	↓	↑			↓				↓	↓			↓		↓	↓						↓	↓	↓		↓				↑	↑
Mef2c	26	30.8	69.2		↓	↓	↑	↓				↑			↑								↑		↓			↓	↓	↓			↑			↓		↓		↓	↓	↑	↓
Egr1	23	47.8	52.2	↓	↓		↑				↑	↑	↑		↑					↓			↑				↓						↑	↓				↓		↓	↓	↑	↓
Nr3c1	23	43.5	56.5		↓		↑				↑	↑	↑			↓									↓			↓		↓	↓	↓	↑									↑					↑		↓
Sp8	23	43.5	56.5		↓		↑			↓	↑	↑					↑			↓		↑		↓		↓				↓		↓		↓		↓		↓			↓		↓				↑
Tcf12	21	47.6	52.4			↓	↑	↓				↑			↑	↓	↑			↓				↓	↓					↓												↑	↓				↑
Ar*	20	40	60						↓	↓			↑					↓	↑	↓										↓	↓		↑							↓	↓			↑			↑
Rxra	20	50	50		↓		↑	↓		↓	↑	↑			↑		↑	↓	↑			↑	↑							↓	↓					↓	↓				↓	↑					↑
Maf*	19	26.3	73.7		↓				↓		↑		↑					↓							↓	↓		↓		↓							↓	↓			↓
Mafb	19	26.3	73.7						↓				↑					↓	↑								↓		↓			↓					↓	↓	↓		↓					↑
Pax6*	19	42.1	57.9		↓				↓			↑	↑	↓							↑		↑		↓			↓	↓				↑					↓			↓
Sp9*	19	36.8	63.2						↓						↑	↓							↑							↓				↓			↓	↓			↓		↓					↑
Zeb1	18	44.4	55.6					↓	↓		↑	↑			↑		↑			↓					↓		↓										↓		↓		↓	↑
Nr3c2	17	41.2	58.8			↓	↑		↓	↓		↑							↑						↓	↓					↓		↑					↓							↑
Pou2f2	17	29.4	70.6									↑	↑				↑	↓	↑	↓										↓			↑		↓					↓	↓		↓
Pou2f1*	16	25	75		↓		↑		↓			↑								↓					↓		↓	↓			↓		↑										↓
Ppargc1a*	15	46.7	53.3							↓	↑				↑			↓		↓			↑		↓											↓						↑						↑
Cebpb	14	42.9	57.1							↓	↑	↑										↑	↑		↓			↓			↓	↓			↓							↑
Sox1	14	14.3	85.7															↓	↑	↓						↓		↓		↓			↑			↓	↓				↓								↓
[truncated: 17 more columns]

## Sheet: Excit_A
source_label	n_targets	%_upregulated	%_downregulated	Abat	Abi3bp	Adarb2	Adcy8	Brinp3	Cdh18	Celf5	Disp2	Egr1	Epha6	Fat1	Fgf13	Gad2	Gm46102	Gng12	Golim4	Gpc4	Gpr137c	Hmgb3	Il17ra	Itgav	Lhfpl3	Mmp16	Mpp7	Nxph3	Pcdh11x	Pde1c	Pgap1	Plppr1	Rab27b	Rgs20	Rspo3	Scg2	Slc7a14	Slc8a3	Trpc7	Zfp804b
Mef2c	20	25	75			↓	↓	↓	↑	↑			↓	↓				↑	↓		↓			↓	↓			↑	↓		↓		↑		↓	↓			↓	↓
Nr3c1	14	21.4	78.6					↓	↑			↑			↓		↓				↓	↓	↑	↓	↓				↓	↓	↓									↓
Egr1*	11	9.1	90.9			↓		↓	↑				↓	↓	↓	↓					↓			↓					↓	↓
Maf	11	18.2	81.8	↓	↓		↓												↓					↓					↓					↑		↓	↑	↓		↓
Rreb1	11	36.4	63.6									↑					↓	↑			↓		↑							↓				↑	↓	↓		↓	↓
Zeb1	11	45.5	54.5				↓	↓	↑		↑										↓	↓	↑	↓									↑	↑				↓
Bhlhe40*	10	30	70								↑						↓				↓	↓			↓				↓	↓	↓			↑			↑
Pou2f2	10	30	70					↓	↑					↓								↓			↓				↓					↑		↓	↑			↓
Bhlhe41	9	22.2	77.8				↓										↓				↓		↑		↓				↓	↓	↓			↑
Cebpb	9	44.4	55.6					↓	↑									↑					↑		↓		↓	↑			↓					↓
Fos	9	22.2	77.8					↓				↑			↓		↓					↓		↓			↓						↑			↓
Klf13	9	33.3	66.7	↓				↓				↑					↓				↓		↑							↓			↑			↓
Neurod1	9	33.3	66.7		↓		↓				↑													↓	↓	↑		↑										↓		↓
Bhlhe22	8	25	75	↓					↑								↓						↑		↓							↓			↓	↓
Fosl2	8	25	75				↓	↓										↑	↓					↓	↓			↑	↓
Foxo1	8	37.5	62.5	↓						↑			↓					↑			↓		↑													↓		↓
Jun	8	12.5	87.5	↓				↓															↑	↓					↓		↓				↓					↓
Lhx2	8	37.5	62.5					↓	↑				↓					↑		↓	↓												↑							↓
Nfatc2	8	37.5	62.5	↓				↓	↑				↓					↑											↓					↑	↓
Nr4a1	8	37.5	62.5				↓	↓	↑																↓	↑								↑		↓				↓

## Sheet: Excit_B
source_label	n_targets	%_upregulated	%_downregulated	Abi3bp	Adcy8	Adcyap1	Aff2	Brinp3	Celf5	Cntnap5c	Disp2	Dleu2	Egr1	Etv1	Foxn2	Gm26691	Gpc4	Gpr137c	Megf11	Minar2	Nckap5	Nhs	Reln	Smoc1	Spry2	Tmem255a	Trpm3	Tsc22d3	Vwc2l	Wls	Wnt5a	Zfp467
Fos	12	25	75	↓	↓	↓		↓		↓	↑		↑			↓			↓	↓			↓		↑
Egr1*	11	27.3	72.7		↓		↑				↑	↓		↓								↓		↓	↑	↓	↓				↓
Klf5	11	36.4	63.6			↓	↑	↓		↓	↑		↑				↓		↓		↑						↓	↓
Fosl2	10	50	50		↓	↓	↑		↑		↑		↑	↓				↓	↓						↑
Klf7	10	30	70		↓	↓		↓		↓	↑	↓		↓		↓					↑				↑
Mef2c	9	22.2	77.8	↓	↓		↑	↓						↓		↓		↓												↓		↑
Rfx3	9	44.4	55.6			↓		↓	↑	↓			↑					↓			↑	↓			↑
Bhlhe40	8	37.5	62.5	↓	↓	↓					↑	↓	↑												↑			↓
E2f3	8	37.5	62.5					↓			↑		↑					↓	↓	↓	↑							↓
Mxi1	8	25	75			↓	↑	↓		↓			↑		↓			↓		↓
Nrf1	8	25	75		↓		↑	↓		↓			↑						↓				↓					↓
Pou2f2	8	25	75					↓	↑		↑			↓					↓	↓							↓			↓
Bhlhe22	7	42.9	57.1		↓		↑			↓				↓									↓		↑							↑
Cebpb	7	14.3	85.7		↓									↓					↓	↓			↓		↑			↓
Egr4	7	14.3	85.7		↓	↓						↓	↑	↓					↓	↓
Etv5	7	42.9	57.1		↓			↓				↓	↑								↑							↓	↑
Klf12	7	28.6	71.4		↓						↑	↓		↓				↓							↑			↓
Npas3	7	28.6	71.4		↓									↓						↓						↓	↓		↑			↑
Zbtb16	7	28.6	71.4		↓	↓		↓		↓											↑		↓		↑
Bcl11b	6	16.7	83.3	↓	↓					↓		↓													↑					↓

## Sheet: Excit_C
source_label	n_targets	%_upregulated	%_downregulated	3110039M20Rik	Abi3bp	Adamts17	Aldoc	Ccdc80	Celf5	Chd7	Cst3	Disp2	Etv1	Gpr137c	Grik1	Hpcal1	Hs3st3a1	Htra1	Mmd	Mmp16	Nptx2	Pappa	Pbx3	Rasgef1a	Rgs20	Rspo3	Scg2	Slc8a3	Smad3	Susd5	Tshz2	Wls
Jun	11	36.4	63.6	↑	↓					↓			↓			↓		↓					↓	↑	↑	↓			↑
Nfib	10	50	50		↓	↑							↓		↓				↑	↑				↑	↑	↓		↓
Egr4	8	62.5	37.5			↑						↑	↓								↓				↑				↑	↑	↓
Hey1	8	50	50									↑	↓	↓						↑				↑	↑			↓				↓
Nfatc2*	8	25	75								↓		↓		↓						↓		↓				↓		↑	↑
Nfkb1	8	37.5	62.5	↑											↓	↓				↑					↑	↓		↓				↓
Ar	7	0	100											↓	↓	↓					↓					↓		↓				↓
Fosb	7	14.3	85.7					↓								↓					↓							↓		↑	↓	↓
Pou3f1	7	14.3	85.7		↓	↑				↓				↓	↓												↓				↓
Ppargc1a	7	28.6	71.4									↑			↓	↓	↓											↓		↑	↓
Rfx3	7	28.6	71.4						↑					↓				↓	↑		↓						↓	↓
Rora	7	71.4	28.6			↑	↓													↑				↑	↑				↑		↓
Egr3*	6	66.7	33.3						↑			↑									↓			↑					↑		↓
Fezf2	6	0	100					↓					↓		↓								↓			↓	↓
Maf	6	33.3	66.7											↓							↓				↑		↓		↑		↓
Nfia	6	50	50			↑							↓		↓					↑									↑		↓
Bach2	5	40	60			↑							↓	↓				↓		↑
Fosl2	5	80	20								↓									↑				↑	↑				↑
Foxo1	5	20	80											↓														↓	↑		↓	↓
Hivep2	5	20	80												↓						↓	↓		↑				↓

## Sheet: Excit_D
source_label	n_targets	%_upregulated	%_downregulated	Abat	Acss1	Adarb2	Aff2	Atp1b2	Atp8b1	Bbs9	Brinp3	Calb1	Col8a1	Cst3	Cux1	Ddn	Fat1	Fgf13	Gad2	Hgf	Hmgb3	Htra1	Inpp4b	Itgav	Lhfpl3	Luzp2	Meis2	Nptx2	Pbx3	Pcdh11x	Rab27b	Rspo3	Scg2	Slc8a3	Syn3	Trpc5	Tsc22d3	Unc5c	Vxn	Zbtb20
Hey1	14	7.1	92.9						↓		↓				↓	↓		↓			↓					↓	↓			↓				↓	↓	↑	↓			↓
Fosb	13	23.1	76.9					↓	↓	↑		↓	↑		↓									↓	↓		↓	↓						↓	↓				↑
Jun	13	23.1	76.9						↓			↓				↓	↓					↓					↓		↓	↓	↑	↓				↑			↑	↓
Nfatc2*	12	25	75				↑			↑	↓			↓	↓		↓	↓		↑								↓	↓				↓				↓
Cebpb	11	27.3	72.7			↓			↓	↑				↓				↓		↑				↓					↓	↓					↓				↑
Egr4	11	18.2	81.8			↓		↓	↓		↓		↑			↓					↓				↓			↓											↑	↓
Nfkb1	11	9.1	90.9		↓					↑		↓				↓		↓			↓				↓					↓		↓		↓						↓
Bcl11a	10	20	80					↓							↓	↓									↓	↓	↓	↓			↑				↓				↑
Pou2f2	10	40	60							↑			↑								↓					↓	↓			↓	↑				↓	↑				↓
Rfx3	10	10	90					↓				↓			↓							↓						↓					↓	↓	↓	↑				↓
Tcf12	10	30	70							↑		↓	↑	↓										↓	↓			↓		↓						↑	↓
Klf5	9	11.1	88.9		↓					↑		↓			↓													↓		↓		↓	↓				↓
Klf7	9	11.1	88.9	↓								↓			↓					↑	↓						↓	↓		↓			↓
Mef2c	9	22.2	77.8					↓	↓			↓	↑		↓								↓					↓			↑									↓
Nfib	9	22.2	77.8					↓			↓	↓								↑			↓				↓				↑	↓		↓
Nr3c1	9	55.6	44.4							↑					↓	↓										↓					↑		↓			↑		↑	↑
Pgr	9	44.4	55.6							↑		↓						↓		↑	↓															↑	↓		↑	↓
Smad1	9	11.1	88.9				↑					↓		↓		↓	↓	↓							↓			↓									↓
Zeb1	9	22.2	77.8					↓	↓					↓		↓		↓	↓					↓							↑								↑
Egr1	8	50	50									↓	↑		↓													↓			↑					↑			↑	↓

[truncated: 5 more sheets: Excit_E, Excit_F, Astro, Oligo, Micro]
