# Supplementary material for: Conserved Cell-Type-Specific Transcriptomic Networks and Regulatory Programs Underlie Alcohol Dependence Across Mouse and Human
Source: Research Square preprint supplement (doi:10.21203/rs.3.rs-9417955/v1), 2026-04-21
Supplement: Supplementary file 4 [file b0d9b4982917e7c934d6edb8.xlsx]

## Sheet: Ast1
source_label	n_targets	%_upregulated	%_downregulated	AAMP	ABCC9	ABCG1	ADAMTSL4-AS1	ADCY8	AGTPBP1	AHNAK	ALCAM	ALDH1L1	ANGPTL4	ANKRD11	ANKS1A	AP3B1	APOLD1	ARFGEF2	ARPC3	ARRDC4	ARSF	ATP11A	ATP1B2	ATP1B3	ATP6V1H	BAG4	BIRC3	BLVRA	BLVRB	BTG3	C1QL3	C2CD2	C2orf72	CA12	CALD1	CASTOR3	CBFB	CCDC80	CCND3	CD44	CDC123	CDC42BPB	CDH19	CEP85L	CFAP221	CHKA	CHST7	CHST8	CLIC5
NFIC	45	40	60					↓				↑	↑										↓										↓	↑		↑		↓		↑				↓
ZNF148	37	45.9	54.1		↓							↑											↓										↓	↑				↓		↑				↓
ELF1	36	66.7	33.3			↑									↓	↑	↑					↑	↓														↑		↑			↑				↓
FLI1	34	88.2	11.8											↑	↓			↑	↑							↑													↑										↑
SREBF1	32	68.8	31.2	↑						↑			↑										↓			↑							↓
SOX10	29	62.1	37.9			↑					↓																																↑					↑
SP2	28	67.9	32.1									↑											↓				↑		↑					↑														↑
MEF2C	27	74.1	25.9										↑						↑																									↓
SP1	27	55.6	44.4	↑								↑											↓										↓	↑				↓						↓
MEF2A	26	65.4	34.6																				↓		↑
TCF7L1	26	69.2	30.8							↑										↑			↓													↑												↑
ZEB1	24	70.8	29.2				↑													↑															↑
NFIB	23	60.9	39.1									↑	↑						↑				↓		↑									↑										↓
ZNF263*	23	43.5	56.5									↑											↓										↓	↑						↑				↓	↑
EBF1	22	27.3	72.7						↑			↑																																↓
FOSL2	22	90.9	9.1																					↑						↑	↑	↑			↑
MAZ	22	31.8	68.2									↑											↓										↓	↑										↓
NR3C1	22	54.5	45.5		↓				↑																									↑						↑							↓
RFX2	22	40.9	59.1									↑									↓		↓					↑					↓								↑
ZNF460	22	81.8	18.2
[truncated: 192 more columns]

## Sheet: Ast2
source_label	n_targets	%_upregulated	%_downregulated	ACBD3	ADAMTS10	ADCYAP1R1	ANGPT1	ANKS1B	APOE	ARHGEF7	ATAD3C	B3GAT2	BAIAP2	BBOX1	BCAN	BCOR	C4orf47	CABLES1	CACNA1B	CD38	CHST3	COG1	CREB5	CST3	DISP3	ECE1	EDNRB	ELF2	ELL2	ELOVL5	ESYT2	FAM131A	FBLN1	FBXO32	FBXO34	FNDC5	FOSL2	GATAD2B	GNA12	GOLIM4	GRB10	GRIN1	ID2	IL17D	IL1RAPL1	JARID2	KCNH1	KLKB1	LINC01285
NFIC	30	66.7	33.3			↑					↓	↑		↑				↓	↓	↑				↑	↑		↑						↑						↓				↑	↑		↓			↑
ZNF148	25	64	36			↑				↓				↑	↑			↓		↑	↓			↑	↑		↑					↓	↑										↑			↓		↑
MAZ	20	75	25			↑								↑	↑			↓			↓				↑		↑						↑										↑	↑		↓		↑
ZNF263	20	70	30			↑								↑	↑			↓			↓	↓			↑		↑																↑	↑				↑	↑
EBF1	19	57.9	42.1			↑							↓	↑	↑			↓		↑	↓		↓	↑																			↑			↓
FOSL2*	19	10.5	89.5				↑									↓	↑									↓			↓	↓	↓	↓		↓	↓
STAT3	17	29.4	70.6	↓						↓					↑			↓									↑	↓	↓				↑				↓				↓		↑			↓
RXRA	15	40	60			↑		↓					↓		↑		↑																↑		↓			↓	↓					↑	↓
SP2	15	53.3	46.7												↑			↓							↑		↑																↑			↓		↑
KLF15	14	71.4	28.6			↑			↑						↑			↓	↓		↓			↑	↑								↑										↑					↑
RFX2	14	71.4	28.6										↓					↓		↑							↑					↓								↑			↑					↑
SP1	14	78.6	21.4			↑								↑	↑			↓		↑					↑		↑						↑										↑			↓
TCF7L1	14	28.6	71.4		↓	↑												↓			↓					↓	↑												↓	↑							↓		↑
NR3C1	13	61.5	38.5											↑						↑																↓				↑			↑			↓
MEF2C	12	41.7	58.3										↓											↑									↑		↓							↓			↓			↑
NFIB	12	66.7	33.3							↓								↓		↑																							↑					↑
THRB	12	41.7	58.3			↑		↓							↑				↓	↑	↓			↑								↓	↑		↓				↓
ZFX	12	75	25			↑								↑				↓									↑																↑			↓		↑
RORA	11	63.6	36.4											↑	↑			↓									↑						↑											↑
TFAP2C	11	72.7	27.3			↑								↑	↑			↓									↑						↑										↑			↓
[truncated: 41 more columns]

## Sheet: Ast3
source_label	n_targets	%_upregulated	%_downregulated	AGT	ATP1A2	CLDN10	GTF2IRD1	PIK3C2B	PLEKHB1	RAMP1	SLC9A3R1
MAZ	6	16.7	83.3	↓	↓	↓	↑			↓	↓
SP1	6	16.7	83.3	↓	↓	↓	↑			↓	↓
ZNF148	6	16.7	83.3	↓	↓	↓	↑			↓	↓
NFIC	5	0	100	↓	↓	↓				↓	↓
ZNF263	5	20	80	↓	↓	↓	↑				↓
ZNF281	5	0	100	↓	↓	↓				↓	↓
EBF1	4	0	100	↓		↓				↓	↓
KLF15	4	0	100	↓		↓				↓	↓
NFIX	4	0	100	↓		↓				↓	↓
PATZ1	4	25	75	↓		↓	↑			↓
PURA	4	25	75			↓	↑			↓	↓
RORA	4	0	100	↓	↓	↓					↓
WT1	4	25	75			↓	↑			↓	↓
ZFX	4	25	75	↓		↓	↑				↓
KLF5	3	33.3	66.7				↑			↓	↓
NR1D2	3	0	100	↓		↓					↓
RFX3	3	0	100		↓					↓	↓
RFX5	3	0	100			↓				↓	↓
SP2	3	0	100	↓						↓	↓
SREBF1	3	33.3	66.7					↑	↓		↓

## Sheet: Oligo2
source_label	n_targets	%_upregulated	%_downregulated	ACSBG1	AMMECR1	ANKH	ARFGEF3	ATAD3C	AZIN2	BICD2	BMI1	BRSK1	CA14	CLCA4	CPEB2	CPM	CPPED1	CRELD2	CRHBP	DDX58	DNAJB7	DOP1B	ENPP2	FMO4	FNTA	GALK2	HELLS	HIBADH	JADE3	KCNK10	KDM4D	KIT	LANCL1	LINC01102	LRRC63	LRRC8D	MAPRE2	MARCKSL1	MIDN	MIR100HG	MITF	MTMR10	MTMR2	MTSS1	MYOT	OGA	OVOL3	PPP1R12B	PSAT1
CTCF	34	85.3	14.7		↑		↑					↓		↑	↑	↑	↑			↑			↑												↑	↑	↑	↑	↓	↑	↑	↑		↑	↓	↓		↑	↑
ZNF148	33	84.8	15.2	↓		↑	↑	↓				↓		↑	↑	↑	↑						↑		↑	↑					↑		↑	↑		↑				↑	↑	↑	↑			↓		↑
MAZ	32	87.5	12.5					↓				↓			↑		↑						↑		↑						↑			↑	↑	↑	↑	↑		↑	↑	↑	↑		↓			↑
ZNF263	30	86.7	13.3				↑					↓		↑	↑		↑					↓	↑											↑	↑	↑		↑		↑	↑	↑	↑		↓			↑	↑
RREB1	28	85.7	14.3									↓	↑		↑	↑	↑						↑										↑	↑		↑	↑			↑	↑	↑	↑		↓		↓	↑	↑
TCF12	27	92.6	7.4				↑								↑	↑	↑				↓		↑					↑					↑		↑	↑	↑			↑	↑	↑						↑
KLF15	26	84.6	15.4				↑	↓				↓	↑		↑		↑						↑												↑					↑	↑	↑			↓			↑
SOX9	26	88.5	11.5	↓									↑		↑	↑							↑	↑									↑		↑	↑	↑	↑		↑	↑	↑			↓			↑	↑
ASCL1	25	96	4				↑								↑						↓		↑		↑								↑		↑	↑	↑	↑		↑	↑	↑						↑
PLAG1	25	80	20		↑					↑		↓			↑	↑	↑					↓	↑				↑			↓							↑			↑		↑	↑		↓			↑
SOX4	25	92	8								↑		↑		↑		↑						↑										↑			↑	↑	↑		↑	↑	↑	↑		↓		↓	↑	↑
SP2	25	84	16		↑			↓				↓		↑	↑		↑		↑				↑								↑									↑	↑	↑			↓			↑
SOX12	24	95.8	4.2										↑		↑	↑		↑					↑	↑									↑		↑		↑			↑	↑		↑		↓			↑
SP1	24	83.3	16.7					↓			↑	↓		↑	↑	↑	↑						↑													↑				↑	↑	↑			↓			↑
SRY	24	100	0				↑								↑		↑						↑	↑									↑		↑	↑	↑			↑	↑		↑
TFAP4	24	95.8	4.2				↑		↑						↑	↑	↑						↑	↑									↑			↑		↑		↑	↑	↑						↑
LYL1	23	91.3	8.7				↑								↑						↓		↑	↑									↑			↑					↑	↑						↑	↑
NHLH1	23	91.3	8.7				↑								↑						↓		↑	↑									↑			↑					↑	↑						↑	↑
NHLH2	23	95.7	4.3				↑								↑		↑						↑	↑									↑		↑	↑					↑	↑						↑	↑
SOX2	23	100	0				↑								↑								↑						↑			↑	↑		↑	↑		↑		↑	↑	↑	↑						↑
[truncated: 20 more columns]

## Sheet: Oligo1
source_label	n_targets	%_upregulated	%_downregulated	ADAM9	APOE	ARRDC3	CORO1C	EPB41	HEATR4	KCNS3	PDIA4	PMP2	RHBDL3	S100A1	S100B	SEMA5A
SOX10	4	75	25									↑	↓		↑	↑
JUND	3	33.3	66.7				↓	↓							↑
RREB1	3	66.7	33.3					↓						↑	↑
CHD2	2	0	100	↓				↓
ESR2	2	0	100					↓	↓
FOS	2	50	50					↓							↑
HIF1A	2	0	100	↓		↓
IRF9	2	100	0								↑	↑
MEF2A	2	50	50				↓								↑
PPARG	2	50	50						↓			↑
RXRA	2	50	50									↑	↓
SOX12	2	100	0											↑	↑
SOX2	2	50	50							↓					↑
SOX30	2	100	0											↑	↑
SOX8	2	100	0									↑			↑
SP2	2	100	0									↑			↑
SREBF1	2	50	50		↑				↓
STAT2	2	0	100				↓		↓
THRB	2	50	50					↓							↑
ZNF740	2	50	50						↓			↑

## Sheet: Oligo3
source_label	n_targets	%_upregulated	%_downregulated	BCOR
FOSL2	1	0	100	↓

## Sheet: Oligo5
source_label	n_targets	%_upregulated	%_downregulated	HINT1	KIAA0556	LANCL1-AS1	NXN	PCA3	PNMA2	RAB11A	SEMA3B	SH3BP5	TUBB2A
FOXP1	4	0	100			↓		↓			↓		↓
JUND	4	0	100					↓	↓	↓		↓
MEF2C	4	0	100						↓		↓	↓	↓
RREB1	4	0	100	↓		↓		↓	↓
FOXK2	3	0	100		↓	↓		↓
SOX4	3	0	100			↓		↓	↓
SOX9	3	0	100	↓		↓		↓
ZNF148	3	0	100		↓	↓		↓
ASCL1	2	0	100			↓		↓
FLI1	2	50	50				↑			↓
FOXP4	2	0	100			↓		↓
LYL1	2	0	100			↓		↓
MAZ	2	0	100		↓			↓
NEUROD1	2	0	100			↓		↓
NHLH1	2	0	100			↓		↓
NHLH2	2	0	100			↓		↓
PBX3	2	0	100					↓				↓
PURA	2	0	100	↓				↓
RUNX2	2	0	100							↓		↓
SOX5	2	0	100			↓		↓

## Sheet: MG2
source_label	n_targets	%_upregulated	%_downregulated	ANKUB1	ARHGAP25	ARHGAP26-AS1	ATG10	BAG3	CASTOR3	CD28	CEBPA	CEP68	CSNK1D	DDX50	EIF3A	ENPP1	FAM177B	GIMAP8	HOMER1	HTR7	IFNLR1	IQGAP2	KIAA1211L	LINC01645	LINC02422	MAMDC2	MICAL3	MMP28	MTUS1	MYO1E	NANS	OAS1	OPRM1	P4HA1	PARP10	PLA2G7	PPTC7	PTPN1	RNF114	SELENOP	SLC40A1	SLC45A4	SLC8A1-AS1	SP140	SPAG8	SRSF10	TANC1	TBC1D16	TRIB1
SPI1	28	35.7	64.3		↓	↓	↓	↓		↑	↑			↓	↓	↓	↓	↑						↑	↑	↑					↓	↑	↓			↓	↓		↓	↑	↑	↓	↓	↓				↓	↓
SPIC	21	33.3	66.7		↓	↓	↓	↓			↑			↓		↓	↓	↑						↑		↑					↓	↑	↓				↓		↓		↑			↓				↓	↓
ZNF263	21	28.6	71.4		↓		↓	↓			↑			↓			↓	↑	↓		↓	↑		↑							↓						↓		↓		↑		↓	↓			↓	↓	↓
BCL11A	20	35	65		↓		↓	↓		↑	↑			↓			↓	↑						↑		↑					↓	↑	↓				↓		↓		↑		↓	↓				↓	↓
BCL11B	20	35	65		↓		↓	↓		↑	↑			↓			↓	↑						↑		↑					↓	↑	↓				↓		↓		↑		↓	↓				↓	↓
IRF1	20	40	60		↓		↓				↑						↓	↑			↓			↑		↑					↓	↑	↓				↓	↓	↓		↑			↓	↑			↓	↓
RUNX1	20	30	70		↓		↓				↑			↓			↓					↑			↑	↑					↓	↑	↓			↓		↓	↓		↑		↓	↓				↓	↓
STAT2	20	35	65		↓		↓				↑			↓			↓	↑			↓			↑		↑					↓					↓	↓		↓		↑			↓	↑	↓		↓	↓
ELF1	19	26.3	73.7				↓				↑		↓	↓			↓	↑	↓			↑							↓	↓	↓	↑	↓			↓								↓			↓		↓
SPIB	19	31.6	68.4		↓	↓	↓				↑					↓	↓	↑						↑		↑					↓	↑	↓			↓	↓		↓					↓				↓	↓
ZNF148	18	27.8	72.2		↓			↓			↑		↓	↓			↓	↑		↑	↓		↓										↓	↓	↑				↓					↓				↓	↓
IRF3	16	50	50		↓						↑	↓					↓	↑						↑		↑		↑			↓				↑						↑			↓				↓	↓
MAZ	16	18.8	81.2		↓		↓	↓			↑						↓	↑			↓		↓								↓						↓		↓				↓	↓				↓	↓
PRDM1	16	31.2	68.8		↓		↓		↓								↓	↑			↓			↑		↑					↓		↓						↓		↑			↓				↓	↓
RUNX2	15	26.7	73.3		↓		↓		↓		↑		↓				↓															↑			↑	↓					↑	↓	↓	↓					↓
MEF2A	13	23.1	76.9	↓	↓						↑		↓				↓			↑							↓								↑	↓		↓						↓
MEF2C	13	30.8	69.2	↓	↓						↑									↑	↓						↓								↑	↓		↓		↑				↓				↓
ZNF683	13	30.8	69.2		↓		↓										↓	↑						↑		↑					↓		↓				↓		↓		↑			↓					↓
KLF4	12	16.7	83.3		↓						↑			↓			↓				↓		↓								↓								↓					↓				↓	↓
PURA	12	25	75		↓			↓			↑						↓	↑			↓					↑					↓							↓	↓					↓					↓
[truncated: 3 more columns]

## Sheet: MG1
source_label	n_targets	%_upregulated	%_downregulated	ANKRD44	APOE	ARHGAP15	ARHGAP24	ATP10D	BLNK	BNC2	C12orf75	CALCR	CD14	CD274	CD74	CD83	CD84	CD86	CDKN1A	CH25H	CLEC7A	COX10-AS1	CPED1	CRADD	CTSS	CYSLTR1	DIXDC1	DLEU2	DOCK2	DOCK4	DRAM2	EAF2	EXOSC10	FAM126A	FLI1	FOXO3	FOXP2	GPAT3	GPR183	HACD4	HDAC9	HERPUD1	HSPBAP1	IKBIP	IL1A	IL1RAP	IMMP2L	ITPR2	LINC02245
SPI1	88	97.7	2.3	↑	↑	↑	↑	↑	↑	↑	↑	↑	↑	↑	↑	↑	↑	↑	↑	↑	↑	↑	↑		↑	↑			↑	↑	↑	↑			↑	↑	↑		↑	↑	↑	↑	↑	↑	↑		↑	↑	↑
BCL11A	79	97.5	2.5	↑		↑	↑		↑		↑	↑	↑	↑	↑	↑	↑	↑	↑	↑	↑	↑	↑		↑	↑			↑	↑	↑	↑			↑	↑	↑		↑	↑	↑	↑	↑	↑	↑		↑	↑	↑
BCL11B	79	97.5	2.5	↑		↑	↑		↑		↑	↑	↑	↑	↑	↑	↑	↑	↑	↑	↑	↑	↑		↑	↑			↑	↑	↑	↑			↑	↑	↑		↑	↑	↑	↑	↑	↑	↑		↑	↑	↑
IRF1	74	95.9	4.1	↑		↑	↑		↑	↑	↑	↑	↑	↑	↑	↑	↑	↑	↑	↑	↑		↑		↑	↑			↑	↑	↑	↑	↓		↑	↑			↑	↑		↑	↑	↑	↑			↑	↑
SPIB	73	98.6	1.4	↑	↑	↑	↑	↑	↑	↑	↑	↑	↑	↑	↑	↑	↑	↑	↑	↑	↑	↑	↑		↑	↑			↑	↑	↑	↑			↑	↑	↑		↑	↑	↑	↑	↑	↑	↑		↑	↑	↑
STAT2	71	95.8	4.2	↑		↑	↑		↑		↑	↑	↑	↑	↑	↑	↑	↑	↑	↑	↑	↑	↑		↑				↑	↑	↑	↑			↑	↑			↑	↑	↑	↑	↑	↑	↑		↑	↑	↑
RUNX1	70	97.1	2.9	↑		↑	↑	↑	↑	↑	↑	↑	↑	↑	↑	↑	↑	↑	↑	↑	↑		↑		↑				↑	↑	↑	↑			↑	↑	↑	↑	↑		↑	↑		↑	↑	↑		↑
ZNF263	63	95.2	4.8	↑	↑	↑	↑	↑	↑		↑		↑		↑	↑	↑	↑	↑	↑	↑		↑			↑			↑	↑	↑	↑	↓		↑	↑			↑			↑	↑	↑				↑	↑
SPIC	62	98.4	1.6	↑	↑	↑	↑	↑	↑	↑	↑	↑	↑		↑	↑	↑	↑	↑	↑	↑		↑		↑	↑			↑	↑	↑				↑	↑	↑		↑		↑	↑					↑	↑	↑
PRDM1	60	98.3	1.7	↑		↑	↑		↑	↑	↑	↑	↑	↑	↑	↑	↑	↑	↑	↑	↑		↑		↑				↑	↑	↑	↑			↑	↑			↑	↑		↑	↑	↑			↑	↑	↑
ELF1	58	98.3	1.7	↑		↑		↑	↑		↑					↑	↑	↑		↑	↑				↑	↑		↑	↑					↑	↑	↑			↑			↑	↑	↑		↑		↑	↑
MAZ	51	96.1	3.9	↑	↑	↑	↑		↑		↑	↑	↑		↑	↑	↑	↑	↑	↑					↑	↑			↑	↑	↑				↑				↑			↑	↑	↑		↑		↑	↑
ELF2	50	98	2	↑			↑	↑	↑		↑		↑		↑	↑	↑	↑	↑	↑	↑		↑			↑				↑	↑				↑	↑			↑		↑	↑	↑	↑	↑			↑
RUNX2	50	96	4	↑	↑	↑	↑		↑	↑	↑			↑	↑	↑	↑	↑		↑	↑		↑							↑		↑			↑	↑	↑		↑		↑			↑			↑	↑	↑
ZNF148	50	96	4	↑	↑	↑			↑		↑				↑	↑	↑	↑	↑								↓		↑						↑				↑	↑		↑		↑		↑		↑	↑
ZNF683	50	100	0	↑		↑	↑			↑	↑			↑	↑	↑	↑	↑		↑	↑		↑		↑				↑		↑	↑			↑				↑			↑	↑	↑				↑	↑
IRF2	47	95.7	4.3	↑	↑	↑	↑		↑		↑				↑	↑	↑	↑		↑	↑		↑	↑	↑		↓		↑	↑			↓		↑				↑	↑		↑		↑				↑	↑
IRF3	46	97.8	2.2	↑			↑		↑		↑			↑		↑		↑	↑	↑			↑		↑				↑	↑					↑	↑			↑	↑		↑	↑	↑	↑			↑	↑
ETS2	44	97.7	2.3	↑			↑		↑		↑		↑	↑	↑	↑	↑	↑	↑	↑			↑						↑	↑	↑				↑				↑			↑	↑	↑				↑	↑
IRF4	44	97.7	2.3			↑	↑		↑			↑			↑	↑	↑	↑	↑	↑	↑		↑						↑		↑	↑			↑	↑			↑			↑		↑				↑
[truncated: 68 more columns]

## Sheet: OPC1
source_label	n_targets	%_upregulated	%_downregulated	ADAMTS6	AKAP7	ANKRD12	ANO2	ANO6	APOE	AR	ARHGAP42	ARPP21	ASTN2	BAIAP2	BCHE	BRINP1	C1orf21	C4orf47	CALCRL	CASK	CCND1	CCND3	CD9	CDC42SE2	CDH6	CDK12	CDK6	CHST3	CLK4	CLUAP1	CREB5	CRISPLD1	CTTNBP2	DCLK2	DDAH1	DSE	EDNRB	ELMO1	ETS1	ETV5	FABP7	FAM153B	FBXL7	FGD6	FOSB	FREM2	FRMD6	GAD1	GDNF-AS1
TCF7L1	37	75.7	24.3				↑			↑	↑								↑			↓						↓				↑	↑				↑					↓	↑	↓		↑	↑
SOX10	36	91.7	8.3							↑					↑								↑					↓			↑	↑									↑								↑
ZNF148	34	73.5	26.5	↑										↓											↑			↓			↑			↑									↑		↓
TCF7L2	33	90.9	9.1					↑														↓							↑			↑	↑		↑					↑
ZEB1*	31	100	0					↑			↑				↑				↑	↑																↑											↑
FOXP1	29	79.3	20.7													↑					↑		↑		↑		↑																					↑
THRB	29	89.7	10.3					↑								↑							↑			↓						↑	↑										↑					↑
MAZ	28	85.7	14.3				↑		↑					↓		↑												↓			↑	↑							↑										↑
NFIB	28	89.3	10.7					↑								↑	↑								↑			↓							↑								↑
NFIC	26	88.5	11.5								↑					↑			↑									↓																					↑
RXRA	26	80.8	19.2													↑												↓
BACH2	25	96	4	↑									↑						↑		↑											↑	↑
STAT1	25	56	44		↑														↑		↑									↓															↓
ZNF263	25	84	16															↑		↑								↓											↑			↓							↑
ELF1	22	68.2	31.8			↓		↑														↓		↓			↑	↓										↑	↑
MEF2A	22	72.7	27.3	↑								↑		↓		↑						↓			↑	↓
ASCL1	21	85.7	14.3													↑		↑	↑				↑					↓
NR3C1*	21	95.2	4.8		↑						↑																								↑		↑
SP1	21	71.4	28.6									↑													↑			↓						↑									↑
ERG	20	75	25				↑												↑						↑														↑										↑
[truncated: 127 more columns]

[truncated: 7 more sheets: OPC2, Excit1, Excit5, Excit7, Inhib4, Inhib2, Inhib1]
